# Supplementary material for: Genomic signatures of G-protein-coupled receptor expansions reveal functional transitions in the evolution of cephalopod signal transduction
Source: Proc Biol Sci. 2019 Feb 27;286(1897):20182929. doi: 10.1098/rspb.2018.2929 (PMC6408891; doi:10.1098/rspb.2018.2929)
Supplement: Table S2 [file rspb20182929supp2.xlsx]

## Sheet: Escolopes
					Proportion of expression
Class	Group	Tree_ID	Gene_ID	Tau	ANG	Brain	Eyes	Gills	Hemocytes	LO	Skin
A	0	ESCOL_cluster_10234	cluster_10234	0.998517	0.991181	0.00730353	0.00094946	0	0	0	0.000566024
B	0	ESCOL_cluster_10518	cluster_10518	0.714215	0.105734	0.0435678	0.365081	0.0211082	0	0.0961452	0.368363
A	0	ESCOL_cluster_11226	cluster_11226	0.668109	0.12409	0.0854844	0.0881515	0.334298	0	0.151869	0.216107
A	0	ESCOL_cluster_11227	cluster_11227	0.904919	0.151124	0.00732933	0.0429289	0.070571	0.636744	0.0675695	0.0237331
A	1	ESCOL_cluster_11281	cluster_11281	0.919726	0.674927	0.0216064	0.227905	0	0	0	0.0755615
A	0	ESCOL_cluster_1161	cluster_1161	0.890788	0.354968	0.00308435	0.0154218	0	0	0.0223951	0.60413
B	0	ESCOL_cluster_1195	cluster_1195	0.91503	0	0.0042221	0.00152192	0.313123	0	0.0188031	0.66233
A	0	ESCOL_cluster_11954	cluster_11954	1	0	1	0	0	0	0	0
B	0	ESCOL_cluster_12275	cluster_12275	1	0	1	0	0	0	0	0
A	0	ESCOL_cluster_12882	cluster_12882	0.721979	0.229282	0.254284	0.0127544	0.0252406	0	0.374795	0.103645
A	0	ESCOL_cluster_12889	cluster_12889	0.789276	0	0.440045	0	0.118327	0	0	0.441629
A	0	ESCOL_cluster_12905	cluster_12905	0.726191	0.0500082	0.179237	0.302558	0.00521714	0	0.378379	0.0846013
B	0	ESCOL_cluster_1308	cluster_1308	0.926164	0	0.00482291	0.00783723	0.294348	0	0	0.692992
A	0	ESCOL_cluster_13265	cluster_13265	0.93425	0.0102899	0.0898866	0.717102	0.090525	0	0.0844036	0.00779255
B	0	ESCOL_cluster_13284	cluster_13284	0.943976	0.748423	0.0647262	0.0657439	0.0555669	0	0	0.0655404
B	0	ESCOL_cluster_13646	cluster_13646	0.83935	0.509191	0.0349634	0.408507	0.00985222	0	0.033041	0.00444551
B	0	ESCOL_cluster_13699	cluster_13699	0.963367	0.0565871	0.819809	0.0907992	0.0125679	0	0.00733503	0.0129017
C	0	ESCOL_cluster_13809	cluster_13809	0.997151	0	0.000527647	0.000470883	0.00655366	0	0.00925381	0.983194
A	0	ESCOL_cluster_14348	cluster_14348	0.856977	0.538173	0.205257	0	0.256571	0	0	0
F	0	ESCOL_cluster_14354	cluster_14354	0.668299	0.285877	0.113326	0.0713269	0.334425	0	0.0919704	0.103075
A	0	ESCOL_cluster_14468	cluster_14468	0.807303	0.142186	0.093729	0.162643	0.0114017	0	0.126258	0.463783
B	0	ESCOL_cluster_14700	cluster_14700	0.846187	0	0.520053	0.157493	0.255352	0	0.0496211	0.0174808
A	0	ESCOL_cluster_15076	cluster_15076	NA	NA	NA	NA	NA	NA	NA	NA
A	0	ESCOL_cluster_15189	cluster_15189	0.989205	0	0.939168	0.0303752	0.00394056	0	0.0265167	0
A	0	ESCOL_cluster_15608	cluster_15608	1	0	1	0	0	0	0	0
A	0	ESCOL_cluster_16021	cluster_16021	0.981008	0	0.0258126	0.897706	0	0	0	0.0764818
A	0	ESCOL_cluster_16239	cluster_16239	0.96347	0	0.820225	0	0	0	0	0.179775
C	0	ESCOL_cluster_16452	cluster_16452	0.997745	0.0060033	0.000338811	0.000937024	0.00607212	0	0	0.986649
B	0	ESCOL_cluster_16480	cluster_16480	0.938944	0.731883	0.0471092	0.00822721	0.110786	0	0.0525189	0.0494759
A	0	ESCOL_cluster_16505	cluster_16505	0.998116	0	0.988824	0	0.00769404	0	0	0.00348197
A	1	ESCOL_cluster_16569	cluster_16569	0.933583	0.71505	0.176589	0.083612	0	0	0	0.0247492
B	0	ESCOL_cluster_16803	cluster_16803	0.913309	0	0.657831	0.0759036	0.214458	0	0	0.0518072
A	0	ESCOL_cluster_16948	cluster_16948	0.99722	0	0	0.983594	0.0131602	0	0	0.00324618
A	0	ESCOL_cluster_16991	cluster_16991	1	0	0	0	1	0	0	0
B	0	ESCOL_cluster_17003	cluster_17003	1	0	0	0	1	0	0	0
A	0	ESCOL_cluster_17067	cluster_17067	0.879643	0.580672	0.393277	0	0	0	0	0.0260504
A	0	ESCOL_cluster_17142	cluster_17142	0.955772	0	0.790285	0.0907873	0.118928	0	0	0
B	0	ESCOL_cluster_17150	cluster_17150	0.740205	0	0.390813	0.103585	0.117539	0	0.104095	0.283968
A	0	ESCOL_cluster_17195	cluster_17195	1	0	1	0	0	0	0	0
A	0	ESCOL_cluster_17239	cluster_17239	1	0	0	1	0	0	0	0
A	0	ESCOL_cluster_17384	cluster_17384	1	0	1	0	0	0	0	0
A	0	ESCOL_cluster_17428	cluster_17428	0.735585	0	0.340737	0.15011	0.0234318	0	0.0990969	0.386624
A	0	ESCOL_cluster_17511	cluster_17511	1	0	1	0	0	0	0	0
A	0	ESCOL_cluster_17542	cluster_17542	0.960985	0.810315	0	0.00567034	0.0455958	0	0	0.138419
A	0	ESCOL_cluster_17563	cluster_17563	NA	NA	NA	NA	NA	NA	NA	NA
A	0	ESCOL_cluster_17564	cluster_17564	NA	NA	NA	NA	NA	NA	NA	NA
A	0	ESCOL_cluster_17566	cluster_17566	NA	NA	NA	NA	NA	NA	NA	NA
A	1	ESCOL_cluster_17568	cluster_17568	0.861553	0.546244	0.0788977	0.220461	0	0	0.135523	0.018875
A	0	ESCOL_cluster_17696	cluster_17696	1	0	1	0	0	0	0	0
A	0	ESCOL_cluster_18006	cluster_18006	1	0	1	0	0	0	0	0
A	0	ESCOL_cluster_18023	cluster_18023	NA	NA	NA	NA	NA	NA	NA	NA
A	0	ESCOL_cluster_18025	cluster_18025	NA	NA	NA	NA	NA	NA	NA	NA
A	0	ESCOL_cluster_18094	cluster_18094	0.981475	0	0.00144412	0.899968	0	0	0.090099	0.00848861
A	0	ESCOL_cluster_18371	cluster_18371	0.928571	0	0.0641304	0.102174	0.133696	0	0	0.7
A	1	ESCOL_cluster_18396	cluster_18396	0.999717	0	0	0.998306	0.00169437	0	0	0
C	0	ESCOL_cluster_18417	cluster_18417	1	1	0	0	0	0	0	0
C	0	ESCOL_cluster_18418	cluster_18418	1	0	1	0	0	0	0	0
A	0	ESCOL_cluster_18545	cluster_18545	0.871951	0	0.565517	0.434483	0	0	0	0
A	0	ESCOL_cluster_18596	cluster_18596	0.952226	0	0.222785	0	0	0	0.777215	0
A	0	ESCOL_cluster_18598	cluster_18598	1	0	1	0	0	0	0	0
A	2	ESCOL_cluster_18700	cluster_18700	0.809796	0.154776	0.0865615	0.467023	0.100952	0	0.0712143	0.119473
A	0	ESCOL_cluster_1871	cluster_1871	0.782842	0	0.434226	0	0	0	0.30617	0.259604
A	0	ESCOL_cluster_18719	cluster_18719	0.865767	0.553895	0.368214	0.0778914	0	0	0	0
A	0	ESCOL_cluster_18723	cluster_18723	0.956301	0	0.792271	0	0	0	0	0.207729
A	0	ESCOL_cluster_18805	cluster_18805	0.803004	0.438443	0.0144294	0.4583	0.0307122	0	0.0507016	0.00741329
A	0	ESCOL_cluster_18939	cluster_18939	0.743056	0	0.393443	0.314426	0	0	0	0.292131
A	0	ESCOL_cluster_19125	cluster_19125	0.704442	0.0513009	0.360575	0.193086	0.188418	0	0.151752	0.0548678
A	0	ESCOL_cluster_19177	cluster_19177	0.867408	0	0.080236	0.129204	0	0	0.556932	0.233628
A	0	ESCOL_cluster_19217	cluster_19217	1	0	1	0	0	0	0	0
A	0	ESCOL_cluster_19218	cluster_19218	NA	NA	NA	NA	NA	NA	NA	NA
A	0	ESCOL_cluster_19219	cluster_19219	NA	NA	NA	NA	NA	NA	NA	NA
A	0	ESCOL_cluster_19222	cluster_19222	1	0	0	0	0	0	0	1
A	0	ESCOL_cluster_19255	cluster_19255	NA	NA	NA	NA	NA	NA	NA	NA
A	0	ESCOL_cluster_19492	cluster_19492	1	0	1	0	0	0	0	0
F	0	ESCOL_cluster_19493	cluster_19493	0.954066	0.783944	0	0.216056	0	0	0	0
A	0	ESCOL_cluster_19499	cluster_19499	0.99069	0	0.947097	0	0.0529032	0	0	0
A	0	ESCOL_cluster_19610	cluster_19610	NA	NA	NA	NA	NA	NA	NA	NA
A	0	ESCOL_cluster_19740	cluster_19740	0.996219	0	0.00846024	0.0137244	0	0	0.977815	0
A	0	ESCOL_cluster_20026	cluster_20026	0.991882	0	0	0	0.0464458	0	0	0.953554
A	0	ESCOL_cluster_2011	cluster_2011	0.570865	0.279735	0.215629	0.077351	0.206093	0	0.145695	0.0754967
A	0	ESCOL_cluster_2014	cluster_2014	0.957361	0	0.796284	0.0763106	0	0	0.110816	0.0165892
A	0	ESCOL_cluster_20144	cluster_20144	1	0	1	0	0	0	0	0
A	0	ESCOL_cluster_20263	cluster_20263	0.909396	0	0.0617729	0.105682	0.647827	0	0.150792	0.0339263
A	0	ESCOL_cluster_20268	cluster_20268	0.902205	0.630212	0.00851248	0.0842591	0	0	0.122493	0.154523
A	0	ESCOL_cluster_20349	cluster_20349	1	0	1	0	0	0	0	0
A	0	ESCOL_cluster_2036	cluster_2036	1	0	1	0	0	0	0	0
A	1	ESCOL_cluster_20426	cluster_20426	NA	NA	NA	NA	NA	NA	NA	NA
A	1	ESCOL_cluster_20427	cluster_20427	0.908503	0	0	0.645586	0.216074	0	0	0.13834
A	1	ESCOL_cluster_20430	cluster_20430	0.79562	0	0.209836	0.340984	0.44918	0	0	0
A	1	ESCOL_cluster_20431	cluster_20431	0.783002	0	0.106834	0.434407	0.182247	0	0.150039	0.126473
A	1	ESCOL_cluster_20432	cluster_20432	0.959761	0.0588391	0.0764466	0.805521	0.00725535	0	0.048664	0.00327376
A	0	ESCOL_cluster_20434	cluster_20434	1	0	1	0	0	0	0	0
B	0	ESCOL_cluster_20453	cluster_20453	0.890375	0.216982	0.0856849	0.603228	0.035938	0	0.0482432	0.00992431
A	1	ESCOL_cluster_20480	cluster_20480	0.857684	0.103852	0.1389	0.539404	0.132911	0	0.0520621	0.0328706
A	1	ESCOL_cluster_20481	cluster_20481	0.663847	0	0.331464	0.0231335	0.330296	0	0.251431	0.0636757
A	0	ESCOL_cluster_20487	cluster_20487	0.895909	0	0.615556	0	0	0	0	0.384444
A	0	ESCOL_cluster_20514	cluster_20514	NA	NA	NA	NA	NA	NA	NA	NA
A	1	ESCOL_cluster_20526	cluster_20526	0.992718	0.95814	0.0418605	0	0	0	0	0
A	0	ESCOL_cluster_20541	cluster_20541	1	0	1	0	0	0	0	0
A	0	ESCOL_cluster_20689	cluster_20689	0.80204	0.0657026	0.332914	0.0198051	0.124489	0	0	0.457089
B	0	ESCOL_cluster_20988	cluster_20988	NA	NA	NA	NA	NA	NA	NA	NA
A	0	ESCOL_cluster_21008	cluster_21008	1	0	1	0	0	0	0	0
A	0	ESCOL_cluster_21019	cluster_21019	1	0	1	0	0	0	0	0
B	0	ESCOL_cluster_21114	cluster_21114	NA	NA	NA	NA	NA	NA	NA	NA
F	0	ESCOL_cluster_21132	cluster_21132	0.731415	0	0.248506	0.382921	0.233305	0	0	0.135269
A	0	ESCOL_cluster_21168	cluster_21168	0.816619	0	0.476126	0.079955	0	0	0.374324	0.0695946
A	0	ESCOL_cluster_21213	cluster_21213	NA	NA	NA	NA	NA	NA	NA	NA
A	0	ESCOL_cluster_21457	cluster_21457	NA	NA	NA	NA	NA	NA	NA	NA
A	0	ESCOL_cluster_21612	cluster_21612	0.901826	0	0	0.62931	0	0	0	0.37069
A	0	ESCOL_cluster_21673	cluster_21673	1	0	1	0	0	0	0	0
A	0	ESCOL_cluster_21681	cluster_21681	0.847049	0	0.521457	0.0393552	0	0	0	0.439188
A	0	ESCOL_cluster_21948	cluster_21948	1	0	1	0	0	0	0	0
A	0	ESCOL_cluster_21992	cluster_21992	0.991184	0	0.94976	0.0296941	0.0205459	0	0	0
A	0	ESCOL_cluster_22146	cluster_22146	0.789205	0	0.10858	0	0.182432	0	0.441546	0.267442
A	0	ESCOL_cluster_22314	cluster_22314	0.903939	0	0.365631	0	0	0	0.634369	0
A	0	ESCOL_cluster_22336	cluster_22336	0.873054	0.567641	0.151598	0.10605	0.157716	0	0	0.0169952
C	0	ESCOL_cluster_22407	cluster_22407	0.945051	0	0.752051	0.0806746	0.0373747	0	0	0.1299
A	0	ESCOL_cluster_22595	cluster_22595	1	0	1	0	0	0	0	0
F	0	ESCOL_cluster_22611	cluster_22611	0.871599	0.564841	0	0.149856	0.195965	0	0	0.0893372
A	0	ESCOL_cluster_22791	cluster_22791	0.759914	0	0.239789	0	0	0	0.40975	0.350461
A	0	ESCOL_cluster_22792	cluster_22792	0.897436	0	0.145125	0.235828	0.619048	0	0	0
A	0	ESCOL_cluster_22825	cluster_22825	0.982382	0.904399	0	0.0532995	0	0	0	0.0423012
A	0	ESCOL_cluster_22871	cluster_22871	0.643996	0.275976	0.074999	0.318875	0.046803	0.173882	0.0920417	0.0174236
A	0	ESCOL_cluster_23127	cluster_23127	NA	NA	NA	NA	NA	NA	NA	NA
A	0	ESCOL_cluster_2314	cluster_2314	0.822901	0	0.151493	0.0803483	0	0	0.484826	0.283333
A	0	ESCOL_cluster_23208	cluster_23208	0.808694	0	0.431169	0	0.0707792	0	0.465584	0.0324675
A	0	ESCOL_cluster_23298	cluster_23298	0.996257	0.978036	0.0141199	0	0	0	0	0.00784437
A	0	ESCOL_cluster_23319	cluster_23319	0.946695	0.757674	0.242326	0	0	0	0	0
A	0	ESCOL_cluster_23340	cluster_23340	1	0	0	0	0	0	0	1
A	0	ESCOL_cluster_23521	cluster_23521	0.96055	0	0.808603	0	0	0	0	0.191397
A	1	ESCOL_cluster_23523	cluster_23523	0.906291	0.6401	0.0605657	0.085025	0.0635607	0	0.105491	0.0452579
A	0	ESCOL_cluster_23617	cluster_23617	1	0	0	0	0	0	0	1
A	1	ESCOL_cluster_23761	cluster_23761	0.611733	0.135526	0.0692336	0.242492	0.144299	0	0.300336	0.108112
C	0	ESCOL_cluster_23926	cluster_23926	1	1	0	0	0	0	0	0
A	0	ESCOL_cluster_24011	cluster_24011	0.797368	0.352964	0.451306	0.0120069	0.0493615	0	0.134362	0
A	0	ESCOL_cluster_24317	cluster_24317	0.841549	0	0.065704	0	0.512635	0	0.20722	0.21444
B	0	ESCOL_cluster_24678	cluster_24678	0.870498	0	0.0162491	0.145403	0.101688	0	0.562742	0.173918
B	0	ESCOL_cluster_24702	cluster_24702	0.688514	0.153177	0.0217581	0.177111	0.14839	0	0.348564	0.151001
B	0	ESCOL_cluster_24730	cluster_24730	0.822309	0	0.278249	0.167137	0.0706215	0	0.483992	0
A	0	ESCOL_cluster_24777	cluster_24777	1	0	1	0	0	0	0	0
B	0	ESCOL_cluster_24865	cluster_24865	0.977247	0	0	0	0	0	0.87988	0.12012
C	0	ESCOL_cluster_24873	cluster_24873	0.940185	0.735896	0.0254185	0.0843149	0.0508369	0	0	0.103534
A	0	ESCOL_cluster_25157	cluster_25157	0.931741	0.709446	0	0	0	0	0.226899	0.063655
A	0	ESCOL_cluster_25331	cluster_25331	0.835472	0	0.442	0.00621861	0	0	0.048553	0.503229
C	0	ESCOL_cluster_25356	cluster_25356	NA	NA	NA	NA	NA	NA	NA	NA
A	0	ESCOL_cluster_25543	cluster_25543	NA	NA	NA	NA	NA	NA	NA	NA
A	0	ESCOL_cluster_25702	cluster_25702	NA	NA	NA	NA	NA	NA	NA	NA
A	0	ESCOL_cluster_25717	cluster_25717	1	0	1	0	0	0	0	0
A	0	ESCOL_cluster_26154	cluster_26154	0.996443	0.979102	0	0.00894107	0	0	0	0.0119573
A	0	ESCOL_cluster_2620	cluster_2620	0.891014	0.0895073	0.604626	0.0891459	0.029635	0	0.109505	0.077581
A	0	ESCOL_cluster_2626	cluster_2626	0.781952	0.320741	0.0601883	0.433222	0.0249013	0	0.0609778	0.0999696
A	0	ESCOL_cluster_26486	cluster_26486	0.937913	0	0.0721977	0.0203133	0.728585	0	0.166667	0.0122369
B	0	ESCOL_cluster_26643	cluster_26643	1	0	1	0	0	0	0	0
A	0	ESCOL_cluster_2677	cluster_2677	0.916903	0.025641	0.14119	0.667298	0.0743012	0	0.0572767	0.0342933
C	0	ESCOL_cluster_26838	cluster_26838	1	0	1	0	0	0	0	0
A	0	ESCOL_cluster_26938	cluster_26938	0.724571	0	0.376992	0	0.315546	0	0	0.307461
A	0	ESCOL_cluster_26953	cluster_26953	0.924197	0	0.687371	0.10766	0.140787	0	0	0.0641822
C	0	ESCOL_cluster_27096	cluster_27096	0.920463	0	0.676946	0.0276065	0.0963289	0	0.126285	0.0728341
A	0	ESCOL_cluster_27138	cluster_27138	0.947618	0	0.760866	0.0260793	0.112715	0	0.0739649	0.026374
A	0	ESCOL_cluster_27142	cluster_27142	0.934063	0.0669032	0.110352	0.716526	0.0752734	0	0.0280425	0.00290246
A	1	ESCOL_cluster_27143	cluster_27143	0.944405	0.181965	0.0681696	0.749866	0	0	0	0
A	0	ESCOL_cluster_27155	cluster_27155	0.755621	0	0.40547	0.0927467	0.195006	0	0.269917	0.0368609
A	0	ESCOL_cluster_27218	cluster_27218	0.971014	0	0.851852	0.121278	0	0	0	0.02687
A	0	ESCOL_cluster_27225	cluster_27225	0.916436	0	0.0906773	0.666051	0.00205351	0	0.223302	0.0179163
A	0	ESCOL_cluster_2727	cluster_2727	1	0	1	0	0	0	0	0
A	0	ESCOL_cluster_27279	cluster_27279	NA	NA	NA	NA	NA	NA	NA	NA
A	0	ESCOL_cluster_27415	cluster_27415	0.97679	0	0.877761	0.122239	0	0	0	0
B	0	ESCOL_cluster_27478	cluster_27478	1	0	0	0	0	0	0	1
A	0	ESCOL_cluster_27596	cluster_27596	1	0	1	0	0	0	0	0
A	0	ESCOL_cluster_27842	cluster_27842	0.922141	0	0.318408	0	0.681592	0	0	0
A	0	ESCOL_cluster_28069	cluster_28069	0.834712	0	0.358211	0	0.0983107	0	0.0414013	0.502077
A	0	ESCOL_cluster_28231	cluster_28231	0.985767	0.0408861	0.0338817	0	0.00130314	0	0.921323	0.00260629
A	1	ESCOL_cluster_28279	cluster_28279	0.873479	0	0	0.431535	0.568465	0	0	0
A	0	ESCOL_cluster_28382	cluster_28382	NA	NA	NA	NA	NA	NA	NA	NA
A	0	ESCOL_cluster_28393	cluster_28393	1	0	1	0	0	0	0	0
C	0	ESCOL_cluster_28413	cluster_28413	0.806548	0	0.46281	0.173554	0	0	0.363636	0
A	0	ESCOL_cluster_28520	cluster_28520	1	0	1	0	0	0	0	0
A	0	ESCOL_cluster_28643	cluster_28643	1	0	1	0	0	0	0	0
A	1	ESCOL_cluster_28882	cluster_28882	0.79947	0.215095	0.10304	0.45389	0	0	0	0.227975
B	0	ESCOL_cluster_28910	cluster_28910	NA	NA	NA	NA	NA	NA	NA	NA
B	0	ESCOL_cluster_28936	cluster_28936	0.92875	0.0745922	0.121798	0.700524	0.0690559	0	0	0.0340297
C	0	ESCOL_cluster_2904	cluster_2904	0.994176	0.00813044	0.966234	0.0134175	0.00119957	0	0	0.0110183
A	0	ESCOL_cluster_3168	cluster_3168	0.9629	0	0.118581	0.817927	0	0	0	0.0634921
C	0	ESCOL_cluster_3528	cluster_3528	0.976749	0	0.877573	0	0.0634301	0	0.0126649	0.0463325
A	0	ESCOL_cluster_3698	cluster_3698	0.837197	0.0510816	0.505864	0.434975	0	0	0	0.00807923
A	1	ESCOL_cluster_3700	cluster_3700	0.830504	0	0.495791	0.21335	0.174071	0	0.0530746	0.0637129
B	0	ESCOL_cluster_371	cluster_371	0.940584	0	0.262806	0	0	0	0	0.737194
A	0	ESCOL_cluster_3749	cluster_3749	1	0	0	0	0	0	0	1
A	0	ESCOL_cluster_38	cluster_38	0.999604	0	0.0014471	0.99763	0.000136184	0	0.000622241	0.000164418
A	0	ESCOL_cluster_380	cluster_380	0.976042	0.874317	0.00945775	0	0.0603195	0	0	0.0559058
A	0	ESCOL_cluster_3920	cluster_3920	0.980993	0	0.0371798	0.897631	0.00280382	0	0.055872	0.00651304
A	0	ESCOL_cluster_3980	cluster_3980	0.621865	0.0801117	0.28905	0.0373184	0.0442458	0	0.305922	0.243352
F	0	ESCOL_cluster_4	cluster_4	0.864347	0.0134272	0.551294	0.126115	0.0235272	0	0.237873	0.0477638
A	1	ESCOL_cluster_4005	cluster_4005	0.613064	0.240298	0.301058	0.167777	0	0	0.0748726	0.215994
B	0	ESCOL_cluster_4057	cluster_4057	0.811404	0	0.469136	0.17284	0	0	0	0.358025
B	0	ESCOL_cluster_4126	cluster_4126	0.912044	0.654562	0.190113	0.0492829	0.0437901	0	0	0.0622521
C	0	ESCOL_cluster_4171	cluster_4171	0.997562	0	0.000155514	0.000673892	0.00419023	0	0.00939993	0.98558
A	0	ESCOL_cluster_4204	cluster_4204	1	0	1	0	0	0	0	0
A	0	ESCOL_cluster_427	cluster_427	0.986329	0	0.0758082	0	0	0	0	0.924192
A	0	ESCOL_cluster_4444	cluster_4444	1	0	1	0	0	0	0	0
A	0	ESCOL_cluster_4645	cluster_4645	1	0	1	0	0	0	0	0
A	0	ESCOL_cluster_4675	cluster_4675	0.986519	0.0276112	0.925165	0.0450776	0.00141143	0	0	0.000735121
A	0	ESCOL_cluster_4728	cluster_4728	0.963634	0	0.820884	0.0193237	0	0	0.159792	0
B	0	ESCOL_cluster_48	cluster_48	0.906609	0	0.640884	0	0	0	0	0.359116
A	0	ESCOL_cluster_4965	cluster_4965	0.792398	0	0.445312	0.112981	0	0	0.121995	0.319712
A	0	ESCOL_cluster_5031	cluster_5031	1	0	1	0	0	0	0	0
A	0	ESCOL_cluster_5170	cluster_5170	0.918771	0.0491917	0.0407621	0.123634	0.672325	0	0.0754811	0.0386066
A	2	ESCOL_cluster_5205	cluster_5205	0.913509	0.658352	0.0808222	0.114548	0.057274	0	0	0.0890042
A	0	ESCOL_cluster_5296	cluster_5296	0.984127	0	0.913043	0	0	0	0	0.0869565
A	0	ESCOL_cluster_531	cluster_531	0.989379	0	0.94009	0.0599097	0	0	0	0
A	0	ESCOL_cluster_561	cluster_561	0.810116	0	0.226321	0.467442	0.115539	0	0.175687	0.0150106
C	0	ESCOL_cluster_5897	cluster_5897	0.939421	0.00256269	0.733421	0.195623	0.0270295	0	0.0186467	0.0227168
B	0	ESCOL_cluster_6078	cluster_6078	0.913611	0.658618	0.102028	0.00626728	0.0484793	0	0.102488	0.0821198
A	1	ESCOL_cluster_6105	cluster_6105	0.667531	0.333401	0.031476	0.163594	0.333911	0	0.137618	0
B	0	ESCOL_cluster_6523	cluster_6523	0.903967	0	0	0.0175471	0.286114	0	0.0618996	0.634439
A	0	ESCOL_cluster_6537	cluster_6537	0.763624	0	0.060141	0.238075	0.413521	0	0.188304	0.0999585
C	0	ESCOL_cluster_6555	cluster_6555	0.963768	0	0.178571	0.821429	0	0	0	0
A	0	ESCOL_cluster_66	cluster_66	0.708026	0.23722	0.0321654	0.0379092	0.363393	0	0	0.329313
A	0	ESCOL_cluster_7034	cluster_7034	0.954202	0	0.189734	0	0.0258227	0	0	0.784443
A	0	ESCOL_cluster_7258	cluster_7258	0.474368	0	0.213842	0.225794	0.170759	0	0.240744	0.148861
A	0	ESCOL_cluster_7414	cluster_7414	0.64473	0.167175	0.0262688	0.112851	0.312809	0	0.061574	0.319323
B	0	ESCOL_cluster_7430	cluster_7430	0.99956	0.997367	0	0	0	0	0	0.00263346
B	0	ESCOL_cluster_7479	cluster_7479	0.809593	0.0516681	0.0500832	0.210318	0.0562644	0.466756	0.0165623	0.148348
A	0	ESCOL_cluster_7605	cluster_7605	0.894161	0	0.611607	0.0366709	0.117666	0	0.0800383	0.154018
B	0	ESCOL_cluster_8002	cluster_8002	0.967229	0.161077	0.00124902	0.00143406	0	0	0.835685	0.000555119
C	0	ESCOL_cluster_8173	cluster_8173	1	0	1	0	0	0	0	0
A	0	ESCOL_cluster_8205	cluster_8205	0.992339	0	0.956051	0	0.0229885	0	0	0.0209601
A	0	ESCOL_cluster_8210	cluster_8210	0.961446	0	0.812135	0	0	0	0	0.187865
A	0	ESCOL_cluster_8274	cluster_8274	0.958276	0	0.79978	0.0693069	0.090209	0	0	0.0407041
A	0	ESCOL_cluster_8429	cluster_8429	0.999954	0	0.000106784	0.999722	6.62182e-05	0	6.15203e-05	4.38472e-05
A	1	ESCOL_cluster_8641	cluster_8641	0.468288	0.0505913	0.221795	0.205872	0.238648	0	0.0552779	0.227816
A	0	ESCOL_cluster_8824	cluster_8824	1	0	1	0	0	0	0	0
A	1	ESCOL_cluster_9016	cluster_9016	0.865275	0	0	0	0.315346	0	0.131664	0.552989
B	0	ESCOL_cluster_9308	cluster_9308	0.884236	0	0.409884	0	0	0	0.590116	0
A	0	ESCOL_cluster_9574	cluster_9574	0.817355	0	0.477129	0.090694	0.236593	0	0	0.195584

## Sheet: Obimac
				Location					Proportion of expression
Class	Group	Tree_ID	Gene_ID	Scaffold	Start	End	Direction	Tau	St15	Testes	Ova	Viscera	Psg	Retina	OL	Sub	Supra	Anc	Sucker	Skin
A	0	A0A0L8I0D3_A0A0L8I0D3_OCTBM	Ocbimv22000086m	Scaffold10064	54153	67692	+	0.672318	0.110568	0.00633147	0.00328212	0.00558659	0.00633147	0.103585	0.217179	0.143855	0.199953	0.179236	0.0118482	0.0122439
A	0	A0A0L8I050_A0A0L8I050_OCTBM	Ocbimv22000667m	Scaffold10417	107052	109097	-	0.800512	0.00182537	0.00014603	0	0.00454518	0.0885306	0.000247794	0.313051	0.214481	0.18345	0.193033	0.000689078	0
B	0	A0A0L8HZT5_A0A0L8HZT5_OCTBM	Ocbimv22000994m	Scaffold10596	206986	216999	-	0.96514	0.0451307	0.00856494	0.722825	0.00480955	0.0295161	0.0132427	0.0285279	0.0487543	0.0272761	0.0457895	0.00942144	0.0161416
A	0	A0A0L8HZH0_A0A0L8HZH0_OCTBM	Ocbimv22001340m	Scaffold10835	140259	156177	-	0.887064	0	0	0.00114331	0	0	0.0175956	0.339345	0.162172	0.445972	0.0337723	0	0
A	0	A0A0L8I0T4_A0A0L8I0T4_OCTBM	Ocbimv22001351m	Scaffold10848	631152	632447	+	0.854039	0.00358457	0.190489	0	0.0289017	0	0.00305908	0.383793	0.113543	0.090834	0.185797	0	0
A	1	A0A0L8G2D5_A0A0L8G2D5_OCTBM	Ocbimv22001500m	Scaffold109542	8238	14942	-	0.920462	0.000220365	0.000871774	0.0131977	0.0684101	0.533356	0.035658	0.0221576	0.083545	0.0446784	0.105945	0.0469184	0.0450417
A	0	A0A0L8G258_A0A0L8G258_OCTBM	Ocbimv22001581m	Scaffold110126	333716	341410	+	0.726772	0.0772888	0.0117054	0.0198828	0.0107487	0.0158464	0.143963	0.249656	0.106889	0.071907	0.227232	0.0171919	0.0476888
A	1	A0A0L8G1V2_A0A0L8G1V2_OCTBM	Ocbimv22001825m	Scaffold111448	3358	4455	+	0.999853	0.00107735	0	0	0	5.57851e-05	0.998389	0	0.000151317	3.62603e-05	0.000290431	0	0
B	0	A0A0L8HY79_A0A0L8HY79_OCTBM	Ocbimv22002607m	Scaffold11721	60638	113577	-	0.999542	0.00396818	0.000816278	0	1.09632e-05	0	0.994987	0.000127506	1.94238e-05	6.19656e-06	0	0	6.49448e-05
A	2	A0A0L8HXR3_A0A0L8HXR3_OCTBM	Ocbimv22002970m	Scaffold11985	1997479	2016655	+	0.999842	0.000179947	0.99826	0.000558626	0.000364837	0	0	0.000528965	0.00010777	0	0	0	0
A	2	A0A0L8HZ00_A0A0L8HZ00_OCTBM	Ocbimv22002972m	Scaffold11985	2042812	2055131	-	0.99999	0	0.999895	0	0	0.000104555	0	0	0	0	0	0	0
A	2	A0A0L8HXU1_A0A0L8HXU1_OCTBM	Ocbimv22002974m	Scaffold11985	2114071	2165203	-	0.908428	0.498184	0.175304	0.0151155	0.00346135	0.0161888	0.0565265	0.018872	0.00515178	0.00324669	0.0169043	0.0765612	0.114484
B	0	A0A0L8HXU2_A0A0L8HXU2_OCTBM	Ocbimv22003008m	Scaffold12002	104105	181243	+	0.945441	0.0175105	0.000483048	0.00425686	0.022341	0.00893639	0	0.148537	0.0966096	0.624943	0.076382	0	0
C	0	A0A0L8HXR6_A0A0L8HXR6_OCTBM	Ocbimv22003020m	Scaffold12007	423268	457197	-	0.696374	0.00440017	0.0013973	0	0.000745677	0.00150479	0.0866598	0.217657	0.204221	0.230421	0.213626	0.0321783	0.00718806
A	1	A0A0L8HWJ7_A0A0L8HWJ7_OCTBM	Ocbimv22004001m	Scaffold12618	2	1542	+	0.77418	0	0	0.0240498	0.0845347	0.287025	0.156619	0.114024	0.100262	0.0688073	0.0943644	0.0346003	0.0357143
A	1	A0A0L8HWH5_A0A0L8HWH5_OCTBM	Ocbimv22004002m	Scaffold12618	2030	3453	+	0.843132	0.00225072	0.00295986	0.0291361	0.109453	0.366899	0.130881	0.0965037	0.0635136	0.0667509	0.0787754	0.0209657	0.031911
A	0	A0A0L8FY70_A0A0L8FY70_OCTBM	Ocbimv22004553m	Scaffold129911	15322	16685	+	0.882062	0.0671264	0	0.00172589	0.000281794	0.000366561	0.00746104	0.435291	0.100041	0.107677	0.275684	0.0014357	0.00290958
B	0	A0A0L8HX80_A0A0L8HX80_OCTBM	Ocbimv22004602m	Scaffold13013	798406	800627	+	0.767338	0.0182547	0.0024356	0.00526484	0.0703619	0.141216	0.0416267	0.083155	0.280956	0.166802	0.111201	0.047482	0.0312446
B	0	A0A0L8IFW4_A0A0L8IFW4_OCTBM	Ocbimv22005132m	Scaffold1333	1293457	1308675	+	0.711052	0.10216	0.0479066	0.00199611	0.0636707	0.0857815	0.101955	0.148701	0.11778	0.0717575	0.239324	0.00545603	0.0135121
B	0	A0A0L8FYA8_A0A0L8FYA8_OCTBM	Ocbimv22005164m	Scaffold133633	40161	142047	+	0.578605	0.0860768	0.00935606	0.0270657	0.0360877	0.0173198	0.0540201	0.141924	0.126576	0.156678	0.177452	0.115874	0.0515697
A	0	A0A0L8HV27_A0A0L8HV27_OCTBM	Ocbimv22005278m	Scaffold13414	541677	591265	+	0.875411	0.0249332	0.0553022	0.421856	0.0972514	0.0929974	0.0410039	0.0189067	0.0369863	0.0114149	0.0670007	0.0470305	0.0853166
A	0	A0A0L8FWF7_A0A0L8FWF7_OCTBM	Ocbimv22006111m	Scaffold139662	38171	39577	-	0.756388	0	0	0.0205743	0	0.0595359	0	0.271759	0.183063	0.181848	0.256369	0.0106922	0.0161597
A	2	A0A0L8HTH5_A0A0L8HTH5_OCTBM	Ocbimv22006236m	Scaffold14030	66712	89767	-	0.673021	0.0147282	0.000647228	0.0160794	0.0463464	0.144579	0.149984	0.0790456	0.0699925	0.0695872	0.0664794	0.124987	0.217544
A	2	A0A0L8HTN7_A0A0L8HTN7_OCTBM	Ocbimv22006261m	Scaffold14030	582483	585292	-	0.999759	0	0.997361	0	0	0	0	0	0	0	0	0	0.00263865
A	2	A0A0L8HTK0_A0A0L8HTK0_OCTBM	Ocbimv22006262m	Scaffold14030	585360	595498	+	0.999668	0	0.996365	0	0	0	0	0	0.00135982	0	0	0	0.00227472
A	2	A0A0L8HTN0_A0A0L8HTN0_OCTBM	Ocbimv22006266m	Scaffold14030	600756	608590	-	0.994675	0	0.94467	0	0.00245072	0.000224066	0	0	0	0	0	0.0211462	0.0315093
A	2	A0A0L8HTP1_A0A0L8HTP1_OCTBM	Ocbimv22006267m	Scaffold14030	612518	614092	-	0.950159	0	0	0	0.0141139	0.0022965	0.64589	0.00127743	0.00103821	0	0	0.176543	0.158841
A	0	A0A0L8FVS8_A0A0L8FVS8_OCTBM	Ocbimv22006542m	Scaffold143891	366979	393466	-	0.869814	0	0	0.00641754	0.0440141	0	0	0.411177	0.230577	0.206724	0.10109	0	0
B	0	A0A0L8HT54_A0A0L8HT54_OCTBM	Ocbimv22006741m	Scaffold14610	476152	521943	-	0.83912	0.00527098	0	0.0899735	0.0391945	0.214315	0.361053	0.0723071	0.0398703	0.0501033	0.0107157	0.0892012	0.0279961
B	0	A0A0L8HT24_A0A0L8HT24_OCTBM	Ocbimv22006809m	Scaffold14665	11668	13623	-	0.852828	0.00213535	0.00173524	0.00430114	0.0250936	0.0739327	0.0307908	0.0756722	0.38184	0.216144	0.144386	0.0259634	0.0180048
A	0	A0A0L8HT07_A0A0L8HT07_OCTBM	Ocbimv22006851m	Scaffold14699	374115	382512	-	0.873946	0	0	0	0.00329856	0	0	0.419007	0.219904	0.197617	0.160174	0	0
A	0	A0A0L8FVA0_A0A0L8FVA0_OCTBM	Ocbimv22006940m	Scaffold147743	26546	27505	-	NA	NA	NA	NA	NA	NA	NA	NA	NA	NA	NA	NA	NA
C	0	A0A0L8HU19_A0A0L8HU19_OCTBM	Ocbimv22006946m	Scaffold14775	30066	35661	-	0.999511	0.00417346	0	0	9.27714e-05	0	0	0	0.000245631	0.000626018	6.98928e-05	0.994655	0.00013702
C	0	A0A0L8HSW2_A0A0L8HSW2_OCTBM	Ocbimv22006948m	Scaffold14775	63026	78743	-	0.980254	0.00352589	0.118165	0	0.000234424	0.000101647	0.00129283	0.001188	0.0296366	0.0208377	0.00300177	0.821555	0.00046059
B	0	A0A0L8FUF6_A0A0L8FUF6_OCTBM	Ocbimv22007591m	Scaffold153502	1428	13180	-	0.714798	0.241708	0.0130276	0.00165221	0.0366996	0.019885	0.0783704	0.1515	0.0713521	0.176134	0.102203	0.0502974	0.0571694
A	0	A0A0L8HQC9_A0A0L8HQC9_OCTBM	Ocbimv22008667m	Scaffold16114	592355	593479	+	0.873346	0.0156802	0	0	0.0753855	0	0.0818472	0.0863703	0.112217	0.417851	0.167571	0	0.0430775
A	0	A0A0L8FSJ2_A0A0L8FSJ2_OCTBM	Ocbimv22009073m	Scaffold164360	32468	45636	-	0.878203	0.00220249	0.000402697	0.000569521	0.000278713	0.0710642	0.00109368	0.0715682	0.0112896	0.118944	0.0275689	0.427393	0.267625
A	0	A0A0L8HPP2_A0A0L8HPP2_OCTBM	Ocbimv22009347m	Scaffold16683	22061	23230	-	0.931158	0.002117	0	0	0.000716673	0	0	0.205874	0.0635101	0.569066	0.106239	0.0471956	0.00528279
A	1	A0A0L8HPF2_A0A0L8HPF2_OCTBM	Ocbimv22009806m	Scaffold17079	24786	25873	+	0.7657	0.00753049	0.00319475	0.00845753	0.0902803	0.279541	0.174	0.128075	0.084718	0.0546245	0.0958425	0.0486344	0.0251016
A	2	A0A0L8FRL7_A0A0L8FRL7_OCTBM	Ocbimv22009966m	Scaffold171754	29	949	+	0.916244	0	0	0	0.0321887	0	0.520475	0	0	0.00566303	0.00303338	0.250963	0.187677
A	0	A0A0L8HQC0_A0A0L8HQC0_OCTBM	Ocbimv22010085m	Scaffold17347	252244	275672	+	0.999666	0.00204888	8.11318e-05	4.09292e-05	0.000102686	4.26245e-05	0.996337	0.000278512	3.6812e-05	5.03744e-06	0.000673273	9.13036e-06	0.000343902
A	0	A0A0L8FRC6_A0A0L8FRC6_OCTBM	Ocbimv22010116m	Scaffold173626	456909	458941	+	0.957137	0	0	0	0.00129261	0	0	0.102988	0.126459	0.679583	0.089677	0	0
A	0	A0A0L8FRB5_A0A0L8FRB5_OCTBM	Ocbimv22010128m	Scaffold173767	25273	62280	-	0.797355	0.0238579	0.0973027	0.0290972	0	0.0449089	0.00508032	0.159988	0.107594	0.121628	0.309684	0.019367	0.081491
A	0	A0A0L8HNS9_A0A0L8HNS9_OCTBM	Ocbimv22010400m	Scaffold17639	350075	351376	-	0.73529	0.255636	0	0	0	0	0	0.107689	0.1093	0.188003	0.111916	0.227456	0
A	0	A0A0L8FQN5_A0A0L8FQN5_OCTBM	Ocbimv22010749m	Scaffold180013	3530	5157	+	0.791616	0.0667718	0.00313566	0.00739727	0.0555777	0.085756	0.124379	0.125688	0.111286	0.0837921	0.303746	0.00988485	0.0225846
A	0	A0A0L8HMZ4_A0A0L8HMZ4_OCTBM	Ocbimv22010909m	Scaffold18152	139956	142067	-	0.844307	0.00842622	0.00235934	0.000594048	0.000387606	0.02056	0.0125761	0.181796	0.368647	0.246467	0.155042	0.00238041	0.000764679
A	1	A0A0L8HMT0_A0A0L8HMT0_OCTBM	Ocbimv22011018m	Scaffold18222	33102	58024	-	0.697922	0.000975267	0.00095148	0.00234897	0.0850386	0.231329	0.0158184	0.0231923	0.197432	0.117746	0.160562	0.112394	0.0522125
A	1	A0A0L8HMV5_A0A0L8HMV5_OCTBM	Ocbimv22011019m	Scaffold18222	58264	59475	-	0.80675	0	0.144214	0.00187313	0.127969	0.0148524	0.0260911	0.037131	0.319923	0.179356	0.124322	0.00500605	0.0192617
C	0	A0A0L8HMP9_A0A0L8HMP9_OCTBM	Ocbimv22011096m	Scaffold18331	439042	444131	-	0.963723	0	0	0	0	0	0	0.213747	0.0397351	0.714775	0.0317424	0	0
F	0	A0A0L8FPZ8_A0A0L8FPZ8_OCTBM	Ocbimv22011206m	Scaffold184478	116869	118722	+	0.854565	0.384648	0.0231384	0.00642733	0.00585805	0.0225875	0.0231384	0.0763934	0.0833716	0.134607	0.103204	0.0560095	0.080617
A	0	A0A0L8HNX8_A0A0L8HNX8_OCTBM	Ocbimv22011212m	Scaffold18448	59477	65558	-	0.984889	0.023667	0.0022167	0.857469	0.00153891	0.00160002	0.0616676	0.00311671	0.0101113	0.00894458	0.0267226	0.000523341	0.00242226
A	1	A0A0L8HM63_A0A0L8HM63_OCTBM	Ocbimv22011399m	Scaffold18646	1072673	1073497	-	0.87088	0	0.0300372	0	0.0685132	0	0	0.0279066	0.0914902	0.0576513	0.159168	0.152066	0.413168
A	1	A0A0L8HMG6_A0A0L8HMG6_OCTBM	Ocbimv22011400m	Scaffold18646	1074875	1075798	-	0.796413	0	0.0287129	0	0.0471227	0	0	0.025638	0.114213	0.0794697	0.178507	0.217643	0.308694
A	1	A0A0L8HNL1_A0A0L8HNL1_OCTBM	Ocbimv22011401m	Scaffold18646	1079805	1080629	-	0.799808	0	0.237607	0	0	0	0	0	0.247521	0.202578	0.312293	0	0
A	1	A0A0L8HM69_A0A0L8HM69_OCTBM	Ocbimv22011402m	Scaffold18646	1088499	1096955	-	0.558681	0.0900983	0.139515	0.095705	0.117871	0.0354656	0.0848828	0.00348137	0.162985	0.00676715	0.170809	0.0024513	0.0899679
A	1	A0A0L8HM91_A0A0L8HM91_OCTBM	Ocbimv22011403m	Scaffold18646	1108769	1109692	-	0.863472	0.0219119	0	0.0680231	0.399711	0.327474	0	0.0644113	0.0261257	0.0250421	0	0.0453889	0.0219119
A	1	A0A0L8HM67_A0A0L8HM67_OCTBM	Ocbimv22011404m	Scaffold18646	1121621	1123623	-	0.765373	0	0.186173	0.0354445	0.261358	0.0601482	0	0	0.0116716	0.0186173	0.0596112	0.27926	0.0877162
A	1	A0A0L8HMH1_A0A0L8HMH1_OCTBM	Ocbimv22011405m	Scaffold18646	1131194	1132021	-	0.657239	0.10898	0.131505	0.0220043	0.00720024	0.0354153	0.0812468	0.0591123	0.143224	0.0716118	0.209627	0.0662735	0.0637996
A	0	A0A0L8HMQ0_A0A0L8HMQ0_OCTBM	Ocbimv22011999m	Scaffold19256	935257	965173	-	0.939335	0.00501298	0	0	0.015218	0.00220351	0.03925	0.123259	0.0908947	0.599767	0.120504	0.00389057	0
A	0	A0A0L8FP69_A0A0L8FP69_OCTBM	Ocbimv22012044m	Scaffold193391	36696	39720	+	0.767277	0.00268806	0	0	0.0151876	0.0023655	0.00219077	0.205637	0.229829	0.25671	0.280903	0.00278215	0.00170692
C	0	A0A0L8HMD0_A0A0L8HMD0_OCTBM	Ocbimv22012257m	Scaffold19600	27447	112292	+	0.801945	0.0025989	0	0.000672027	0.000880177	0.000190309	0.00660133	0.205771	0.106454	0.314604	0.26108	0.0969384	0.00421058
A	1	A0A0L8HL06_A0A0L8HL06_OCTBM	Ocbimv22012294m	Scaffold19653	109326	110153	+	0.822665	0	0	0.338905	0.119125	0.0147751	0	0	0.100656	0.0767384	0.0256718	0.173608	0.150522
B	0	A0A0L8HL70_A0A0L8HL70_OCTBM	Ocbimv22012434m	Scaffold19803	488166	544585	-	0.60828	0.00269616	0.0843936	0.024561	0	0.00531846	0.00500452	0.171742	0.180975	0.178759	0.150874	0.00731288	0.188362
B	3	A0A0L8HJV3_A0A0L8HJV3_OCTBM	Ocbimv22012964m	Scaffold20194	30751	45348	-	0.857822	0.076864	0.0707057	0.00193186	0.390022	0.00839345	0	0.00608982	0.0816537	0.0463008	0.222381	0.0098988	0.0857592
A	0	A0A0L8HJG8_A0A0L8HJG8_OCTBM	Ocbimv22013231m	Scaffold20504	564051	565190	+	0.737384	0.211811	0.0426329	0.00636109	0.257151	0.0403772	0.0489488	0.0284219	0.0457909	0.0464676	0.139177	0.0586484	0.0742128
A	0	A0A0L8FNE5_A0A0L8FNE5_OCTBM	Ocbimv22013250m	Scaffold205189	5320	49044	-	0.927872	0.00647508	0.000172669	0.00884928	0.000199109	0	0.557596	0.140833	0.0830969	0.0669092	0.0760822	0.0544986	0.00528798
A	0	A0A0L8HKI3_A0A0L8HKI3_OCTBM	Ocbimv22013310m	Scaffold20554	667121	668170	-	0.827939	0.0119898	0	0	0	0.189587	0	0.221413	0.0839559	0.345701	0.141847	0.00103436	0.00447216
A	1	A0A0L8FND2_A0A0L8FND2_OCTBM	Ocbimv22013341m	Scaffold205893	7377	9320	+	0.965821	0.00897987	0.726761	0.00536509	0.0168563	0.0761006	0.0216887	0.0254176	0.0190252	0.0312012	0.0433773	0.0100453	0.0151821
A	1	A0A0L8HJ61_A0A0L8HJ61_OCTBM	Ocbimv22013365m	Scaffold20613	9903	39870	-	0.696713	0	0	0	0.12671	0.0824104	0.0123778	0.0827362	0.18013	0.0843648	0.230619	0.117915	0.0827362
A	1	A0A0L8HJ24_A0A0L8HJ24_OCTBM	Ocbimv22013367m	Scaffold20613	50476	51693	-	0.93791	0.00040351	0	0	0.00368037	0.0021284	0	0.00591963	0.0330346	0.0174928	0.00616351	0.59418	0.336997
B	0	A0A0L8HIL4_A0A0L8HIL4_OCTBM	Ocbimv22013682m	Scaffold20933	184324	224115	-	0.809808	0.0848159	0.323404	0.00724038	0.0459247	0.0342711	0.14136	0.0965384	0.0633016	0.0500621	0.0855054	0.0330299	0.034547
A	2	A0A0L8HIJ1_A0A0L8HIJ1_OCTBM	Ocbimv22013759m	Scaffold21063	18670	19834	+	0.996633	0	0.964282	0	0	0	0.0348649	0	0.000852777	0	0	0	0
A	2	A0A0L8HIH6_A0A0L8HIH6_OCTBM	Ocbimv22013760m	Scaffold21063	32169	35218	+	0.999695	0.00039433	0.996659	0	0	0	0.00294664	0	0	0	0	0	0
B	0	A0A0L8FNG1_A0A0L8FNG1_OCTBM	Ocbimv22013894m	Scaffold211991	88511	90897	-	0.883424	0.438148	0.00315388	0.00781561	0.0218285	0.0410517	0.0278283	0.0358808	0.145655	0.0671038	0.0888138	0.0394333	0.0832876
A	0	A0A0L8HJF9_A0A0L8HJF9_OCTBM	Ocbimv22014005m	Scaffold21242	865381	866475	-	0.901007	0.1837	0.0325873	0.00162936	0.0143615	0.478716	0.0219171	0.106413	0.0302802	0.0230418	0.0744028	0.030857	0.00209366
A	0	A0A0L8HHY3_A0A0L8HHY3_OCTBM	Ocbimv22014186m	Scaffold21450	509089	535985	-	0.886581	0	0	0	0	0	0	0.444918	0.0651392	0.419608	0.0703344	0	0
B	3	A0A0L8FLR8_A0A0L8FLR8_OCTBM	Ocbimv22014869m	Scaffold224076	4	69706	-	0.962057	0.00315755	0.00369537	0.00815411	0.0362598	0	0.00470741	0.0386308	0.0188528	0.0156142	0	0.165395	0.705533
A	0	A0A0L8FLN9_A0A0L8FLN9_OCTBM	Ocbimv22014935m	Scaffold224488	137926	145072	-	0.874637	0.420346	0.00206586	0.000810565	0.00899511	0.351484	0.0327095	0.0311314	0.0183632	0.0146332	0.0327095	0.0779003	0.00885165
A	0	A0A0L8HFU3_A0A0L8HFU3_OCTBM	Ocbimv22015499m	Scaffold23223	668807	715808	-	0.887586	0	0	0	0.00204697	0.0898672	0	0.186946	0.124816	0.120932	0.447117	0.00209135	0.0261835
A	0	A0A0L8HFQ2_A0A0L8HFQ2_OCTBM	Ocbimv22015630m	Scaffold23307	808028	809218	-	0.839619	0.00554079	0	0	0.00491245	0	0.0010339	0.36177	0.104342	0.201829	0.319881	0	0.000691171
A	0	A0A0L8HGV9_A0A0L8HGV9_OCTBM	Ocbimv22015700m	Scaffold23404	99222	102416	+	0.861743	0	0	0	0	0	0	0.305529	0.188984	0.106935	0.396694	0.00185781	0
A	0	A0A0L8FL11_A0A0L8FL11_OCTBM	Ocbimv22015878m	Scaffold237127	233574	236303	+	0.860857	0.0197584	0.00242145	0.002371	0.0052717	0.0744091	0.0141251	0.0975306	0.0475882	0.164793	0.073148	0.395167	0.103416
A	0	A0A0L8IEK9_A0A0L8IEK9_OCTBM	Ocbimv22015973m	Scaffold2378	264341	265808	+	0.847601	0	0	0	0.062273	0	0	0.373638	0.0874416	0.368448	0.108199	0	0
A	0	A0A0L8IDE8_A0A0L8IDE8_OCTBM	Ocbimv22015979m	Scaffold2378	1085854	1087200	+	0.860219	0.0224575	0.0503276	0.00470041	0	0	0	0.0978065	0.0413066	0.0280125	0.143861	0.217453	0.394075
B	3	A0A0L8FKK5_A0A0L8FKK5_OCTBM	Ocbimv22016162m	Scaffold240134	63448	87673	+	0.759051	0.0292471	0.273939	0.00479394	0.123273	0.0455223	0.0308182	0.0555936	0.0281191	0.0304153	0.043508	0.221972	0.112799
A	0	A0A0L8FKJ5_A0A0L8FKJ5_OCTBM	Ocbimv22016174m	Scaffold240252	17955	19649	+	0.836035	0.00522324	0	0	0	0	0	0.193188	0.139525	0.356683	0.270464	0.0310175	0.00389954
A	1	A0A0L8HEG3_A0A0L8HEG3_OCTBM	Ocbimv22016528m	Scaffold24556	550579	551502	-	0.970572	0.0329322	0	0	0	0	0	0.0484031	0.00986158	0.0188184	0.100425	0.0341084	0.755451
B	3	A0A0L8HDZ7_A0A0L8HDZ7_OCTBM	Ocbimv22016967m	Scaffold25145	77	54762	+	0.727468	0.000808755	0.0204885	0.0159055	0.117135	0.184546	0.0392246	0.0266889	0.118078	0.0979942	0.250134	0.0512212	0.0777753
A	0	A0A0L8HDC9_A0A0L8HDC9_OCTBM	Ocbimv22017054m	Scaffold25234	165950	197995	-	0.734938	0.0174179	0.000955691	0.00112728	0.0121506	0.105345	0.0622496	0.251393	0.155824	0.134475	0.255383	0.00150436	0.00217475
A	0	A0A0L8HEL7_A0A0L8HEL7_OCTBM	Ocbimv22017246m	Scaffold25476	673925	704721	+	0.750384	0.00337771	0.000370852	0.00609381	0.0603578	0.266967	0.125358	0.049505	0.182814	0.154957	0.059197	0.0306432	0.0603578
B	0	A0A0L8HCX5_A0A0L8HCX5_OCTBM	Ocbimv22017376m	Scaffold25624	630701	803214	-	0.754727	0.000548059	0.0326426	0.000340278	0.00044447	0.00211997	0.000981688	0.235485	0.270416	0.231871	0.222837	0.000567331	0.00174656
A	0	A0A0L8HD87_A0A0L8HD87_OCTBM	Ocbimv22017484m	Scaffold25754	183747	184760	-	0.797144	0.0152222	0	0	0	0	0	0.20115	0.234187	0.309462	0.232096	0.00788291	0
A	0	A0A0L8HCF3_A0A0L8HCF3_OCTBM	Ocbimv22017652m	Scaffold26033	374576	377332	-	0.876419	0.00448264	7.7959e-05	0	0.00139352	0.00565203	0.00052866	0.217798	0.0696759	0.423839	0.261643	0.00762537	0.0072843
A	0	A0A0L8HBG4_A0A0L8HBG4_OCTBM	Ocbimv22018382m	Scaffold26939	56998	62423	-	0.742607	0.0176723	0.00435011	0.00219447	0.0358107	0.165071	0.0749616	0.104869	0.157691	0.261006	0.137106	0.0131668	0.0261006
F	0	A0A0L8HAJ2_A0A0L8HAJ2_OCTBM	Ocbimv22018859m	Scaffold27647	181011	182639	-	0.95783	0.13028	0	0	0.00689917	0	0.0258294	0.68312	0.00615148	0.137077	0.00660462	0.00342126	0.000617413
B	0	A0A0L8HBE1_A0A0L8HBE1_OCTBM	Ocbimv22019232m	Scaffold28108	41925	48208	+	0.855784	0.0133837	0.0403495	0	0.192329	0	0	0	0	0.000206209	0.000275606	0.386642	0.366814
A	0	A0A0L8H9J0_A0A0L8H9J0_OCTBM	Ocbimv22019454m	Scaffold28375	562113	583677	+	0.935831	0.015366	0.0198514	0	0.0457426	0	0.00241148	0.586216	0.12124	0.134119	0.0750534	0	0
A	0	A0A0L8ICG8_A0A0L8ICG8_OCTBM	Ocbimv22019481m	Scaffold2841	729373	734379	-	0.875826	0.0317876	0	0	0.0192996	0.048904	0.0118767	0.422671	0.199109	0.0986813	0.167671	0	0
A	0	A0A0L8FIS6_A0A0L8FIS6_OCTBM	Ocbimv22019575m	Scaffold285769	12927	14384	-	0.660296	0.211115	0.0086481	0.0591377	0.0515071	0.0349739	0.144029	0.0604095	0.104604	0.119547	0.0734453	0.0858451	0.0467379
C	0	A0A0L8H956_A0A0L8H956_OCTBM	Ocbimv22019676m	Scaffold28716	234921	254763	+	0.842536	0.0139027	0.000239102	0.000507568	0.00862925	0.0103671	0.041708	0.366018	0.135413	0.131417	0.272682	0.0103072	0.00880903
C	0	A0A0L8H9G1_A0A0L8H9G1_OCTBM	Ocbimv22019908m	Scaffold29148	58261	104554	+	0.770508	0.00847808	0.000315464	0.000247551	0.000889432	0.00249742	0.0359278	0.269395	0.191907	0.283735	0.192783	0.0109098	0.00291366
B	0	A0A0L8FHQ6_A0A0L8FHQ6_OCTBM	Ocbimv22019923m	Scaffold291569	382139	383386	-	0.846517	0	0	0	0	0	0	0	0.105072	0.125201	0.324477	0.371981	0.0732689
A	0	A0A0L8H8I0_A0A0L8H8I0_OCTBM	Ocbimv22020068m	Scaffold29347	137662	154475	-	0.979861	0	0	0	0	0	0	0.0556162	0.0395031	0.00540569	0.0288477	0.81865	0.0519778
A	0	A0A0L8H9U0_A0A0L8H9U0_OCTBM	Ocbimv22020152m	Scaffold29483	54844	174733	+	0.738523	0.0161609	0	0.0488781	0.0136898	0.0276762	0.0588119	0.15469	0.170011	0.178413	0.257982	0.0270337	0.0466541
A	1	A0A0L8IC78_A0A0L8IC78_OCTBM	Ocbimv22020457m	Scaffold3013	251859	252782	+	0.9299	0.564621	0	0	0.0228951	0.0297822	0.117888	0	0.0269281	0.00645281	0	0.163802	0.0676305
B	3	A0A0L8IC79_A0A0L8IC79_OCTBM	Ocbimv22020955m	Scaffold3076	65485	77634	+	0.840768	0	0.0238315	0	0.257678	0.0381304	0.00808782	0.00796866	0.042003	0.0680688	0.363431	0.042152	0.148649
B	4	A0A0L8H6C3_A0A0L8H6C3_OCTBM	Ocbimv22021288m	Scaffold31252	160	816	-	0.912456	0	0	0	0.0233865	0.0551124	0	0	0.0886512	0.0489485	0.509427	0.123096	0.151378
B	4	A0A0L8H6V6_A0A0L8H6V6_OCTBM	Ocbimv22021289m	Scaffold31252	9209	18276	-	0.955383	0.00497621	0.00728204	0	0.011757	0.0204152	0.0148557	0.00243342	0.0702685	0.0340861	0.670786	0.060152	0.102988
B	4	A0A0L8H7T3_A0A0L8H7T3_OCTBM	Ocbimv22021290m	Scaffold31252	18935	43078	-	0.95157	0	0.0626959	0	0.0505486	0.031348	0	0	0.0340909	0.0284091	0.652429	0.0480016	0.0924765
B	4	A0A0L8H6B0_A0A0L8H6B0_OCTBM	Ocbimv22021291m	Scaffold31252	28498	30513	-	0.868434	0.00688611	0.368899	0	0	0.0121075	0	0	0	0.0314415	0.408627	0.0142641	0.157775
B	4	A0A0L8H6J8_A0A0L8H6J8_OCTBM	Ocbimv22021292m	Scaffold31252	97505	99613	-	0.822547	0.0387585	0	0	0.118107	0.0634785	0.10773	0	0.0231941	0.338755	0.254219	0.0115055	0.0442518
B	4	A0A0L8H6C9_A0A0L8H6C9_OCTBM	Ocbimv22021293m	Scaffold31252	119818	130790	-	0.796122	0.0857897	0.0139779	0	0.160746	0.20268	0.308389	0.125802	0.0199186	0.0399245	0.03643	0	0.0063425
B	4	A0A0L8H6W0_A0A0L8H6W0_OCTBM	Ocbimv22021294m	Scaffold31252	162408	163373	-	0.971805	0	0.0266356	0	0.0307142	0	0	0	0.05427	0.0948893	0.763276	0	0.0302147
B	4	A0A0L8H7T8_A0A0L8H7T8_OCTBM	Ocbimv22021295m	Scaffold31252	171216	173009	-	0.956396	0	0.129502	0	0	0	0	0	0	0.0420882	0.67584	0.15257	0
A	0	A0A0L8H6A1_A0A0L8H6A1_OCTBM	Ocbimv22021501m	Scaffold31655	10270	14173	+	0.866469	0.00427769	0	0	0.00433253	0	0	0.261676	0.0814798	0.222503	0.405049	0.0206833	0
A	0	A0A0L8IBN4_A0A0L8IBN4_OCTBM	Ocbimv22021693m	Scaffold3193	1688910	1690817	+	0.847949	0.00115619	0.000813144	0	0.000351304	0	0.00172158	0.374174	0.218533	0.202016	0.196933	0.00407207	0.000230603
B	3	A0A0L8H5B7_A0A0L8H5B7_OCTBM	Ocbimv22022047m	Scaffold32724	149314	157512	-	0.986098	0	0.867365	0	0	0.066085	0	0.0276215	0	0	0	0.0389282	0
A	0	A0A0L8H5P3_A0A0L8H5P3_OCTBM	Ocbimv22022153m	Scaffold32997	649606	652649	-	0.945422	0.00686645	0.00544838	0.00232436	0.0018339	0.0108754	0.624862	0.0620539	0.097559	0.0632268	0.123336	0.000723962	0.000890293
B	0	A0A0L8IBN1_A0A0L8IBN1_OCTBM	Ocbimv22022412m	Scaffold3344	49369	63133	-	0.933642	0.0269373	0.00927985	0	0.027324	0.0226841	0.0889319	0.0275818	0.177864	0.578057	0.0232641	0.0145642	0.00351216
A	0	A0A0L8H4W7_A0A0L8H4W7_OCTBM	Ocbimv22022447m	Scaffold33443	407299	409132	+	0.736364	0	0	0.140848	0.0295584	0.019943	0.115919	0.25641	0.0792379	0.0443376	0.188746	0.0603632	0.0646368
A	0	A0A0L8H5F5_A0A0L8H5F5_OCTBM	Ocbimv22022873m	Scaffold34531	70720	71736	-	0.826095	0	0.232872	0	0.26895	0	0	0	0.0790816	0.0758017	0	0.343294	0
A	0	A0A0L8IBA6_A0A0L8IBA6_OCTBM	Ocbimv22022958m	Scaffold3474	199676	205605	+	0.730819	0.0308089	0.0105906	0.00181216	0.0470692	0.0526319	0.0656829	0.0389391	0.252462	0.203039	0.16517	0.078306	0.0534877
A	0	A0A0L8IB86_A0A0L8IB86_OCTBM	Ocbimv22023137m	Scaffold3495	29071	29946	-	1	0	0	0	0	0	0	0	0	0	0	0	1
A	0	A0A0L8H2Y5_A0A0L8H2Y5_OCTBM	Ocbimv22023448m	Scaffold35599	41791	42978	+	0.900393	0.0298063	0.0306266	0	0	0.0175009	0.00742422	0.358222	0.00742422	0.0326775	0.0341815	0.477174	0.00496315
A	0	A0A0L8H2L3_A0A0L8H2L3_OCTBM	Ocbimv22023989m	Scaffold36815	520225	606554	+	0.87718	0.0074119	0.000289598	0.00102264	0.00133939	0.00521276	0.0149324	0.425347	0.106789	0.113124	0.263353	0.0329418	0.0282358
A	1	A0A0L8H275_A0A0L8H275_OCTBM	Ocbimv22024001m	Scaffold36836	9639	10897	-	0.707045	0.236827	0.0227106	0.00099856	0.129017	0.202363	0.0165248	0.0276592	0.0459514	0.0740525	0.155528	0.0747594	0.0136087
A	0	A0A0L8H257_A0A0L8H257_OCTBM	Ocbimv22024070m	Scaffold36997	28382	29332	+	1	0	1	0	0	0	0	0	0	0	0	0	0
A	0	A0A0L8H226_A0A0L8H226_OCTBM	Ocbimv22024071m	Scaffold36997	45859	46851	+	0.983273	0	0.0215991	0	0	0	0	0.036036	0.844595	0.00468469	0	0.0849099	0.00817568
A	0	A0A0L8H1C2_A0A0L8H1C2_OCTBM	Ocbimv22024510m	Scaffold37762	850423	851529	-	0.780553	0.020442	0	0	0.00459945	0.28544	0.0270483	0.0899946	0.292919	0.0737906	0.169519	0.00234335	0.0339038
A	0	A0A0L8H262_A0A0L8H262_OCTBM	Ocbimv22024696m	Scaffold38069	12061	13056	-	0.899988	0	0	0	0	0	0	0.0960786	0.0757624	0.264533	0.47616	0.0797833	0.00768205
A	0	A0A0L8H201_A0A0L8H201_OCTBM	Ocbimv22024767m	Scaffold38164	79352	86312	+	0.897699	0.470519	0.311542	0	0.00473083	0	0	0.0856421	0.0306414	0.01859	0.0783343	0	0
A	0	A0A0L8H0K2_A0A0L8H0K2_OCTBM	Ocbimv22024868m	Scaffold38333	421333	423472	-	0.821988	0.00416838	0	0	0	0	0	0.338051	0.200632	0.170858	0.28629	0	0
C	0	A0A0L8H1K7_A0A0L8H1K7_OCTBM	Ocbimv22024958m	Scaffold38625	270197	272061	-	0.979221	0.813953	0	0	0	0	0	0	0	0.186047	0	0	0
A	0	A0A0L8H0I4_A0A0L8H0I4_OCTBM	Ocbimv22025444m	Scaffold40321	236488	238845	-	1	0	0	0	0	0	1	0	0	0	0	0	0
B	3	A0A0L8GYU3_A0A0L8GYU3_OCTBM	Ocbimv22025564m	Scaffold40771	20162	28558	-	0.843652	0	0.0974643	0	0.0204437	0.00253566	0	0.0106181	0.0653724	0.0246434	0.36767	0.111727	0.299525
B	3	A0A0L8GZG7_A0A0L8GZG7_OCTBM	Ocbimv22025567m	Scaffold40771	51575	63095	-	0.891182	0.0033414	0.0444643	0.00444643	0.105767	0.0405178	0.00928752	0.0260208	0.132867	0.0860345	0.455167	0.028152	0.0639339
B	3	A0A0L8GYU7_A0A0L8GYU7_OCTBM	Ocbimv22025569m	Scaffold40771	91402	99938	-	0.916254	0	0.0594259	0	0.0822412	0.0382024	0.00578341	0.0212766	0.0594259	0.0864859	0.520507	0.0109832	0.115668
A	0	A0A0L8GYV4_A0A0L8GYV4_OCTBM	Ocbimv22025665m	Scaffold41171	21484	22515	+	0.874214	0	0	0	0	0	0	0.288179	0.419526	0.059008	0.233288	0	0
A	0	A0A0L8IA41_A0A0L8IA41_OCTBM	Ocbimv22025759m	Scaffold4138	479434	480447	+	0.841749	0	0	0	0	0	0.00884466	0.330657	0.114997	0.364862	0.135683	0.018406	0.0265503
A	0	A0A0L8IAE0_A0A0L8IAE0_OCTBM	Ocbimv22025760m	Scaffold4138	499109	500104	+	0.844529	0	0	0	0	0.00544116	0.00923297	0.32647	0.118175	0.368979	0.137049	0.0192141	0.0154393
A	0	A0A0L8IBH5_A0A0L8IBH5_OCTBM	Ocbimv22025762m	Scaffold4138	508416	513079	+	0.797857	0.00293263	0.000541604	0.00646704	0.0645856	0.310214	0.0671284	0.0625514	0.0352593	0.050431	0.0388192	0.150869	0.2102
B	3	A0A0L8GYR2_A0A0L8GYR2_OCTBM	Ocbimv22025843m	Scaffold41512	5801	72214	+	0.651647	0.00812934	0.025249	0.102652	0.0484284	0.120036	0.206959	0.140732	0.079555	0.0976845	0.0294709	0.138248	0.00285603
A	0	A0A0L8IAA2_A0A0L8IAA2_OCTBM	Ocbimv22025880m	Scaffold4166	369307	370809	-	0.759988	0.01045	0	0	0.00265738	0.0054584	0.013646	0.231623	0.233418	0.228032	0.274715	0	0
A	1	A0A0L8GY67_A0A0L8GY67_OCTBM	Ocbimv22026027m	Scaffold42096	64559	65689	-	0.750961	0.056906	0.0593141	0.00357405	0.0567793	0.26742	0.060835	0.0593141	0.0908722	0.0653976	0.110517	0.0858026	0.0832679
A	1	A0A0L8GY22_A0A0L8GY22_OCTBM	Ocbimv22026028m	Scaffold42096	129503	136543	-	0.93469	0	0.0246678	0	0.019003	0.148316	0	0.0275518	0.100422	0.0320836	0.0286332	0.581934	0.037388
A	0	A0A0L8IIF4_A0A0L8IIF4_OCTBM	Ocbimv22026523m	Scaffold433	361973	365295	+	0.958541	0.00284082	0.00099897	0	0	0.00399588	0	0.686792	0.118315	0.128305	0.0546312	0.00412075	0
A	0	A0A0L8I9P9_A0A0L8I9P9_OCTBM	Ocbimv22026925m	Scaffold4431	508246	511830	-	0.818705	0.00293573	0	0	0	0	0.000729894	0.333973	0.272027	0.160253	0.228125	0	0.00195536
A	0	A0A0L8I9T9_A0A0L8I9T9_OCTBM	Ocbimv22026973m	Scaffold4445	276366	286218	+	0.840956	0	0.0786389	0	0.041966	0	0	0.363705	0.12741	0.204159	0.063138	0.120983	0
A	0	A0A0L8GVG2_A0A0L8GVG2_OCTBM	Ocbimv22027062m	Scaffold44690	24988	26714	-	0.997467	4.32229e-05	0.0258862	0	0.000657843	0	0.972888	0.000127056	0	0	0.000132044	0.000179066	8.62083e-05
B	0	A0A0L8GV83_A0A0L8GV83_OCTBM	Ocbimv220273681m	NA	NA	NA	NA	NA	NA	NA	NA	NA	NA	NA	NA	NA	NA	NA	NA	NA
A	0	A0A0L8GUP3_A0A0L8GUP3_OCTBM	Ocbimv22027432m	Scaffold45833	155873	165009	-	0.995787	0.0145899	0	0.0151254	0.955708	0	0	0	0.00145899	0.00555489	0	0.00756268	0
C	0	A0A0L8I9C9_A0A0L8I9C9_OCTBM	Ocbimv22027483m	Scaffold4599	421085	454869	+	0.978645	0.00248236	2.35016e-05	8.29901e-05	5.42006e-05	0	0.809777	0.0768209	0.0287895	0.0474439	0.0337836	0.000581665	0.000160105
B	0	A0A0L8GUB8_A0A0L8GUB8_OCTBM	Ocbimv22027591m	Scaffold46288	163233	188263	+	0.639478	0.0157215	0.00191779	0.002033	0.0199219	0.156975	0.00391238	0.119292	0.0871285	0.171137	0.20138	0.0859284	0.134653
A	0	A0A0L8GU33_A0A0L8GU33_OCTBM	Ocbimv22027699m	Scaffold46644	111117	165581	+	0.85805	0.00427425	0.00969279	0	0.00248378	0.00807733	0.0191837	0.0592337	0.390404	0.166931	0.225155	0.106015	0.0085485
B	0	A0A0L8GUB0_A0A0L8GUB0_OCTBM	Ocbimv22027830m	Scaffold46983	1253940	1289806	+	0.704296	0.0113981	0.235142	0.0101416	0	0	0	0.199243	0.194755	0.20373	0.105006	0.038951	0.00163343
A	0	A0A0L8GTV7_A0A0L8GTV7_OCTBM	Ocbimv22027923m	Scaffold47317	422494	504523	+	0.62645	0.0691151	0.00233903	0.00966474	0.035654	0.0852771	0.0387402	0.0564453	0.134819	0.0554707	0.195731	0.156747	0.159996
A	0	A0A0L8I8Z0_A0A0L8I8Z0_OCTBM	Ocbimv22028142m	Scaffold4773	1439039	1454827	+	0.928221	0.0154984	0	0.028153	0.558794	0.00909996	0.285796	0.102659	0	0	0	0	0
A	0	A0A0L8GSR1_A0A0L8GSR1_OCTBM	Ocbimv22028437m	Scaffold48424	87549	93840	+	0.591779	0.00129174	0.0781502	0.0164051	0.12659	0.182135	0.0410127	0.0509591	0.176322	0.0955887	0.145321	0.0439191	0.0423045
A	0	A0A0L8GTV4_A0A0L8GTV4_OCTBM	Ocbimv22028534m	Scaffold48715	498501	523117	+	0.917576	0	0	0	0	0	0	0	0.524476	0.475524	0	0	0
F	0	A0A0L8GT36_A0A0L8GT36_OCTBM	Ocbimv22028628m	Scaffold48973	31435	33252	-	0.83469	0.204713	0.0022026	0.00341188	0.0250492	0.0218101	0.0375739	0.0477231	0.354809	0.134964	0.136691	0.00902636	0.0220261
A	0	A0A0L8I8B0_A0A0L8I8B0_OCTBM	Ocbimv22028718m	Scaffold4924	611635	614137	-	0.801567	0.00386372	0	0	0.00209462	0	0	0.226445	0.314193	0.223615	0.229276	0	0.000513747
A	0	A0A0L8GS86_A0A0L8GS86_OCTBM	Ocbimv22028857m	Scaffold49703	396495	426878	-	0.890781	0.000645894	0.00226773	0	0	0	0.000961743	0.454255	0.106821	0.187025	0.247356	0.000667187	0
A	0	A0A0L8GRA8_A0A0L8GRA8_OCTBM	Ocbimv22029347m	Scaffold51320	154031	158014	+	0.620251	0.0522142	0.0632067	0.0565327	0.0260678	0.00816583	0.113851	0.0859768	0.128769	0.124843	0.193153	0.0867619	0.0604585
A	0	A0A0L8GQW7_A0A0L8GQW7_OCTBM	Ocbimv22029429m	Scaffold51764	77981	79413	+	0.756204	0.0062843	0.00170155	0	0.003941	0	0.0216755	0.230602	0.17841	0.11823	0.27161	0.0250839	0.142462
A	0	A0A0L8I8U1_A0A0L8I8U1_OCTBM	Ocbimv22029503m	Scaffold5210	66608	91356	+	0.766873	0.280552	0	0.179771	0.217904	0	0	0	0	0.0188851	0.0504812	0.137098	0.115308
A	0	A0A0L8GR02_A0A0L8GR02_OCTBM	Ocbimv22029650m	Scaffold52416	187893	189315	-	0.970334	0	0	0	0	0.00337044	0	0.0895273	0.0991822	0.75396	0.0536286	0.0003309	0
A	1	A0A0L8I745_A0A0L8I745_OCTBM	Ocbimv22030501m	Scaffold5518	265466	266482	-	0.869181	0.00321421	0.00809881	0	0.0341668	0.0101235	0.00754201	0.098198	0.410002	0.219427	0.145525	0.0480867	0.0156155
A	0	A0A0L8GNI0_A0A0L8GNI0_OCTBM	Ocbimv22030830m	Scaffold56590	168960	171801	+	0.808614	0	0.00850333	0.0075186	0	0	0.00722584	0.263484	0.322035	0.206262	0.184971	0	0
A	0	A0A0L8GN05_A0A0L8GN05_OCTBM	Ocbimv22030882m	Scaffold56840	212305	214361	-	0.435335	0.0713991	0.0231118	0.0990508	0.0418902	0.0561288	0.134338	0.104829	0.100908	0.117829	0.0573669	0.0544779	0.138671
A	0	A0A0L8GLA8_A0A0L8GLA8_OCTBM	Ocbimv22031689m	Scaffold59591	705987	742135	-	0.866811	0.00530971	0.00100701	0.00904025	0.405667	0.10299	0.0478332	0.0783869	0.0600776	0.0413105	0.0938355	0.0492636	0.105279
A	0	A0A0L8GMA0_A0A0L8GMA0_OCTBM	Ocbimv22031757m	Scaffold59890	621537	622922	-	0.972807	0.00426798	0.000625854	0.000368124	0.00599777	0.00125171	0.0125171	0.0773625	0.0834472	0.769752	0.0247299	0.00368558	0.015994
A	0	A0A0L8I7S0_A0A0L8I7S0_OCTBM	Ocbimv22031762m	Scaffold5990	275344	276598	-	0.780014	0.00107296	0.00132057	0	0	0.0109418	0.00031953	0.174503	0.292411	0.213413	0.264113	0.00889024	0.0330142
A	0	A0A0L8GL27_A0A0L8GL27_OCTBM	Ocbimv22031788m	Scaffold60035	194195	209895	-	0.870169	0	0	0	0	0	0.00113517	0.411838	0.186895	0.207801	0.192331	0	0
A	1	A0A0L8I6D4_A0A0L8I6D4_OCTBM	Ocbimv22031983m	Scaffold6067	549509	550432	-	0.965672	0	0.0456361	0	0	0.0456361	0	0	0	0	0.0792926	0.725898	0.103537
A	0	A0A0L8GK78_A0A0L8GK78_OCTBM	Ocbimv22032135m	Scaffold61594	38298	98549	+	0.941466	0.139673	0.00255734	0.0146877	0	0	0	0.00964505	0.608319	0.144876	0.0488256	0.0241326	0.00728382
C	0	A0A0L8GK03_A0A0L8GK03_OCTBM	Ocbimv22032215m	Scaffold61918	97464	124060	-	0.842916	0	0	0	0	0	0	0.106011	0.182959	0.0891678	0.174373	0.0809115	0.366579
A	0	A0A0L8GJQ9_A0A0L8GJQ9_OCTBM	Ocbimv22032340m	Scaffold62539	1002024	1017668	+	0.819147	0.014359	0	0.00891519	0.334517	0.065641	0.0812623	0.0801578	0.106193	0.0998817	0.162525	0.0178304	0.0287179
A	0	A0A0L8GJM9_A0A0L8GJM9_OCTBM	Ocbimv22032470m	Scaffold62876	372393	373499	-	0.840246	0	0	0	0.115854	0	0	0.0504974	0.362675	0.313563	0.157411	0	0
A	0	A0A0L8GIZ6_A0A0L8GIZ6_OCTBM	Ocbimv22032659m	Scaffold63880	225761	227821	+	0.947745	0	0	0.035174	0.0114549	0	0	0	0.0678578	0.058146	0	0.635	0.192368
A	0	A0A0L8GIM4_A0A0L8GIM4_OCTBM	Ocbimv22032888m	Scaffold64730	64229	65910	+	0.890039	0.0537434	0	0.0471862	0.0236574	0.0658292	0	0.199288	0.0921866	0.452576	0.0606863	0.00484719	0
A	0	A0A0L8GIC9_A0A0L8GIC9_OCTBM	Ocbimv22032956m	Scaffold65021	133021	138605	-	0.920376	0.0166754	0	0.0221901	0	0.00420168	0	0.0667017	0.141807	0.533088	0.215336	0	0
A	2	A0A0L8GI44_A0A0L8GI44_OCTBM	Ocbimv22033043m	Scaffold65425	196934	209719	+	0.999984	0	0.999824	0	0.000101645	0	7.46499e-05	0	0	0	0	0	0
A	2	A0A0L8GIJ7_A0A0L8GIJ7_OCTBM	Ocbimv22033045m	Scaffold65425	237188	250167	+	0.999948	0.000224264	0.999428	0.000348102	0	0	0	0	0	0	0	0	0
B	0	A0A0L8GGX7_A0A0L8GGX7_OCTBM	Ocbimv22033570m	Scaffold67004	44134	95034	-	0.887389	0	0.000985786	0.00521851	0	0	0	0.0640761	0.144787	0.338248	0.446684	0	0
B	0	A0A0L8IH43_A0A0L8IH43_OCTBM	Ocbimv22033605m	Scaffold671	65929	72480	-	0.999316	0	0.00356866	0.00157523	0.992534	0	0	0	0	0	0.00232242	0	0
A	0	A0A0L8GFW2_A0A0L8GFW2_OCTBM	Ocbimv22034103m	Scaffold68969	50176	87661	-	0.741243	0.0241284	0.00389047	0.0105679	0.153561	0.0340416	0.0293656	0.010493	0.158424	0.0347898	0.147576	0.133174	0.259988
C	0	A0A0L8GFV6_A0A0L8GFV6_OCTBM	Ocbimv22034198m	Scaffold69514	42533	67321	+	0.989362	0.0113904	0.000453871	0.00080082	0.0493148	0.0037968	0.00325129	0.00222571	0.012656	0.0177184	0.00235664	0.895243	0.000792092
B	4	A0A0L8GGP0_A0A0L8GGP0_OCTBM	Ocbimv22034321m	Scaffold69694	7530	17531	+	0.941169	0.0128626	0	0	0.0771754	0.00926105	0	0	0.0668853	0.00868223	0.0694578	0.607113	0.148563
B	4	A0A0L8GFC2_A0A0L8GFC2_OCTBM	Ocbimv22034322m	Scaffold69694	32550	33644	+	0.809031	0	0	0	0	0.0228327	0	0.114163	0.17838	0.0296111	0.0991795	0.322512	0.233321
B	4	A0A0L8GFB6_A0A0L8GFB6_OCTBM	Ocbimv22034323m	Scaffold69694	51466	53202	+	0.915695	0.00755438	0	0	0	0	0	0	0.148597	0.0431679	0.518844	0.281836	0
B	4	A0A0L8GFJ1_A0A0L8GFJ1_OCTBM	Ocbimv22034324m	Scaffold69694	60950	62350	+	0.969124	0	0	0	0	0	0	0	0	0	0.746469	0.253531	0
B	4	A0A0L8GFU5_A0A0L8GFU5_OCTBM	Ocbimv22034325m	Scaffold69694	68795	70837	+	0.976408	0	0	0	0	0	0	0	0	0	0.0571076	0.793961	0.148932
B	4	A0A0L8GGP4_A0A0L8GGP4_OCTBM	Ocbimv22034326m	Scaffold69694	79104	82364	-	0.97609	0	0	0	0.00239475	0	0	0	0.164193	0.0404317	0.79176	0.00122009	0
B	4	A0A0L8GFC1_A0A0L8GFC1_OCTBM	Ocbimv22034328m	Scaffold69694	95582	96487	-	0.974055	0	0	0.777969	0.222031	0	0	0	0	0	0	0	0
B	4	A0A0L8GFJ3_A0A0L8GFJ3_OCTBM	Ocbimv22034329m	Scaffold69694	110876	112852	-	1	1	0	0	0	0	0	0	0	0	0	0	0
B	4	A0A0L8GFV0_A0A0L8GFV0_OCTBM	Ocbimv22034330m	Scaffold69694	129672	130925	-	0.981539	0	0	0.0617572	0.013416	0	0	0	0.0633613	0.0302588	0.831207	0	0
B	4	A0A0L8GGP7_A0A0L8GGP7_OCTBM	Ocbimv22034331m	Scaffold69694	153092	154220	+	NA	NA	NA	NA	NA	NA	NA	NA	NA	NA	NA	NA	NA
B	4	A0A0L8GFD1_A0A0L8GFD1_OCTBM	Ocbimv22034332m	Scaffold69694	172488	174461	+	0.98108	0	0	0	0	0	0	0	0	0	0	0.827735	0.172265
B	4	A0A0L8GFC5_A0A0L8GFC5_OCTBM	Ocbimv22034333m	Scaffold69694	202444	204327	+	0.974318	0	0	0	0	0	0	0	0	0	0	0.220273	0.779727
B	4	A0A0L8GFJ7_A0A0L8GFJ7_OCTBM	Ocbimv22034334m	Scaffold69694	207122	209026	+	0.923077	0	0	0	0	0	0	0	0	0	0	0.458333	0.541667
B	4	A0A0L8GFV5_A0A0L8GFV5_OCTBM	Ocbimv22034335m	Scaffold69694	218163	219935	-	0.947992	0.0897436	0	0	0.636095	0	0	0	0	0	0.274162	0	0
A	0	A0A0L8GF50_A0A0L8GF50_OCTBM	Ocbimv22034436m	Scaffold70016	958798	961395	+	0.776653	0.009105	0.00177835	0	0.000684266	0.0020769	0.00100693	0.289283	0.241069	0.211399	0.242924	0	0.00067314
A	0	A0A0L8GFL1_A0A0L8GFL1_OCTBM	Ocbimv22034455m	Scaffold70183	10942	12258	-	0.844506	0.00438875	0	0.00136244	0.00489514	0	0.013745	0.368944	0.167833	0.245963	0.18833	0.00409938	0.000438875
A	0	A0A0L8GES7_A0A0L8GES7_OCTBM	Ocbimv22034590m	Scaffold70716	100769	113161	-	0.994947	0	0	0.00892082	0.0437357	0.947343	0	0	0	0	0	0	0
C	0	A0A0L8GG35_A0A0L8GG35_OCTBM	Ocbimv22034600m	Scaffold70755	448923	501263	+	0.823628	0.00074135	0.00390635	0.00230144	0.00375563	0.00456216	0	0.130755	0.0985751	0.340125	0.287579	0.0936871	0.0340125
A	0	A0A0L8I599_A0A0L8I599_OCTBM	Ocbimv22034708m	Scaffold7113	322431	341700	+	0.921048	0.0124715	0.0674641	0	0.0289693	0.00785608	0.0133553	0.00787572	0.535195	0.0519483	0.0736507	0.0499843	0.151229
B	0	A0A0L8GDU4_A0A0L8GDU4_OCTBM	Ocbimv22035154m	Scaffold73967	7949	182173	-	0.68611	0.121147	0.00657164	0.00234007	0.00694307	0.0164005	0.125147	0.0785739	0.0357154	0.0717165	0.0902886	0.224578	0.220578
C	0	A0A0L8GD40_A0A0L8GD40_OCTBM	Ocbimv22035467m	Scaffold75363	273463	330430	-	0.83733	0.00140317	0.274467	0	0.00028449	0.000123356	0	0.358503	0.0778685	0.0768662	0.204308	0.00435601	0.0018195
A	0	A0A0L8GCV4_A0A0L8GCV4_OCTBM	Ocbimv22035664m	Scaffold76907	71952	73231	+	0.851818	0	0.380228	0	0	0.0101394	0	0.245564	0.0826996	0.105196	0.176172	0	0
A	0	A0A0L8GCL4_A0A0L8GCL4_OCTBM	Ocbimv22035883m	Scaffold78392	124222	131219	+	0.844352	0.00137512	0	0	0.00559115	0	0.00921784	0.0525115	0.368714	0.301469	0.244424	0.00710227	0.00959562
A	1	A0A0L8I459_A0A0L8I459_OCTBM	Ocbimv22036037m	Scaffold7898	888120	889046	-	0.678392	0	0	0.125138	0.0679217	0.0767811	0.0402363	0.0889627	0.220377	0.199336	0.153931	0.0139166	0.0133998
A	0	A0A0L8GBV8_A0A0L8GBV8_OCTBM	Ocbimv22036102m	Scaffold79076	888384	926473	+	0.767945	0.0309408	0.0102708	0	0.0207342	0.0184874	0.051354	0.177492	0.263189	0.281484	0.142507	0.00121003	0.00233019
A	0	A0A0L8I537_A0A0L8I537_OCTBM	Ocbimv22036231m	Scaffold7978	704264	705247	+	0.821534	0.0030558	0	0	0.000619555	0.00295506	0	0.317333	0.224987	0.109136	0.337481	0.00443259	0
B	3	A0A0L8GB41_A0A0L8GB41_OCTBM	Ocbimv22036511m	Scaffold81134	56098	69638	+	0.908082	0.0138005	0.000674224	0	0.00387679	0	0.00914416	0.040032	0.294973	0.100291	0.49724	0.0269689	0.0129999
A	2	A0A0L8GBC8_A0A0L8GBC8_OCTBM	Ocbimv22036540m	Scaffold81197	65162	109166	-	0.645349	0.153518	0	0	0.0211137	0.00884013	0.10695	0.0887959	0.101819	0.0903745	0.204033	0.0682742	0.156281
A	0	A0A0L8GBB9_A0A0L8GBB9_OCTBM	Ocbimv22036558m	Scaffold81255	310616	311596	+	0.774757	0	0	0	0	0	0	0.276103	0.287549	0.257956	0.178392	0	0
B	0	A0A0L8I3C4_A0A0L8I3C4_OCTBM	Ocbimv22036699m	Scaffold8195	283996	322733	+	0.699168	0.15128	0.02452	0.0308689	0.0121067	0.0700571	0.160256	0.105305	0.0880093	0.232064	0.0851632	0.0165072	0.0238632
A	0	A0A0L8GAM8_A0A0L8GAM8_OCTBM	Ocbimv22036834m	Scaffold82470	943	50384	-	0.845325	0.0158335	0	0.00967431	0.0160513	0.0293651	0.0151803	0.370175	0.129094	0.0961209	0.244502	0.0158335	0.0581703
C	0	A0A0L8I333_A0A0L8I333_OCTBM	Ocbimv22036863m	Scaffold8256	897893	926324	+	0.82537	0.0234491	0	0	0.00865273	0	0.0127798	0.125453	0.2767	0.206352	0.342357	0	0.00425602
A	0	A0A0L8GAN2_A0A0L8GAN2_OCTBM	Ocbimv22037101m	Scaffold83406	33761	34795	+	0.931048	0	0.0447115	0	0	0	0.568674	0	0	0.333939	0	0.0526757	0
A	0	A0A0L8I2Q1_A0A0L8I2Q1_OCTBM	Ocbimv22037185m	Scaffold8420	95618	98205	+	0.684847	0.00719378	0.00131529	0.0646947	0.00302896	0.00395082	0.15902	0.22388	0.166264	0.190956	0.158691	0.00372035	0.0172848
A	0	A0A0L8I3R6_A0A0L8I3R6_OCTBM	Ocbimv22037397m	Scaffold8525	1419190	1519355	-	0.792748	0.0121607	0.00422101	0	0.000978146	0.000845964	0.0140994	0.292563	0.165668	0.201798	0.3049	0.0011632	0.00160381
A	0	A0A0L8G9D3_A0A0L8G9D3_OCTBM	Ocbimv22037598m	Scaffold86319	597954	602538	+	0.999904	0.000512495	8.72332e-06	2.05361e-05	2.41345e-05	5.34303e-05	0.998944	0.000154475	9.05044e-05	2.1881e-05	0.000121036	2.05361e-05	2.83508e-05
F	0	A0A0L8IGT0_A0A0L8IGT0_OCTBM	Ocbimv22037630m	Scaffold864	852077	854168	-	0.637587	0.1587	0.00461193	0.0361164	0.0096663	0.143792	0.0793502	0.0827166	0.0490528	0.0349141	0.139945	0.20054	0.0605947
A	0	A0A0L8G834_A0A0L8G834_OCTBM	Ocbimv22038287m	Scaffold89344	319339	323586	+	0.92859	0	0	0	0.439936	0.560064	0	0	0	0	0	0	0
A	0	A0A0L8G825_A0A0L8G825_OCTBM	Ocbimv22038309m	Scaffold89515	233533	256080	-	0.841119	0.0035516	0	0	0	0	0	0.363941	0.201485	0.345403	0.078545	0	0.00707393
A	0	A0A0L8I1Y4_A0A0L8I1Y4_OCTBM	Ocbimv22038378m	Scaffold8992	228834	272162	-	0.824919	0.124962	0	0	0.0366189	0.00244126	0.132438	0.0897162	0.125877	0.0523345	0.046689	0.341776	0.0471468
A	0	A0A0L8G7R3_A0A0L8G7R3_OCTBM	Ocbimv22038642m	Scaffold92418	375670	377337	+	0.910813	0.0228249	0	0.00354288	0.0289074	0	0.300988	0.0603229	0.504781	0.0201913	0.0470293	0	0.0114124
A	0	A0A0L8G776_A0A0L8G776_OCTBM	Ocbimv22038693m	Scaffold92680	269424	270831	+	0.905572	0.00181855	0.00046319	0	4.84244e-05	0	0.490508	0.222384	0.0713208	0.0713208	0.141063	0.000644782	0.000428977
F	0	A0A0L8I188_A0A0L8I188_OCTBM	Ocbimv22039182m	Scaffold9540	410003	411712	+	1	0	1	0	0	0	0	0	0	0	0	0	0
B	0	A0A0L8G7N4_A0A0L8G7N4_OCTBM	Ocbimv22039241m	Scaffold95727	285564	325099	-	0.932148	7.38111e-05	0.01898	0	0.000448139	0	5.49528e-05	0	0	2.10889e-05	0	0.572616	0.407806
A	0	A0A0L8G5L6_A0A0L8G5L6_OCTBM	Ocbimv22039603m	Scaffold97987	47010	69612	-	0.962684	0.00166497	0.000731853	0	0	0.00658668	0	0.708983	0.0800465	0.0887372	0.110693	0.00172443	0.000832483
A	0	A0A0L8I0W0_A0A0L8I0W0_OCTBM	Ocbimv22039649m	Scaffold9805	100127	101038	-	0.778893	0	0	0.0775178	0.0110931	0	0	0.0625489	0.269976	0.258616	0.29136	0.026463	0.00242577
A	1	A0A0L8G5R8_A0A0L8G5R8_OCTBM	Ocbimv22039826m	Scaffold99103	1895	10259	-	0.722128	0.140064	0.000447271	0.0021103	0.0293201	0.0431397	0.0313743	0.195156	0.143799	0.106449	0.246513	0.0455675	0.0160607
A	0	A0A0L8I0D0_A0A0L8I0D0_OCTBM	Ocbimv22039887m	Scaffold9944	598532	599659	-	0.846079	0.0253874	0	0.0131394	0.0465113	0.074418	0.0115503	0.125193	0.371315	0.225192	0.106588	0	0.000705421

## Sheet: Cminor
					Proportion of expression
Class	Group	Tree_ID	Gene_ID	Tau	Sp_sac	Testes	Ovary	Bucc_mass	Stomach	Liver	Kidney	Cec_int	Heart	BH	Gills	Siphon	Psg	Eye	Brain	Suckers	Arms	Skin
A	0	Omin000305p_OCMIN	Omin000305t	0.99981	0	7.78473e-05	0.000324364	0.000116771	0.000194618	0.000207593	0.000635753	0.000272465	0.000103796	0.000246516	0.000103796	0	3.89236e-05	0.996782	0.000415185	9.08218e-05	0.000129745	0.000259491
C	0	Omin000340p_OCMIN	Omin000340t	0.974175	0	0	0	0	0.305085	0	0.694915	0	0	0	0	0	0	0	0	0	0	0
B	3	Omin000461p_OCMIN	Omin000461t	0.666453	0.0134746	0.0010726	0.0267033	0.0294072	0.0425018	0.00210051	0.0402226	0.0526022	0.0975397	0.0750151	0.118433	0.100981	0.0500101	0.0436862	0.0200889	0.0649371	0.0713057	0.149918
A	0	Omin000477p_OCMIN	Omin000477t	0.728783	0.0285714	0.00544218	0.12381	0.0503401	0.062585	0.0394558	0.0353742	0.0353742	0.0217687	0.0326531	0.0380952	0.122449	0.00544218	0.0380952	0.106122	0.0163265	0.178231	0.0598639
A	0	Omin000492p_OCMIN	Omin000492t	0.963637	0.617984	0	0.00474957	0	0.00323834	0.00107945	0	0.0104706	0.00399396	0	0	0	0.000755613	0.00151123	0.354491	0	0.00172712	0
A	0	Omin000559p_OCMIN	Omin000559t	0.763569	0.0189675	0.0216771	0.0420707	0.0213919	0.0916999	0.0022818	0.0248146	0.0336566	0.19923	0.177125	0.0472048	0.033514	0.0743012	0.0705933	0.0489161	0.0270964	0.0216771	0.0437821
A	0	Omin000590p_OCMIN	Omin000590t	0.988641	0.0254335	0	0.0138728	0	0.0265896	0	0	0.0150289	0.0150289	0.0138728	0.0369942	0	0	0	0.83815	0	0.0150289	0
B	0	Omin000854p_OCMIN	Omin000854t	0.918496	0.00231961	0.000662745	0.126502	0.00778726	0.000745589	0.00712451	0.0481319	0.004225	0.0839201	0.0867368	0.419186	0.015326	0.0416701	0.00405932	0.1352	0.00140833	0.00869853	0.00629608
A	0	Omin000855p_OCMIN	Omin000855t	0.949966	0.0869565	0	0.273292	0	0	0	0	0	0	0	0	0	0	0	0.540373	0	0.0993789	0
A	0	Omin000946p_OCMIN	Omin000946t	0.96057	0.0475986	0	0.0166004	0.000698399	0.0013968	0.00177286	0	0.151391	0.000752122	0.00220264	0.598689	0.0688729	0	0.0254647	0.0690878	0.00553347	0.00596325	0.0039755
A	0	Omin001026p_OCMIN	Omin001026t	0.899498	0.0696824	0	0.0180489	0.017592	0.00228467	0.0130226	0.00753941	0.0155358	0.0315284	0.0262737	0.369203	0.0315284	0.00319854	0.0164496	0.260909	0.0383825	0.0121087	0.0667124
A	0	Omin001286p_OCMIN	Omin001286t	0.952672	0.554145	0	0.021164	0.0102293	0.0250441	0.0137566	0.00388007	0.0447972	0	0	0	0.0116402	0.00670194	0	0.2903	0	0.0116402	0.00670194
B	0	Omin001309p_OCMIN	Omin001309t	0.973435	0	0	0	0	0	0	0	0	0.186667	0.0622222	0	0	0	0	0.688889	0	0.0622222	0
A	0	Omin001808p_OCMIN	Omin001808t	0.958246	0.00620104	0.109334	0.0456919	0.0287206	0	0	0	0	0.0636423	0.00359008	0.00293734	0.0283943	0.00163185	0.0212141	0.584856	0.0633159	0.0248042	0.0156658
A	1	Omin002218p_OCMIN	Omin002218t	0.959865	0.00565262	0	0.0945529	0.00809353	0.0276208	0.00847893	0.00269784	0.0165725	0.0465057	0.0547276	0.0398253	0.01426	0.0228674	0.594424	0.0267215	0.00950668	0.0102775	0.0172148
A	0	Omin002313p_OCMIN	Omin002313t	0.976115	0	0.711214	0.00697269	0.0180128	0	0	0	0	0.0110401	0	0	0.0383498	0.00639163	0.00581058	0.0923881	0.0185938	0.0499709	0.0412551
A	1	Omin002374p_OCMIN	Omin002374t	0.636949	0	0	0.00762527	0.0223312	0.0332244	0.0283224	0.046841	0.120915	0.1378	0.00816993	0.132898	0.139434	0.0255991	0.0517429	0.0767974	0.0740741	0.0152505	0.078976
A	1	Omin002376p_OCMIN	Omin002376t	0.887696	0.00491871	0	0.00963032	0.0152739	0.0171378	0.00476338	0.0226778	0.0495495	0.0376929	0.111577	0.34374	0.0241276	0.268769	0.0355183	0.0132546	0.0186393	0.00564357	0.0170861
A	1	Omin002377p_OCMIN	Omin002377t	0.876664	0.0218613	0	0	0.0181137	0.0374766	0.00312305	0.0106184	0.0643348	0.065584	0.124922	0.322923	0.0505934	0.129294	0.0343535	0.0137414	0.0424735	0.0202998	0.0402873
A	1	Omin002380p_OCMIN	Omin002380t	0.881584	0.00759219	0	0.00759219	0	0.0140998	0.0791757	0.0422993	0.218004	0.0119306	0.00759219	0.331887	0.185466	0	0.0195228	0.0151844	0.0238612	0.0184382	0.0173536
B	0	Omin002402p_OCMIN	Omin002402t	0.992129	0.000749181	0.000842828	0.00288747	0.00309037	0.00210707	0.0011862	0.000889652	0.00212268	0.00624317	0.881988	0.00121742	0.000858436	0.00465116	0.000717965	0.0852505	0.00090526	0.00227876	0.00201342
A	0	Omin002443p_OCMIN	Omin002443t	0.98366	0	0.169772	0	0	0	0	0	0	0	0	0.047619	0	0	0	0.782609	0	0	0
B	0	Omin003211p_OCMIN	Omin003211t	1	0	0	0	0	0	0	0	0	0	0	0	0	0	0	1	0	0	0
A	0	Omin003378p_OCMIN	Omin003378t	0.929464	0.00886716	0.127322	0.0232792	0.00914791	0.00542792	0.00844602	0.198797	0.0211034	0.0073698	0.454728	0.00542792	0.0215947	0.000889055	0.00605961	0.00210566	0.0187637	0.016003	0.0646671
A	0	Omin003386p_OCMIN	Omin003386t	0.838533	0	0	0.0528326	0.0439211	0.122533	0.00795671	0.0184596	0.120942	0.254933	0.013049	0.00763845	0.0133673	0.267027	0.00763845	0.0614258	0	0.00445576	0.00381922
B	0	Omin003541p_OCMIN	Omin003541t	0.97483	0.0182119	0.0215232	0.0198676	0	0	0	0.177152	0	0.0629139	0	0	0	0	0	0.700331	0	0	0
A	0	Omin003767p_OCMIN	Omin003767t	0.886555	0	0.341463	0.317073	0	0	0	0	0	0	0	0	0	0	0	0	0	0.341463	0
A	0	Omin004141p_OCMIN	Omin004141t	0.984004	0.786211	0.00129738	0.0481883	0.00231674	0	0.000741359	0	0	0.00129738	0	0	0.00129738	0	0.00111204	0.157539	0	0	0
A	0	Omin004375p_OCMIN	Omin004375t	0.987291	0	0	0.00582524	0.0213592	0	0.0106796	0	0	0.0174757	0.00582524	0.00485437	0.0242718	0.00291262	0.0203883	0.82233	0.00582524	0.00582524	0.0524272
C	0	Omin004858p_OCMIN	Omin004858t	0.994289	0	0	0	0	0	0	0	0	0	0	0	0	0	0.911502	0.0884978	0	0	0
A	0	Omin005064p_OCMIN	Omin005064t	0.744027	0.0627126	0.013818	0.138393	0.0724915	0.0590986	0.0361395	0.0550595	0.0501701	0.0497449	0.057398	0.0355017	0.0303997	0.0085034	0.0682398	0.186862	0.017432	0.0359269	0.0221088
A	0	Omin005135p_OCMIN	Omin005135t	0.993125	0.00596303	0	0.0164977	0.0408468	0.00506857	0	0.00288213	0.00586364	0	0.00139137	0.00347843	0.00139137	0	0.0116279	0.895349	0	0.00964023	0
A	0	Omin005472p_OCMIN	Omin005472t	0.827474	0.0911952	0.00371601	0.0422751	0.123197	0.254262	0.0255749	0.0111043	0.0820582	0.0207222	0.0293346	0.0240885	0.0409198	0.0173997	0.0239573	0.120792	0.0190609	0.0472589	0.023083
A	0	Omin005786p_OCMIN	Omin005786t	0.787892	0.0198098	0	0	0.0206022	0.153724	0	0	0.0316957	0.180666	0.0372425	0.167195	0.0982567	0.0103011	0.0316957	0.217116	0.0316957	0	0
A	0	Omin005808p_OCMIN	Omin005808t	0.99693	0	0	0	0	0	0	0	0.0157835	0	0	0	0	0.0191657	0	0.950395	0	0.0146561	0
A	0	Omin005897p_OCMIN	Omin005897t	0.884235	0.0916442	0.336927	0.0242588	0	0	0.0161725	0	0	0	0.0269542	0.0215633	0	0.0107817	0.0215633	0.285714	0.0269542	0	0.137466
A	0	Omin006022p_OCMIN	Omin006022t	0.943804	0.126614	0	0.031281	0	0	0	0	0.0238332	0.0322741	0	0.0978153	0.0506455	0.00695134	0.0367428	0.51142	0.0203575	0.0173784	0.0446872
A	0	Omin006056p_OCMIN	Omin006056t	0.853541	0.037575	0.0101042	0.0446795	0.0230502	0.0588885	0.00599937	0.0211557	0.0162614	0.286549	0.105147	0.0672561	0.071203	0.00899905	0.019419	0.132775	0.0187875	0.0339438	0.0382065
A	2	Omin006236p_OCMIN	Omin006236t	0.999952	0.0005113	0.999182	0	0	0	0	0	0	0	0	0	0	0	0	0	0	0.00030678	0
A	2	Omin006237p_OCMIN	Omin006237t	1	0	1	0	0	0	0	0	0	0	0	0	0	0	0	0	0	0	0
A	0	Omin006346p_OCMIN	Omin006346t	0.921628	0	0	0.0237481	0.0348477	0.0720186	0.0074858	0.00335571	0.0271038	0.428756	0.00309757	0.165462	0.080795	0.00283944	0.074858	0.0487868	0.00671141	0	0.0201342
C	0	Omin006512p_OCMIN	Omin006512t	0.993637	0.902394	0.0614362	0.00345745	0.0018617	0	0	0.00398936	0	0	0	0	0	0.000797872	0.00159574	0.018617	0.00398936	0.0018617	0
C	0	Omin006515p_OCMIN	Omin006515t	0.935584	0	0.00588235	0	0.477311	0.115126	0	0	0.194958	0.0176471	0.00588235	0.0403361	0	0.00252101	0.010084	0.114286	0	0.00588235	0.010084
A	0	Omin006755p_OCMIN	Omin006755t	0.998991	0	0	0	0	0	0	0	0	0	0	0.0168634	0	0	0	0.983137	0	0	0
A	1	Omin006947p_OCMIN	Omin006947t	0.945727	0.00962725	0	0.00172797	0.00172797	0.00172797	0.0108615	0.0654159	0.205628	0.00172797	0.00370279	0.520118	0.0826956	0.000740558	0.00789928	0.00765243	0.0195014	0.00543076	0.0538139
A	0	Omin007110p_OCMIN	Omin007110t	0.913022	0	0	0	0.062069	0.403448	0.0402299	0	0.0724138	0	0.0448276	0	0	0	0	0.377011	0	0	0
B	4	Omin007145p_OCMIN	Omin007145t	0.924597	0.00118315	0	0.00709891	0.0385708	0.438239	0.0449598	0.023663	0.0993848	0.071699	0.00875532	0.0830573	0.0125414	0.0156176	0.0858968	0.00354946	0.037151	0.0175106	0.0111216
B	4	Omin007146p_OCMIN	Omin007146t	0.818755	0.0111376	0.0540971	0.0365951	0.0373906	0.162291	0.00875099	0.0246619	0.0103421	0.0676213	0.0103421	0.0676213	0.0851233	0	0.0453461	0.0103421	0.0461416	0.0771679	0.245028
C	0	Omin007290p_OCMIN	Omin007290t	0.969109	0.0356532	0.00744811	0.00915751	0.00671551	0.0449328	0	0	0.0105006	0.0123321	0.655678	0.0106227	0.00500611	0.0103785	0.0338217	0.134921	0.0105006	0.002442	0.00989011
A	0	Omin007385p_OCMIN	Omin007385t	0.990793	0	0.864662	0.0350877	0	0	0	0	0	0	0	0	0	0	0	0.100251	0	0	0
A	0	Omin007407p_OCMIN	Omin007407t	0.999042	0	0	0.00255961	0.00255961	0	0	0	0.00148188	0.00134716	0	0.0024249	0	0	0	0.983969	0	0.00565809	0
A	0	Omin007486p_OCMIN	Omin007486t	0.999953	2.60269e-05	3.94602e-05	0.000245157	4.44977e-05	9.23536e-06	5.87705e-06	0	0.000204018	5.03747e-06	0	0	2.43478e-05	2.1829e-05	0.999209	0.000101589	3.10644e-05	2.43478e-05	8.39578e-06
A	0	Omin007510p_OCMIN	Omin007510t	0.846829	0.156866	0.0032829	0.0149872	0.00442478	0.00157008	0.277476	0.0475307	0.0483871	0	0.00157008	0.0111333	0.0145589	0.025835	0.200257	0.0916357	0.0822152	0.00970597	0.00856409
A	0	Omin007596p_OCMIN	Omin007596t	0.980661	0.0604622	0	0.0354932	0.0173339	0	0	0	0	0.00247627	0.00226991	0.0674783	0.00949236	0.00206356	0.012175	0.752579	0.0101114	0.00474618	0.0233182
A	0	Omin007634p_OCMIN	Omin007634t	0.990924	0.130333	0	0	0	0	0	0	0.00333333	0	0	0	0	0	0.866333	0	0	0	0
C	0	Omin007954p_OCMIN	Omin007954t	0.993091	0	0	0.00182788	0.00167555	0	0	0	0	0	0	0	0	0	0.894897	0.100685	0	0	0.000913938
A	0	Omin008247p_OCMIN	Omin008247t	0.924789	0.0925795	0.0961131	0.0628975	0.0261484	0.0176678	0	0	0.0204947	0	0	0.00848057	0.0388693	0.00424028	0.0332155	0.438869	0.112367	0.0480565	0
A	0	Omin008460p_OCMIN	Omin008460t	0.882951	0.00508966	0.000448312	0.0024789	0.00366561	0.000843882	0.000263713	0.00516878	0.00334916	0.00672468	0.0199103	0.168671	0.211999	0.0242352	0.0248154	0.00123945	0.132753	0.0538766	0.334467
A	0	Omin008461p_OCMIN	Omin008461t	0.967001	0	0	0	0	0	0	0	0.25	0	0	0	0	0.109375	0	0.640625	0	0	0
A	0	Omin008483p_OCMIN	Omin008483t	0.923594	0.00630793	0	0.00836766	0.00321833	0.0453141	0	0	0.430355	0.00720906	0.00180227	0	0.00180227	0.0191813	0.0046344	0.43499	0.003862	0.00901133	0.0239444
A	0	Omin008899p_OCMIN	Omin008899t	0.899458	0.011131	0	0.0164977	0.0119261	0.369112	0	0	0.0262373	0.181674	0	0.0228583	0.0793083	0.0129199	0	0.224806	0	0.0180879	0.0254423
A	0	Omin009180p_OCMIN	Omin009180t	0.787892	0.0198098	0	0	0.0206022	0.153724	0	0	0.0316957	0.180666	0.0372425	0.167195	0.0982567	0.0103011	0.0316957	0.217116	0.0316957	0	0
C	0	Omin009318p_OCMIN	Omin009318t	0.996869	0	0	0	0.0505415	0	0	0	0	0	0	0	0	0	0	0.949458	0	0	0
A	1	Omin009324p_OCMIN	Omin009324t	0.948594	0.00872523	0	0.0164892	0	0.00606329	0.0172286	0.0314996	0.0617421	0.0423691	0.082446	0.533644	0.0323869	0.0582668	0.0332002	0.0245489	0.00591541	0.0178202	0.0276545
A	1	Omin009421p_OCMIN	Omin009421t	0.856038	0.0146867	0.037008	0.0270428	0.0241898	0.0516344	0.0237679	0.0427943	0.0791996	0.0613184	0.0866735	0.290077	0.0692946	0.0244309	0.0136018	0.0251542	0.0299158	0.0413075	0.0579029
B	0	Omin009484p_OCMIN	Omin009484t	0.921178	0.00357818	0.0450311	0.00162031	0.005266	0.00270051	0	0.00121523	0	0	0.00175533	0.158048	0.164799	0	0.0099919	0	0.129962	0.0486767	0.427356
A	0	Omin009569p_OCMIN	Omin009569t	0.95907	0.00672646	0.0213004	0.0134529	0	0	0	0	0.00784753	0.121076	0.0414798	0.589686	0	0.123318	0	0.0683857	0	0	0.00672646
B	0	Omin009873p_OCMIN	Omin009873t	0.993783	0	0.904412	0	0	0	0	0	0	0	0	0	0	0	0	0.0955882	0	0	0
C	0	Omin010543p_OCMIN	Omin010543t	0.93877	0.00028751	4.53963e-05	0.0141384	0.0192632	0.0428945	0	0.000196717	0.00920032	0.00123074	4.53963e-05	8.07046e-05	0.165399	0.000968455	0.000685989	6.55724e-05	0.196924	0.0585965	0.489978
B	0	Omin010849p_OCMIN	Omin010849t	0.962526	0	0	0.00885691	0.0262939	0.0354276	0.0453916	0.0398561	0.0304456	0.61085	0.0282314	0	0.0384722	0	0	0.0393025	0.0102408	0.0190977	0.0675339
A	0	Omin010884p_OCMIN	Omin010884t	0.829132	0	0	0.0731707	0	0	0.134146	0	0	0.219512	0.0731707	0.0609756	0	0.0365854	0.256098	0	0.0731707	0.0731707	0
A	0	Omin010920p_OCMIN	Omin010920t	0.781788	0.136481	0.00696594	0.0546956	0.0441176	0.168215	0.00619195	0.0219298	0.0668215	0.212332	0.0309598	0.0296698	0.0348297	0.0185759	0.0265738	0.0144479	0.0183179	0.0348297	0.0740454
A	0	Omin011357p_OCMIN	Omin011357t	0.996537	0.944398	0	0.00683717	0.00383461	0.0014832	0	0.0127338	0.00564338	0.00264081	0.00365373	0.000470282	0.00213436	0	0.00224288	0.00803097	0.00166407	0	0.00423254
A	0	Omin011558p_OCMIN	Omin011558t	0.73749	0.0149794	0.00156036	0.0247784	0.0344526	0.0538946	0.00171639	0.0151042	0.0525527	0.097803	0.083791	0.174073	0.0812945	0.183061	0.0469355	0.00976782	0.0293347	0.0369492	0.0579516
A	0	Omin011675p_OCMIN	Omin011675t	0.953153	0	0.0752257	0.0140421	0.0140421	0.0842528	0	0.0320963	0	0.0912738	0	0.55667	0.0762287	0	0.0130391	0	0.0160481	0	0.0270812
A	0	Omin011696p_OCMIN	Omin011696t	0.985171	0	0	0	0	0	0	0	0	0	0	0	0	0	0	0.798658	0.0738255	0	0.127517
B	4	Omin011707p_OCMIN	Omin011707t	0.929241	0	0.0986842	0.453947	0	0	0	0	0	0	0	0.0855263	0.0460526	0	0	0.269737	0	0.0460526	0
B	4	Omin011708p_OCMIN	Omin011708t	0.986425	0	0	0.8125	0	0	0	0	0	0	0	0	0	0	0	0	0	0	0.1875
B	4	Omin011709p_OCMIN	Omin011709t	0.985294	0	0	0.2	0	0	0	0	0	0	0	0	0	0	0	0.8	0	0	0
B	4	Omin011712p_OCMIN	Omin011712t	NA	NA	NA	NA	NA	NA	NA	NA	NA	NA	NA	NA	NA	NA	NA	NA	NA	NA	NA
A	0	Omin011846p_OCMIN	Omin011846t	0.994054	0.00325262	0	0.0177087	0.00325262	0	0	0.00795085	0.00397543	0.00397543	0.00361402	0.908204	0.00758945	0	0.00325262	0.0263824	0	0.00758945	0.00325262
A	0	Omin011853p_OCMIN	Omin011853t	0.967422	0.0964286	0	0.0257143	0	0.0385714	0	0.0142857	0	0.0235714	0	0.0828571	0.055	0.00642857	0	0.643571	0	0.0135714	0
A	0	Omin012302p_OCMIN	Omin012302t	0.9341	0	0	0.0106383	0	0	0	0	0	0.0398936	0.016844	0.394947	0.00576241	0.00753546	0	0.471631	0	0.0172872	0.035461
A	0	Omin012548p_OCMIN	Omin012548t	0.773	0.0124075	0.127747	0.0264732	0.0275096	0.0265324	0.0041753	0.0279242	0.101451	0.0758662	0.0900207	0.205804	0.0347054	0.0932781	0.0440924	0.0418419	0.0248149	0.0187741	0.0165828
B	3	Omin012674p_OCMIN	Omin012674t	0.771883	0.013697	0.00515464	0.0386963	0.0184282	0.0356371	0.00713326	0.120141	0.0337242	0.0527511	0.0874025	0.205003	0.0556643	0.0324173	0.039587	0.123755	0.0329065	0.0471438	0.0507579
C	0	Omin012713p_OCMIN	Omin012713t	0.844506	0.00351509	0.000125539	0.014144	0.0977529	0.120141	0.00100431	0.00556555	0.0131397	0.148429	0.00979202	0.0279533	0.0545675	0.0170314	0.0572457	0.27447	0.0303804	0.0656568	0.0590869
A	0	Omin013017p_OCMIN	Omin013017t	0.934908	0.474708	0	0.00944969	0.139522	0.0277932	0.00277932	0	0.00555864	0.0150083	0.00500278	0.0127849	0.0150083	0.00444692	0.0211228	0.247916	0.00500278	0.00500278	0.00889383
B	3	Omin013104p_OCMIN	Omin013104t	0.850046	0.00583942	0.0437956	0.0218978	0.010219	0.010219	0	0.00729927	0.0569343	0.029927	0.0328467	0.281752	0.0474453	0.00583942	0.0255474	0.122628	0.0518248	0.0766423	0.169343
B	4	Omin013821p_OCMIN	Omin013821t	0.966817	0	0	0	0.180328	0	0	0	0.639344	0	0	0	0	0	0.180328	0	0	0	0
B	4	Omin013822p_OCMIN	Omin013822t	0.945701	0	0	0	0	0.12	0	0	0.52	0	0	0.12	0	0	0	0	0.12	0	0.12
A	0	Omin014148p_OCMIN	Omin014148t	0.845707	0.0310914	0	0.0203046	0.0361675	0.0374365	0.00507614	0.135152	0.0329949	0.173223	0.276015	0.0418782	0.0532995	0.0196701	0.00761421	0.018401	0.0234772	0.0133249	0.0748731
A	0	Omin014273p_OCMIN	Omin014273t	0.926149	0.0334412	0	0.01726	0.00862999	0.264293	0	0	0	0.160734	0.00970874	0	0.0194175	0	0.0237325	0.443366	0.00970874	0.00970874	0
B	0	Omin014295p_OCMIN	Omin014295t	0.651283	0.0278059	0.00404449	0.100101	0.0361476	0.0743175	0.0237614	0.00429727	0.0341254	0.111982	0.0315976	0.0204752	0.144338	0.049545	0.0204752	0.0275531	0.122599	0.124115	0.0427199
B	0	Omin014708p_OCMIN	Omin014708t	0.972131	0	0.0469281	0	0	0.0147359	0.0469281	0.00816141	0.00838812	0.00793471	0.678531	0.0405804	0.0158694	0.0278848	0.0133757	0.032419	0.00838812	0.00793471	0.0419406
B	4	Omin014719p_OCMIN	Omin014719t	0.961938	0	0	0	0	0.190476	0	0	0	0.202381	0	0	0.607143	0	0	0	0	0	0
F	0	Omin014890p_OCMIN	Omin014890t	0.688057	0.0267094	0.0162927	0.158654	0.022703	0.111645	0.00534188	0.0128205	0.0400641	0.118056	0.0173611	0.0462073	0.0857372	0.0088141	0.0590278	0.0267094	0.0440705	0.0940171	0.105769
B	4	Omin014980p_OCMIN	Omin014980t	0.971901	0	0	0	0	0	0	0.0271903	0	0	0	0	0.172205	0	0	0	0.0513595	0.0725076	0.676737
A	1	Omin015297p_OCMIN	Omin015297t	0.951506	0.00478624	0.00748357	0.0171372	0.00870041	0.00695627	0.00243368	0.0447189	0.016549	0.0543117	0.131946	0.548126	0.0210716	0.0609637	0.0183337	0.00606393	0.0112761	0.0129594	0.0261824
A	1	Omin015298p_OCMIN	Omin015298t	0.948521	0.00345175	0.000862937	0.00920466	0.0143823	0.0148137	0.00244499	0.0332231	0.0254566	0.0963613	0.063282	0.533295	0.0798217	0.021142	0.0260319	0.0222925	0.00834172	0.0188408	0.026751
A	0	Omin015625p_OCMIN	Omin015625t	0.946884	0.525496	0	0.00489455	0.349115	0	0	0	0.000978909	0	0	0	0.00115689	0.0381774	0.00338169	0.0363976	0.0129928	0.00729732	0.0201121
A	0	Omin015687p_OCMIN	Omin015687t	0.945378	0	0	0	0	0	0	0	0	0	0.481481	0	0	0	0	0	0.518519	0	0
A	0	Omin015932p_OCMIN	Omin015932t	0.886697	0	0.341746	0	0.147213	0	0	0	0	0	0	0	0	0.0893796	0	0.277603	0.0431125	0.100946	0
A	0	Omin016287p_OCMIN	Omin016287t	0.853197	0	0.0447761	0.0422886	0	0	0	0	0	0	0	0	0.134328	0.0895522	0	0.216418	0.141791	0.0447761	0.28607
A	0	Omin016320p_OCMIN	Omin016320t	0.851118	0.0111176	0.00643651	0.0743125	0.0231129	0.0178467	0.00204798	0.0201872	0.0102399	0.157109	0.0315974	0.0245758	0.0289643	0.016969	0.019017	0.283207	0.101521	0.0608543	0.110884
A	0	Omin016403p_OCMIN	Omin016403t	NA	NA	NA	NA	NA	NA	NA	NA	NA	NA	NA	NA	NA	NA	NA	NA	NA	NA	NA
A	0	Omin016491p_OCMIN	Omin016491t	1	0	0	0	0	0	0	0	0	0	0	0	0	0	0	1	0	0	0
B	4	Omin016854p_OCMIN	Omin016854t	NA	NA	NA	NA	NA	NA	NA	NA	NA	NA	NA	NA	NA	NA	NA	NA	NA	NA	NA
B	3	Omin016961p_OCMIN	Omin016961t	0.877828	0	0	0	0.183333	0.0625	0	0.1	0.1	0	0.325	0.175	0	0.0541667	0	0	0	0	0
A	0	Omin017562p_OCMIN	Omin017562t	0.908418	0.108258	0	0.0376551	0.0342319	0.0102696	0	0	0.0329482	0.00941378	0.0158323	0.0830124	0.0393667	0	0.0124091	0.3911	0.0530595	0.0363714	0.136072
A	0	Omin017857p_OCMIN	Omin017857t	0.965398	0	0.016016	0.0750751	0.015015	0	0.039039	0.0510511	0	0	0	0.0560561	0.033033	0.00700701	0	0.62963	0	0.049049	0.029029
A	0	Omin018072p_OCMIN	Omin018072t	0.987409	0.0223659	0.00524201	0.0125808	0.00838721	0	0.0031452	0	0.00663987	0	0.0010484	0.00891141	0	0	0.823694	0.0954045	0.00995981	0.002621	0
A	0	Omin018173p_OCMIN	Omin018173t	0.913779	0	0	0.0888889	0	0	0.172222	0	0.405556	0	0	0	0	0	0.0555556	0	0	0.277778	0
A	0	Omin018647p_OCMIN	Omin018647t	0.988447	0.00835282	0	0.00790734	0.00445484	0.0122508	0.00634815	0.00144782	0.0588039	0.0109144	0.00155919	0.00133645	0	0.0459962	0	0.835839	0	0.00478895	0
B	4	Omin019347p_OCMIN	Omin019347t	0.815981	0.00762463	0.00508309	0.0173998	0.0261975	0.0391007	0.00430107	0.0349951	0.0742913	0.200391	0.0301075	0.242229	0.0623656	0.0334311	0.0136852	0.00195503	0.0383187	0.055132	0.113392
B	4	Omin019348p_OCMIN	Omin019348t	0.852214	0.00343811	0.0265226	0.0180092	0.0394565	0.0273412	0.0242305	0.105435	0.0278324	0.12721	0.016372	0.164866	0.0109692	0.284709	0.0222659	0.00753111	0.0109692	0.0304519	0.0523903
B	4	Omin019349p_OCMIN	Omin019349t	0.825507	0.00479174	0.00552893	0.0254331	0.0272761	0.063767	0.0114265	0.0446001	0.0873572	0.252119	0.0320678	0.164394	0.0412827	0.0471802	0.0302248	0.00774051	0.0232215	0.0412827	0.0903059
B	4	Omin019350p_OCMIN	Omin019350t	0.84338	0.00649439	0.0322013	0.0227303	0.0338249	0.0432959	0.0234068	0.064538	0.0492491	0.118387	0.0319307	0.133811	0.0242186	0.273035	0.0132594	0.0115005	0.0204303	0.0243539	0.0733324
A	0	Omin019532p_OCMIN	Omin019532t	0.96531	0.629041	0	0	0.00521376	0	0	0	0.0205944	0.0271116	0	0	0	0	0	0.31804	0	0	0
A	1	Omin019885p_OCMIN	Omin019885t	0.993059	0	0.00277186	0.00298507	0	0.00724947	0	0.00319829	0	0	0.0200426	0.894456	0.0469083	0	0	0.0223881	0	0	0
A	0	Omin020123p_OCMIN	Omin020123t	0.95907	0.00672646	0.0213004	0.0134529	0	0	0	0	0.00784753	0.121076	0.0414798	0.589686	0	0.123318	0	0.0683857	0	0	0.00672646
A	0	Omin020127p_OCMIN	Omin020127t	0.986007	0.807832	0	0.00167832	0.133427	0.000839161	0.00111888	0.00727273	0	0	0.00111888	0	0.00223776	0.0145455	0	0.0128671	0.00223776	0.00195804	0.0128671
B	0	Omin020462p_OCMIN	Omin020462t	0.946078	0	0.152174	0.130435	0.521739	0	0	0	0	0	0	0	0	0	0	0.195652	0	0	0
B	3	Omin021526p_OCMIN	Omin021526t	0.815859	0	0.0208839	0.023798	0.0245265	0.0240408	0	0.0184556	0.0767363	0.0721224	0.124818	0.242108	0.00315687	0.0859641	0.044439	0.14813	0.00412822	0.0393395	0.0473531
B	3	Omin021598p_OCMIN	Omin021598t	0.824943	0	0	0	0	0	0.0385196	0.119335	0.111027	0.0641994	0.0679758	0.251511	0.081571	0.103474	0.0506042	0.0354985	0.0468278	0	0.0294562
A	0	Omin021725p_OCMIN	Omin021725t	0.923455	0.00679042	0.00683452	0.00952423	0.00537943	0.00480621	0.068257	0.0449314	0.162221	0.0220909	0.117598	0.434543	0.0260593	0.0147714	0.012258	0.00493849	0.0163587	0.0116848	0.0309537
B	4	Omin021765p_OCMIN	Omin021765t	NA	NA	NA	NA	NA	NA	NA	NA	NA	NA	NA	NA	NA	NA	NA	NA	NA	NA	NA
A	0	Omin021798p_OCMIN	Omin021798t	0.88641	0	0.109804	0	0	0	0	0	0.0588235	0	0	0	0.109804	0.0862745	0.188235	0.341176	0	0	0.105882
B	0	Omin021885p_OCMIN	Omin021885t	0.930404	0.0179206	0.0536073	0.0273444	0.0472733	0.458057	0	0.00401668	0.0135949	0.250888	0.0012359	0.00108142	0.0335239	0.0197744	0.00988722	0.00169937	0.0162212	0.0370771	0.00679747
A	0	Omin021903p_OCMIN	Omin021903t	0.995194	0	0.0362538	0.0181269	0.00906344	0	0	0	0	0	0	0	0	0.00302115	0	0.924471	0.00906344	0	0
A	2	Omin021998p_OCMIN	Omin021998t	0.840209	0.0161883	0.00154789	0.0861013	0.0188971	0.0345695	0.00322477	0.0194776	0.00741696	0.0867462	0.0321187	0.269074	0.0574008	0.00651403	0.105643	0.0704934	0.0368268	0.048049	0.0997098
A	0	Omin022883p_OCMIN	Omin022883t	0.882353	0.277778	0	0.333333	0.166667	0	0	0	0	0	0	0	0	0.0555556	0	0	0.166667	0	0
F	0	Omin022928p_OCMIN	Omin022928t	0.69531	0	0.0529456	0.0115585	0.064877	0.0376585	0.059657	0.0320656	0.11223	0.158837	0.00372856	0.00820283	0.16182	0.0372856	0.149142	0.0208799	0.0167785	0.0641312	0.00820283
A	0	Omin023142p_OCMIN	Omin023142t	0.984425	0.0242991	0	0.0261682	0.0130841	0.0261682	0	0	0.0448598	0	0	0.0242991	0	0	0.0233645	0.790654	0.0149533	0	0.0121495
A	0	Omin023455p_OCMIN	Omin023455t	1	0	0	0	0	0	0	0	0	0	0	0	0	0	0	1	0	0	0
B	3	Omin023463p_OCMIN	Omin023463t	0.799177	0.0123301	0.00554138	0.0363666	0.017759	0.0325224	0.00636441	0.117719	0.0344803	0.0468308	0.0844908	0.226553	0.0523006	0.0318578	0.039306	0.129829	0.030084	0.0469689	0.0486967
A	0	Omin023618p_OCMIN	Omin023618t	NA	NA	NA	NA	NA	NA	NA	NA	NA	NA	NA	NA	NA	NA	NA	NA	NA	NA	NA
B	4	Omin024271p_OCMIN	Omin024271t	0.902587	0.0125683	0.0229508	0.0333333	0	0.0666667	0	0	0	0.089071	0.0349727	0.0415301	0.148087	0	0.0284153	0	0.0863388	0.0595628	0.376503
A	1	Omin024374p_OCMIN	Omin024374t	0.963979	0	0.0557491	0	0.620209	0.324042	0	0	0	0	0	0	0	0	0	0	0	0	0
C	0	Omin024401p_OCMIN	Omin024401t	0.932526	0	0	0.0570776	0.0570776	0	0	0	0.465753	0.0936073	0	0.294521	0	0	0	0	0	0.0319635	0
B	3	Omin024607p_OCMIN	Omin024607t	0.930307	0	0.457711	0.0373134	0	0	0	0	0.0348259	0	0	0.0373134	0	0	0	0.328358	0.0646766	0.0199005	0.0199005
A	2	Omin024615p_OCMIN	Omin024615t	0.997781	0.000611995	0.963647	0.000673195	0.000673195	0	0	0.00152999	0	0.000734394	0.000734394	0.0283354	0.000734394	0.00159119	0	0	0	0.000734394	0
C	0	Omin024726p_OCMIN	Omin024726t	0.816078	0.00241346	0	0.0138774	0.11215	0.131835	0.000905046	0.00407271	0.0128969	0.153782	0.0103326	0.0237574	0.0536994	0.0159891	0.0557357	0.242326	0.036956	0.0671242	0.0621465
A	0	Omin025149p_OCMIN	Omin025149t	0.878636	0.036129	0.0154987	0.0239996	0.0659859	0.117769	0.00409496	0.00243624	0.0441634	0.326457	0.00736056	0.00295459	0.0910222	0.00176239	0.059351	0.0921107	0.0243106	0.0477918	0.0368028
B	3	Omin025385p_OCMIN	Omin025385t	0.845598	0.00446761	0	0.0342517	0.00781832	0.0178704	0.00707372	0.0584512	0.149665	0.0376024	0.128071	0.275875	0.0405808	0.0670141	0.018615	0.0290395	0.0480268	0.0390916	0.0364855
B	4	Omin025411p_OCMIN	Omin025411t	0.984163	0	0.212121	0.787879	0	0	0	0	0	0	0	0	0	0	0	0	0	0	0
A	1	Omin025510p_OCMIN	Omin025510t	0.911131	0.0040466	0.00772532	0.0115267	0.0266094	0.0235438	0.00613121	0.0533415	0.0398529	0.0669528	0.0863274	0.398283	0.0350705	0.0956468	0.0584917	0.0213366	0.0147149	0.0217045	0.0286941
B	0	Omin025897p_OCMIN	Omin025897t	0.970566	0.0233873	0.276279	0.00942346	0.000514007	0.00231303	0.000942346	0.00197036	0.00102801	0.000942346	0.00334104	0.00077101	0.00214169	0.000257003	0.00582541	0.666495	0.00162769	0.00188469	0.000856678
A	1	Omin026175p_OCMIN	Omin026175t	0.953839	0.00591909	0.00944882	0.0190062	0.0114581	0.0148249	0.0235134	0.050991	0.0180288	0.0355145	0.114255	0.560304	0.0262286	0.0389357	0.0172142	0.0104806	0.00803693	0.0120011	0.0238393
A	0	Omin026249p_OCMIN	Omin026249t	0.996819	0	0	0.00121763	0.00235409	0.00487052	0.00308467	0.00551993	0.0112022	0	0.00259761	0.0101469	0	0	0.948697	0.00543875	0.00137998	0	0.00349054
A	0	Omin026543p_OCMIN	Omin026543t	0.848072	0.0153617	0.246098	0.0115213	0.00966303	0.279113	0.00737116	0.0345639	0.00768087	0.0346259	0.00260159	0.0536422	0.00557483	0.000309713	0.00111497	0.276635	0.00136273	0.0104683	0.00229187
A	0	Omin027163p_OCMIN	Omin027163t	0.983004	0.0777989	0.0126502	0.029475	0.00189753	0	0.00126502	0	0.00227704	0.00215054	0.00417457	0	0.00215054	0	0.0669197	0.775838	0	0.0234029	0
B	4	Omin027432p_OCMIN	Omin027432t	0.912519	0.402062	0.268041	0	0	0	0.226804	0	0	0	0	0	0	0	0	0.103093	0	0	0
B	4	Omin027433p_OCMIN	Omin027433t	0.869322	0.00546272	0.0215296	0.0221722	0.0642674	0.026671	0.035347	0.0678021	0.0379177	0.143316	0.0263496	0.120823	0.027635	0.310411	0.0138175	0	0.0147815	0.0273136	0.034383
B	4	Omin027434p_OCMIN	Omin027434t	1	0	0	0	0	0	0	0	0	0	0	0	0	0	0	0	0	1	0
B	4	Omin027435p_OCMIN	Omin027435t	0.916667	0	0	0	0	0	0	0.0498084	0.10728	0.214559	0.0613027	0.413793	0	0.0536398	0	0	0	0	0.0996169
A	0	Omin027643p_OCMIN	Omin027643t	NA	NA	NA	NA	NA	NA	NA	NA	NA	NA	NA	NA	NA	NA	NA	NA	NA	NA	NA
B	3	Omin027826p_OCMIN	Omin027826t	0.875201	0	0.320351	0.0262902	0	0.0126582	0	0.0146056	0.030185	0	0.0272639	0.083739	0.0983447	0	0.0116845	0.0389484	0.0710808	0.083739	0.18111
A	2	Omin028257p_OCMIN	Omin028257t	1	0	1	0	0	0	0	0	0	0	0	0	0	0	0	0	0	0	0
A	0	Omin028572p_OCMIN	Omin028572t	0.988161	0.0205668	0	0	0	0.00275897	0	0.00150489	0	0.00601956	0	0	0.00451467	0	0.832455	0.125658	0	0.00376223	0.00275897
A	0	Omin029592p_OCMIN	Omin029592t	0.954178	0	0.214394	0.0628788	0.00530303	0.00530303	0.0030303	0	0.0484848	0.0340909	0.0166667	0.00454546	0	0	0.0143939	0.562121	0.0121212	0.0166667	0
B	4	Omin029956p_OCMIN	Omin029956t	0.932127	0	0.160714	0.142857	0	0	0	0	0	0	0	0	0.464286	0	0	0.214286	0	0	0.0178571
