# Supplementary material for: Genomic signatures of G-protein-coupled receptor expansions reveal functional transitions in the evolution of cephalopod signal transduction
Source: Proc Biol Sci. 2019 Feb 27;286(1897):20182929. doi: 10.1098/rspb.2018.2929 (PMC6408891; doi:10.1098/rspb.2018.2929)
Supplement: Table S3 [file rspb20182929supp3.xlsx]

## Sheet: Interpro
Class	Group	Species	Tree_ID	Gene_ID	Library	Accesion	Description	Start_hit	End_hit	e-value	identifier	entry_name	GO_terms
A	1	E_scolopes	ESCOL_cluster_11281	cluster_11281	PRINTS	PR00237	Rhodopsin-like_GPCR_superfamily_signature	432	458	1.8e-18	IPR000276	G_protein-coupled_receptor,_rhodopsin-like	GO:0004930_GO:0007186_GO:0016021
A	1	E_scolopes	ESCOL_cluster_11281	cluster_11281	PANTHER	PTHR24241	NA	72	465	2.1e-36	NA	NA	NA
A	1	E_scolopes	ESCOL_cluster_11281	cluster_11281	PRINTS	PR00237	Rhodopsin-like_GPCR_superfamily_signature	106	127	1.8e-18	IPR000276	G_protein-coupled_receptor,_rhodopsin-like	GO:0004930_GO:0007186_GO:0016021
A	1	E_scolopes	ESCOL_cluster_11281	cluster_11281	Gene3D	G3DSA:1.20.1070.10	NA	61	317	7.1e-31	NA	NA	NA
A	1	E_scolopes	ESCOL_cluster_11281	cluster_11281	PRINTS	PR00237	Rhodopsin-like_GPCR_superfamily_signature	74	98	1.8e-18	IPR000276	G_protein-coupled_receptor,_rhodopsin-like	GO:0004930_GO:0007186_GO:0016021
A	1	E_scolopes	ESCOL_cluster_11281	cluster_11281	PRINTS	PR00237	Rhodopsin-like_GPCR_superfamily_signature	240	263	1.8e-18	IPR000276	G_protein-coupled_receptor,_rhodopsin-like	GO:0004930_GO:0007186_GO:0016021
A	1	E_scolopes	ESCOL_cluster_11281	cluster_11281	SUPERFAMILY	SSF81321	NA	46	274	1.19e-40	NA	NA	NA
A	1	E_scolopes	ESCOL_cluster_11281	cluster_11281	PRINTS	PR00237	Rhodopsin-like_GPCR_superfamily_signature	151	173	1.8e-18	IPR000276	G_protein-coupled_receptor,_rhodopsin-like	GO:0004930_GO:0007186_GO:0016021
A	1	E_scolopes	ESCOL_cluster_11281	cluster_11281	Gene3D	G3DSA:1.20.1070.10	NA	360	469	2e-14	NA	NA	NA
A	1	E_scolopes	ESCOL_cluster_11281	cluster_11281	PRINTS	PR00237	Rhodopsin-like_GPCR_superfamily_signature	390	414	1.8e-18	IPR000276	G_protein-coupled_receptor,_rhodopsin-like	GO:0004930_GO:0007186_GO:0016021
A	1	E_scolopes	ESCOL_cluster_11281	cluster_11281	Pfam	PF00001	7_transmembrane_receptor_(rhodopsin_family)	89	450	8e-30	IPR000276	G_protein-coupled_receptor,_rhodopsin-like	GO:0004930_GO:0007186_GO:0016021
A	1	E_scolopes	ESCOL_cluster_11281	cluster_11281	SUPERFAMILY	SSF81321	NA	379	468	1.19e-40	NA	NA	NA
A	1	E_scolopes	ESCOL_cluster_11281	cluster_11281	CDD	cd00637	7tm_classA_rhodopsin-like	76	454	2.37e-23	NA	NA	NA
A	1	E_scolopes	ESCOL_cluster_16569	cluster_16569	PRINTS	PR00237	Rhodopsin-like_GPCR_superfamily_signature	475	501	6.5e-14	IPR000276	G_protein-coupled_receptor,_rhodopsin-like	GO:0004930_GO:0007186_GO:0016021
A	1	E_scolopes	ESCOL_cluster_16569	cluster_16569	PANTHER	PTHR43916	NA	188	531	4.9e-37	NA	NA	NA
A	1	E_scolopes	ESCOL_cluster_16569	cluster_16569	PRINTS	PR00237	Rhodopsin-like_GPCR_superfamily_signature	229	250	6.5e-14	IPR000276	G_protein-coupled_receptor,_rhodopsin-like	GO:0004930_GO:0007186_GO:0016021
A	1	E_scolopes	ESCOL_cluster_16569	cluster_16569	SUPERFAMILY	SSF81321	NA	191	532	1.65e-44	NA	NA	NA
A	1	E_scolopes	ESCOL_cluster_16569	cluster_16569	PRINTS	PR00237	Rhodopsin-like_GPCR_superfamily_signature	433	457	6.5e-14	IPR000276	G_protein-coupled_receptor,_rhodopsin-like	GO:0004930_GO:0007186_GO:0016021
A	1	E_scolopes	ESCOL_cluster_16569	cluster_16569	PRINTS	PR00237	Rhodopsin-like_GPCR_superfamily_signature	274	296	6.5e-14	IPR000276	G_protein-coupled_receptor,_rhodopsin-like	GO:0004930_GO:0007186_GO:0016021
A	1	E_scolopes	ESCOL_cluster_16569	cluster_16569	Pfam	PF00001	7_transmembrane_receptor_(rhodopsin_family)	212		1.8e-24	IPR000276	G_protein-coupled_receptor,_rhodopsin-like	GO:0004930_GO:0007186_GO:0016021
A	1	E_scolopes	ESCOL_cluster_16569	cluster_16569	PRINTS	PR00237	Rhodopsin-like_GPCR_superfamily_signature	197	221	6.5e-14	IPR000276	G_protein-coupled_receptor,_rhodopsin-like	GO:0004930_GO:0007186_GO:0016021
A	1	E_scolopes	ESCOL_cluster_16569	cluster_16569	Gene3D	G3DSA:1.20.1070.10	NA	184	521	8.5e-48	NA	NA	NA
A	1	E_scolopes	ESCOL_cluster_17568	cluster_17568	PRINTS	PR00237	Rhodopsin-like_GPCR_superfamily_signature	346	372	1e-14	IPR000276	G_protein-coupled_receptor,_rhodopsin-like	GO:0004930_GO:0007186_GO:0016021
A	1	E_scolopes	ESCOL_cluster_17568	cluster_17568	PRINTS	PR00237	Rhodopsin-like_GPCR_superfamily_signature	111	132	1e-14	IPR000276	G_protein-coupled_receptor,_rhodopsin-like	GO:0004930_GO:0007186_GO:0016021
A	1	E_scolopes	ESCOL_cluster_17568	cluster_17568	PRINTS	PR00237	Rhodopsin-like_GPCR_superfamily_signature	79	103	1e-14	IPR000276	G_protein-coupled_receptor,_rhodopsin-like	GO:0004930_GO:0007186_GO:0016021
A	1	E_scolopes	ESCOL_cluster_17568	cluster_17568	PRINTS	PR00237	Rhodopsin-like_GPCR_superfamily_signature	303	327	1e-14	IPR000276	G_protein-coupled_receptor,_rhodopsin-like	GO:0004930_GO:0007186_GO:0016021
A	1	E_scolopes	ESCOL_cluster_17568	cluster_17568	CDD	cd00637	7tm_classA_rhodopsin-like	81	368	7.67e-30	NA	NA	NA
A	1	E_scolopes	ESCOL_cluster_17568	cluster_17568	PANTHER	PTHR43916	NA	77	401	2.6e-33	NA	NA	NA
A	1	E_scolopes	ESCOL_cluster_17568	cluster_17568	Gene3D	G3DSA:1.20.1070.10	NA	56	412	1.2e-41	NA	NA	NA
A	1	E_scolopes	ESCOL_cluster_17568	cluster_17568	PRINTS	PR00237	Rhodopsin-like_GPCR_superfamily_signature	156	178	1e-14	IPR000276	G_protein-coupled_receptor,_rhodopsin-like	GO:0004930_GO:0007186_GO:0016021
A	1	E_scolopes	ESCOL_cluster_17568	cluster_17568	Pfam	PF00001	7_transmembrane_receptor_(rhodopsin_family)	94	363	2.1e-24	IPR000276	G_protein-coupled_receptor,_rhodopsin-like	GO:0004930_GO:0007186_GO:0016021
A	1	E_scolopes	ESCOL_cluster_17568	cluster_17568	SUPERFAMILY	SSF81321	NA	55	394	2.47e-37	NA	NA	NA
A	1	E_scolopes	ESCOL_cluster_18396	cluster_18396	Gene3D	G3DSA:1.20.1070.10	NA	17	331	7.5e-44	NA	NA	NA
A	1	E_scolopes	ESCOL_cluster_18396	cluster_18396	PRINTS	PR00237	Rhodopsin-like_GPCR_superfamily_signature	104	126	8.6e-18	IPR000276	G_protein-coupled_receptor,_rhodopsin-like	GO:0004930_GO:0007186_GO:0016021
A	1	E_scolopes	ESCOL_cluster_18396	cluster_18396	PRINTS	PR00237	Rhodopsin-like_GPCR_superfamily_signature	59	80	8.6e-18	IPR000276	G_protein-coupled_receptor,_rhodopsin-like	GO:0004930_GO:0007186_GO:0016021
A	1	E_scolopes	ESCOL_cluster_18396	cluster_18396	SUPERFAMILY	SSF81321	NA	28	330	1.1e-38	NA	NA	NA
A	1	E_scolopes	ESCOL_cluster_18396	cluster_18396	PRINTS	PR00237	Rhodopsin-like_GPCR_superfamily_signature	293	319	8.6e-18	IPR000276	G_protein-coupled_receptor,_rhodopsin-like	GO:0004930_GO:0007186_GO:0016021
A	1	E_scolopes	ESCOL_cluster_18396	cluster_18396	PRINTS	PR00237	Rhodopsin-like_GPCR_superfamily_signature	252	276	8.6e-18	IPR000276	G_protein-coupled_receptor,_rhodopsin-like	GO:0004930_GO:0007186_GO:0016021
A	1	E_scolopes	ESCOL_cluster_18396	cluster_18396	Pfam	PF00001	7_transmembrane_receptor_(rhodopsin_family)	42	311	1.9e-24	IPR000276	G_protein-coupled_receptor,_rhodopsin-like	GO:0004930_GO:0007186_GO:0016021
A	1	E_scolopes	ESCOL_cluster_18396	cluster_18396	PRINTS	PR00237	Rhodopsin-like_GPCR_superfamily_signature	27	51	8.6e-18	IPR000276	G_protein-coupled_receptor,_rhodopsin-like	GO:0004930_GO:0007186_GO:0016021
A	1	E_scolopes	ESCOL_cluster_18396	cluster_18396	CDD	cd00637	7tm_classA_rhodopsin-like	29	315	1.42e-30	NA	NA	NA
A	1	E_scolopes	ESCOL_cluster_18396	cluster_18396	PANTHER	PTHR24241	NA	24	324	1.1e-35	NA	NA	NA
A	2	E_scolopes	ESCOL_cluster_18700	cluster_18700	PRINTS	PR00237	Rhodopsin-like_GPCR_superfamily_signature	102	124	1.1e-10	IPR000276	G_protein-coupled_receptor,_rhodopsin-like	GO:0004930_GO:0007186_GO:0016021
A	2	E_scolopes	ESCOL_cluster_18700	cluster_18700	PRINTS	PR00237	Rhodopsin-like_GPCR_superfamily_signature	334	360	1.1e-10	IPR000276	G_protein-coupled_receptor,_rhodopsin-like	GO:0004930_GO:0007186_GO:0016021
A	2	E_scolopes	ESCOL_cluster_18700	cluster_18700	CDD	cd00637	7tm_classA_rhodopsin-like	26	356	1.36e-27	NA	NA	NA
A	2	E_scolopes	ESCOL_cluster_18700	cluster_18700	SUPERFAMILY	SSF81321	NA	280	372	4.3e-40	NA	NA	NA
A	2	E_scolopes	ESCOL_cluster_18700	cluster_18700	Pfam	PF00001	7_transmembrane_receptor_(rhodopsin_family)	40	352	1.7e-23	IPR000276	G_protein-coupled_receptor,_rhodopsin-like	GO:0004930_GO:0007186_GO:0016021
A	2	E_scolopes	ESCOL_cluster_18700	cluster_18700	PANTHER	PTHR24241	NA	26	367	1.2e-37	NA	NA	NA
A	2	E_scolopes	ESCOL_cluster_18700	cluster_18700	SUPERFAMILY	SSF81321	NA	2	222	4.3e-40	NA	NA	NA
A	2	E_scolopes	ESCOL_cluster_18700	cluster_18700	PRINTS	PR00237	Rhodopsin-like_GPCR_superfamily_signature	25	49	1.1e-10	IPR000276	G_protein-coupled_receptor,_rhodopsin-like	GO:0004930_GO:0007186_GO:0016021
A	2	E_scolopes	ESCOL_cluster_18700	cluster_18700	PRINTS	PR00237	Rhodopsin-like_GPCR_superfamily_signature	57	78	1.1e-10	IPR000276	G_protein-coupled_receptor,_rhodopsin-like	GO:0004930_GO:0007186_GO:0016021
A	2	E_scolopes	ESCOL_cluster_18700	cluster_18700	PRINTS	PR00237	Rhodopsin-like_GPCR_superfamily_signature	291	315	1.1e-10	IPR000276	G_protein-coupled_receptor,_rhodopsin-like	GO:0004930_GO:0007186_GO:0016021
A	1	E_scolopes	ESCOL_cluster_20426	cluster_20426	PRINTS	PR00237	Rhodopsin-like_GPCR_superfamily_signature	63	84	7.2e-10	IPR000276	G_protein-coupled_receptor,_rhodopsin-like	GO:0004930_GO:0007186_GO:0016021
A	1	E_scolopes	ESCOL_cluster_20426	cluster_20426	PRINTS	PR00237	Rhodopsin-like_GPCR_superfamily_signature	290	316	7.2e-10	IPR000276	G_protein-coupled_receptor,_rhodopsin-like	GO:0004930_GO:0007186_GO:0016021
A	1	E_scolopes	ESCOL_cluster_20426	cluster_20426	Gene3D	G3DSA:1.20.1070.10	NA	13	329	1.4e-40	NA	NA	NA
A	1	E_scolopes	ESCOL_cluster_20426	cluster_20426	PANTHER	PTHR43962	NA	22	325	3.3e-27	IPR027459	Melatonin_receptor_1	GO:0007186_GO:0008502_GO:0016021
A	1	E_scolopes	ESCOL_cluster_20426	cluster_20426	PRINTS	PR00237	Rhodopsin-like_GPCR_superfamily_signature	31	55	7.2e-10	IPR000276	G_protein-coupled_receptor,_rhodopsin-like	GO:0004930_GO:0007186_GO:0016021
A	1	E_scolopes	ESCOL_cluster_20426	cluster_20426	SUPERFAMILY	SSF81321	NA	23	329	1.83e-37	NA	NA	NA
A	1	E_scolopes	ESCOL_cluster_20426	cluster_20426	PRINTS	PR00237	Rhodopsin-like_GPCR_superfamily_signature	108	130	7.2e-10	IPR000276	G_protein-coupled_receptor,_rhodopsin-like	GO:0004930_GO:0007186_GO:0016021
A	1	E_scolopes	ESCOL_cluster_20426	cluster_20426	Pfam	PF00001	7_transmembrane_receptor_(rhodopsin_family)	53	307	3e-22	IPR000276	G_protein-coupled_receptor,_rhodopsin-like	GO:0004930_GO:0007186_GO:0016021
A	1	E_scolopes	ESCOL_cluster_20426	cluster_20426	PRINTS	PR00237	Rhodopsin-like_GPCR_superfamily_signature	249	273	7.2e-10	IPR000276	G_protein-coupled_receptor,_rhodopsin-like	GO:0004930_GO:0007186_GO:0016021
A	1	E_scolopes	ESCOL_cluster_20426	cluster_20426	CDD	cd00637	7tm_classA_rhodopsin-like	33	312	2.53e-25	NA	NA	NA
A	1	E_scolopes	ESCOL_cluster_20427	cluster_20427	PRINTS	PR00237	Rhodopsin-like_GPCR_superfamily_signature	297	321	6.3e-18	IPR000276	G_protein-coupled_receptor,_rhodopsin-like	GO:0004930_GO:0007186_GO:0016021
A	1	E_scolopes	ESCOL_cluster_20427	cluster_20427	PRINTS	PR00237	Rhodopsin-like_GPCR_superfamily_signature	338	364	6.3e-18	IPR000276	G_protein-coupled_receptor,_rhodopsin-like	GO:0004930_GO:0007186_GO:0016021
A	1	E_scolopes	ESCOL_cluster_20427	cluster_20427	PANTHER	PTHR24229	NA	66	381	4.6e-36	NA	NA	NA
A	1	E_scolopes	ESCOL_cluster_20427	cluster_20427	CDD	cd00637	7tm_classA_rhodopsin-like	74	360	4.49e-36	NA	NA	NA
A	1	E_scolopes	ESCOL_cluster_20427	cluster_20427	PRINTS	PR00237	Rhodopsin-like_GPCR_superfamily_signature	233	256	6.3e-18	IPR000276	G_protein-coupled_receptor,_rhodopsin-like	GO:0004930_GO:0007186_GO:0016021
A	1	E_scolopes	ESCOL_cluster_20427	cluster_20427	Pfam	PF00001	7_transmembrane_receptor_(rhodopsin_family)	87	356	6.1e-27	IPR000276	G_protein-coupled_receptor,_rhodopsin-like	GO:0004930_GO:0007186_GO:0016021
A	1	E_scolopes	ESCOL_cluster_20427	cluster_20427	SUPERFAMILY	SSF81321	NA	44	392	3.94e-46	NA	NA	NA
A	1	E_scolopes	ESCOL_cluster_20427	cluster_20427	Gene3D	G3DSA:1.20.1070.10	NA	51	394	3.7e-46	NA	NA	NA
A	1	E_scolopes	ESCOL_cluster_20427	cluster_20427	PRINTS	PR00237	Rhodopsin-like_GPCR_superfamily_signature	104	125	6.3e-18	IPR000276	G_protein-coupled_receptor,_rhodopsin-like	GO:0004930_GO:0007186_GO:0016021
A	1	E_scolopes	ESCOL_cluster_20427	cluster_20427	PRINTS	PR00237	Rhodopsin-like_GPCR_superfamily_signature	72	96	6.3e-18	IPR000276	G_protein-coupled_receptor,_rhodopsin-like	GO:0004930_GO:0007186_GO:0016021
A	1	E_scolopes	ESCOL_cluster_20427	cluster_20427	PRINTS	PR00237	Rhodopsin-like_GPCR_superfamily_signature	149	171	6.3e-18	IPR000276	G_protein-coupled_receptor,_rhodopsin-like	GO:0004930_GO:0007186_GO:0016021
A	1	E_scolopes	ESCOL_cluster_20430	cluster_20430	PRINTS	PR00237	Rhodopsin-like_GPCR_superfamily_signature	186	209	9.5e-20	IPR000276	G_protein-coupled_receptor,_rhodopsin-like	GO:0004930_GO:0007186_GO:0016021
A	1	E_scolopes	ESCOL_cluster_20430	cluster_20430	PRINTS	PR00237	Rhodopsin-like_GPCR_superfamily_signature	57	78	9.5e-20	IPR000276	G_protein-coupled_receptor,_rhodopsin-like	GO:0004930_GO:0007186_GO:0016021
A	1	E_scolopes	ESCOL_cluster_20430	cluster_20430	PRINTS	PR00237	Rhodopsin-like_GPCR_superfamily_signature	136	157	9.5e-20	IPR000276	G_protein-coupled_receptor,_rhodopsin-like	GO:0004930_GO:0007186_GO:0016021
A	1	E_scolopes	ESCOL_cluster_20430	cluster_20430	SUPERFAMILY	SSF81321	NA	1	329	2.93e-46	NA	NA	NA
A	1	E_scolopes	ESCOL_cluster_20430	cluster_20430	PRINTS	PR00237	Rhodopsin-like_GPCR_superfamily_signature	102	124	9.5e-20	IPR000276	G_protein-coupled_receptor,_rhodopsin-like	GO:0004930_GO:0007186_GO:0016021
A	1	E_scolopes	ESCOL_cluster_20430	cluster_20430	Gene3D	G3DSA:1.20.1070.10	NA	7	334	9.5e-50	NA	NA	NA
A	1	E_scolopes	ESCOL_cluster_20430	cluster_20430	PRINTS	PR00237	Rhodopsin-like_GPCR_superfamily_signature	25	49	9.5e-20	IPR000276	G_protein-coupled_receptor,_rhodopsin-like	GO:0004930_GO:0007186_GO:0016021
A	1	E_scolopes	ESCOL_cluster_20430	cluster_20430	PANTHER	PTHR24229	NA	18	324	1.8e-39	NA	NA	NA
A	1	E_scolopes	ESCOL_cluster_20430	cluster_20430	PRINTS	PR00237	Rhodopsin-like_GPCR_superfamily_signature	292	318	9.5e-20	IPR000276	G_protein-coupled_receptor,_rhodopsin-like	GO:0004930_GO:0007186_GO:0016021
A	1	E_scolopes	ESCOL_cluster_20430	cluster_20430	Pfam	PF00001	7_transmembrane_receptor_(rhodopsin_family)	40	310	2.3e-28	IPR000276	G_protein-coupled_receptor,_rhodopsin-like	GO:0004930_GO:0007186_GO:0016021
A	1	E_scolopes	ESCOL_cluster_20430	cluster_20430	CDD	cd00637	7tm_classA_rhodopsin-like	27	314	7.63e-30	NA	NA	NA
A	1	E_scolopes	ESCOL_cluster_20431	cluster_20431	CDD	cd00637	7tm_classA_rhodopsin-like	398	685	1.88e-32	NA	NA	NA
A	1	E_scolopes	ESCOL_cluster_20431	cluster_20431	PRINTS	PR00237	Rhodopsin-like_GPCR_superfamily_signature	292	318	3.4e-19	IPR000276	G_protein-coupled_receptor,_rhodopsin-like	GO:0004930_GO:0007186_GO:0016021
A	1	E_scolopes	ESCOL_cluster_20431	cluster_20431	SUPERFAMILY	SSF81321	NA	369	718	2.75e-47	NA	NA	NA
A	1	E_scolopes	ESCOL_cluster_20431	cluster_20431	PRINTS	PR00237	Rhodopsin-like_GPCR_superfamily_signature	186	209	3.4e-19	IPR000276	G_protein-coupled_receptor,_rhodopsin-like	GO:0004930_GO:0007186_GO:0016021
A	1	E_scolopes	ESCOL_cluster_20431	cluster_20431	PRINTS	PR00237	Rhodopsin-like_GPCR_superfamily_signature	102	124	3.4e-19	IPR000276	G_protein-coupled_receptor,_rhodopsin-like	GO:0004930_GO:0007186_GO:0016021
A	1	E_scolopes	ESCOL_cluster_20431	cluster_20431	Gene3D	G3DSA:1.20.1070.10	NA	10	332	7.1e-48	NA	NA	NA
A	1	E_scolopes	ESCOL_cluster_20431	cluster_20431	Gene3D	G3DSA:1.20.1070.10	NA	381	703	3.4e-48	NA	NA	NA
A	1	E_scolopes	ESCOL_cluster_20431	cluster_20431	SUPERFAMILY	SSF81321	NA	19	330	1.56e-43	NA	NA	NA
A	1	E_scolopes	ESCOL_cluster_20431	cluster_20431	PRINTS	PR00237	Rhodopsin-like_GPCR_superfamily_signature	57	78	3.4e-19	IPR000276	G_protein-coupled_receptor,_rhodopsin-like	GO:0004930_GO:0007186_GO:0016021
A	1	E_scolopes	ESCOL_cluster_20431	cluster_20431	Pfam	PF00001	7_transmembrane_receptor_(rhodopsin_family)	411	681	3.1e-26	IPR000276	G_protein-coupled_receptor,_rhodopsin-like	GO:0004930_GO:0007186_GO:0016021
A	1	E_scolopes	ESCOL_cluster_20431	cluster_20431	PRINTS	PR00237	Rhodopsin-like_GPCR_superfamily_signature	25	49	3.4e-19	IPR000276	G_protein-coupled_receptor,_rhodopsin-like	GO:0004930_GO:0007186_GO:0016021
A	1	E_scolopes	ESCOL_cluster_20431	cluster_20431	PRINTS	PR00237	Rhodopsin-like_GPCR_superfamily_signature	136	157	3.4e-19	IPR000276	G_protein-coupled_receptor,_rhodopsin-like	GO:0004930_GO:0007186_GO:0016021
A	1	E_scolopes	ESCOL_cluster_20431	cluster_20431	CDD	cd00637	7tm_classA_rhodopsin-like	27	314	1.33e-35	NA	NA	NA
A	1	E_scolopes	ESCOL_cluster_20431	cluster_20431	Pfam	PF00001	7_transmembrane_receptor_(rhodopsin_family)	40	310	1e-25	IPR000276	G_protein-coupled_receptor,_rhodopsin-like	GO:0004930_GO:0007186_GO:0016021
A	1	E_scolopes	ESCOL_cluster_20432	cluster_20432	PRINTS	PR00237	Rhodopsin-like_GPCR_superfamily_signature	242	263	1.9e-13	IPR000276	G_protein-coupled_receptor,_rhodopsin-like	GO:0004930_GO:0007186_GO:0016021
A	1	E_scolopes	ESCOL_cluster_20432	cluster_20432	PRINTS	PR00237	Rhodopsin-like_GPCR_superfamily_signature	287	309	1.9e-13	IPR000276	G_protein-coupled_receptor,_rhodopsin-like	GO:0004930_GO:0007186_GO:0016021
A	1	E_scolopes	ESCOL_cluster_20432	cluster_20432	PANTHER	PTHR24243:SF148	NA	20	161	5.8e-49	NA	NA	NA
A	1	E_scolopes	ESCOL_cluster_20432	cluster_20432	PRINTS	PR00237	Rhodopsin-like_GPCR_superfamily_signature	426	450	1.9e-13	IPR000276	G_protein-coupled_receptor,_rhodopsin-like	GO:0004930_GO:0007186_GO:0016021
A	1	E_scolopes	ESCOL_cluster_20432	cluster_20432	Pfam	PF00001	7_transmembrane_receptor_(rhodopsin_family)	225	485	2.9e-24	IPR000276	G_protein-coupled_receptor,_rhodopsin-like	GO:0004930_GO:0007186_GO:0016021
A	1	E_scolopes	ESCOL_cluster_20432	cluster_20432	CDD	cd00637	7tm_classA_rhodopsin-like	27	164	3.45e-18	NA	NA	NA
A	1	E_scolopes	ESCOL_cluster_20432	cluster_20432	PRINTS	PR00237	Rhodopsin-like_GPCR_superfamily_signature	210	234	1.9e-13	IPR000276	G_protein-coupled_receptor,_rhodopsin-like	GO:0004930_GO:0007186_GO:0016021
A	1	E_scolopes	ESCOL_cluster_20432	cluster_20432	Gene3D	G3DSA:1.20.1070.10	NA	9	187	3.6e-25	NA	NA	NA
A	1	E_scolopes	ESCOL_cluster_20432	cluster_20432	PANTHER	PTHR24243:SF148	NA	205	502	5.8e-49	NA	NA	NA
A	1	E_scolopes	ESCOL_cluster_20432	cluster_20432	Gene3D	G3DSA:1.20.1070.10	NA	194	509	1.6e-42	NA	NA	NA
A	1	E_scolopes	ESCOL_cluster_20432	cluster_20432	PRINTS	PR00237	Rhodopsin-like_GPCR_superfamily_signature	467	493	1.9e-13	IPR000276	G_protein-coupled_receptor,_rhodopsin-like	GO:0004930_GO:0007186_GO:0016021
A	1	E_scolopes	ESCOL_cluster_20432	cluster_20432	Pfam	PF00001	7_transmembrane_receptor_(rhodopsin_family)	41	161	8.4e-16	IPR000276	G_protein-coupled_receptor,_rhodopsin-like	GO:0004930_GO:0007186_GO:0016021
A	1	E_scolopes	ESCOL_cluster_20432	cluster_20432	CDD	cd00637	7tm_classA_rhodopsin-like	212	489	4.33e-24	NA	NA	NA
A	1	E_scolopes	ESCOL_cluster_20432	cluster_20432	SUPERFAMILY	SSF81321	NA	200	509	2.56e-41	NA	NA	NA
A	1	E_scolopes	ESCOL_cluster_20432	cluster_20432	SUPERFAMILY	SSF81321	NA	17	161	1.65e-24	NA	NA	NA
A	1	E_scolopes	ESCOL_cluster_20432	cluster_20432	PANTHER	PTHR24243	NA	205	502	5.8e-49	NA	NA	NA
A	1	E_scolopes	ESCOL_cluster_20432	cluster_20432	PANTHER	PTHR24243	NA	20	161	5.8e-49	NA	NA	NA
A	1	E_scolopes	ESCOL_cluster_20480	cluster_20480	PRINTS	PR00237	Rhodopsin-like_GPCR_superfamily_signature	92	116	4e-12	IPR000276	G_protein-coupled_receptor,_rhodopsin-like	GO:0004930_GO:0007186_GO:0016021
A	1	E_scolopes	ESCOL_cluster_20480	cluster_20480	PRINTS	PR00237	Rhodopsin-like_GPCR_superfamily_signature	124	145	4e-12	IPR000276	G_protein-coupled_receptor,_rhodopsin-like	GO:0004930_GO:0007186_GO:0016021
A	1	E_scolopes	ESCOL_cluster_20480	cluster_20480	PANTHER	PTHR43916	NA	78	384	2e-34	NA	NA	NA
A	1	E_scolopes	ESCOL_cluster_20480	cluster_20480	PRINTS	PR00237	Rhodopsin-like_GPCR_superfamily_signature	169	191	4e-12	IPR000276	G_protein-coupled_receptor,_rhodopsin-like	GO:0004930_GO:0007186_GO:0016021
A	1	E_scolopes	ESCOL_cluster_20480	cluster_20480	SUPERFAMILY	SSF81321	NA	88	391	2.84e-41	NA	NA	NA
A	1	E_scolopes	ESCOL_cluster_20480	cluster_20480	PRINTS	PR00237	Rhodopsin-like_GPCR_superfamily_signature	342	368	4e-12	IPR000276	G_protein-coupled_receptor,_rhodopsin-like	GO:0004930_GO:0007186_GO:0016021
A	1	E_scolopes	ESCOL_cluster_20480	cluster_20480	PRINTS	PR00237	Rhodopsin-like_GPCR_superfamily_signature	254	277	4e-12	IPR000276	G_protein-coupled_receptor,_rhodopsin-like	GO:0004930_GO:0007186_GO:0016021
A	1	E_scolopes	ESCOL_cluster_20480	cluster_20480	CDD	cd00637	7tm_classA_rhodopsin-like	95	363	6.22e-28	NA	NA	NA
A	1	E_scolopes	ESCOL_cluster_20480	cluster_20480	Gene3D	G3DSA:1.20.1070.10	NA	61	392	3.1e-43	NA	NA	NA
A	1	E_scolopes	ESCOL_cluster_20480	cluster_20480	Pfam	PF00001	7_transmembrane_receptor_(rhodopsin_family)	107	360	1.4e-22	IPR000276	G_protein-coupled_receptor,_rhodopsin-like	GO:0004930_GO:0007186_GO:0016021
A	1	E_scolopes	ESCOL_cluster_20481	cluster_20481	PANTHER	PTHR24249	NA	20	323	1.3e-38	NA	NA	NA
A	1	E_scolopes	ESCOL_cluster_20481	cluster_20481	SUPERFAMILY	SSF81321	NA	19	326	4.58e-47	NA	NA	NA
A	1	E_scolopes	ESCOL_cluster_20481	cluster_20481	CDD	cd00637	7tm_classA_rhodopsin-like	28	312	1.37e-33	NA	NA	NA
A	1	E_scolopes	ESCOL_cluster_20481	cluster_20481	PRINTS	PR00237	Rhodopsin-like_GPCR_superfamily_signature	25	49	4.2e-18	IPR000276	G_protein-coupled_receptor,_rhodopsin-like	GO:0004930_GO:0007186_GO:0016021
A	1	E_scolopes	ESCOL_cluster_20481	cluster_20481	Pfam	PF00001	7_transmembrane_receptor_(rhodopsin_family)	40	308	6.4e-28	IPR000276	G_protein-coupled_receptor,_rhodopsin-like	GO:0004930_GO:0007186_GO:0016021
A	1	E_scolopes	ESCOL_cluster_20481	cluster_20481	PRINTS	PR00237	Rhodopsin-like_GPCR_superfamily_signature	249	273	4.2e-18	IPR000276	G_protein-coupled_receptor,_rhodopsin-like	GO:0004930_GO:0007186_GO:0016021
A	1	E_scolopes	ESCOL_cluster_20481	cluster_20481	PRINTS	PR00237	Rhodopsin-like_GPCR_superfamily_signature	57	78	4.2e-18	IPR000276	G_protein-coupled_receptor,_rhodopsin-like	GO:0004930_GO:0007186_GO:0016021
A	1	E_scolopes	ESCOL_cluster_20481	cluster_20481	PRINTS	PR00237	Rhodopsin-like_GPCR_superfamily_signature	102	124	4.2e-18	IPR000276	G_protein-coupled_receptor,_rhodopsin-like	GO:0004930_GO:0007186_GO:0016021
A	1	E_scolopes	ESCOL_cluster_20481	cluster_20481	PRINTS	PR00237	Rhodopsin-like_GPCR_superfamily_signature	290	316	4.2e-18	IPR000276	G_protein-coupled_receptor,_rhodopsin-like	GO:0004930_GO:0007186_GO:0016021
A	1	E_scolopes	ESCOL_cluster_20481	cluster_20481	PANTHER	PTHR24249:SF372	NA	20	323	1.3e-38	NA	NA	NA
A	1	E_scolopes	ESCOL_cluster_20481	cluster_20481	Gene3D	G3DSA:1.20.1070.10	NA	10	329	3.5e-49	NA	NA	NA
A	1	E_scolopes	ESCOL_cluster_20481	cluster_20481	PRINTS	PR00237	Rhodopsin-like_GPCR_superfamily_signature	189	212	4.2e-18	IPR000276	G_protein-coupled_receptor,_rhodopsin-like	GO:0004930_GO:0007186_GO:0016021
A	1	E_scolopes	ESCOL_cluster_20526	cluster_20526	PANTHER	PTHR24228	NA	25	342	2.2e-36	NA	NA	NA
A	1	E_scolopes	ESCOL_cluster_20526	cluster_20526	PRINTS	PR00237	Rhodopsin-like_GPCR_superfamily_signature	57	78	5.3e-15	IPR000276	G_protein-coupled_receptor,_rhodopsin-like	GO:0004930_GO:0007186_GO:0016021
A	1	E_scolopes	ESCOL_cluster_20526	cluster_20526	Pfam	PF00001	7_transmembrane_receptor_(rhodopsin_family)	40	304	2.3e-27	IPR000276	G_protein-coupled_receptor,_rhodopsin-like	GO:0004930_GO:0007186_GO:0016021
A	1	E_scolopes	ESCOL_cluster_20526	cluster_20526	Gene3D	G3DSA:1.20.1070.10	NA	8	330	5.1e-47	NA	NA	NA
A	1	E_scolopes	ESCOL_cluster_20526	cluster_20526	PRINTS	PR00237	Rhodopsin-like_GPCR_superfamily_signature	136	157	5.3e-15	IPR000276	G_protein-coupled_receptor,_rhodopsin-like	GO:0004930_GO:0007186_GO:0016021
A	1	E_scolopes	ESCOL_cluster_20526	cluster_20526	PRINTS	PR00237	Rhodopsin-like_GPCR_superfamily_signature	25	49	5.3e-15	IPR000276	G_protein-coupled_receptor,_rhodopsin-like	GO:0004930_GO:0007186_GO:0016021
A	1	E_scolopes	ESCOL_cluster_20526	cluster_20526	SUPERFAMILY	SSF81321	NA	21	337	4.58e-44	NA	NA	NA
A	1	E_scolopes	ESCOL_cluster_20526	cluster_20526	CDD	cd00637	7tm_classA_rhodopsin-like	27	308	1.48e-35	NA	NA	NA
A	1	E_scolopes	ESCOL_cluster_20526	cluster_20526	PRINTS	PR00237	Rhodopsin-like_GPCR_superfamily_signature	102	124	5.3e-15	IPR000276	G_protein-coupled_receptor,_rhodopsin-like	GO:0004930_GO:0007186_GO:0016021
A	1	E_scolopes	ESCOL_cluster_20526	cluster_20526	PRINTS	PR00237	Rhodopsin-like_GPCR_superfamily_signature	286	312	5.3e-15	IPR000276	G_protein-coupled_receptor,_rhodopsin-like	GO:0004930_GO:0007186_GO:0016021
A	1	E_scolopes	ESCOL_cluster_23523	cluster_23523	SUPERFAMILY	SSF81321	NA	97	298	1.01e-41	NA	NA	NA
A	1	E_scolopes	ESCOL_cluster_23523	cluster_23523	PRINTS	PR00237	Rhodopsin-like_GPCR_superfamily_signature	368	392	1.5e-17	IPR000276	G_protein-coupled_receptor,_rhodopsin-like	GO:0004930_GO:0007186_GO:0016021
A	1	E_scolopes	ESCOL_cluster_23523	cluster_23523	PRINTS	PR00237	Rhodopsin-like_GPCR_superfamily_signature	103	127	1.5e-17	IPR000276	G_protein-coupled_receptor,_rhodopsin-like	GO:0004930_GO:0007186_GO:0016021
A	1	E_scolopes	ESCOL_cluster_23523	cluster_23523	SUPERFAMILY	SSF81321	NA	364	455	1.01e-41	NA	NA	NA
A	1	E_scolopes	ESCOL_cluster_23523	cluster_23523	Pfam	PF00001	7_transmembrane_receptor_(rhodopsin_family)	118	427	2.5e-26	IPR000276	G_protein-coupled_receptor,_rhodopsin-like	GO:0004930_GO:0007186_GO:0016021
A	1	E_scolopes	ESCOL_cluster_23523	cluster_23523	PRINTS	PR00237	Rhodopsin-like_GPCR_superfamily_signature	178	200	1.5e-17	IPR000276	G_protein-coupled_receptor,_rhodopsin-like	GO:0004930_GO:0007186_GO:0016021
A	1	E_scolopes	ESCOL_cluster_23523	cluster_23523	CDD	cd00637	7tm_classA_rhodopsin-like	119	429	7.27e-27	NA	NA	NA
A	1	E_scolopes	ESCOL_cluster_23523	cluster_23523	PRINTS	PR00237	Rhodopsin-like_GPCR_superfamily_signature	409	435	1.5e-17	IPR000276	G_protein-coupled_receptor,_rhodopsin-like	GO:0004930_GO:0007186_GO:0016021
A	1	E_scolopes	ESCOL_cluster_23523	cluster_23523	PANTHER	PTHR24243:SF148	NA	100	453	6.6e-40	NA	NA	NA
A	1	E_scolopes	ESCOL_cluster_23523	cluster_23523	Gene3D	G3DSA:1.20.1070.10	NA	89	456	9e-46	NA	NA	NA
A	1	E_scolopes	ESCOL_cluster_23523	cluster_23523	Pfam	PF00078	Reverse_transcriptase_(RNA-dependent_DNA_polymerase)	23	71	9.9e-07	IPR000477	Reverse_transcriptase_domain	NA
A	1	E_scolopes	ESCOL_cluster_23523	cluster_23523	PANTHER	PTHR24243	NA	100	453	6.6e-40	NA	NA	NA
A	1	E_scolopes	ESCOL_cluster_23523	cluster_23523	PRINTS	PR00237	Rhodopsin-like_GPCR_superfamily_signature	135	156	1.5e-17	IPR000276	G_protein-coupled_receptor,_rhodopsin-like	GO:0004930_GO:0007186_GO:0016021
A	1	E_scolopes	ESCOL_cluster_23523	cluster_23523	PRINTS	PR00237	Rhodopsin-like_GPCR_superfamily_signature	267	290	1.5e-17	IPR000276	G_protein-coupled_receptor,_rhodopsin-like	GO:0004930_GO:0007186_GO:0016021
A	1	E_scolopes	ESCOL_cluster_23761	cluster_23761	Gene3D	G3DSA:1.20.1070.10	NA	17	325	6.4e-52	NA	NA	NA
A	1	E_scolopes	ESCOL_cluster_23761	cluster_23761	PRINTS	PR00237	Rhodopsin-like_GPCR_superfamily_signature	282	308	1.4e-22	IPR000276	G_protein-coupled_receptor,_rhodopsin-like	GO:0004930_GO:0007186_GO:0016021
A	1	E_scolopes	ESCOL_cluster_23761	cluster_23761	PRINTS	PR00237	Rhodopsin-like_GPCR_superfamily_signature	133	154	1.4e-22	IPR000276	G_protein-coupled_receptor,_rhodopsin-like	GO:0004930_GO:0007186_GO:0016021
A	1	E_scolopes	ESCOL_cluster_23761	cluster_23761	CDD	cd00637	7tm_classA_rhodopsin-like	23	304	5.18e-37	NA	NA	NA
A	1	E_scolopes	ESCOL_cluster_23761	cluster_23761	PRINTS	PR00237	Rhodopsin-like_GPCR_superfamily_signature	54	75	1.4e-22	IPR000276	G_protein-coupled_receptor,_rhodopsin-like	GO:0004930_GO:0007186_GO:0016021
A	1	E_scolopes	ESCOL_cluster_23761	cluster_23761	PRINTS	PR00237	Rhodopsin-like_GPCR_superfamily_signature	99	121	1.4e-22	IPR000276	G_protein-coupled_receptor,_rhodopsin-like	GO:0004930_GO:0007186_GO:0016021
A	1	E_scolopes	ESCOL_cluster_23761	cluster_23761	PRINTS	PR00237	Rhodopsin-like_GPCR_superfamily_signature	183	206	1.4e-22	IPR000276	G_protein-coupled_receptor,_rhodopsin-like	GO:0004930_GO:0007186_GO:0016021
A	1	E_scolopes	ESCOL_cluster_23761	cluster_23761	PRINTS	PR00237	Rhodopsin-like_GPCR_superfamily_signature	22	46	1.4e-22	IPR000276	G_protein-coupled_receptor,_rhodopsin-like	GO:0004930_GO:0007186_GO:0016021
A	1	E_scolopes	ESCOL_cluster_23761	cluster_23761	PANTHER	PTHR24241	NA	23	316	5.7e-41	NA	NA	NA
A	1	E_scolopes	ESCOL_cluster_23761	cluster_23761	PRINTS	PR00237	Rhodopsin-like_GPCR_superfamily_signature	246	270	1.4e-22	IPR000276	G_protein-coupled_receptor,_rhodopsin-like	GO:0004930_GO:0007186_GO:0016021
A	1	E_scolopes	ESCOL_cluster_23761	cluster_23761	Pfam	PF00001	7_transmembrane_receptor_(rhodopsin_family)	37	300	7.1e-31	IPR000276	G_protein-coupled_receptor,_rhodopsin-like	GO:0004930_GO:0007186_GO:0016021
A	1	E_scolopes	ESCOL_cluster_23761	cluster_23761	SUPERFAMILY	SSF81321	NA	22	331	1.65e-46	NA	NA	NA
A	1	E_scolopes	ESCOL_cluster_27143	cluster_27143	PRINTS	PR00237	Rhodopsin-like_GPCR_superfamily_signature	260	284	1.6e-20	IPR000276	G_protein-coupled_receptor,_rhodopsin-like	GO:0004930_GO:0007186_GO:0016021
A	1	E_scolopes	ESCOL_cluster_27143	cluster_27143	PRINTS	PR00237	Rhodopsin-like_GPCR_superfamily_signature	301	327	1.6e-20	IPR000276	G_protein-coupled_receptor,_rhodopsin-like	GO:0004930_GO:0007186_GO:0016021
A	1	E_scolopes	ESCOL_cluster_27143	cluster_27143	PANTHER	PTHR24243:SF148	NA	33	340	8.2e-35	NA	NA	NA
A	1	E_scolopes	ESCOL_cluster_27143	cluster_27143	Gene3D	G3DSA:1.20.1070.10	NA	28	343	1.3e-44	NA	NA	NA
A	1	E_scolopes	ESCOL_cluster_27143	cluster_27143	Pfam	PF00001	7_transmembrane_receptor_(rhodopsin_family)	53	319	1.1e-22	IPR000276	G_protein-coupled_receptor,_rhodopsin-like	GO:0004930_GO:0007186_GO:0016021
A	1	E_scolopes	ESCOL_cluster_27143	cluster_27143	PRINTS	PR00237	Rhodopsin-like_GPCR_superfamily_signature	204	227	1.6e-20	IPR000276	G_protein-coupled_receptor,_rhodopsin-like	GO:0004930_GO:0007186_GO:0016021
A	1	E_scolopes	ESCOL_cluster_27143	cluster_27143	SUPERFAMILY	SSF81321	NA	16	339	8.51e-43	NA	NA	NA
A	1	E_scolopes	ESCOL_cluster_27143	cluster_27143	PRINTS	PR00237	Rhodopsin-like_GPCR_superfamily_signature	38	62	1.6e-20	IPR000276	G_protein-coupled_receptor,_rhodopsin-like	GO:0004930_GO:0007186_GO:0016021
A	1	E_scolopes	ESCOL_cluster_27143	cluster_27143	PANTHER	PTHR24243	NA	33	340	8.2e-35	NA	NA	NA
A	1	E_scolopes	ESCOL_cluster_27143	cluster_27143	PRINTS	PR00237	Rhodopsin-like_GPCR_superfamily_signature	115	137	1.6e-20	IPR000276	G_protein-coupled_receptor,_rhodopsin-like	GO:0004930_GO:0007186_GO:0016021
A	1	E_scolopes	ESCOL_cluster_27143	cluster_27143	CDD	cd00637	7tm_classA_rhodopsin-like	42	323	9.2e-33	NA	NA	NA
A	1	E_scolopes	ESCOL_cluster_27143	cluster_27143	PRINTS	PR00237	Rhodopsin-like_GPCR_superfamily_signature	70	91	1.6e-20	IPR000276	G_protein-coupled_receptor,_rhodopsin-like	GO:0004930_GO:0007186_GO:0016021
A	1	E_scolopes	ESCOL_cluster_28279	cluster_28279	PRINTS	PR00237	Rhodopsin-like_GPCR_superfamily_signature	186	209	1.6e-17	IPR000276	G_protein-coupled_receptor,_rhodopsin-like	GO:0004930_GO:0007186_GO:0016021
A	1	E_scolopes	ESCOL_cluster_28279	cluster_28279	SUPERFAMILY	SSF81321	NA	5	325	9.06e-42	NA	NA	NA
A	1	E_scolopes	ESCOL_cluster_28279	cluster_28279	PRINTS	PR00237	Rhodopsin-like_GPCR_superfamily_signature	291	317	1.6e-17	IPR000276	G_protein-coupled_receptor,_rhodopsin-like	GO:0004930_GO:0007186_GO:0016021
A	1	E_scolopes	ESCOL_cluster_28279	cluster_28279	PRINTS	PR00237	Rhodopsin-like_GPCR_superfamily_signature	25	49	1.6e-17	IPR000276	G_protein-coupled_receptor,_rhodopsin-like	GO:0004930_GO:0007186_GO:0016021
A	1	E_scolopes	ESCOL_cluster_28279	cluster_28279	PRINTS	PR00237	Rhodopsin-like_GPCR_superfamily_signature	57	78	1.6e-17	IPR000276	G_protein-coupled_receptor,_rhodopsin-like	GO:0004930_GO:0007186_GO:0016021
A	1	E_scolopes	ESCOL_cluster_28279	cluster_28279	PRINTS	PR00237	Rhodopsin-like_GPCR_superfamily_signature	102	124	1.6e-17	IPR000276	G_protein-coupled_receptor,_rhodopsin-like	GO:0004930_GO:0007186_GO:0016021
A	1	E_scolopes	ESCOL_cluster_28279	cluster_28279	PANTHER	PTHR24241	NA	18	324	7.1e-36	NA	NA	NA
A	1	E_scolopes	ESCOL_cluster_28279	cluster_28279	Gene3D	G3DSA:1.20.1070.10	NA	3	333	6.5e-45	NA	NA	NA
A	1	E_scolopes	ESCOL_cluster_28279	cluster_28279	Pfam	PF00001	7_transmembrane_receptor_(rhodopsin_family)	40	309	2e-26	IPR000276	G_protein-coupled_receptor,_rhodopsin-like	GO:0004930_GO:0007186_GO:0016021
A	1	E_scolopes	ESCOL_cluster_28279	cluster_28279	CDD	cd00637	7tm_classA_rhodopsin-like	27	313	6.12e-29	NA	NA	NA
A	1	E_scolopes	ESCOL_cluster_28882	cluster_28882	PRINTS	PR00237	Rhodopsin-like_GPCR_superfamily_signature	56	77	2.8e-16	IPR000276	G_protein-coupled_receptor,_rhodopsin-like	GO:0004930_GO:0007186_GO:0016021
A	1	E_scolopes	ESCOL_cluster_28882	cluster_28882	PRINTS	PR00237	Rhodopsin-like_GPCR_superfamily_signature	24	48	2.8e-16	IPR000276	G_protein-coupled_receptor,_rhodopsin-like	GO:0004930_GO:0007186_GO:0016021
A	1	E_scolopes	ESCOL_cluster_28882	cluster_28882	Gene3D	G3DSA:1.20.1070.10	NA	6	334	2e-50	NA	NA	NA
A	1	E_scolopes	ESCOL_cluster_28882	cluster_28882	SMART	SM01381	NA	33	320	6.4e-05	IPR000276	G_protein-coupled_receptor,_rhodopsin-like	GO:0004930_GO:0007186_GO:0016021
A	1	E_scolopes	ESCOL_cluster_28882	cluster_28882	PRINTS	PR00237	Rhodopsin-like_GPCR_superfamily_signature	287	313	2.8e-16	IPR000276	G_protein-coupled_receptor,_rhodopsin-like	GO:0004930_GO:0007186_GO:0016021
A	1	E_scolopes	ESCOL_cluster_28882	cluster_28882	PRINTS	PR00237	Rhodopsin-like_GPCR_superfamily_signature	247	271	2.8e-16	IPR000276	G_protein-coupled_receptor,_rhodopsin-like	GO:0004930_GO:0007186_GO:0016021
A	1	E_scolopes	ESCOL_cluster_28882	cluster_28882	CDD	cd00637	7tm_classA_rhodopsin-like	32	309	2.71e-31	NA	NA	NA
A	1	E_scolopes	ESCOL_cluster_28882	cluster_28882	PANTHER	PTHR24241	NA	21	320	4.1e-39	NA	NA	NA
A	1	E_scolopes	ESCOL_cluster_28882	cluster_28882	PRINTS	PR00237	Rhodopsin-like_GPCR_superfamily_signature	101	123	2.8e-16	IPR000276	G_protein-coupled_receptor,_rhodopsin-like	GO:0004930_GO:0007186_GO:0016021
A	1	E_scolopes	ESCOL_cluster_28882	cluster_28882	Pfam	PF00001	7_transmembrane_receptor_(rhodopsin_family)	39	305	2.1e-28	IPR000276	G_protein-coupled_receptor,_rhodopsin-like	GO:0004930_GO:0007186_GO:0016021
A	1	E_scolopes	ESCOL_cluster_28882	cluster_28882	SUPERFAMILY	SSF81321	NA	23	331	4.94e-43	NA	NA	NA
A	1	E_scolopes	ESCOL_cluster_28882	cluster_28882	PANTHER	PTHR24241:SF76	NA	21	320	4.1e-39	NA	NA	NA
A	1	E_scolopes	ESCOL_cluster_3700	cluster_3700	PRINTS	PR00237	Rhodopsin-like_GPCR_superfamily_signature	273	299	1.5e-08	IPR000276	G_protein-coupled_receptor,_rhodopsin-like	GO:0004930_GO:0007186_GO:0016021
A	1	E_scolopes	ESCOL_cluster_3700	cluster_3700	PRINTS	PR00237	Rhodopsin-like_GPCR_superfamily_signature	20	44	1.5e-08	IPR000276	G_protein-coupled_receptor,_rhodopsin-like	GO:0004930_GO:0007186_GO:0016021
A	1	E_scolopes	ESCOL_cluster_3700	cluster_3700	CDD	cd14964	7tm_GPCRs	22	295	3.81e-20	NA	NA	NA
A	1	E_scolopes	ESCOL_cluster_3700	cluster_3700	PRINTS	PR00237	Rhodopsin-like_GPCR_superfamily_signature	97	119	1.5e-08	IPR000276	G_protein-coupled_receptor,_rhodopsin-like	GO:0004930_GO:0007186_GO:0016021
A	1	E_scolopes	ESCOL_cluster_3700	cluster_3700	Pfam	PF00001	7_transmembrane_receptor_(rhodopsin_family)	35	291	3.7e-18	IPR000276	G_protein-coupled_receptor,_rhodopsin-like	GO:0004930_GO:0007186_GO:0016021
A	1	E_scolopes	ESCOL_cluster_3700	cluster_3700	SUPERFAMILY	SSF81321	NA	16	317	3.11e-38	NA	NA	NA
A	1	E_scolopes	ESCOL_cluster_3700	cluster_3700	PRINTS	PR00237	Rhodopsin-like_GPCR_superfamily_signature	52	73	1.5e-08	IPR000276	G_protein-coupled_receptor,_rhodopsin-like	GO:0004930_GO:0007186_GO:0016021
A	1	E_scolopes	ESCOL_cluster_3700	cluster_3700	Gene3D	G3DSA:1.20.1070.10	NA	7	314	9.1e-41	NA	NA	NA
A	1	E_scolopes	ESCOL_cluster_3700	cluster_3700	PANTHER	PTHR24229	NA	11	319	1.6e-32	NA	NA	NA
A	1	E_scolopes	ESCOL_cluster_4005	cluster_4005	PANTHER	PTHR24241	NA	21	324	9.4e-47	NA	NA	NA
A	1	E_scolopes	ESCOL_cluster_4005	cluster_4005	Gene3D	G3DSA:1.20.1070.10	NA	5	350	1.7e-58	NA	NA	NA
A	1	E_scolopes	ESCOL_cluster_4005	cluster_4005	Pfam	PF00001	7_transmembrane_receptor_(rhodopsin_family)	38	309	2.7e-33	IPR000276	G_protein-coupled_receptor,_rhodopsin-like	GO:0004930_GO:0007186_GO:0016021
A	1	E_scolopes	ESCOL_cluster_4005	cluster_4005	PRINTS	PR00237	Rhodopsin-like_GPCR_superfamily_signature	55	76	3.3e-22	IPR000276	G_protein-coupled_receptor,_rhodopsin-like	GO:0004930_GO:0007186_GO:0016021
A	1	E_scolopes	ESCOL_cluster_4005	cluster_4005	SUPERFAMILY	SSF81321	NA	21	337	1.37e-51	NA	NA	NA
A	1	E_scolopes	ESCOL_cluster_4005	cluster_4005	PRINTS	PR00237	Rhodopsin-like_GPCR_superfamily_signature	249	273	3.3e-22	IPR000276	G_protein-coupled_receptor,_rhodopsin-like	GO:0004930_GO:0007186_GO:0016021
A	1	E_scolopes	ESCOL_cluster_4005	cluster_4005	PRINTS	PR00237	Rhodopsin-like_GPCR_superfamily_signature	189	212	3.3e-22	IPR000276	G_protein-coupled_receptor,_rhodopsin-like	GO:0004930_GO:0007186_GO:0016021
A	1	E_scolopes	ESCOL_cluster_4005	cluster_4005	PRINTS	PR00237	Rhodopsin-like_GPCR_superfamily_signature	100	122	3.3e-22	IPR000276	G_protein-coupled_receptor,_rhodopsin-like	GO:0004930_GO:0007186_GO:0016021
A	1	E_scolopes	ESCOL_cluster_4005	cluster_4005	PRINTS	PR00237	Rhodopsin-like_GPCR_superfamily_signature	23	47	3.3e-22	IPR000276	G_protein-coupled_receptor,_rhodopsin-like	GO:0004930_GO:0007186_GO:0016021
A	1	E_scolopes	ESCOL_cluster_4005	cluster_4005	CDD	cd00637	7tm_classA_rhodopsin-like	25	313	1.45e-41	NA	NA	NA
A	1	E_scolopes	ESCOL_cluster_4005	cluster_4005	PRINTS	PR00237	Rhodopsin-like_GPCR_superfamily_signature	291	317	3.3e-22	IPR000276	G_protein-coupled_receptor,_rhodopsin-like	GO:0004930_GO:0007186_GO:0016021
A	2	E_scolopes	ESCOL_cluster_5205	cluster_5205	SUPERFAMILY	SSF81321	NA	366	453	7.96e-41	NA	NA	NA
A	2	E_scolopes	ESCOL_cluster_5205	cluster_5205	PRINTS	PR00237	Rhodopsin-like_GPCR_superfamily_signature	192	214	3.1e-14	IPR000276	G_protein-coupled_receptor,_rhodopsin-like	GO:0004930_GO:0007186_GO:0016021
A	2	E_scolopes	ESCOL_cluster_5205	cluster_5205	CDD	cd00637	7tm_classA_rhodopsin-like	124	442	3.85e-33	NA	NA	NA
A	2	E_scolopes	ESCOL_cluster_5205	cluster_5205	PANTHER	PTHR24241	NA	121	450	9e-41	NA	NA	NA
A	2	E_scolopes	ESCOL_cluster_5205	cluster_5205	PRINTS	PR00237	Rhodopsin-like_GPCR_superfamily_signature	147	168	3.1e-14	IPR000276	G_protein-coupled_receptor,_rhodopsin-like	GO:0004930_GO:0007186_GO:0016021
A	2	E_scolopes	ESCOL_cluster_5205	cluster_5205	SUPERFAMILY	SSF81321	NA	93	315	7.96e-41	NA	NA	NA
A	2	E_scolopes	ESCOL_cluster_5205	cluster_5205	PRINTS	PR00237	Rhodopsin-like_GPCR_superfamily_signature	377	401	3.1e-14	IPR000276	G_protein-coupled_receptor,_rhodopsin-like	GO:0004930_GO:0007186_GO:0016021
A	2	E_scolopes	ESCOL_cluster_5205	cluster_5205	Pfam	PF00001	7_transmembrane_receptor_(rhodopsin_family)	130	438	7.5e-26	IPR000276	G_protein-coupled_receptor,_rhodopsin-like	GO:0004930_GO:0007186_GO:0016021
A	2	E_scolopes	ESCOL_cluster_5205	cluster_5205	PRINTS	PR00237	Rhodopsin-like_GPCR_superfamily_signature	420	446	3.1e-14	IPR000276	G_protein-coupled_receptor,_rhodopsin-like	GO:0004930_GO:0007186_GO:0016021
A	1	E_scolopes	ESCOL_cluster_6105	cluster_6105	SUPERFAMILY	SSF81321	NA	4	341	1.01e-45	NA	NA	NA
A	1	E_scolopes	ESCOL_cluster_6105	cluster_6105	Pfam	PF00001	7_transmembrane_receptor_(rhodopsin_family)	40	309	3e-28	IPR000276	G_protein-coupled_receptor,_rhodopsin-like	GO:0004930_GO:0007186_GO:0016021
A	1	E_scolopes	ESCOL_cluster_6105	cluster_6105	PRINTS	PR00237	Rhodopsin-like_GPCR_superfamily_signature	102	124	2.1e-17	IPR000276	G_protein-coupled_receptor,_rhodopsin-like	GO:0004930_GO:0007186_GO:0016021
A	1	E_scolopes	ESCOL_cluster_6105	cluster_6105	Gene3D	G3DSA:1.20.1070.10	NA	12	330	3.5e-47	NA	NA	NA
A	1	E_scolopes	ESCOL_cluster_6105	cluster_6105	PANTHER	PTHR24243	NA	26	340	3.3e-36	NA	NA	NA
A	1	E_scolopes	ESCOL_cluster_6105	cluster_6105	PRINTS	PR00237	Rhodopsin-like_GPCR_superfamily_signature	25	49	2.1e-17	IPR000276	G_protein-coupled_receptor,_rhodopsin-like	GO:0004930_GO:0007186_GO:0016021
A	1	E_scolopes	ESCOL_cluster_6105	cluster_6105	CDD	cd00637	7tm_classA_rhodopsin-like	27	313	1.77e-33	NA	NA	NA
A	1	E_scolopes	ESCOL_cluster_6105	cluster_6105	PRINTS	PR00237	Rhodopsin-like_GPCR_superfamily_signature	291	317	2.1e-17	IPR000276	G_protein-coupled_receptor,_rhodopsin-like	GO:0004930_GO:0007186_GO:0016021
A	1	E_scolopes	ESCOL_cluster_6105	cluster_6105	PRINTS	PR00237	Rhodopsin-like_GPCR_superfamily_signature	57	78	2.1e-17	IPR000276	G_protein-coupled_receptor,_rhodopsin-like	GO:0004930_GO:0007186_GO:0016021
B	3	E_scolopes	ESCOL_cluster_8002	cluster_8002	PANTHER	PTHR12011	NA	562	1101	2.4e-98	NA	NA	NA
B	3	E_scolopes	ESCOL_cluster_8002	cluster_8002	CDD	cd15040	7tmB2_Adhesion	811	1062	4.7e-94	NA	NA	NA
B	3	E_scolopes	ESCOL_cluster_8002	cluster_8002	PANTHER	PTHR12011:SF277	NA	562	1101	2.4e-98	NA	NA	NA
B	3	E_scolopes	ESCOL_cluster_8002	cluster_8002	Pfam	PF13855	Leucine_rich_repeat	126	185	2.2e-12	IPR001611	Leucine-rich_repeat	GO:0005515
B	3	E_scolopes	ESCOL_cluster_8002	cluster_8002	SUPERFAMILY	SSF81321	NA	801	1076	1.01e-13	NA	NA	NA
B	3	E_scolopes	ESCOL_cluster_8002	cluster_8002	Gene3D	G3DSA:3.80.10.10	NA	47	141	1.2e-21	IPR032675	Leucine-rich_repeat_domain_superfamily	NA
B	3	E_scolopes	ESCOL_cluster_8002	cluster_8002	Gene3D	G3DSA:2.60.220.50	NA	612	805	7.4e-27	NA	NA	NA
B	3	E_scolopes	ESCOL_cluster_8002	cluster_8002	SUPERFAMILY	SSF52058	NA	75	208	1.16e-31	NA	NA	NA
B	3	E_scolopes	ESCOL_cluster_8002	cluster_8002	Pfam	PF00002	7_transmembrane_receptor_(Secretin_family)	813	1049	8.2e-38	IPR000832	GPCR,_family_2,_secretin-like	GO:0004930_GO:0007186_GO:0016021
B	3	E_scolopes	ESCOL_cluster_8002	cluster_8002	Gene3D	G3DSA:1.20.1070.10	NA	806	1091	7.5e-71	NA	NA	NA
B	3	E_scolopes	ESCOL_cluster_8002	cluster_8002	SMART	SM00303	NA	750	802	4.3e-11	IPR000203	GPS_motif	NA
B	3	E_scolopes	ESCOL_cluster_8002	cluster_8002	Pfam	PF01825	GPCR_proteolysis_site,_GPS,_motif	752	796	4.1e-11	IPR000203	GPS_motif	NA
B	3	E_scolopes	ESCOL_cluster_8002	cluster_8002	PRINTS	PR00249	Secretin-like_GPCR_superfamily_signature	816	840	1.1e-11	IPR000832	GPCR,_family_2,_secretin-like	GO:0004930_GO:0007186_GO:0016021
B	3	E_scolopes	ESCOL_cluster_8002	cluster_8002	PRINTS	PR00249	Secretin-like_GPCR_superfamily_signature	1035	1056	1.1e-11	IPR000832	GPCR,_family_2,_secretin-like	GO:0004930_GO:0007186_GO:0016021
B	3	E_scolopes	ESCOL_cluster_8002	cluster_8002	PRINTS	PR00249	Secretin-like_GPCR_superfamily_signature	882	905	1.1e-11	IPR000832	GPCR,_family_2,_secretin-like	GO:0004930_GO:0007186_GO:0016021
B	3	E_scolopes	ESCOL_cluster_8002	cluster_8002	PRINTS	PR00249	Secretin-like_GPCR_superfamily_signature	964	989	1.1e-11	IPR000832	GPCR,_family_2,_secretin-like	GO:0004930_GO:0007186_GO:0016021
B	3	E_scolopes	ESCOL_cluster_8002	cluster_8002	Gene3D	G3DSA:3.80.10.10	NA	142	281	4.3e-12	IPR032675	Leucine-rich_repeat_domain_superfamily	NA
A	1	E_scolopes	ESCOL_cluster_8641	cluster_8641	PRINTS	PR00237	Rhodopsin-like_GPCR_superfamily_signature	100	122	5.5e-17	IPR000276	G_protein-coupled_receptor,_rhodopsin-like	GO:0004930_GO:0007186_GO:0016021
A	1	E_scolopes	ESCOL_cluster_8641	cluster_8641	Gene3D	G3DSA:1.20.1070.10	NA	3	336	3.2e-42	NA	NA	NA
A	1	E_scolopes	ESCOL_cluster_8641	cluster_8641	SUPERFAMILY	SSF81321	NA	18	333	6.32e-38	NA	NA	NA
A	1	E_scolopes	ESCOL_cluster_8641	cluster_8641	PANTHER	PTHR14369	NA	407	633	1.3e-47	IPR007019	Surfeit_locus_6	NA
A	1	E_scolopes	ESCOL_cluster_8641	cluster_8641	PRINTS	PR00237	Rhodopsin-like_GPCR_superfamily_signature	23	47	5.5e-17	IPR000276	G_protein-coupled_receptor,_rhodopsin-like	GO:0004930_GO:0007186_GO:0016021
A	1	E_scolopes	ESCOL_cluster_8641	cluster_8641	PRINTS	PR00237	Rhodopsin-like_GPCR_superfamily_signature	287	313	5.5e-17	IPR000276	G_protein-coupled_receptor,_rhodopsin-like	GO:0004930_GO:0007186_GO:0016021
A	1	E_scolopes	ESCOL_cluster_8641	cluster_8641	CDD	cd00637	7tm_classA_rhodopsin-like	26	309	1.43e-43	NA	NA	NA
A	1	E_scolopes	ESCOL_cluster_8641	cluster_8641	PRINTS	PR00237	Rhodopsin-like_GPCR_superfamily_signature	246	270	5.5e-17	IPR000276	G_protein-coupled_receptor,_rhodopsin-like	GO:0004930_GO:0007186_GO:0016021
A	1	E_scolopes	ESCOL_cluster_8641	cluster_8641	PRINTS	PR00237	Rhodopsin-like_GPCR_superfamily_signature	187	210	5.5e-17	IPR000276	G_protein-coupled_receptor,_rhodopsin-like	GO:0004930_GO:0007186_GO:0016021
A	1	E_scolopes	ESCOL_cluster_8641	cluster_8641	PRINTS	PR00237	Rhodopsin-like_GPCR_superfamily_signature	55	76	5.5e-17	IPR000276	G_protein-coupled_receptor,_rhodopsin-like	GO:0004930_GO:0007186_GO:0016021
A	1	E_scolopes	ESCOL_cluster_8641	cluster_8641	Pfam	PF04935	Surfeit_locus_protein_6	439	622	1.9e-34	IPR029190	Ribosomal_RNA-processing_protein_14/surfeit_locus_protein_6,_C-terminal_domain	NA
A	1	E_scolopes	ESCOL_cluster_8641	cluster_8641	Pfam	PF00001	7_transmembrane_receptor_(rhodopsin_family)	38	305	1.5e-21	IPR000276	G_protein-coupled_receptor,_rhodopsin-like	GO:0004930_GO:0007186_GO:0016021
A	1	E_scolopes	ESCOL_cluster_9016	cluster_9016	SUPERFAMILY	SSF81321	NA	6	332	3.3e-45	NA	NA	NA
A	1	E_scolopes	ESCOL_cluster_9016	cluster_9016	Gene3D	G3DSA:1.20.1070.10	NA	10	333	2.4e-47	NA	NA	NA
A	1	E_scolopes	ESCOL_cluster_9016	cluster_9016	PRINTS	PR00237	Rhodopsin-like_GPCR_superfamily_signature	291	317	1.1e-17	IPR000276	G_protein-coupled_receptor,_rhodopsin-like	GO:0004930_GO:0007186_GO:0016021
A	1	E_scolopes	ESCOL_cluster_9016	cluster_9016	PRINTS	PR00237	Rhodopsin-like_GPCR_superfamily_signature	27	51	1.1e-17	IPR000276	G_protein-coupled_receptor,_rhodopsin-like	GO:0004930_GO:0007186_GO:0016021
A	1	E_scolopes	ESCOL_cluster_9016	cluster_9016	CDD	cd00637	7tm_classA_rhodopsin-like	30	311	1.88e-27	NA	NA	NA
A	1	E_scolopes	ESCOL_cluster_9016	cluster_9016	PRINTS	PR00237	Rhodopsin-like_GPCR_superfamily_signature	59	80	1.1e-17	IPR000276	G_protein-coupled_receptor,_rhodopsin-like	GO:0004930_GO:0007186_GO:0016021
A	1	E_scolopes	ESCOL_cluster_9016	cluster_9016	PRINTS	PR00237	Rhodopsin-like_GPCR_superfamily_signature	104	126	1.1e-17	IPR000276	G_protein-coupled_receptor,_rhodopsin-like	GO:0004930_GO:0007186_GO:0016021
A	1	E_scolopes	ESCOL_cluster_9016	cluster_9016	PRINTS	PR00237	Rhodopsin-like_GPCR_superfamily_signature	250	274	1.1e-17	IPR000276	G_protein-coupled_receptor,_rhodopsin-like	GO:0004930_GO:0007186_GO:0016021
A	1	E_scolopes	ESCOL_cluster_9016	cluster_9016	Pfam	PF00001	7_transmembrane_receptor_(rhodopsin_family)	42	309	1.8e-24	IPR000276	G_protein-coupled_receptor,_rhodopsin-like	GO:0004930_GO:0007186_GO:0016021
A	1	E_scolopes	ESCOL_cluster_9016	cluster_9016	PANTHER	PTHR24229	NA	7	323	5.9e-38	NA	NA	NA
A	1	O_bimaculoides	A0A0L8G2D5_A0A0L8G2D5_OCTBM	Ocbimv22001500m	PRINTS	PR00237	Rhodopsin-like_GPCR_superfamily_signature	385	411	3.5e-17	IPR000276	G_protein-coupled_receptor,_rhodopsin-like	GO:0004930_GO:0007186_GO:0016021
A	1	O_bimaculoides	A0A0L8G2D5_A0A0L8G2D5_OCTBM	Ocbimv22001500m	PRINTS	PR00237	Rhodopsin-like_GPCR_superfamily_signature	66	87	3.5e-17	IPR000276	G_protein-coupled_receptor,_rhodopsin-like	GO:0004930_GO:0007186_GO:0016021
A	1	O_bimaculoides	A0A0L8G2D5_A0A0L8G2D5_OCTBM	Ocbimv22001500m	PRINTS	PR00237	Rhodopsin-like_GPCR_superfamily_signature	343	367	3.5e-17	IPR000276	G_protein-coupled_receptor,_rhodopsin-like	GO:0004930_GO:0007186_GO:0016021
A	1	O_bimaculoides	A0A0L8G2D5_A0A0L8G2D5_OCTBM	Ocbimv22001500m	PRINTS	PR00237	Rhodopsin-like_GPCR_superfamily_signature	34	58	3.5e-17	IPR000276	G_protein-coupled_receptor,_rhodopsin-like	GO:0004930_GO:0007186_GO:0016021
A	1	O_bimaculoides	A0A0L8G2D5_A0A0L8G2D5_OCTBM	Ocbimv22001500m	PANTHER	PTHR24241	NA	27	418	4.8e-38	NA	NA	NA
A	1	O_bimaculoides	A0A0L8G2D5_A0A0L8G2D5_OCTBM	Ocbimv22001500m	SUPERFAMILY	SSF81321	NA	10	231	2.75e-47	NA	NA	NA
A	1	O_bimaculoides	A0A0L8G2D5_A0A0L8G2D5_OCTBM	Ocbimv22001500m	CDD	cd00637	7tm_classA_rhodopsin-like	36	407	9.01e-27	NA	NA	NA
A	1	O_bimaculoides	A0A0L8G2D5_A0A0L8G2D5_OCTBM	Ocbimv22001500m	Pfam	PF00001	7_transmembrane_receptor_(rhodopsin_family)	49	403	7e-31	IPR000276	G_protein-coupled_receptor,_rhodopsin-like	GO:0004930_GO:0007186_GO:0016021
A	1	O_bimaculoides	A0A0L8G2D5_A0A0L8G2D5_OCTBM	Ocbimv22001500m	PRINTS	PR00237	Rhodopsin-like_GPCR_superfamily_signature	111	133	3.5e-17	IPR000276	G_protein-coupled_receptor,_rhodopsin-like	GO:0004930_GO:0007186_GO:0016021
A	1	O_bimaculoides	A0A0L8G2D5_A0A0L8G2D5_OCTBM	Ocbimv22001500m	SUPERFAMILY	SSF81321	NA	329	421	2.75e-47	NA	NA	NA
A	1	O_bimaculoides	A0A0L8G2D5_A0A0L8G2D5_OCTBM	Ocbimv22001500m	Gene3D	G3DSA:1.20.1070.10	NA	285	423	1.3e-16	NA	NA	NA
A	1	O_bimaculoides	A0A0L8G2D5_A0A0L8G2D5_OCTBM	Ocbimv22001500m	Gene3D	G3DSA:1.20.1070.10	NA	6	259	3.3e-33	NA	NA	NA
A	1	O_bimaculoides	A0A0L8G1V2_A0A0L8G1V2_OCTBM	Ocbimv22001825m	PRINTS	PR00237	Rhodopsin-like_GPCR_superfamily_signature	104	126	3.1e-22	IPR000276	G_protein-coupled_receptor,_rhodopsin-like	GO:0004930_GO:0007186_GO:0016021
A	1	O_bimaculoides	A0A0L8G1V2_A0A0L8G1V2_OCTBM	Ocbimv22001825m	PRINTS	PR00237	Rhodopsin-like_GPCR_superfamily_signature	59	80	3.1e-22	IPR000276	G_protein-coupled_receptor,_rhodopsin-like	GO:0004930_GO:0007186_GO:0016021
A	1	O_bimaculoides	A0A0L8G1V2_A0A0L8G1V2_OCTBM	Ocbimv22001825m	PRINTS	PR00237	Rhodopsin-like_GPCR_superfamily_signature	27	51	3.1e-22	IPR000276	G_protein-coupled_receptor,_rhodopsin-like	GO:0004930_GO:0007186_GO:0016021
A	1	O_bimaculoides	A0A0L8G1V2_A0A0L8G1V2_OCTBM	Ocbimv22001825m	PRINTS	PR00237	Rhodopsin-like_GPCR_superfamily_signature	192	215	3.1e-22	IPR000276	G_protein-coupled_receptor,_rhodopsin-like	GO:0004930_GO:0007186_GO:0016021
A	1	O_bimaculoides	A0A0L8G1V2_A0A0L8G1V2_OCTBM	Ocbimv22001825m	PRINTS	PR00237	Rhodopsin-like_GPCR_superfamily_signature	293	319	3.1e-22	IPR000276	G_protein-coupled_receptor,_rhodopsin-like	GO:0004930_GO:0007186_GO:0016021
A	1	O_bimaculoides	A0A0L8G1V2_A0A0L8G1V2_OCTBM	Ocbimv22001825m	Gene3D	G3DSA:1.20.1070.10	NA	18	334	9e-53	NA	NA	NA
A	1	O_bimaculoides	A0A0L8G1V2_A0A0L8G1V2_OCTBM	Ocbimv22001825m	CDD	cd00637	7tm_classA_rhodopsin-like	29	315	3e-32	NA	NA	NA
A	1	O_bimaculoides	A0A0L8G1V2_A0A0L8G1V2_OCTBM	Ocbimv22001825m	SUPERFAMILY	SSF81321	NA	26	335	2.75e-45	NA	NA	NA
A	1	O_bimaculoides	A0A0L8G1V2_A0A0L8G1V2_OCTBM	Ocbimv22001825m	PRINTS	PR00237	Rhodopsin-like_GPCR_superfamily_signature	252	276	3.1e-22	IPR000276	G_protein-coupled_receptor,_rhodopsin-like	GO:0004930_GO:0007186_GO:0016021
A	1	O_bimaculoides	A0A0L8G1V2_A0A0L8G1V2_OCTBM	Ocbimv22001825m	Pfam	PF00001	7_transmembrane_receptor_(rhodopsin_family)	42	311	5.9e-30	IPR000276	G_protein-coupled_receptor,_rhodopsin-like	GO:0004930_GO:0007186_GO:0016021
A	1	O_bimaculoides	A0A0L8G1V2_A0A0L8G1V2_OCTBM	Ocbimv22001825m	PANTHER	PTHR24243	NA	26	325	1.7e-42	NA	NA	NA
A	2	O_bimaculoides	A0A0L8HXR3_A0A0L8HXR3_OCTBM	Ocbimv22002970m	Gene3D	G3DSA:1.20.1070.10	NA	49	389	1.9e-45	NA	NA	NA
A	2	O_bimaculoides	A0A0L8HXR3_A0A0L8HXR3_OCTBM	Ocbimv22002970m	Pfam	PF00001	7_transmembrane_receptor_(rhodopsin_family)	74	365	3.7e-24	IPR000276	G_protein-coupled_receptor,_rhodopsin-like	GO:0004930_GO:0007186_GO:0016021
A	2	O_bimaculoides	A0A0L8HXR3_A0A0L8HXR3_OCTBM	Ocbimv22002970m	SUPERFAMILY	SSF81321	NA	295	387	2.56e-38	NA	NA	NA
A	2	O_bimaculoides	A0A0L8HXR3_A0A0L8HXR3_OCTBM	Ocbimv22002970m	SUPERFAMILY	SSF81321	NA	37	256	2.56e-38	NA	NA	NA
A	2	O_bimaculoides	A0A0L8HXR3_A0A0L8HXR3_OCTBM	Ocbimv22002970m	PRINTS	PR00237	Rhodopsin-like_GPCR_superfamily_signature	136	158	3.2e-17	IPR000276	G_protein-coupled_receptor,_rhodopsin-like	GO:0004930_GO:0007186_GO:0016021
A	2	O_bimaculoides	A0A0L8HXR3_A0A0L8HXR3_OCTBM	Ocbimv22002970m	CDD	cd00637	7tm_classA_rhodopsin-like	61	368	5.98e-28	NA	NA	NA
A	2	O_bimaculoides	A0A0L8HXR3_A0A0L8HXR3_OCTBM	Ocbimv22002970m	PANTHER	PTHR24241	NA	57	378	1.4e-39	NA	NA	NA
A	2	O_bimaculoides	A0A0L8HXR3_A0A0L8HXR3_OCTBM	Ocbimv22002970m	PRINTS	PR00237	Rhodopsin-like_GPCR_superfamily_signature	304	328	3.2e-17	IPR000276	G_protein-coupled_receptor,_rhodopsin-like	GO:0004930_GO:0007186_GO:0016021
A	2	O_bimaculoides	A0A0L8HXR3_A0A0L8HXR3_OCTBM	Ocbimv22002970m	PRINTS	PR00237	Rhodopsin-like_GPCR_superfamily_signature	59	83	3.2e-17	IPR000276	G_protein-coupled_receptor,_rhodopsin-like	GO:0004930_GO:0007186_GO:0016021
A	2	O_bimaculoides	A0A0L8HXR3_A0A0L8HXR3_OCTBM	Ocbimv22002970m	PRINTS	PR00237	Rhodopsin-like_GPCR_superfamily_signature	347	373	3.2e-17	IPR000276	G_protein-coupled_receptor,_rhodopsin-like	GO:0004930_GO:0007186_GO:0016021
A	2	O_bimaculoides	A0A0L8HXR3_A0A0L8HXR3_OCTBM	Ocbimv22002970m	PRINTS	PR00237	Rhodopsin-like_GPCR_superfamily_signature	91	112	3.2e-17	IPR000276	G_protein-coupled_receptor,_rhodopsin-like	GO:0004930_GO:0007186_GO:0016021
A	2	O_bimaculoides	A0A0L8HZ00_A0A0L8HZ00_OCTBM	Ocbimv22002972m	PANTHER	PTHR24243	NA	31	356	1.2e-30	NA	NA	NA
A	2	O_bimaculoides	A0A0L8HZ00_A0A0L8HZ00_OCTBM	Ocbimv22002972m	Pfam	PF00001	7_transmembrane_receptor_(rhodopsin_family)	59	340	2.5e-20	IPR000276	G_protein-coupled_receptor,_rhodopsin-like	GO:0004930_GO:0007186_GO:0016021
A	2	O_bimaculoides	A0A0L8HZ00_A0A0L8HZ00_OCTBM	Ocbimv22002972m	PRINTS	PR00237	Rhodopsin-like_GPCR_superfamily_signature	107	129	2.3e-11	IPR000276	G_protein-coupled_receptor,_rhodopsin-like	GO:0004930_GO:0007186_GO:0016021
A	2	O_bimaculoides	A0A0L8HZ00_A0A0L8HZ00_OCTBM	Ocbimv22002972m	CDD	cd00637	7tm_classA_rhodopsin-like	60	344	5.42e-22	NA	NA	NA
A	2	O_bimaculoides	A0A0L8HZ00_A0A0L8HZ00_OCTBM	Ocbimv22002972m	PRINTS	PR00237	Rhodopsin-like_GPCR_superfamily_signature	30	54	2.3e-11	IPR000276	G_protein-coupled_receptor,_rhodopsin-like	GO:0004930_GO:0007186_GO:0016021
A	2	O_bimaculoides	A0A0L8HZ00_A0A0L8HZ00_OCTBM	Ocbimv22002972m	SUPERFAMILY	SSF81321	NA	24	238	6.41e-36	NA	NA	NA
A	2	O_bimaculoides	A0A0L8HZ00_A0A0L8HZ00_OCTBM	Ocbimv22002972m	PRINTS	PR00237	Rhodopsin-like_GPCR_superfamily_signature	62	83	2.3e-11	IPR000276	G_protein-coupled_receptor,_rhodopsin-like	GO:0004930_GO:0007186_GO:0016021
A	2	O_bimaculoides	A0A0L8HZ00_A0A0L8HZ00_OCTBM	Ocbimv22002972m	PRINTS	PR00237	Rhodopsin-like_GPCR_superfamily_signature	322	348	2.3e-11	IPR000276	G_protein-coupled_receptor,_rhodopsin-like	GO:0004930_GO:0007186_GO:0016021
A	2	O_bimaculoides	A0A0L8HZ00_A0A0L8HZ00_OCTBM	Ocbimv22002972m	SUPERFAMILY	SSF81321	NA	275	359	6.41e-36	NA	NA	NA
A	2	O_bimaculoides	A0A0L8HXU1_A0A0L8HXU1_OCTBM	Ocbimv22002974m	PRINTS	PR00237	Rhodopsin-like_GPCR_superfamily_signature	64	85	3.4e-16	IPR000276	G_protein-coupled_receptor,_rhodopsin-like	GO:0004930_GO:0007186_GO:0016021
A	2	O_bimaculoides	A0A0L8HXU1_A0A0L8HXU1_OCTBM	Ocbimv22002974m	PANTHER	PTHR24241	NA	35	368	3.7e-42	NA	NA	NA
A	2	O_bimaculoides	A0A0L8HXU1_A0A0L8HXU1_OCTBM	Ocbimv22002974m	PRINTS	PR00237	Rhodopsin-like_GPCR_superfamily_signature	109	131	3.4e-16	IPR000276	G_protein-coupled_receptor,_rhodopsin-like	GO:0004930_GO:0007186_GO:0016021
A	2	O_bimaculoides	A0A0L8HXU1_A0A0L8HXU1_OCTBM	Ocbimv22002974m	SUPERFAMILY	SSF81321	NA	284	380	7.78e-41	NA	NA	NA
A	2	O_bimaculoides	A0A0L8HXU1_A0A0L8HXU1_OCTBM	Ocbimv22002974m	PRINTS	PR00237	Rhodopsin-like_GPCR_superfamily_signature	295	319	3.4e-16	IPR000276	G_protein-coupled_receptor,_rhodopsin-like	GO:0004930_GO:0007186_GO:0016021
A	2	O_bimaculoides	A0A0L8HXU1_A0A0L8HXU1_OCTBM	Ocbimv22002974m	SUPERFAMILY	SSF81321	NA	30	229	7.78e-41	NA	NA	NA
A	2	O_bimaculoides	A0A0L8HXU1_A0A0L8HXU1_OCTBM	Ocbimv22002974m	PRINTS	PR00237	Rhodopsin-like_GPCR_superfamily_signature	338	364	3.4e-16	IPR000276	G_protein-coupled_receptor,_rhodopsin-like	GO:0004930_GO:0007186_GO:0016021
A	2	O_bimaculoides	A0A0L8HXU1_A0A0L8HXU1_OCTBM	Ocbimv22002974m	CDD	cd00637	7tm_classA_rhodopsin-like	33	360	5.25e-32	NA	NA	NA
A	2	O_bimaculoides	A0A0L8HXU1_A0A0L8HXU1_OCTBM	Ocbimv22002974m	Pfam	PF00001	7_transmembrane_receptor_(rhodopsin_family)	47	356	4.1e-28	IPR000276	G_protein-coupled_receptor,_rhodopsin-like	GO:0004930_GO:0007186_GO:0016021
A	2	O_bimaculoides	A0A0L8HXU1_A0A0L8HXU1_OCTBM	Ocbimv22002974m	Gene3D	G3DSA:1.20.1070.10	NA	22	371	1e-50	NA	NA	NA
A	2	O_bimaculoides	A0A0L8HXU1_A0A0L8HXU1_OCTBM	Ocbimv22002974m	PRINTS	PR00237	Rhodopsin-like_GPCR_superfamily_signature	32	56	3.4e-16	IPR000276	G_protein-coupled_receptor,_rhodopsin-like	GO:0004930_GO:0007186_GO:0016021
A	1	O_bimaculoides	A0A0L8HWJ7_A0A0L8HWJ7_OCTBM	Ocbimv22004001m	PRINTS	PR00237	Rhodopsin-like_GPCR_superfamily_signature	22	46	3.6e-21	IPR000276	G_protein-coupled_receptor,_rhodopsin-like	GO:0004930_GO:0007186_GO:0016021
A	1	O_bimaculoides	A0A0L8HWJ7_A0A0L8HWJ7_OCTBM	Ocbimv22004001m	PANTHER	PTHR24249:SF372	NA	21	315	4e-34	NA	NA	NA
A	1	O_bimaculoides	A0A0L8HWJ7_A0A0L8HWJ7_OCTBM	Ocbimv22004001m	PRINTS	PR00237	Rhodopsin-like_GPCR_superfamily_signature	54	75	3.6e-21	IPR000276	G_protein-coupled_receptor,_rhodopsin-like	GO:0004930_GO:0007186_GO:0016021
A	1	O_bimaculoides	A0A0L8HWJ7_A0A0L8HWJ7_OCTBM	Ocbimv22004001m	CDD	cd00637	7tm_classA_rhodopsin-like	24	304	2.59e-21	NA	NA	NA
A	1	O_bimaculoides	A0A0L8HWJ7_A0A0L8HWJ7_OCTBM	Ocbimv22004001m	Pfam	PF00001	7_transmembrane_receptor_(rhodopsin_family)	37	300	1.5e-24	IPR000276	G_protein-coupled_receptor,_rhodopsin-like	GO:0004930_GO:0007186_GO:0016021
A	1	O_bimaculoides	A0A0L8HWJ7_A0A0L8HWJ7_OCTBM	Ocbimv22004001m	SUPERFAMILY	SSF81321	NA	18	316	7.51e-40	NA	NA	NA
A	1	O_bimaculoides	A0A0L8HWJ7_A0A0L8HWJ7_OCTBM	Ocbimv22004001m	PANTHER	PTHR24249	NA	21	315	4e-34	NA	NA	NA
A	1	O_bimaculoides	A0A0L8HWJ7_A0A0L8HWJ7_OCTBM	Ocbimv22004001m	Gene3D	G3DSA:1.20.1070.10	NA	2	317	1.2e-42	NA	NA	NA
A	1	O_bimaculoides	A0A0L8HWJ7_A0A0L8HWJ7_OCTBM	Ocbimv22004001m	PRINTS	PR00237	Rhodopsin-like_GPCR_superfamily_signature	185	208	3.6e-21	IPR000276	G_protein-coupled_receptor,_rhodopsin-like	GO:0004930_GO:0007186_GO:0016021
A	1	O_bimaculoides	A0A0L8HWJ7_A0A0L8HWJ7_OCTBM	Ocbimv22004001m	PRINTS	PR00237	Rhodopsin-like_GPCR_superfamily_signature	242	266	3.6e-21	IPR000276	G_protein-coupled_receptor,_rhodopsin-like	GO:0004930_GO:0007186_GO:0016021
A	1	O_bimaculoides	A0A0L8HWJ7_A0A0L8HWJ7_OCTBM	Ocbimv22004001m	PRINTS	PR00237	Rhodopsin-like_GPCR_superfamily_signature	99	121	3.6e-21	IPR000276	G_protein-coupled_receptor,_rhodopsin-like	GO:0004930_GO:0007186_GO:0016021
A	1	O_bimaculoides	A0A0L8HWJ7_A0A0L8HWJ7_OCTBM	Ocbimv22004001m	PRINTS	PR00237	Rhodopsin-like_GPCR_superfamily_signature	282	308	3.6e-21	IPR000276	G_protein-coupled_receptor,_rhodopsin-like	GO:0004930_GO:0007186_GO:0016021
A	1	O_bimaculoides	A0A0L8HWH5_A0A0L8HWH5_OCTBM	Ocbimv22004002m	Gene3D	G3DSA:1.20.1070.10	NA	8	319	2.2e-50	NA	NA	NA
A	1	O_bimaculoides	A0A0L8HWH5_A0A0L8HWH5_OCTBM	Ocbimv22004002m	PRINTS	PR00237	Rhodopsin-like_GPCR_superfamily_signature	22	46	1.3e-20	IPR000276	G_protein-coupled_receptor,_rhodopsin-like	GO:0004930_GO:0007186_GO:0016021
A	1	O_bimaculoides	A0A0L8HWH5_A0A0L8HWH5_OCTBM	Ocbimv22004002m	PRINTS	PR00237	Rhodopsin-like_GPCR_superfamily_signature	54	75	1.3e-20	IPR000276	G_protein-coupled_receptor,_rhodopsin-like	GO:0004930_GO:0007186_GO:0016021
A	1	O_bimaculoides	A0A0L8HWH5_A0A0L8HWH5_OCTBM	Ocbimv22004002m	CDD	cd00637	7tm_classA_rhodopsin-like	24	301	1.3e-29	NA	NA	NA
A	1	O_bimaculoides	A0A0L8HWH5_A0A0L8HWH5_OCTBM	Ocbimv22004002m	PRINTS	PR00237	Rhodopsin-like_GPCR_superfamily_signature	179	202	1.3e-20	IPR000276	G_protein-coupled_receptor,_rhodopsin-like	GO:0004930_GO:0007186_GO:0016021
A	1	O_bimaculoides	A0A0L8HWH5_A0A0L8HWH5_OCTBM	Ocbimv22004002m	PRINTS	PR00237	Rhodopsin-like_GPCR_superfamily_signature	279	305	1.3e-20	IPR000276	G_protein-coupled_receptor,_rhodopsin-like	GO:0004930_GO:0007186_GO:0016021
A	1	O_bimaculoides	A0A0L8HWH5_A0A0L8HWH5_OCTBM	Ocbimv22004002m	PANTHER	PTHR43919	NA	21	333	3.8e-38	NA	NA	NA
A	1	O_bimaculoides	A0A0L8HWH5_A0A0L8HWH5_OCTBM	Ocbimv22004002m	SUPERFAMILY	SSF81321	NA	17	333	2.2e-45	NA	NA	NA
A	1	O_bimaculoides	A0A0L8HWH5_A0A0L8HWH5_OCTBM	Ocbimv22004002m	PRINTS	PR00237	Rhodopsin-like_GPCR_superfamily_signature	238	262	1.3e-20	IPR000276	G_protein-coupled_receptor,_rhodopsin-like	GO:0004930_GO:0007186_GO:0016021
A	1	O_bimaculoides	A0A0L8HWH5_A0A0L8HWH5_OCTBM	Ocbimv22004002m	Pfam	PF00001	7_transmembrane_receptor_(rhodopsin_family)	37	297	4.4e-31	IPR000276	G_protein-coupled_receptor,_rhodopsin-like	GO:0004930_GO:0007186_GO:0016021
A	1	O_bimaculoides	A0A0L8HWH5_A0A0L8HWH5_OCTBM	Ocbimv22004002m	PRINTS	PR00237	Rhodopsin-like_GPCR_superfamily_signature	133	154	1.3e-20	IPR000276	G_protein-coupled_receptor,_rhodopsin-like	GO:0004930_GO:0007186_GO:0016021
A	1	O_bimaculoides	A0A0L8HWH5_A0A0L8HWH5_OCTBM	Ocbimv22004002m	PRINTS	PR00237	Rhodopsin-like_GPCR_superfamily_signature	99	121	1.3e-20	IPR000276	G_protein-coupled_receptor,_rhodopsin-like	GO:0004930_GO:0007186_GO:0016021
A	1	O_bimaculoides	A0A0L8HWH5_A0A0L8HWH5_OCTBM	Ocbimv22004002m	PANTHER	PTHR43919:SF3	NA	21	333	3.8e-38	NA	NA	NA
A	2	O_bimaculoides	A0A0L8HmH5_A0A0L8HmH5_OCTBM	Ocbimv22006236m	Pfam	PF00001	7_transmembrane_receptor_(rhodopsin_family)	44	362	6.5e-25	IPR000276	G_protein-coupled_receptor,_rhodopsin-like	GO:0004930_GO:0007186_GO:0016021
A	2	O_bimaculoides	A0A0L8HmH5_A0A0L8HmH5_OCTBM	Ocbimv22006236m	SUPERFAMILY	SSF81321	NA	297	385	1.1e-42	NA	NA	NA
A	2	O_bimaculoides	A0A0L8HmH5_A0A0L8HmH5_OCTBM	Ocbimv22006236m	PRINTS	PR00237	Rhodopsin-like_GPCR_superfamily_signature	301	325	2.5e-13	IPR000276	G_protein-coupled_receptor,_rhodopsin-like	GO:0004930_GO:0007186_GO:0016021
A	2	O_bimaculoides	A0A0L8HmH5_A0A0L8HmH5_OCTBM	Ocbimv22006236m	SUPERFAMILY	SSF81321	NA	11	235	1.1e-42	NA	NA	NA
A	2	O_bimaculoides	A0A0L8HmH5_A0A0L8HmH5_OCTBM	Ocbimv22006236m	PRINTS	PR00237	Rhodopsin-like_GPCR_superfamily_signature	29	53	2.5e-13	IPR000276	G_protein-coupled_receptor,_rhodopsin-like	GO:0004930_GO:0007186_GO:0016021
A	2	O_bimaculoides	A0A0L8HmH5_A0A0L8HmH5_OCTBM	Ocbimv22006236m	PRINTS	PR00237	Rhodopsin-like_GPCR_superfamily_signature	344	370	2.5e-13	IPR000276	G_protein-coupled_receptor,_rhodopsin-like	GO:0004930_GO:0007186_GO:0016021
A	2	O_bimaculoides	A0A0L8HmH5_A0A0L8HmH5_OCTBM	Ocbimv22006236m	PRINTS	PR00237	Rhodopsin-like_GPCR_superfamily_signature	61	82	2.5e-13	IPR000276	G_protein-coupled_receptor,_rhodopsin-like	GO:0004930_GO:0007186_GO:0016021
A	2	O_bimaculoides	A0A0L8HmH5_A0A0L8HmH5_OCTBM	Ocbimv22006236m	CDD	cd00637	7tm_classA_rhodopsin-like	31	366	2.64e-23	NA	NA	NA
A	2	O_bimaculoides	A0A0L8HmH5_A0A0L8HmH5_OCTBM	Ocbimv22006236m	Gene3D	G3DSA:1.20.1070.10	NA	18	377	1.5e-46	NA	NA	NA
A	2	O_bimaculoides	A0A0L8HmH5_A0A0L8HmH5_OCTBM	Ocbimv22006236m	PRINTS	PR00237	Rhodopsin-like_GPCR_superfamily_signature	106	128	2.5e-13	IPR000276	G_protein-coupled_receptor,_rhodopsin-like	GO:0004930_GO:0007186_GO:0016021
A	2	O_bimaculoides	A0A0L8HmH5_A0A0L8HmH5_OCTBM	Ocbimv22006236m	PANTHER	PTHR24241	NA	29	377	5.7e-35	NA	NA	NA
A	2	O_bimaculoides	A0A0L8HmN7_A0A0L8HmN7_OCTBM	Ocbimv22006261m	PRINTS	PR00237	Rhodopsin-like_GPCR_superfamily_signature	343	367	7.2e-14	IPR000276	G_protein-coupled_receptor,_rhodopsin-like	GO:0004930_GO:0007186_GO:0016021
A	2	O_bimaculoides	A0A0L8HmN7_A0A0L8HmN7_OCTBM	Ocbimv22006261m	SUPERFAMILY	SSF81321	NA	326	424	2.2e-29	NA	NA	NA
A	2	O_bimaculoides	A0A0L8HmN7_A0A0L8HmN7_OCTBM	Ocbimv22006261m	PRINTS	PR00237	Rhodopsin-like_GPCR_superfamily_signature	386	412	7.2e-14	IPR000276	G_protein-coupled_receptor,_rhodopsin-like	GO:0004930_GO:0007186_GO:0016021
A	2	O_bimaculoides	A0A0L8HmN7_A0A0L8HmN7_OCTBM	Ocbimv22006261m	PRINTS	PR00237	Rhodopsin-like_GPCR_superfamily_signature	182	204	7.2e-14	IPR000276	G_protein-coupled_receptor,_rhodopsin-like	GO:0004930_GO:0007186_GO:0016021
A	2	O_bimaculoides	A0A0L8HmN7_A0A0L8HmN7_OCTBM	Ocbimv22006261m	CDD	cd00637	7tm_classA_rhodopsin-like	106	407	7.93e-22	NA	NA	NA
A	2	O_bimaculoides	A0A0L8HmN7_A0A0L8HmN7_OCTBM	Ocbimv22006261m	Pfam	PF00001	7_transmembrane_receptor_(rhodopsin_family)	120	404	8.5e-25	IPR000276	G_protein-coupled_receptor,_rhodopsin-like	GO:0004930_GO:0007186_GO:0016021
A	2	O_bimaculoides	A0A0L8HmN7_A0A0L8HmN7_OCTBM	Ocbimv22006261m	PANTHER	PTHR24243:SF148	NA	105	420	8e-31	NA	NA	NA
A	2	O_bimaculoides	A0A0L8HmN7_A0A0L8HmN7_OCTBM	Ocbimv22006261m	Gene3D	G3DSA:1.20.1070.10	NA	93	427	1.2e-38	NA	NA	NA
A	2	O_bimaculoides	A0A0L8HmN7_A0A0L8HmN7_OCTBM	Ocbimv22006261m	SUPERFAMILY	SSF81321	NA	102	299	2.2e-29	NA	NA	NA
A	2	O_bimaculoides	A0A0L8HmN7_A0A0L8HmN7_OCTBM	Ocbimv22006261m	PANTHER	PTHR24243	NA	105	420	8e-31	NA	NA	NA
A	2	O_bimaculoides	A0A0L8HmN7_A0A0L8HmN7_OCTBM	Ocbimv22006261m	PRINTS	PR00237	Rhodopsin-like_GPCR_superfamily_signature	137	158	7.2e-14	IPR000276	G_protein-coupled_receptor,_rhodopsin-like	GO:0004930_GO:0007186_GO:0016021
A	2	O_bimaculoides	A0A0L8HmK0_A0A0L8HmK0_OCTBM	Ocbimv22006262m	CDD	cd00637	7tm_classA_rhodopsin-like	28	338	1.21e-29	NA	NA	NA
A	2	O_bimaculoides	A0A0L8HmK0_A0A0L8HmK0_OCTBM	Ocbimv22006262m	Gene3D	G3DSA:1.20.1070.10	NA	15	356	2.6e-50	NA	NA	NA
A	2	O_bimaculoides	A0A0L8HmK0_A0A0L8HmK0_OCTBM	Ocbimv22006262m	PRINTS	PR00237	Rhodopsin-like_GPCR_superfamily_signature	273	297	4.1e-17	IPR000276	G_protein-coupled_receptor,_rhodopsin-like	GO:0004930_GO:0007186_GO:0016021
A	2	O_bimaculoides	A0A0L8HmK0_A0A0L8HmK0_OCTBM	Ocbimv22006262m	PRINTS	PR00237	Rhodopsin-like_GPCR_superfamily_signature	104	126	4.1e-17	IPR000276	G_protein-coupled_receptor,_rhodopsin-like	GO:0004930_GO:0007186_GO:0016021
A	2	O_bimaculoides	A0A0L8HmK0_A0A0L8HmK0_OCTBM	Ocbimv22006262m	SUPERFAMILY	SSF81321	NA	269	354	2.38e-40	NA	NA	NA
A	2	O_bimaculoides	A0A0L8HmK0_A0A0L8HmK0_OCTBM	Ocbimv22006262m	Pfam	PF00001	7_transmembrane_receptor_(rhodopsin_family)	42	334	3.3e-29	IPR000276	G_protein-coupled_receptor,_rhodopsin-like	GO:0004930_GO:0007186_GO:0016021
A	2	O_bimaculoides	A0A0L8HmK0_A0A0L8HmK0_OCTBM	Ocbimv22006262m	PRINTS	PR00237	Rhodopsin-like_GPCR_superfamily_signature	316	342	4.1e-17	IPR000276	G_protein-coupled_receptor,_rhodopsin-like	GO:0004930_GO:0007186_GO:0016021
A	2	O_bimaculoides	A0A0L8HmK0_A0A0L8HmK0_OCTBM	Ocbimv22006262m	PRINTS	PR00237	Rhodopsin-like_GPCR_superfamily_signature	27	51	4.1e-17	IPR000276	G_protein-coupled_receptor,_rhodopsin-like	GO:0004930_GO:0007186_GO:0016021
A	2	O_bimaculoides	A0A0L8HmK0_A0A0L8HmK0_OCTBM	Ocbimv22006262m	SUPERFAMILY	SSF81321	NA	20	224	2.38e-40	NA	NA	NA
A	2	O_bimaculoides	A0A0L8HmK0_A0A0L8HmK0_OCTBM	Ocbimv22006262m	PANTHER	PTHR24241	NA	30	350	1.1e-42	NA	NA	NA
A	2	O_bimaculoides	A0A0L8HmK0_A0A0L8HmK0_OCTBM	Ocbimv22006262m	PRINTS	PR00237	Rhodopsin-like_GPCR_superfamily_signature	59	80	4.1e-17	IPR000276	G_protein-coupled_receptor,_rhodopsin-like	GO:0004930_GO:0007186_GO:0016021
A	2	O_bimaculoides	A0A0L8HmN0_A0A0L8HmN0_OCTBM	Ocbimv22006266m	PRINTS	PR00237	Rhodopsin-like_GPCR_superfamily_signature	59	80	3.6e-17	IPR000276	G_protein-coupled_receptor,_rhodopsin-like	GO:0004930_GO:0007186_GO:0016021
A	2	O_bimaculoides	A0A0L8HmN0_A0A0L8HmN0_OCTBM	Ocbimv22006266m	PRINTS	PR00237	Rhodopsin-like_GPCR_superfamily_signature	104	126	3.6e-17	IPR000276	G_protein-coupled_receptor,_rhodopsin-like	GO:0004930_GO:0007186_GO:0016021
A	2	O_bimaculoides	A0A0L8HmN0_A0A0L8HmN0_OCTBM	Ocbimv22006266m	SUPERFAMILY	SSF81321	NA	21	224	1.1e-36	NA	NA	NA
A	2	O_bimaculoides	A0A0L8HmN0_A0A0L8HmN0_OCTBM	Ocbimv22006266m	PANTHER	PTHR24241	NA	23	348	2.4e-37	NA	NA	NA
A	2	O_bimaculoides	A0A0L8HmN0_A0A0L8HmN0_OCTBM	Ocbimv22006266m	SUPERFAMILY	SSF81321	NA	262	350	1.1e-36	NA	NA	NA
A	2	O_bimaculoides	A0A0L8HmN0_A0A0L8HmN0_OCTBM	Ocbimv22006266m	PRINTS	PR00237	Rhodopsin-like_GPCR_superfamily_signature	314	340	3.6e-17	IPR000276	G_protein-coupled_receptor,_rhodopsin-like	GO:0004930_GO:0007186_GO:0016021
A	2	O_bimaculoides	A0A0L8HmN0_A0A0L8HmN0_OCTBM	Ocbimv22006266m	Pfam	PF00001	7_transmembrane_receptor_(rhodopsin_family)	42	332	2.4e-25	IPR000276	G_protein-coupled_receptor,_rhodopsin-like	GO:0004930_GO:0007186_GO:0016021
A	2	O_bimaculoides	A0A0L8HmN0_A0A0L8HmN0_OCTBM	Ocbimv22006266m	PRINTS	PR00237	Rhodopsin-like_GPCR_superfamily_signature	193	216	3.6e-17	IPR000276	G_protein-coupled_receptor,_rhodopsin-like	GO:0004930_GO:0007186_GO:0016021
A	2	O_bimaculoides	A0A0L8HmN0_A0A0L8HmN0_OCTBM	Ocbimv22006266m	PANTHER	PTHR24241:SF76	NA	23	348	2.4e-37	NA	NA	NA
A	2	O_bimaculoides	A0A0L8HmN0_A0A0L8HmN0_OCTBM	Ocbimv22006266m	Gene3D	G3DSA:1.20.1070.10	NA	11	352	4e-44	NA	NA	NA
A	2	O_bimaculoides	A0A0L8HmN0_A0A0L8HmN0_OCTBM	Ocbimv22006266m	CDD	cd00637	7tm_classA_rhodopsin-like	28	336	1.82e-17	NA	NA	NA
A	2	O_bimaculoides	A0A0L8HmN0_A0A0L8HmN0_OCTBM	Ocbimv22006266m	PRINTS	PR00237	Rhodopsin-like_GPCR_superfamily_signature	27	51	3.6e-17	IPR000276	G_protein-coupled_receptor,_rhodopsin-like	GO:0004930_GO:0007186_GO:0016021
A	2	O_bimaculoides	A0A0L8HmP1_A0A0L8HmP1_OCTBM	Ocbimv22006267m	PRINTS	PR00237	Rhodopsin-like_GPCR_superfamily_signature	59	80	1.1e-16	IPR000276	G_protein-coupled_receptor,_rhodopsin-like	GO:0004930_GO:0007186_GO:0016021
A	2	O_bimaculoides	A0A0L8HmP1_A0A0L8HmP1_OCTBM	Ocbimv22006267m	PRINTS	PR00237	Rhodopsin-like_GPCR_superfamily_signature	104	126	1.1e-16	IPR000276	G_protein-coupled_receptor,_rhodopsin-like	GO:0004930_GO:0007186_GO:0016021
A	2	O_bimaculoides	A0A0L8HmP1_A0A0L8HmP1_OCTBM	Ocbimv22006267m	CDD	cd00637	7tm_classA_rhodopsin-like	32	340	5.01e-21	NA	NA	NA
A	2	O_bimaculoides	A0A0L8HmP1_A0A0L8HmP1_OCTBM	Ocbimv22006267m	PRINTS	PR00237	Rhodopsin-like_GPCR_superfamily_signature	318	344	1.1e-16	IPR000276	G_protein-coupled_receptor,_rhodopsin-like	GO:0004930_GO:0007186_GO:0016021
A	2	O_bimaculoides	A0A0L8HmP1_A0A0L8HmP1_OCTBM	Ocbimv22006267m	Gene3D	G3DSA:1.20.1070.10	NA	11	359	2.9e-47	NA	NA	NA
A	2	O_bimaculoides	A0A0L8HmP1_A0A0L8HmP1_OCTBM	Ocbimv22006267m	SUPERFAMILY	SSF81321	NA	22	234	2.84e-37	NA	NA	NA
A	2	O_bimaculoides	A0A0L8HmP1_A0A0L8HmP1_OCTBM	Ocbimv22006267m	PRINTS	PR00237	Rhodopsin-like_GPCR_superfamily_signature	27	51	1.1e-16	IPR000276	G_protein-coupled_receptor,_rhodopsin-like	GO:0004930_GO:0007186_GO:0016021
A	2	O_bimaculoides	A0A0L8HmP1_A0A0L8HmP1_OCTBM	Ocbimv22006267m	PANTHER	PTHR24241	NA	28	352	9.3e-39	NA	NA	NA
A	2	O_bimaculoides	A0A0L8HmP1_A0A0L8HmP1_OCTBM	Ocbimv22006267m	SUPERFAMILY	SSF81321	NA	271	358	2.84e-37	NA	NA	NA
A	2	O_bimaculoides	A0A0L8HmP1_A0A0L8HmP1_OCTBM	Ocbimv22006267m	PRINTS	PR00237	Rhodopsin-like_GPCR_superfamily_signature	275	299	1.1e-16	IPR000276	G_protein-coupled_receptor,_rhodopsin-like	GO:0004930_GO:0007186_GO:0016021
A	2	O_bimaculoides	A0A0L8HmP1_A0A0L8HmP1_OCTBM	Ocbimv22006267m	Pfam	PF00001	7_transmembrane_receptor_(rhodopsin_family)	42	336	1.2e-24	IPR000276	G_protein-coupled_receptor,_rhodopsin-like	GO:0004930_GO:0007186_GO:0016021
A	1	O_bimaculoides	A0A0L8HPF2_A0A0L8HPF2_OCTBM	Ocbimv22009806m	PRINTS	PR00237	Rhodopsin-like_GPCR_superfamily_signature	64	85	1.1e-21	IPR000276	G_protein-coupled_receptor,_rhodopsin-like	GO:0004930_GO:0007186_GO:0016021
A	1	O_bimaculoides	A0A0L8HPF2_A0A0L8HPF2_OCTBM	Ocbimv22009806m	CDD	cd00637	7tm_classA_rhodopsin-like	34	310	6.03e-32	NA	NA	NA
A	1	O_bimaculoides	A0A0L8HPF2_A0A0L8HPF2_OCTBM	Ocbimv22009806m	Gene3D	G3DSA:1.20.1070.10	NA	20	330	1.9e-48	NA	NA	NA
A	1	O_bimaculoides	A0A0L8HPF2_A0A0L8HPF2_OCTBM	Ocbimv22009806m	PRINTS	PR00237	Rhodopsin-like_GPCR_superfamily_signature	32	56	1.1e-21	IPR000276	G_protein-coupled_receptor,_rhodopsin-like	GO:0004930_GO:0007186_GO:0016021
A	1	O_bimaculoides	A0A0L8HPF2_A0A0L8HPF2_OCTBM	Ocbimv22009806m	SUPERFAMILY	SSF81321	NA	31	336	6.59e-45	NA	NA	NA
A	1	O_bimaculoides	A0A0L8HPF2_A0A0L8HPF2_OCTBM	Ocbimv22009806m	Pfam	PF00001	7_transmembrane_receptor_(rhodopsin_family)	47	306	1.1e-28	IPR000276	G_protein-coupled_receptor,_rhodopsin-like	GO:0004930_GO:0007186_GO:0016021
A	1	O_bimaculoides	A0A0L8HPF2_A0A0L8HPF2_OCTBM	Ocbimv22009806m	PRINTS	PR00237	Rhodopsin-like_GPCR_superfamily_signature	248	272	1.1e-21	IPR000276	G_protein-coupled_receptor,_rhodopsin-like	GO:0004930_GO:0007186_GO:0016021
A	1	O_bimaculoides	A0A0L8HPF2_A0A0L8HPF2_OCTBM	Ocbimv22009806m	PRINTS	PR00237	Rhodopsin-like_GPCR_superfamily_signature	109	131	1.1e-21	IPR000276	G_protein-coupled_receptor,_rhodopsin-like	GO:0004930_GO:0007186_GO:0016021
A	1	O_bimaculoides	A0A0L8HPF2_A0A0L8HPF2_OCTBM	Ocbimv22009806m	PRINTS	PR00237	Rhodopsin-like_GPCR_superfamily_signature	288	314	1.1e-21	IPR000276	G_protein-coupled_receptor,_rhodopsin-like	GO:0004930_GO:0007186_GO:0016021
A	1	O_bimaculoides	A0A0L8HPF2_A0A0L8HPF2_OCTBM	Ocbimv22009806m	PRINTS	PR00237	Rhodopsin-like_GPCR_superfamily_signature	193	216	1.1e-21	IPR000276	G_protein-coupled_receptor,_rhodopsin-like	GO:0004930_GO:0007186_GO:0016021
A	1	O_bimaculoides	A0A0L8HPF2_A0A0L8HPF2_OCTBM	Ocbimv22009806m	PANTHER	PTHR43893	NA	29	333	4.1e-38	NA	NA	NA
A	2	O_bimaculoides	A0A0L8FRL7_A0A0L8FRL7_OCTBM	Ocbimv22009966m	Gene3D	G3DSA:1.20.1070.10	NA	1	291	1e-42	NA	NA	NA
A	2	O_bimaculoides	A0A0L8FRL7_A0A0L8FRL7_OCTBM	Ocbimv22009966m	PRINTS	PR00237	Rhodopsin-like_GPCR_superfamily_signature	44	66	1.3e-12	IPR000276	G_protein-coupled_receptor,_rhodopsin-like	GO:0004930_GO:0007186_GO:0016021
A	2	O_bimaculoides	A0A0L8FRL7_A0A0L8FRL7_OCTBM	Ocbimv22009966m	SUPERFAMILY	SSF81321	NA	191	299	1.01e-35	NA	NA	NA
A	2	O_bimaculoides	A0A0L8FRL7_A0A0L8FRL7_OCTBM	Ocbimv22009966m	CDD	cd00637	7tm_classA_rhodopsin-like	1	280	2.64e-20	NA	NA	NA
A	2	O_bimaculoides	A0A0L8FRL7_A0A0L8FRL7_OCTBM	Ocbimv22009966m	PANTHER	PTHR24241	NA	1	292	5e-38	NA	NA	NA
A	2	O_bimaculoides	A0A0L8FRL7_A0A0L8FRL7_OCTBM	Ocbimv22009966m	SUPERFAMILY	SSF81321	NA	1	164	1.01e-35	NA	NA	NA
A	2	O_bimaculoides	A0A0L8FRL7_A0A0L8FRL7_OCTBM	Ocbimv22009966m	PRINTS	PR00237	Rhodopsin-like_GPCR_superfamily_signature	215	239	1.3e-12	IPR000276	G_protein-coupled_receptor,_rhodopsin-like	GO:0004930_GO:0007186_GO:0016021
A	2	O_bimaculoides	A0A0L8FRL7_A0A0L8FRL7_OCTBM	Ocbimv22009966m	PRINTS	PR00237	Rhodopsin-like_GPCR_superfamily_signature	78	99	1.3e-12	IPR000276	G_protein-coupled_receptor,_rhodopsin-like	GO:0004930_GO:0007186_GO:0016021
A	2	O_bimaculoides	A0A0L8FRL7_A0A0L8FRL7_OCTBM	Ocbimv22009966m	PRINTS	PR00237	Rhodopsin-like_GPCR_superfamily_signature	258	284	1.3e-12	IPR000276	G_protein-coupled_receptor,_rhodopsin-like	GO:0004930_GO:0007186_GO:0016021
A	2	O_bimaculoides	A0A0L8FRL7_A0A0L8FRL7_OCTBM	Ocbimv22009966m	Pfam	PF00001	7_transmembrane_receptor_(rhodopsin_family)	1	276	2.7e-24	IPR000276	G_protein-coupled_receptor,_rhodopsin-like	GO:0004930_GO:0007186_GO:0016021
A	1	O_bimaculoides	A0A0L8HMm0_A0A0L8HMm0_OCTBM	Ocbimv22011018m	SUPERFAMILY	SSF81321	NA	318	407	1.1e-47	NA	NA	NA
A	1	O_bimaculoides	A0A0L8HMm0_A0A0L8HMm0_OCTBM	Ocbimv22011018m	PANTHER	PTHR24243	NA	35	408	6.4e-40	NA	NA	NA
A	1	O_bimaculoides	A0A0L8HMm0_A0A0L8HMm0_OCTBM	Ocbimv22011018m	CDD	cd00637	7tm_classA_rhodopsin-like	36	393	1.14e-29	NA	NA	NA
A	1	O_bimaculoides	A0A0L8HMm0_A0A0L8HMm0_OCTBM	Ocbimv22011018m	PRINTS	PR00237	Rhodopsin-like_GPCR_superfamily_signature	201	224	3.7e-17	IPR000276	G_protein-coupled_receptor,_rhodopsin-like	GO:0004930_GO:0007186_GO:0016021
A	1	O_bimaculoides	A0A0L8HMm0_A0A0L8HMm0_OCTBM	Ocbimv22011018m	PRINTS	PR00237	Rhodopsin-like_GPCR_superfamily_signature	112	134	3.7e-17	IPR000276	G_protein-coupled_receptor,_rhodopsin-like	GO:0004930_GO:0007186_GO:0016021
A	1	O_bimaculoides	A0A0L8HMm0_A0A0L8HMm0_OCTBM	Ocbimv22011018m	SUPERFAMILY	SSF81321	NA	5	238	1.1e-47	NA	NA	NA
A	1	O_bimaculoides	A0A0L8HMm0_A0A0L8HMm0_OCTBM	Ocbimv22011018m	PRINTS	PR00237	Rhodopsin-like_GPCR_superfamily_signature	35	59	3.7e-17	IPR000276	G_protein-coupled_receptor,_rhodopsin-like	GO:0004930_GO:0007186_GO:0016021
A	1	O_bimaculoides	A0A0L8HMm0_A0A0L8HMm0_OCTBM	Ocbimv22011018m	Pfam	PF00001	7_transmembrane_receptor_(rhodopsin_family)	50	389	5.9e-33	IPR000276	G_protein-coupled_receptor,_rhodopsin-like	GO:0004930_GO:0007186_GO:0016021
A	1	O_bimaculoides	A0A0L8HMm0_A0A0L8HMm0_OCTBM	Ocbimv22011018m	PRINTS	PR00237	Rhodopsin-like_GPCR_superfamily_signature	371	397	3.7e-17	IPR000276	G_protein-coupled_receptor,_rhodopsin-like	GO:0004930_GO:0007186_GO:0016021
A	1	O_bimaculoides	A0A0L8HMm0_A0A0L8HMm0_OCTBM	Ocbimv22011018m	PRINTS	PR00237	Rhodopsin-like_GPCR_superfamily_signature	329	353	3.7e-17	IPR000276	G_protein-coupled_receptor,_rhodopsin-like	GO:0004930_GO:0007186_GO:0016021
A	1	O_bimaculoides	A0A0L8HMm0_A0A0L8HMm0_OCTBM	Ocbimv22011018m	PRINTS	PR00237	Rhodopsin-like_GPCR_superfamily_signature	67	88	3.7e-17	IPR000276	G_protein-coupled_receptor,_rhodopsin-like	GO:0004930_GO:0007186_GO:0016021
A	1	O_bimaculoides	A0A0L8HMV5_A0A0L8HMV5_OCTBM	Ocbimv22011019m	PRINTS	PR00237	Rhodopsin-like_GPCR_superfamily_signature	30	54	4.4e-14	IPR000276	G_protein-coupled_receptor,_rhodopsin-like	GO:0004930_GO:0007186_GO:0016021
A	1	O_bimaculoides	A0A0L8HMV5_A0A0L8HMV5_OCTBM	Ocbimv22011019m	Pfam	PF00001	7_transmembrane_receptor_(rhodopsin_family)	45	383	1.9e-29	IPR000276	G_protein-coupled_receptor,_rhodopsin-like	GO:0004930_GO:0007186_GO:0016021
A	1	O_bimaculoides	A0A0L8HMV5_A0A0L8HMV5_OCTBM	Ocbimv22011019m	PRINTS	PR00237	Rhodopsin-like_GPCR_superfamily_signature	365	391	4.4e-14	IPR000276	G_protein-coupled_receptor,_rhodopsin-like	GO:0004930_GO:0007186_GO:0016021
A	1	O_bimaculoides	A0A0L8HMV5_A0A0L8HMV5_OCTBM	Ocbimv22011019m	SUPERFAMILY	SSF81321	NA	313	401	1.37e-45	NA	NA	NA
A	1	O_bimaculoides	A0A0L8HMV5_A0A0L8HMV5_OCTBM	Ocbimv22011019m	PRINTS	PR00237	Rhodopsin-like_GPCR_superfamily_signature	62	83	4.4e-14	IPR000276	G_protein-coupled_receptor,_rhodopsin-like	GO:0004930_GO:0007186_GO:0016021
A	1	O_bimaculoides	A0A0L8HMV5_A0A0L8HMV5_OCTBM	Ocbimv22011019m	PRINTS	PR00237	Rhodopsin-like_GPCR_superfamily_signature	324	348	4.4e-14	IPR000276	G_protein-coupled_receptor,_rhodopsin-like	GO:0004930_GO:0007186_GO:0016021
A	1	O_bimaculoides	A0A0L8HMV5_A0A0L8HMV5_OCTBM	Ocbimv22011019m	PANTHER	PTHR24241	NA	24	398	1.8e-37	NA	NA	NA
A	1	O_bimaculoides	A0A0L8HMV5_A0A0L8HMV5_OCTBM	Ocbimv22011019m	PRINTS	PR00237	Rhodopsin-like_GPCR_superfamily_signature	107	129	4.4e-14	IPR000276	G_protein-coupled_receptor,_rhodopsin-like	GO:0004930_GO:0007186_GO:0016021
A	1	O_bimaculoides	A0A0L8HMV5_A0A0L8HMV5_OCTBM	Ocbimv22011019m	CDD	cd00637	7tm_classA_rhodopsin-like	31	387	9.39e-22	NA	NA	NA
A	1	O_bimaculoides	A0A0L8HMV5_A0A0L8HMV5_OCTBM	Ocbimv22011019m	SUPERFAMILY	SSF81321	NA	12	228	1.37e-45	NA	NA	NA
A	1	O_bimaculoides	A0A0L8HM63_A0A0L8HM63_OCTBM	Ocbimv22011399m	Pfam	PF00001	7_transmembrane_receptor_(rhodopsin_family)	2	245	4.8e-16	IPR000276	G_protein-coupled_receptor,_rhodopsin-like	GO:0004930_GO:0007186_GO:0016021
A	1	O_bimaculoides	A0A0L8HM63_A0A0L8HM63_OCTBM	Ocbimv22011399m	CDD	cd00637	7tm_classA_rhodopsin-like	1	251	1.06e-16	NA	NA	NA
A	1	O_bimaculoides	A0A0L8HM63_A0A0L8HM63_OCTBM	Ocbimv22011399m	PANTHER	PTHR24241	NA	2	262	1.4e-25	NA	NA	NA
A	1	O_bimaculoides	A0A0L8HM63_A0A0L8HM63_OCTBM	Ocbimv22011399m	SUPERFAMILY	SSF81321	NA	3	266	3.94e-30	NA	NA	NA
A	1	O_bimaculoides	A0A0L8HM63_A0A0L8HM63_OCTBM	Ocbimv22011399m	Gene3D	G3DSA:1.20.1070.10	NA	1	267	3.8e-37	NA	NA	NA
A	1	O_bimaculoides	A0A0L8HMG6_A0A0L8HMG6_OCTBM	Ocbimv22011400m	SUPERFAMILY	SSF81321	NA	11	298	1.1e-38	NA	NA	NA
A	1	O_bimaculoides	A0A0L8HMG6_A0A0L8HMG6_OCTBM	Ocbimv22011400m	PRINTS	PR00237	Rhodopsin-like_GPCR_superfamily_signature	261	287	1.2e-12	IPR000276	G_protein-coupled_receptor,_rhodopsin-like	GO:0004930_GO:0007186_GO:0016021
A	1	O_bimaculoides	A0A0L8HMG6_A0A0L8HMG6_OCTBM	Ocbimv22011400m	PRINTS	PR00237	Rhodopsin-like_GPCR_superfamily_signature	48	69	1.2e-12	IPR000276	G_protein-coupled_receptor,_rhodopsin-like	GO:0004930_GO:0007186_GO:0016021
A	1	O_bimaculoides	A0A0L8HMG6_A0A0L8HMG6_OCTBM	Ocbimv22011400m	Pfam	PF00001	7_transmembrane_receptor_(rhodopsin_family)	31	279	3.6e-25	IPR000276	G_protein-coupled_receptor,_rhodopsin-like	GO:0004930_GO:0007186_GO:0016021
A	1	O_bimaculoides	A0A0L8HMG6_A0A0L8HMG6_OCTBM	Ocbimv22011400m	PANTHER	PTHR43916	NA	13	299	4.3e-35	NA	NA	NA
A	1	O_bimaculoides	A0A0L8HMG6_A0A0L8HMG6_OCTBM	Ocbimv22011400m	PRINTS	PR00237	Rhodopsin-like_GPCR_superfamily_signature	91	113	1.2e-12	IPR000276	G_protein-coupled_receptor,_rhodopsin-like	GO:0004930_GO:0007186_GO:0016021
A	1	O_bimaculoides	A0A0L8HMG6_A0A0L8HMG6_OCTBM	Ocbimv22011400m	Gene3D	G3DSA:1.20.1070.10	NA	2	299	1.4e-48	NA	NA	NA
A	1	O_bimaculoides	A0A0L8HMG6_A0A0L8HMG6_OCTBM	Ocbimv22011400m	PRINTS	PR00237	Rhodopsin-like_GPCR_superfamily_signature	16	40	1.2e-12	IPR000276	G_protein-coupled_receptor,_rhodopsin-like	GO:0004930_GO:0007186_GO:0016021
A	1	O_bimaculoides	A0A0L8HMG6_A0A0L8HMG6_OCTBM	Ocbimv22011400m	CDD	cd00637	7tm_classA_rhodopsin-like	14	283	1.15e-24	NA	NA	NA
A	1	O_bimaculoides	A0A0L8HNL1_A0A0L8HNL1_OCTBM	Ocbimv22011401m	PANTHER	PTHR44112	NA	13	267	1.3e-29	NA	NA	NA
A	1	O_bimaculoides	A0A0L8HNL1_A0A0L8HNL1_OCTBM	Ocbimv22011401m	CDD	cd00637	7tm_classA_rhodopsin-like	19	250	4.57e-23	NA	NA	NA
A	1	O_bimaculoides	A0A0L8HNL1_A0A0L8HNL1_OCTBM	Ocbimv22011401m	PRINTS	PR00237	Rhodopsin-like_GPCR_superfamily_signature	228	254	8.8e-10	IPR000276	G_protein-coupled_receptor,_rhodopsin-like	GO:0004930_GO:0007186_GO:0016021
A	1	O_bimaculoides	A0A0L8HNL1_A0A0L8HNL1_OCTBM	Ocbimv22011401m	SUPERFAMILY	SSF81321	NA	3	267	9.15e-35	NA	NA	NA
A	1	O_bimaculoides	A0A0L8HNL1_A0A0L8HNL1_OCTBM	Ocbimv22011401m	PRINTS	PR00237	Rhodopsin-like_GPCR_superfamily_signature	59	81	8.8e-10	IPR000276	G_protein-coupled_receptor,_rhodopsin-like	GO:0004930_GO:0007186_GO:0016021
A	1	O_bimaculoides	A0A0L8HNL1_A0A0L8HNL1_OCTBM	Ocbimv22011401m	Gene3D	G3DSA:1.20.1070.10	NA	1	269	9.9e-42	NA	NA	NA
A	1	O_bimaculoides	A0A0L8HNL1_A0A0L8HNL1_OCTBM	Ocbimv22011401m	PRINTS	PR00237	Rhodopsin-like_GPCR_superfamily_signature	190	214	8.8e-10	IPR000276	G_protein-coupled_receptor,_rhodopsin-like	GO:0004930_GO:0007186_GO:0016021
A	1	O_bimaculoides	A0A0L8HNL1_A0A0L8HNL1_OCTBM	Ocbimv22011401m	PRINTS	PR00237	Rhodopsin-like_GPCR_superfamily_signature	16	37	8.8e-10	IPR000276	G_protein-coupled_receptor,_rhodopsin-like	GO:0004930_GO:0007186_GO:0016021
A	1	O_bimaculoides	A0A0L8HNL1_A0A0L8HNL1_OCTBM	Ocbimv22011401m	Pfam	PF00001	7_transmembrane_receptor_(rhodopsin_family)	12	246	1.2e-25	IPR000276	G_protein-coupled_receptor,_rhodopsin-like	GO:0004930_GO:0007186_GO:0016021
A	1	O_bimaculoides	A0A0L8HM69_A0A0L8HM69_OCTBM	Ocbimv22011402m	CDD	cd00637	7tm_classA_rhodopsin-like	14	308	2.39e-23	NA	NA	NA
A	1	O_bimaculoides	A0A0L8HM69_A0A0L8HM69_OCTBM	Ocbimv22011402m	PANTHER	PTHR24228	NA	16	322	1.5e-32	NA	NA	NA
A	1	O_bimaculoides	A0A0L8HM69_A0A0L8HM69_OCTBM	Ocbimv22011402m	PRINTS	PR00237	Rhodopsin-like_GPCR_superfamily_signature	91	113	8.8e-16	IPR000276	G_protein-coupled_receptor,_rhodopsin-like	GO:0004930_GO:0007186_GO:0016021
A	1	O_bimaculoides	A0A0L8HM69_A0A0L8HM69_OCTBM	Ocbimv22011402m	SUPERFAMILY	SSF81321	NA	12	216	1.1e-38	NA	NA	NA
A	1	O_bimaculoides	A0A0L8HM69_A0A0L8HM69_OCTBM	Ocbimv22011402m	PRINTS	PR00237	Rhodopsin-like_GPCR_superfamily_signature	16	40	8.8e-16	IPR000276	G_protein-coupled_receptor,_rhodopsin-like	GO:0004930_GO:0007186_GO:0016021
A	1	O_bimaculoides	A0A0L8HM69_A0A0L8HM69_OCTBM	Ocbimv22011402m	PRINTS	PR00237	Rhodopsin-like_GPCR_superfamily_signature	48	69	8.8e-16	IPR000276	G_protein-coupled_receptor,_rhodopsin-like	GO:0004930_GO:0007186_GO:0016021
A	1	O_bimaculoides	A0A0L8HM69_A0A0L8HM69_OCTBM	Ocbimv22011402m	Pfam	PF00001	7_transmembrane_receptor_(rhodopsin_family)	31	306	1.3e-26	IPR000276	G_protein-coupled_receptor,_rhodopsin-like	GO:0004930_GO:0007186_GO:0016021
A	1	O_bimaculoides	A0A0L8HM69_A0A0L8HM69_OCTBM	Ocbimv22011402m	PRINTS	PR00237	Rhodopsin-like_GPCR_superfamily_signature	250	274	8.8e-16	IPR000276	G_protein-coupled_receptor,_rhodopsin-like	GO:0004930_GO:0007186_GO:0016021
A	1	O_bimaculoides	A0A0L8HM69_A0A0L8HM69_OCTBM	Ocbimv22011402m	Gene3D	G3DSA:1.20.1070.10	NA	4	324	3e-51	NA	NA	NA
A	1	O_bimaculoides	A0A0L8HM69_A0A0L8HM69_OCTBM	Ocbimv22011402m	SUPERFAMILY	SSF81321	NA	246	323	1.1e-38	NA	NA	NA
A	1	O_bimaculoides	A0A0L8HM69_A0A0L8HM69_OCTBM	Ocbimv22011402m	PRINTS	PR00237	Rhodopsin-like_GPCR_superfamily_signature	288	314	8.8e-16	IPR000276	G_protein-coupled_receptor,_rhodopsin-like	GO:0004930_GO:0007186_GO:0016021
A	1	O_bimaculoides	A0A0L8HM91_A0A0L8HM91_OCTBM	Ocbimv22011403m	PRINTS	PR00237	Rhodopsin-like_GPCR_superfamily_signature	261	287	4.6e-15	IPR000276	G_protein-coupled_receptor,_rhodopsin-like	GO:0004930_GO:0007186_GO:0016021
A	1	O_bimaculoides	A0A0L8HM91_A0A0L8HM91_OCTBM	Ocbimv22011403m	SUPERFAMILY	SSF81321	NA	12	298	1.56e-41	NA	NA	NA
A	1	O_bimaculoides	A0A0L8HM91_A0A0L8HM91_OCTBM	Ocbimv22011403m	PANTHER	PTHR43916	NA	13	296	7.6e-36	NA	NA	NA
A	1	O_bimaculoides	A0A0L8HM91_A0A0L8HM91_OCTBM	Ocbimv22011403m	PANTHER	PTHR43916:SF13	NA	13	296	7.6e-36	NA	NA	NA
A	1	O_bimaculoides	A0A0L8HM91_A0A0L8HM91_OCTBM	Ocbimv22011403m	PRINTS	PR00237	Rhodopsin-like_GPCR_superfamily_signature	91	113	4.6e-15	IPR000276	G_protein-coupled_receptor,_rhodopsin-like	GO:0004930_GO:0007186_GO:0016021
A	1	O_bimaculoides	A0A0L8HM91_A0A0L8HM91_OCTBM	Ocbimv22011403m	Pfam	PF00001	7_transmembrane_receptor_(rhodopsin_family)	31	279	3.2e-25	IPR000276	G_protein-coupled_receptor,_rhodopsin-like	GO:0004930_GO:0007186_GO:0016021
A	1	O_bimaculoides	A0A0L8HM91_A0A0L8HM91_OCTBM	Ocbimv22011403m	Gene3D	G3DSA:1.20.1070.10	NA	4	300	7e-50	NA	NA	NA
A	1	O_bimaculoides	A0A0L8HM91_A0A0L8HM91_OCTBM	Ocbimv22011403m	PRINTS	PR00237	Rhodopsin-like_GPCR_superfamily_signature	48	69	4.6e-15	IPR000276	G_protein-coupled_receptor,_rhodopsin-like	GO:0004930_GO:0007186_GO:0016021
A	1	O_bimaculoides	A0A0L8HM91_A0A0L8HM91_OCTBM	Ocbimv22011403m	PRINTS	PR00237	Rhodopsin-like_GPCR_superfamily_signature	16	40	4.6e-15	IPR000276	G_protein-coupled_receptor,_rhodopsin-like	GO:0004930_GO:0007186_GO:0016021
A	1	O_bimaculoides	A0A0L8HM67_A0A0L8HM67_OCTBM	Ocbimv22011404m	PANTHER	PTHR43916:SF13	NA	2	264	3.2e-33	NA	NA	NA
A	1	O_bimaculoides	A0A0L8HM67_A0A0L8HM67_OCTBM	Ocbimv22011404m	Gene3D	G3DSA:1.20.1070.10	NA	1	267	5.9e-47	NA	NA	NA
A	1	O_bimaculoides	A0A0L8HM67_A0A0L8HM67_OCTBM	Ocbimv22011404m	PRINTS	PR00237	Rhodopsin-like_GPCR_superfamily_signature	16	37	2.4e-10	IPR000276	G_protein-coupled_receptor,_rhodopsin-like	GO:0004930_GO:0007186_GO:0016021
A	1	O_bimaculoides	A0A0L8HM67_A0A0L8HM67_OCTBM	Ocbimv22011404m	CDD	cd00637	7tm_classA_rhodopsin-like	3	251	5.16e-23	NA	NA	NA
A	1	O_bimaculoides	A0A0L8HM67_A0A0L8HM67_OCTBM	Ocbimv22011404m	PRINTS	PR00237	Rhodopsin-like_GPCR_superfamily_signature	59	81	2.4e-10	IPR000276	G_protein-coupled_receptor,_rhodopsin-like	GO:0004930_GO:0007186_GO:0016021
A	1	O_bimaculoides	A0A0L8HM67_A0A0L8HM67_OCTBM	Ocbimv22011404m	SUPERFAMILY	SSF81321	NA	4	265	5.58e-39	NA	NA	NA
A	1	O_bimaculoides	A0A0L8HM67_A0A0L8HM67_OCTBM	Ocbimv22011404m	Pfam	PF00001	7_transmembrane_receptor_(rhodopsin_family)	3	247	1.3e-23	IPR000276	G_protein-coupled_receptor,_rhodopsin-like	GO:0004930_GO:0007186_GO:0016021
A	1	O_bimaculoides	A0A0L8HM67_A0A0L8HM67_OCTBM	Ocbimv22011404m	PRINTS	PR00237	Rhodopsin-like_GPCR_superfamily_signature	191	215	2.4e-10	IPR000276	G_protein-coupled_receptor,_rhodopsin-like	GO:0004930_GO:0007186_GO:0016021
A	1	O_bimaculoides	A0A0L8HM67_A0A0L8HM67_OCTBM	Ocbimv22011404m	PRINTS	PR00237	Rhodopsin-like_GPCR_superfamily_signature	229	255	2.4e-10	IPR000276	G_protein-coupled_receptor,_rhodopsin-like	GO:0004930_GO:0007186_GO:0016021
A	1	O_bimaculoides	A0A0L8HM67_A0A0L8HM67_OCTBM	Ocbimv22011404m	PANTHER	PTHR43916	NA	2	264	3.2e-33	NA	NA	NA
A	1	O_bimaculoides	A0A0L8HM67_A0A0L8HM67_OCTBM	Ocbimv22011404m	PRINTS	PR00237	Rhodopsin-like_GPCR_superfamily_signature	143	166	2.4e-10	IPR000276	G_protein-coupled_receptor,_rhodopsin-like	GO:0004930_GO:0007186_GO:0016021
A	1	O_bimaculoides	A0A0L8HMH1_A0A0L8HMH1_OCTBM	Ocbimv22011405m	PRINTS	PR00237	Rhodopsin-like_GPCR_superfamily_signature	59	81	3.5e-14	IPR000276	G_protein-coupled_receptor,_rhodopsin-like	GO:0004930_GO:0007186_GO:0016021
A	1	O_bimaculoides	A0A0L8HMH1_A0A0L8HMH1_OCTBM	Ocbimv22011405m	Pfam	PF00001	7_transmembrane_receptor_(rhodopsin_family)	3	247	3.2e-25	IPR000276	G_protein-coupled_receptor,_rhodopsin-like	GO:0004930_GO:0007186_GO:0016021
A	1	O_bimaculoides	A0A0L8HMH1_A0A0L8HMH1_OCTBM	Ocbimv22011405m	PANTHER	PTHR24241	NA	2	262	1.8e-33	NA	NA	NA
A	1	O_bimaculoides	A0A0L8HMH1_A0A0L8HMH1_OCTBM	Ocbimv22011405m	Gene3D	G3DSA:1.20.1070.10	NA	1	267	1.1e-47	NA	NA	NA
A	1	O_bimaculoides	A0A0L8HMH1_A0A0L8HMH1_OCTBM	Ocbimv22011405m	PRINTS	PR00237	Rhodopsin-like_GPCR_superfamily_signature	191	215	3.5e-14	IPR000276	G_protein-coupled_receptor,_rhodopsin-like	GO:0004930_GO:0007186_GO:0016021
A	1	O_bimaculoides	A0A0L8HMH1_A0A0L8HMH1_OCTBM	Ocbimv22011405m	PRINTS	PR00237	Rhodopsin-like_GPCR_superfamily_signature	229	255	3.5e-14	IPR000276	G_protein-coupled_receptor,_rhodopsin-like	GO:0004930_GO:0007186_GO:0016021
A	1	O_bimaculoides	A0A0L8HMH1_A0A0L8HMH1_OCTBM	Ocbimv22011405m	SUPERFAMILY	SSF81321	NA	3	266	8.7e-41	NA	NA	NA
A	1	O_bimaculoides	A0A0L8HMH1_A0A0L8HMH1_OCTBM	Ocbimv22011405m	PRINTS	PR00237	Rhodopsin-like_GPCR_superfamily_signature	143	166	3.5e-14	IPR000276	G_protein-coupled_receptor,_rhodopsin-like	GO:0004930_GO:0007186_GO:0016021
A	1	O_bimaculoides	A0A0L8HMH1_A0A0L8HMH1_OCTBM	Ocbimv22011405m	PRINTS	PR00237	Rhodopsin-like_GPCR_superfamily_signature	16	37	3.5e-14	IPR000276	G_protein-coupled_receptor,_rhodopsin-like	GO:0004930_GO:0007186_GO:0016021
A	1	O_bimaculoides	A0A0L8HMH1_A0A0L8HMH1_OCTBM	Ocbimv22011405m	CDD	cd00637	7tm_classA_rhodopsin-like	3	251	1.17e-24	NA	NA	NA
A	1	O_bimaculoides	A0A0L8HL06_A0A0L8HL06_OCTBM	Ocbimv22012294m	PRINTS	PR00237	Rhodopsin-like_GPCR_superfamily_signature	229	255	3.8e-13	IPR000276	G_protein-coupled_receptor,_rhodopsin-like	GO:0004930_GO:0007186_GO:0016021
A	1	O_bimaculoides	A0A0L8HL06_A0A0L8HL06_OCTBM	Ocbimv22012294m	CDD	cd00637	7tm_classA_rhodopsin-like	3	251	9.15e-26	NA	NA	NA
A	1	O_bimaculoides	A0A0L8HL06_A0A0L8HL06_OCTBM	Ocbimv22012294m	Gene3D	G3DSA:1.20.1070.10	NA	1	267	6.2e-49	NA	NA	NA
A	1	O_bimaculoides	A0A0L8HL06_A0A0L8HL06_OCTBM	Ocbimv22012294m	PRINTS	PR00237	Rhodopsin-like_GPCR_superfamily_signature	16	37	3.8e-13	IPR000276	G_protein-coupled_receptor,_rhodopsin-like	GO:0004930_GO:0007186_GO:0016021
A	1	O_bimaculoides	A0A0L8HL06_A0A0L8HL06_OCTBM	Ocbimv22012294m	PRINTS	PR00237	Rhodopsin-like_GPCR_superfamily_signature	59	81	3.8e-13	IPR000276	G_protein-coupled_receptor,_rhodopsin-like	GO:0004930_GO:0007186_GO:0016021
A	1	O_bimaculoides	A0A0L8HL06_A0A0L8HL06_OCTBM	Ocbimv22012294m	SUPERFAMILY	SSF81321	NA	3	267	6.23e-41	NA	NA	NA
A	1	O_bimaculoides	A0A0L8HL06_A0A0L8HL06_OCTBM	Ocbimv22012294m	PRINTS	PR00237	Rhodopsin-like_GPCR_superfamily_signature	191	215	3.8e-13	IPR000276	G_protein-coupled_receptor,_rhodopsin-like	GO:0004930_GO:0007186_GO:0016021
A	1	O_bimaculoides	A0A0L8HL06_A0A0L8HL06_OCTBM	Ocbimv22012294m	PRINTS	PR00237	Rhodopsin-like_GPCR_superfamily_signature	143	166	3.8e-13	IPR000276	G_protein-coupled_receptor,_rhodopsin-like	GO:0004930_GO:0007186_GO:0016021
A	1	O_bimaculoides	A0A0L8HL06_A0A0L8HL06_OCTBM	Ocbimv22012294m	PANTHER	PTHR24241	NA	2	262	7.9e-36	NA	NA	NA
A	1	O_bimaculoides	A0A0L8HL06_A0A0L8HL06_OCTBM	Ocbimv22012294m	Pfam	PF00001	7_transmembrane_receptor_(rhodopsin_family)	3	247	1e-25	IPR000276	G_protein-coupled_receptor,_rhodopsin-like	GO:0004930_GO:0007186_GO:0016021
B	3	O_bimaculoides	A0A0L8HJV3_A0A0L8HJV3_OCTBM	Ocbimv22012964m	PANTHER	PTHR12011	NA	8	261	1.9e-64	NA	NA	NA
B	3	O_bimaculoides	A0A0L8HJV3_A0A0L8HJV3_OCTBM	Ocbimv22012964m	SUPERFAMILY	SSF81321	NA	21	264	1.37e-06	NA	NA	NA
B	3	O_bimaculoides	A0A0L8HJV3_A0A0L8HJV3_OCTBM	Ocbimv22012964m	Gene3D	G3DSA:1.20.1070.10	NA	2	266	8.1e-62	NA	NA	NA
B	3	O_bimaculoides	A0A0L8HJV3_A0A0L8HJV3_OCTBM	Ocbimv22012964m	PRINTS	PR00249	Secretin-like_GPCR_superfamily_signature	83	106	6.8e-15	IPR000832	GPCR,_family_2,_secretin-like	GO:0004930_GO:0007186_GO:0016021
B	3	O_bimaculoides	A0A0L8HJV3_A0A0L8HJV3_OCTBM	Ocbimv22012964m	CDD	cd15040	7tmB2_Adhesion	13	263	3.53e-63	NA	NA	NA
B	3	O_bimaculoides	A0A0L8HJV3_A0A0L8HJV3_OCTBM	Ocbimv22012964m	PRINTS	PR00249	Secretin-like_GPCR_superfamily_signature	165	190	6.8e-15	IPR000832	GPCR,_family_2,_secretin-like	GO:0004930_GO:0007186_GO:0016021
B	3	O_bimaculoides	A0A0L8HJV3_A0A0L8HJV3_OCTBM	Ocbimv22012964m	PRINTS	PR00249	Secretin-like_GPCR_superfamily_signature	236	257	6.8e-15	IPR000832	GPCR,_family_2,_secretin-like	GO:0004930_GO:0007186_GO:0016021
B	3	O_bimaculoides	A0A0L8HJV3_A0A0L8HJV3_OCTBM	Ocbimv22012964m	PRINTS	PR00249	Secretin-like_GPCR_superfamily_signature	17	41	6.8e-15	IPR000832	GPCR,_family_2,_secretin-like	GO:0004930_GO:0007186_GO:0016021
B	3	O_bimaculoides	A0A0L8HJV3_A0A0L8HJV3_OCTBM	Ocbimv22012964m	PRINTS	PR00249	Secretin-like_GPCR_superfamily_signature	122	147	6.8e-15	IPR000832	GPCR,_family_2,_secretin-like	GO:0004930_GO:0007186_GO:0016021
B	3	O_bimaculoides	A0A0L8HJV3_A0A0L8HJV3_OCTBM	Ocbimv22012964m	Pfam	PF00002	7_transmembrane_receptor_(Secretin_family)	14	250	5.5e-34	IPR000832	GPCR,_family_2,_secretin-like	GO:0004930_GO:0007186_GO:0016021
A	1	O_bimaculoides	A0A0L8FND2_A0A0L8FND2_OCTBM	Ocbimv22013341m	PRINTS	PR00237	Rhodopsin-like_GPCR_superfamily_signature	54	75	1.9e-17	IPR000276	G_protein-coupled_receptor,_rhodopsin-like	GO:0004930_GO:0007186_GO:0016021
A	1	O_bimaculoides	A0A0L8FND2_A0A0L8FND2_OCTBM	Ocbimv22013341m	Gene3D	G3DSA:1.20.1070.10	NA	8	324	5.8e-45	NA	NA	NA
A	1	O_bimaculoides	A0A0L8FND2_A0A0L8FND2_OCTBM	Ocbimv22013341m	PRINTS	PR00237	Rhodopsin-like_GPCR_superfamily_signature	286	312	1.9e-17	IPR000276	G_protein-coupled_receptor,_rhodopsin-like	GO:0004930_GO:0007186_GO:0016021
A	1	O_bimaculoides	A0A0L8FND2_A0A0L8FND2_OCTBM	Ocbimv22013341m	PRINTS	PR00237	Rhodopsin-like_GPCR_superfamily_signature	133	154	1.9e-17	IPR000276	G_protein-coupled_receptor,_rhodopsin-like	GO:0004930_GO:0007186_GO:0016021
A	1	O_bimaculoides	A0A0L8FND2_A0A0L8FND2_OCTBM	Ocbimv22013341m	PANTHER	PTHR24243	NA	18	319	5.1e-34	NA	NA	NA
A	1	O_bimaculoides	A0A0L8FND2_A0A0L8FND2_OCTBM	Ocbimv22013341m	PANTHER	PTHR24243:SF148	NA	18	319	5.1e-34	NA	NA	NA
A	1	O_bimaculoides	A0A0L8FND2_A0A0L8FND2_OCTBM	Ocbimv22013341m	SUPERFAMILY	SSF81321	NA	18	323	2.38e-42	NA	NA	NA
A	1	O_bimaculoides	A0A0L8FND2_A0A0L8FND2_OCTBM	Ocbimv22013341m	PRINTS	PR00237	Rhodopsin-like_GPCR_superfamily_signature	245	269	1.9e-17	IPR000276	G_protein-coupled_receptor,_rhodopsin-like	GO:0004930_GO:0007186_GO:0016021
A	1	O_bimaculoides	A0A0L8FND2_A0A0L8FND2_OCTBM	Ocbimv22013341m	CDD	cd00637	7tm_classA_rhodopsin-like	25	308	1.42e-28	NA	NA	NA
A	1	O_bimaculoides	A0A0L8FND2_A0A0L8FND2_OCTBM	Ocbimv22013341m	PRINTS	PR00237	Rhodopsin-like_GPCR_superfamily_signature	22	46	1.9e-17	IPR000276	G_protein-coupled_receptor,_rhodopsin-like	GO:0004930_GO:0007186_GO:0016021
A	1	O_bimaculoides	A0A0L8FND2_A0A0L8FND2_OCTBM	Ocbimv22013341m	PRINTS	PR00237	Rhodopsin-like_GPCR_superfamily_signature	99	121	1.9e-17	IPR000276	G_protein-coupled_receptor,_rhodopsin-like	GO:0004930_GO:0007186_GO:0016021
A	1	O_bimaculoides	A0A0L8FND2_A0A0L8FND2_OCTBM	Ocbimv22013341m	Pfam	PF00001	7_transmembrane_receptor_(rhodopsin_family)	38	304	4.8e-24	IPR000276	G_protein-coupled_receptor,_rhodopsin-like	GO:0004930_GO:0007186_GO:0016021
A	1	O_bimaculoides	A0A0L8FND2_A0A0L8FND2_OCTBM	Ocbimv22013341m	PRINTS	PR00237	Rhodopsin-like_GPCR_superfamily_signature	185	208	1.9e-17	IPR000276	G_protein-coupled_receptor,_rhodopsin-like	GO:0004930_GO:0007186_GO:0016021
A	1	O_bimaculoides	A0A0L8HJ61_A0A0L8HJ61_OCTBM	Ocbimv22013365m	PRINTS	PR00237	Rhodopsin-like_GPCR_superfamily_signature	331	355	1.6e-16	IPR000276	G_protein-coupled_receptor,_rhodopsin-like	GO:0004930_GO:0007186_GO:0016021
A	1	O_bimaculoides	A0A0L8HJ61_A0A0L8HJ61_OCTBM	Ocbimv22013365m	SUPERFAMILY	SSF81321	NA	320	409	3.94e-47	NA	NA	NA
A	1	O_bimaculoides	A0A0L8HJ61_A0A0L8HJ61_OCTBM	Ocbimv22013365m	Gene3D	G3DSA:1.20.1070.10	NA	269	411	2e-16	NA	NA	NA
A	1	O_bimaculoides	A0A0L8HJ61_A0A0L8HJ61_OCTBM	Ocbimv22013365m	PRINTS	PR00237	Rhodopsin-like_GPCR_superfamily_signature	373	399	1.6e-16	IPR000276	G_protein-coupled_receptor,_rhodopsin-like	GO:0004930_GO:0007186_GO:0016021
A	1	O_bimaculoides	A0A0L8HJ61_A0A0L8HJ61_OCTBM	Ocbimv22013365m	PRINTS	PR00237	Rhodopsin-like_GPCR_superfamily_signature	112	134	1.6e-16	IPR000276	G_protein-coupled_receptor,_rhodopsin-like	GO:0004930_GO:0007186_GO:0016021
A	1	O_bimaculoides	A0A0L8HJ61_A0A0L8HJ61_OCTBM	Ocbimv22013365m	PRINTS	PR00237	Rhodopsin-like_GPCR_superfamily_signature	67	88	1.6e-16	IPR000276	G_protein-coupled_receptor,_rhodopsin-like	GO:0004930_GO:0007186_GO:0016021
A	1	O_bimaculoides	A0A0L8HJ61_A0A0L8HJ61_OCTBM	Ocbimv22013365m	SUPERFAMILY	SSF81321	NA	13	232	3.94e-47	NA	NA	NA
A	1	O_bimaculoides	A0A0L8HJ61_A0A0L8HJ61_OCTBM	Ocbimv22013365m	PRINTS	PR00237	Rhodopsin-like_GPCR_superfamily_signature	35	59	1.6e-16	IPR000276	G_protein-coupled_receptor,_rhodopsin-like	GO:0004930_GO:0007186_GO:0016021
A	1	O_bimaculoides	A0A0L8HJ61_A0A0L8HJ61_OCTBM	Ocbimv22013365m	Pfam	PF00001	7_transmembrane_receptor_(rhodopsin_family)	50	391	5.7e-32	IPR000276	G_protein-coupled_receptor,_rhodopsin-like	GO:0004930_GO:0007186_GO:0016021
A	1	O_bimaculoides	A0A0L8HJ61_A0A0L8HJ61_OCTBM	Ocbimv22013365m	Gene3D	G3DSA:1.20.1070.10	NA	19	256	4e-31	NA	NA	NA
A	1	O_bimaculoides	A0A0L8HJ61_A0A0L8HJ61_OCTBM	Ocbimv22013365m	CDD	cd00637	7tm_classA_rhodopsin-like	37	395	1.1e-25	NA	NA	NA
A	1	O_bimaculoides	A0A0L8HJ61_A0A0L8HJ61_OCTBM	Ocbimv22013365m	PANTHER	PTHR24241	NA	29	406	1.9e-38	NA	NA	NA
A	1	O_bimaculoides	A0A0L8HJ24_A0A0L8HJ24_OCTBM	Ocbimv22013367m	SUPERFAMILY	SSF81321	NA	310	403	1.01e-44	NA	NA	NA
A	1	O_bimaculoides	A0A0L8HJ24_A0A0L8HJ24_OCTBM	Ocbimv22013367m	PRINTS	PR00237	Rhodopsin-like_GPCR_superfamily_signature	111	133	1.2e-15	IPR000276	G_protein-coupled_receptor,_rhodopsin-like	GO:0004930_GO:0007186_GO:0016021
A	1	O_bimaculoides	A0A0L8HJ24_A0A0L8HJ24_OCTBM	Ocbimv22013367m	Pfam	PF00001	7_transmembrane_receptor_(rhodopsin_family)	49	384	1.2e-30	IPR000276	G_protein-coupled_receptor,_rhodopsin-like	GO:0004930_GO:0007186_GO:0016021
A	1	O_bimaculoides	A0A0L8HJ24_A0A0L8HJ24_OCTBM	Ocbimv22013367m	PRINTS	PR00237	Rhodopsin-like_GPCR_superfamily_signature	366	392	1.2e-15	IPR000276	G_protein-coupled_receptor,_rhodopsin-like	GO:0004930_GO:0007186_GO:0016021
A	1	O_bimaculoides	A0A0L8HJ24_A0A0L8HJ24_OCTBM	Ocbimv22013367m	PRINTS	PR00237	Rhodopsin-like_GPCR_superfamily_signature	66	87	1.2e-15	IPR000276	G_protein-coupled_receptor,_rhodopsin-like	GO:0004930_GO:0007186_GO:0016021
A	1	O_bimaculoides	A0A0L8HJ24_A0A0L8HJ24_OCTBM	Ocbimv22013367m	PRINTS	PR00237	Rhodopsin-like_GPCR_superfamily_signature	324	348	1.2e-15	IPR000276	G_protein-coupled_receptor,_rhodopsin-like	GO:0004930_GO:0007186_GO:0016021
A	1	O_bimaculoides	A0A0L8HJ24_A0A0L8HJ24_OCTBM	Ocbimv22013367m	PANTHER	PTHR24241	NA	28	399	5.5e-37	NA	NA	NA
A	1	O_bimaculoides	A0A0L8HJ24_A0A0L8HJ24_OCTBM	Ocbimv22013367m	CDD	cd00637	7tm_classA_rhodopsin-like	36	388	2.58e-25	NA	NA	NA
A	1	O_bimaculoides	A0A0L8HJ24_A0A0L8HJ24_OCTBM	Ocbimv22013367m	SUPERFAMILY	SSF81321	NA	13	231	1.01e-44	NA	NA	NA
A	1	O_bimaculoides	A0A0L8HJ24_A0A0L8HJ24_OCTBM	Ocbimv22013367m	PRINTS	PR00237	Rhodopsin-like_GPCR_superfamily_signature	34	58	1.2e-15	IPR000276	G_protein-coupled_receptor,_rhodopsin-like	GO:0004930_GO:0007186_GO:0016021
A	2	O_bimaculoides	A0A0L8HIJ1_A0A0L8HIJ1_OCTBM	Ocbimv22013759m	Pfam	PF00001	7_transmembrane_receptor_(rhodopsin_family)	42	330	8.5e-31	IPR000276	G_protein-coupled_receptor,_rhodopsin-like	GO:0004930_GO:0007186_GO:0016021
A	2	O_bimaculoides	A0A0L8HIJ1_A0A0L8HIJ1_OCTBM	Ocbimv22013759m	CDD	cd00637	7tm_classA_rhodopsin-like	32	333	4.37e-29	NA	NA	NA
A	2	O_bimaculoides	A0A0L8HIJ1_A0A0L8HIJ1_OCTBM	Ocbimv22013759m	PRINTS	PR00237	Rhodopsin-like_GPCR_superfamily_signature	269	293	1.6e-21	IPR000276	G_protein-coupled_receptor,_rhodopsin-like	GO:0004930_GO:0007186_GO:0016021
A	2	O_bimaculoides	A0A0L8HIJ1_A0A0L8HIJ1_OCTBM	Ocbimv22013759m	PRINTS	PR00237	Rhodopsin-like_GPCR_superfamily_signature	27	51	1.6e-21	IPR000276	G_protein-coupled_receptor,_rhodopsin-like	GO:0004930_GO:0007186_GO:0016021
A	2	O_bimaculoides	A0A0L8HIJ1_A0A0L8HIJ1_OCTBM	Ocbimv22013759m	SUPERFAMILY	SSF81321	NA	22	224	1.1e-38	NA	NA	NA
A	2	O_bimaculoides	A0A0L8HIJ1_A0A0L8HIJ1_OCTBM	Ocbimv22013759m	PRINTS	PR00237	Rhodopsin-like_GPCR_superfamily_signature	193	216	1.6e-21	IPR000276	G_protein-coupled_receptor,_rhodopsin-like	GO:0004930_GO:0007186_GO:0016021
A	2	O_bimaculoides	A0A0L8HIJ1_A0A0L8HIJ1_OCTBM	Ocbimv22013759m	PRINTS	PR00237	Rhodopsin-like_GPCR_superfamily_signature	312	338	1.6e-21	IPR000276	G_protein-coupled_receptor,_rhodopsin-like	GO:0004930_GO:0007186_GO:0016021
A	2	O_bimaculoides	A0A0L8HIJ1_A0A0L8HIJ1_OCTBM	Ocbimv22013759m	Gene3D	G3DSA:1.20.1070.10	NA	9	350	2.6e-51	NA	NA	NA
A	2	O_bimaculoides	A0A0L8HIJ1_A0A0L8HIJ1_OCTBM	Ocbimv22013759m	PRINTS	PR00237	Rhodopsin-like_GPCR_superfamily_signature	59	80	1.6e-21	IPR000276	G_protein-coupled_receptor,_rhodopsin-like	GO:0004930_GO:0007186_GO:0016021
A	2	O_bimaculoides	A0A0L8HIJ1_A0A0L8HIJ1_OCTBM	Ocbimv22013759m	PANTHER	PTHR24241	NA	30	346	8.1e-42	NA	NA	NA
A	2	O_bimaculoides	A0A0L8HIJ1_A0A0L8HIJ1_OCTBM	Ocbimv22013759m	PRINTS	PR00237	Rhodopsin-like_GPCR_superfamily_signature	104	126	1.6e-21	IPR000276	G_protein-coupled_receptor,_rhodopsin-like	GO:0004930_GO:0007186_GO:0016021
A	2	O_bimaculoides	A0A0L8HIJ1_A0A0L8HIJ1_OCTBM	Ocbimv22013759m	SUPERFAMILY	SSF81321	NA	260	346	1.1e-38	NA	NA	NA
A	2	O_bimaculoides	A0A0L8HIH6_A0A0L8HIH6_OCTBM	Ocbimv22013760m	PANTHER	PTHR24241	NA	28	343	1.6e-37	NA	NA	NA
A	2	O_bimaculoides	A0A0L8HIH6_A0A0L8HIH6_OCTBM	Ocbimv22013760m	PRINTS	PR00237	Rhodopsin-like_GPCR_superfamily_signature	27	51	2.9e-18	IPR000276	G_protein-coupled_receptor,_rhodopsin-like	GO:0004930_GO:0007186_GO:0016021
A	2	O_bimaculoides	A0A0L8HIH6_A0A0L8HIH6_OCTBM	Ocbimv22013760m	Pfam	PF00001	7_transmembrane_receptor_(rhodopsin_family)	42	327	1.8e-20	IPR000276	G_protein-coupled_receptor,_rhodopsin-like	GO:0004930_GO:0007186_GO:0016021
A	2	O_bimaculoides	A0A0L8HIH6_A0A0L8HIH6_OCTBM	Ocbimv22013760m	PRINTS	PR00237	Rhodopsin-like_GPCR_superfamily_signature	309	335	2.9e-18	IPR000276	G_protein-coupled_receptor,_rhodopsin-like	GO:0004930_GO:0007186_GO:0016021
A	2	O_bimaculoides	A0A0L8HIH6_A0A0L8HIH6_OCTBM	Ocbimv22013760m	SUPERFAMILY	SSF81321	NA	25	215	2.84e-31	NA	NA	NA
A	2	O_bimaculoides	A0A0L8HIH6_A0A0L8HIH6_OCTBM	Ocbimv22013760m	SUPERFAMILY	SSF81321	NA	257	348	2.84e-31	NA	NA	NA
A	2	O_bimaculoides	A0A0L8HIH6_A0A0L8HIH6_OCTBM	Ocbimv22013760m	PRINTS	PR00237	Rhodopsin-like_GPCR_superfamily_signature	266	290	2.9e-18	IPR000276	G_protein-coupled_receptor,_rhodopsin-like	GO:0004930_GO:0007186_GO:0016021
A	2	O_bimaculoides	A0A0L8HIH6_A0A0L8HIH6_OCTBM	Ocbimv22013760m	PRINTS	PR00237	Rhodopsin-like_GPCR_superfamily_signature	59	80	2.9e-18	IPR000276	G_protein-coupled_receptor,_rhodopsin-like	GO:0004930_GO:0007186_GO:0016021
A	2	O_bimaculoides	A0A0L8HIH6_A0A0L8HIH6_OCTBM	Ocbimv22013760m	PRINTS	PR00237	Rhodopsin-like_GPCR_superfamily_signature	95	117	2.9e-18	IPR000276	G_protein-coupled_receptor,_rhodopsin-like	GO:0004930_GO:0007186_GO:0016021
A	2	O_bimaculoides	A0A0L8HIH6_A0A0L8HIH6_OCTBM	Ocbimv22013760m	PRINTS	PR00237	Rhodopsin-like_GPCR_superfamily_signature	129	150	2.9e-18	IPR000276	G_protein-coupled_receptor,_rhodopsin-like	GO:0004930_GO:0007186_GO:0016021
B	3	O_bimaculoides	A0A0L8FLR8_A0A0L8FLR8_OCTBM	Ocbimv22014869m	SUPERFAMILY	SSF81321	NA	721	992	2.65e-06	NA	NA	NA
B	3	O_bimaculoides	A0A0L8FLR8_A0A0L8FLR8_OCTBM	Ocbimv22014869m	SMART	SM00303	NA	688	739	1.7e-06	IPR000203	GPS_motif	NA
B	3	O_bimaculoides	A0A0L8FLR8_A0A0L8FLR8_OCTBM	Ocbimv22014869m	Gene3D	G3DSA:1.20.1070.10	NA	734	1010	6.1e-47	NA	NA	NA
B	3	O_bimaculoides	A0A0L8FLR8_A0A0L8FLR8_OCTBM	Ocbimv22014869m	Pfam	PF01825	GPCR_proteolysis_site,_GPS,_motif	691	734	8.7e-12	IPR000203	GPS_motif	NA
B	3	O_bimaculoides	A0A0L8FLR8_A0A0L8FLR8_OCTBM	Ocbimv22014869m	Pfam	PF00002	7_transmembrane_receptor_(Secretin_family)	742	970	1.8e-22	IPR000832	GPCR,_family_2,_secretin-like	GO:0004930_GO:0007186_GO:0016021
B	3	O_bimaculoides	A0A0L8FLR8_A0A0L8FLR8_OCTBM	Ocbimv22014869m	CDD	cd01670	Death	1100	1178	2.17e-14	NA	NA	NA
B	3	O_bimaculoides	A0A0L8FLR8_A0A0L8FLR8_OCTBM	Ocbimv22014869m	SUPERFAMILY	SSF47986	NA	1091	1177	5.65e-14	IPR011029	Death-like_domain_superfamily	NA
B	3	O_bimaculoides	A0A0L8FLR8_A0A0L8FLR8_OCTBM	Ocbimv22014869m	Gene3D	G3DSA:1.10.533.10	NA	1077	1181	2.7e-18	NA	NA	NA
B	3	O_bimaculoides	A0A0L8FLR8_A0A0L8FLR8_OCTBM	Ocbimv22014869m	Gene3D	G3DSA:3.80.10.10	NA	1	211	3.8e-36	IPR032675	Leucine-rich_repeat_domain_superfamily	NA
B	3	O_bimaculoides	A0A0L8FLR8_A0A0L8FLR8_OCTBM	Ocbimv22014869m	SUPERFAMILY	SSF52058	NA	13	154	2.98e-32	NA	NA	NA
B	3	O_bimaculoides	A0A0L8FLR8_A0A0L8FLR8_OCTBM	Ocbimv22014869m	Pfam	PF00531	Death_domain	1102	1178	7.3e-06	IPR000488	Death_domain	GO:0005515_GO:0007165
B	3	O_bimaculoides	A0A0L8FLR8_A0A0L8FLR8_OCTBM	Ocbimv22014869m	Pfam	PF13855	Leucine_rich_repeat	19	78	8.7e-16	IPR001611	Leucine-rich_repeat	GO:0005515
B	3	O_bimaculoides	A0A0L8FKK5_A0A0L8FKK5_OCTBM	Ocbimv22016162m	PRINTS	PR00249	Secretin-like_GPCR_superfamily_signature	621	646	1.6e-12	IPR000832	GPCR,_family_2,_secretin-like	GO:0004930_GO:0007186_GO:0016021
B	3	O_bimaculoides	A0A0L8FKK5_A0A0L8FKK5_OCTBM	Ocbimv22016162m	Gene3D	G3DSA:1.20.1070.10	NA	508	792	1.4e-70	NA	NA	NA
B	3	O_bimaculoides	A0A0L8FKK5_A0A0L8FKK5_OCTBM	Ocbimv22016162m	Pfam	PF00002	7_transmembrane_receptor_(Secretin_family)	512	749	1.4e-37	IPR000832	GPCR,_family_2,_secretin-like	GO:0004930_GO:0007186_GO:0016021
B	3	O_bimaculoides	A0A0L8FKK5_A0A0L8FKK5_OCTBM	Ocbimv22016162m	Pfam	PF01825	GPCR_proteolysis_site,_GPS,_motif	455	499	1.9e-13	IPR000203	GPS_motif	NA
B	3	O_bimaculoides	A0A0L8FKK5_A0A0L8FKK5_OCTBM	Ocbimv22016162m	PRINTS	PR00249	Secretin-like_GPCR_superfamily_signature	735	756	1.6e-12	IPR000832	GPCR,_family_2,_secretin-like	GO:0004930_GO:0007186_GO:0016021
B	3	O_bimaculoides	A0A0L8FKK5_A0A0L8FKK5_OCTBM	Ocbimv22016162m	PRINTS	PR00249	Secretin-like_GPCR_superfamily_signature	516	540	1.6e-12	IPR000832	GPCR,_family_2,_secretin-like	GO:0004930_GO:0007186_GO:0016021
B	3	O_bimaculoides	A0A0L8FKK5_A0A0L8FKK5_OCTBM	Ocbimv22016162m	PANTHER	PTHR12011:SF264	NA	214	818	2.4e-104	NA	NA	NA
B	3	O_bimaculoides	A0A0L8FKK5_A0A0L8FKK5_OCTBM	Ocbimv22016162m	PANTHER	PTHR12011	NA	214	818	2.4e-104	NA	NA	NA
B	3	O_bimaculoides	A0A0L8FKK5_A0A0L8FKK5_OCTBM	Ocbimv22016162m	SMART	SM00303	NA	453	505	1.1e-11	IPR000203	GPS_motif	NA
B	3	O_bimaculoides	A0A0L8FKK5_A0A0L8FKK5_OCTBM	Ocbimv22016162m	CDD	cd15040	7tmB2_Adhesion	527	762	1.01e-86	NA	NA	NA
B	3	O_bimaculoides	A0A0L8FKK5_A0A0L8FKK5_OCTBM	Ocbimv22016162m	SUPERFAMILY	SSF81321	NA	512	790	7.51e-16	NA	NA	NA
B	3	O_bimaculoides	A0A0L8FKK5_A0A0L8FKK5_OCTBM	Ocbimv22016162m	Gene3D	G3DSA:2.60.220.50	NA	335	507	4.1e-27	NA	NA	NA
B	3	O_bimaculoides	A0A0L8FKK5_A0A0L8FKK5_OCTBM	Ocbimv22016162m	PRINTS	PR00249	Secretin-like_GPCR_superfamily_signature	582	605	1.6e-12	IPR000832	GPCR,_family_2,_secretin-like	GO:0004930_GO:0007186_GO:0016021
B	3	O_bimaculoides	A0A0L8FKK5_A0A0L8FKK5_OCTBM	Ocbimv22016162m	PRINTS	PR00249	Secretin-like_GPCR_superfamily_signature	664	689	1.6e-12	IPR000832	GPCR,_family_2,_secretin-like	GO:0004930_GO:0007186_GO:0016021
A	1	O_bimaculoides	A0A0L8HEG3_A0A0L8HEG3_OCTBM	Ocbimv22016528m	CDD	cd00637	7tm_classA_rhodopsin-like	14	283	9.01e-23	NA	NA	NA
A	1	O_bimaculoides	A0A0L8HEG3_A0A0L8HEG3_OCTBM	Ocbimv22016528m	Pfam	PF00001	7_transmembrane_receptor_(rhodopsin_family)	31	279	2.3e-20	IPR000276	G_protein-coupled_receptor,_rhodopsin-like	GO:0004930_GO:0007186_GO:0016021
A	1	O_bimaculoides	A0A0L8HEG3_A0A0L8HEG3_OCTBM	Ocbimv22016528m	PRINTS	PR00237	Rhodopsin-like_GPCR_superfamily_signature	175	198	3.7e-17	IPR000276	G_protein-coupled_receptor,_rhodopsin-like	GO:0004930_GO:0007186_GO:0016021
A	1	O_bimaculoides	A0A0L8HEG3_A0A0L8HEG3_OCTBM	Ocbimv22016528m	SUPERFAMILY	SSF81321	NA	11	299	3.84e-39	NA	NA	NA
A	1	O_bimaculoides	A0A0L8HEG3_A0A0L8HEG3_OCTBM	Ocbimv22016528m	PRINTS	PR00237	Rhodopsin-like_GPCR_superfamily_signature	91	113	3.7e-17	IPR000276	G_protein-coupled_receptor,_rhodopsin-like	GO:0004930_GO:0007186_GO:0016021
A	1	O_bimaculoides	A0A0L8HEG3_A0A0L8HEG3_OCTBM	Ocbimv22016528m	PRINTS	PR00237	Rhodopsin-like_GPCR_superfamily_signature	261	287	3.7e-17	IPR000276	G_protein-coupled_receptor,_rhodopsin-like	GO:0004930_GO:0007186_GO:0016021
A	1	O_bimaculoides	A0A0L8HEG3_A0A0L8HEG3_OCTBM	Ocbimv22016528m	PRINTS	PR00237	Rhodopsin-like_GPCR_superfamily_signature	16	40	3.7e-17	IPR000276	G_protein-coupled_receptor,_rhodopsin-like	GO:0004930_GO:0007186_GO:0016021
A	1	O_bimaculoides	A0A0L8HEG3_A0A0L8HEG3_OCTBM	Ocbimv22016528m	PRINTS	PR00237	Rhodopsin-like_GPCR_superfamily_signature	223	247	3.7e-17	IPR000276	G_protein-coupled_receptor,_rhodopsin-like	GO:0004930_GO:0007186_GO:0016021
A	1	O_bimaculoides	A0A0L8HEG3_A0A0L8HEG3_OCTBM	Ocbimv22016528m	Gene3D	G3DSA:1.20.1070.10	NA	3	299	1.3e-47	NA	NA	NA
A	1	O_bimaculoides	A0A0L8HEG3_A0A0L8HEG3_OCTBM	Ocbimv22016528m	PANTHER	PTHR43916	NA	4	298	5.5e-36	NA	NA	NA
A	1	O_bimaculoides	A0A0L8HEG3_A0A0L8HEG3_OCTBM	Ocbimv22016528m	PRINTS	PR00237	Rhodopsin-like_GPCR_superfamily_signature	48	69	3.7e-17	IPR000276	G_protein-coupled_receptor,_rhodopsin-like	GO:0004930_GO:0007186_GO:0016021
B	3	O_bimaculoides	A0A0L8HDZ7_A0A0L8HDZ7_OCTBM	Ocbimv22016967m	PANTHER	PTHR24373:SF243	NA	50	173	9.7e-110	NA	NA	NA
B	3	O_bimaculoides	A0A0L8HDZ7_A0A0L8HDZ7_OCTBM	Ocbimv22016967m	Gene3D	G3DSA:2.60.220.50	NA	749	909	1.1e-26	NA	NA	NA
B	3	O_bimaculoides	A0A0L8HDZ7_A0A0L8HDZ7_OCTBM	Ocbimv22016967m	Pfam	PF13855	Leucine_rich_repeat	257	312	8.8e-13	IPR001611	Leucine-rich_repeat	GO:0005515
B	3	O_bimaculoides	A0A0L8HDZ7_A0A0L8HDZ7_OCTBM	Ocbimv22016967m	SUPERFAMILY	SSF52058	NA	7	323	1.19e-64	NA	NA	NA
B	3	O_bimaculoides	A0A0L8HDZ7_A0A0L8HDZ7_OCTBM	Ocbimv22016967m	Gene3D	G3DSA:3.80.10.10	NA	210	533	7e-31	IPR032675	Leucine-rich_repeat_domain_superfamily	NA
B	3	O_bimaculoides	A0A0L8HDZ7_A0A0L8HDZ7_OCTBM	Ocbimv22016967m	PRINTS	PR00019	Leucine-rich_repeat_signature	183	196	6.7e-05	NA	NA	NA
B	3	O_bimaculoides	A0A0L8HDZ7_A0A0L8HDZ7_OCTBM	Ocbimv22016967m	PANTHER	PTHR24373:SF243	NA	90	220	9.7e-110	NA	NA	NA
B	3	O_bimaculoides	A0A0L8HDZ7_A0A0L8HDZ7_OCTBM	Ocbimv22016967m	PANTHER	PTHR24373	NA	90	220	9.7e-110	NA	NA	NA
B	3	O_bimaculoides	A0A0L8HDZ7_A0A0L8HDZ7_OCTBM	Ocbimv22016967m	PANTHER	PTHR24373:SF243	NA	2	100	9.7e-110	NA	NA	NA
B	3	O_bimaculoides	A0A0L8HDZ7_A0A0L8HDZ7_OCTBM	Ocbimv22016967m	PRINTS	PR00019	Leucine-rich_repeat_signature	252	265	6.7e-05	NA	NA	NA
B	3	O_bimaculoides	A0A0L8HDZ7_A0A0L8HDZ7_OCTBM	Ocbimv22016967m	Pfam	PF00002	7_transmembrane_receptor_(Secretin_family)	912	1145	1.8e-26	IPR000832	GPCR,_family_2,_secretin-like	GO:0004930_GO:0007186_GO:0016021
B	3	O_bimaculoides	A0A0L8HDZ7_A0A0L8HDZ7_OCTBM	Ocbimv22016967m	PRINTS	PR00249	Secretin-like_GPCR_superfamily_signature	977	1000	2.8e-09	IPR000832	GPCR,_family_2,_secretin-like	GO:0004930_GO:0007186_GO:0016021
B	3	O_bimaculoides	A0A0L8HDZ7_A0A0L8HDZ7_OCTBM	Ocbimv22016967m	Pfam	PF13855	Leucine_rich_repeat	86	145	5.3e-17	IPR001611	Leucine-rich_repeat	GO:0005515
B	3	O_bimaculoides	A0A0L8HDZ7_A0A0L8HDZ7_OCTBM	Ocbimv22016967m	PANTHER	PTHR24373	NA	2	100	9.7e-110	NA	NA	NA
B	3	O_bimaculoides	A0A0L8HDZ7_A0A0L8HDZ7_OCTBM	Ocbimv22016967m	Pfam	PF13855	Leucine_rich_repeat	157	216	2.9e-15	IPR001611	Leucine-rich_repeat	GO:0005515
B	3	O_bimaculoides	A0A0L8HDZ7_A0A0L8HDZ7_OCTBM	Ocbimv22016967m	Pfam	PF01825	GPCR_proteolysis_site,_GPS,_motif	862	902	1.5e-13	IPR000203	GPS_motif	NA
B	3	O_bimaculoides	A0A0L8HDZ7_A0A0L8HDZ7_OCTBM	Ocbimv22016967m	PANTHER	PTHR24373	NA	50	173	9.7e-110	NA	NA	NA
B	3	O_bimaculoides	A0A0L8HDZ7_A0A0L8HDZ7_OCTBM	Ocbimv22016967m	SMART	SM00303	NA	859	908	1.4e-12	IPR000203	GPS_motif	NA
B	3	O_bimaculoides	A0A0L8HDZ7_A0A0L8HDZ7_OCTBM	Ocbimv22016967m	Gene3D	G3DSA:4.10.1240.10	NA	539	608	1e-05	IPR036445	GPCR_family_2,_extracellular_hormone_receptor_domain_superfamily	GO:0004930_GO:0016020
B	3	O_bimaculoides	A0A0L8HDZ7_A0A0L8HDZ7_OCTBM	Ocbimv22016967m	PRINTS	PR00249	Secretin-like_GPCR_superfamily_signature	1051	1076	2.8e-09	IPR000832	GPCR,_family_2,_secretin-like	GO:0004930_GO:0007186_GO:0016021
B	3	O_bimaculoides	A0A0L8HDZ7_A0A0L8HDZ7_OCTBM	Ocbimv22016967m	PRINTS	PR00249	Secretin-like_GPCR_superfamily_signature	913	937	2.8e-09	IPR000832	GPCR,_family_2,_secretin-like	GO:0004930_GO:0007186_GO:0016021
B	3	O_bimaculoides	A0A0L8HDZ7_A0A0L8HDZ7_OCTBM	Ocbimv22016967m	PRINTS	PR00249	Secretin-like_GPCR_superfamily_signature	1131	1152	2.8e-09	IPR000832	GPCR,_family_2,_secretin-like	GO:0004930_GO:0007186_GO:0016021
B	3	O_bimaculoides	A0A0L8HDZ7_A0A0L8HDZ7_OCTBM	Ocbimv22016967m	CDD	cd15040	7tmB2_Adhesion	914	1158	1.44e-74	NA	NA	NA
B	3	O_bimaculoides	A0A0L8HDZ7_A0A0L8HDZ7_OCTBM	Ocbimv22016967m	CDD	cd00117	LU	371	447	6.08e-08	NA	NA	NA
B	3	O_bimaculoides	A0A0L8HDZ7_A0A0L8HDZ7_OCTBM	Ocbimv22016967m	Gene3D	G3DSA:3.80.10.10	NA	1	91	7.3e-22	IPR032675	Leucine-rich_repeat_domain_superfamily	NA
B	3	O_bimaculoides	A0A0L8HDZ7_A0A0L8HDZ7_OCTBM	Ocbimv22016967m	PANTHER	PTHR24373:SF243	NA	159	328	9.7e-110	NA	NA	NA
B	3	O_bimaculoides	A0A0L8HDZ7_A0A0L8HDZ7_OCTBM	Ocbimv22016967m	SUPERFAMILY	SSF81321	NA	911	1176	5.95e-07	NA	NA	NA
B	3	O_bimaculoides	A0A0L8HDZ7_A0A0L8HDZ7_OCTBM	Ocbimv22016967m	Pfam	PF13855	Leucine_rich_repeat	2	49	3.4e-08	IPR001611	Leucine-rich_repeat	GO:0005515
B	3	O_bimaculoides	A0A0L8HDZ7_A0A0L8HDZ7_OCTBM	Ocbimv22016967m	PANTHER	PTHR24373	NA	159	328	9.7e-110	NA	NA	NA
B	3	O_bimaculoides	A0A0L8HDZ7_A0A0L8HDZ7_OCTBM	Ocbimv22016967m	Gene3D	G3DSA:1.20.1070.10	NA	910	1185	9.3e-57	NA	NA	NA
B	3	O_bimaculoides	A0A0L8HDZ7_A0A0L8HDZ7_OCTBM	Ocbimv22016967m	Gene3D	G3DSA:3.80.10.10	NA	92	209	2e-33	IPR032675	Leucine-rich_repeat_domain_superfamily	NA
A	1	O_bimaculoides	A0A0L8IC78_A0A0L8IC78_OCTBM	Ocbimv22020457m	Pfam	PF00001	7_transmembrane_receptor_(rhodopsin_family)	31	279	9.7e-24	IPR000276	G_protein-coupled_receptor,_rhodopsin-like	GO:0004930_GO:0007186_GO:0016021
A	1	O_bimaculoides	A0A0L8IC78_A0A0L8IC78_OCTBM	Ocbimv22020457m	PANTHER	PTHR24228	NA	17	298	1e-35	NA	NA	NA
A	1	O_bimaculoides	A0A0L8IC78_A0A0L8IC78_OCTBM	Ocbimv22020457m	PRINTS	PR00237	Rhodopsin-like_GPCR_superfamily_signature	91	113	2.1e-15	IPR000276	G_protein-coupled_receptor,_rhodopsin-like	GO:0004930_GO:0007186_GO:0016021
A	1	O_bimaculoides	A0A0L8IC78_A0A0L8IC78_OCTBM	Ocbimv22020457m	PRINTS	PR00237	Rhodopsin-like_GPCR_superfamily_signature	175	198	2.1e-15	IPR000276	G_protein-coupled_receptor,_rhodopsin-like	GO:0004930_GO:0007186_GO:0016021
A	1	O_bimaculoides	A0A0L8IC78_A0A0L8IC78_OCTBM	Ocbimv22020457m	CDD	cd00637	7tm_classA_rhodopsin-like	14	283	5.31e-25	NA	NA	NA
A	1	O_bimaculoides	A0A0L8IC78_A0A0L8IC78_OCTBM	Ocbimv22020457m	Gene3D	G3DSA:1.20.1070.10	NA	3	299	1.8e-51	NA	NA	NA
A	1	O_bimaculoides	A0A0L8IC78_A0A0L8IC78_OCTBM	Ocbimv22020457m	PRINTS	PR00237	Rhodopsin-like_GPCR_superfamily_signature	261	287	2.1e-15	IPR000276	G_protein-coupled_receptor,_rhodopsin-like	GO:0004930_GO:0007186_GO:0016021
A	1	O_bimaculoides	A0A0L8IC78_A0A0L8IC78_OCTBM	Ocbimv22020457m	SUPERFAMILY	SSF81321	NA	10	298	2.38e-43	NA	NA	NA
A	1	O_bimaculoides	A0A0L8IC78_A0A0L8IC78_OCTBM	Ocbimv22020457m	PRINTS	PR00237	Rhodopsin-like_GPCR_superfamily_signature	48	69	2.1e-15	IPR000276	G_protein-coupled_receptor,_rhodopsin-like	GO:0004930_GO:0007186_GO:0016021
A	1	O_bimaculoides	A0A0L8IC78_A0A0L8IC78_OCTBM	Ocbimv22020457m	PRINTS	PR00237	Rhodopsin-like_GPCR_superfamily_signature	16	40	2.1e-15	IPR000276	G_protein-coupled_receptor,_rhodopsin-like	GO:0004930_GO:0007186_GO:0016021
B	3	O_bimaculoides	A0A0L8IC79_A0A0L8IC79_OCTBM	Ocbimv22020955m	Pfam	PF01825	GPCR_proteolysis_site,_GPS,_motif	6	49	2.3e-13	IPR000203	GPS_motif	NA
B	3	O_bimaculoides	A0A0L8IC79_A0A0L8IC79_OCTBM	Ocbimv22020955m	CDD	cd15040	7tmB2_Adhesion	65	313	7.26e-82	NA	NA	NA
B	3	O_bimaculoides	A0A0L8IC79_A0A0L8IC79_OCTBM	Ocbimv22020955m	SMART	SM00303	NA	3	55	1.1e-12	IPR000203	GPS_motif	NA
B	3	O_bimaculoides	A0A0L8IC79_A0A0L8IC79_OCTBM	Ocbimv22020955m	PRINTS	PR00249	Secretin-like_GPCR_superfamily_signature	286	307	3.4e-16	IPR000832	GPCR,_family_2,_secretin-like	GO:0004930_GO:0007186_GO:0016021
B	3	O_bimaculoides	A0A0L8IC79_A0A0L8IC79_OCTBM	Ocbimv22020955m	PANTHER	PTHR12011	NA	7	313	5e-89	NA	NA	NA
B	3	O_bimaculoides	A0A0L8IC79_A0A0L8IC79_OCTBM	Ocbimv22020955m	PRINTS	PR00249	Secretin-like_GPCR_superfamily_signature	67	91	3.4e-16	IPR000832	GPCR,_family_2,_secretin-like	GO:0004930_GO:0007186_GO:0016021
B	3	O_bimaculoides	A0A0L8IC79_A0A0L8IC79_OCTBM	Ocbimv22020955m	PRINTS	PR00249	Secretin-like_GPCR_superfamily_signature	133	156	3.4e-16	IPR000832	GPCR,_family_2,_secretin-like	GO:0004930_GO:0007186_GO:0016021
B	3	O_bimaculoides	A0A0L8IC79_A0A0L8IC79_OCTBM	Ocbimv22020955m	PRINTS	PR00249	Secretin-like_GPCR_superfamily_signature	172	197	3.4e-16	IPR000832	GPCR,_family_2,_secretin-like	GO:0004930_GO:0007186_GO:0016021
B	3	O_bimaculoides	A0A0L8IC79_A0A0L8IC79_OCTBM	Ocbimv22020955m	PRINTS	PR00249	Secretin-like_GPCR_superfamily_signature	215	240	3.4e-16	IPR000832	GPCR,_family_2,_secretin-like	GO:0004930_GO:0007186_GO:0016021
B	3	O_bimaculoides	A0A0L8IC79_A0A0L8IC79_OCTBM	Ocbimv22020955m	Pfam	PF00002	7_transmembrane_receptor_(Secretin_family)	64	300	3.5e-37	IPR000832	GPCR,_family_2,_secretin-like	GO:0004930_GO:0007186_GO:0016021
B	3	O_bimaculoides	A0A0L8IC79_A0A0L8IC79_OCTBM	Ocbimv22020955m	Gene3D	G3DSA:2.60.220.50	NA	1	43	1e-07	NA	NA	NA
B	3	O_bimaculoides	A0A0L8IC79_A0A0L8IC79_OCTBM	Ocbimv22020955m	Gene3D	G3DSA:1.20.1070.10	NA	50	341	8.5e-72	NA	NA	NA
B	3	O_bimaculoides	A0A0L8IC79_A0A0L8IC79_OCTBM	Ocbimv22020955m	SUPERFAMILY	SSF81321	NA	63	325	1.83e-06	NA	NA	NA
B	4	O_bimaculoides	A0A0L8H6C3_A0A0L8H6C3_OCTBM	Ocbimv22021288m	Gene3D	G3DSA:1.20.1070.10	NA	1	207	1.1e-35	NA	NA	NA
B	4	O_bimaculoides	A0A0L8H6C3_A0A0L8H6C3_OCTBM	Ocbimv22021288m	PANTHER	PTHR12011:SF432	NA	2	180	1.8e-38	NA	NA	NA
B	4	O_bimaculoides	A0A0L8H6C3_A0A0L8H6C3_OCTBM	Ocbimv22021288m	Pfam	PF00002	7_transmembrane_receptor_(Secretin_family)	2	167	3.6e-14	IPR000832	GPCR,_family_2,_secretin-like	GO:0004930_GO:0007186_GO:0016021
B	4	O_bimaculoides	A0A0L8H6C3_A0A0L8H6C3_OCTBM	Ocbimv22021288m	CDD	cd15039	7tmB3_Methuselah-like	1	186	6.63e-47	NA	NA	NA
B	4	O_bimaculoides	A0A0L8H6C3_A0A0L8H6C3_OCTBM	Ocbimv22021288m	PANTHER	PTHR12011	NA	2	180	1.8e-38	NA	NA	NA
B	4	O_bimaculoides	A0A0L8H6V6_A0A0L8H6V6_OCTBM	Ocbimv22021289m	PANTHER	PTHR12011	NA	44	342	3.5e-72	NA	NA	NA
B	4	O_bimaculoides	A0A0L8H6V6_A0A0L8H6V6_OCTBM	Ocbimv22021289m	PANTHER	PTHR12011:SF432	NA	355	675	3.5e-72	NA	NA	NA
B	4	O_bimaculoides	A0A0L8H6V6_A0A0L8H6V6_OCTBM	Ocbimv22021289m	PANTHER	PTHR12011	NA	355	675	3.5e-72	NA	NA	NA
B	4	O_bimaculoides	A0A0L8H6V6_A0A0L8H6V6_OCTBM	Ocbimv22021289m	Pfam	PF00002	7_transmembrane_receptor_(Secretin_family)	391	633	3.7e-29	IPR000832	GPCR,_family_2,_secretin-like	GO:0004930_GO:0007186_GO:0016021
B	4	O_bimaculoides	A0A0L8H6V6_A0A0L8H6V6_OCTBM	Ocbimv22021289m	PANTHER	PTHR12011:SF432	NA	44	342	3.5e-72	NA	NA	NA
B	4	O_bimaculoides	A0A0L8H6V6_A0A0L8H6V6_OCTBM	Ocbimv22021289m	CDD	cd15039	7tmB3_Methuselah-like	387	652	1.92e-83	NA	NA	NA
B	4	O_bimaculoides	A0A0L8H6V6_A0A0L8H6V6_OCTBM	Ocbimv22021289m	PRINTS	PR00249	Secretin-like_GPCR_superfamily_signature	547	572	9.5e-07	IPR000832	GPCR,_family_2,_secretin-like	GO:0004930_GO:0007186_GO:0016021
B	4	O_bimaculoides	A0A0L8H6V6_A0A0L8H6V6_OCTBM	Ocbimv22021289m	PRINTS	PR00249	Secretin-like_GPCR_superfamily_signature	392	416	9.5e-07	IPR000832	GPCR,_family_2,_secretin-like	GO:0004930_GO:0007186_GO:0016021
B	4	O_bimaculoides	A0A0L8H6V6_A0A0L8H6V6_OCTBM	Ocbimv22021289m	Gene3D	G3DSA:1.20.1070.10	NA	377	674	9.9e-61	NA	NA	NA
B	4	O_bimaculoides	A0A0L8H6V6_A0A0L8H6V6_OCTBM	Ocbimv22021289m	PRINTS	PR00249	Secretin-like_GPCR_superfamily_signature	455	478	9.5e-07	IPR000832	GPCR,_family_2,_secretin-like	GO:0004930_GO:0007186_GO:0016021
B	4	O_bimaculoides	A0A0L8H6V6_A0A0L8H6V6_OCTBM	Ocbimv22021289m	PRINTS	PR00249	Secretin-like_GPCR_superfamily_signature	619	640	9.5e-07	IPR000832	GPCR,_family_2,_secretin-like	GO:0004930_GO:0007186_GO:0016021
B	4	O_bimaculoides	A0A0L8H7m3_A0A0L8H7m3_OCTBM	Ocbimv22021290m	PANTHER	PTHR12011	NA	25	306	2.5e-70	NA	NA	NA
B	4	O_bimaculoides	A0A0L8H7m3_A0A0L8H7m3_OCTBM	Ocbimv22021290m	PRINTS	PR00249	Secretin-like_GPCR_superfamily_signature	524	549	8.4e-07	IPR000832	GPCR,_family_2,_secretin-like	GO:0004930_GO:0007186_GO:0016021
B	4	O_bimaculoides	A0A0L8H7m3_A0A0L8H7m3_OCTBM	Ocbimv22021290m	PANTHER	PTHR12011:SF432	NA	25	306	2.5e-70	NA	NA	NA
B	4	O_bimaculoides	A0A0L8H7m3_A0A0L8H7m3_OCTBM	Ocbimv22021290m	PANTHER	PTHR12011	NA	332	651	2.5e-70	NA	NA	NA
B	4	O_bimaculoides	A0A0L8H7m3_A0A0L8H7m3_OCTBM	Ocbimv22021290m	PRINTS	PR00249	Secretin-like_GPCR_superfamily_signature	432	455	8.4e-07	IPR000832	GPCR,_family_2,_secretin-like	GO:0004930_GO:0007186_GO:0016021
B	4	O_bimaculoides	A0A0L8H7m3_A0A0L8H7m3_OCTBM	Ocbimv22021290m	PRINTS	PR00249	Secretin-like_GPCR_superfamily_signature	369	393	8.4e-07	IPR000832	GPCR,_family_2,_secretin-like	GO:0004930_GO:0007186_GO:0016021
B	4	O_bimaculoides	A0A0L8H7m3_A0A0L8H7m3_OCTBM	Ocbimv22021290m	Gene3D	G3DSA:1.20.1070.10	NA	356	651	1.1e-60	NA	NA	NA
B	4	O_bimaculoides	A0A0L8H7m3_A0A0L8H7m3_OCTBM	Ocbimv22021290m	PRINTS	PR00249	Secretin-like_GPCR_superfamily_signature	596	617	8.4e-07	IPR000832	GPCR,_family_2,_secretin-like	GO:0004930_GO:0007186_GO:0016021
B	4	O_bimaculoides	A0A0L8H7m3_A0A0L8H7m3_OCTBM	Ocbimv22021290m	CDD	cd15039	7tmB3_Methuselah-like	364	629	5.61e-85	NA	NA	NA
B	4	O_bimaculoides	A0A0L8H7m3_A0A0L8H7m3_OCTBM	Ocbimv22021290m	PANTHER	PTHR12011:SF432	NA	332	651	2.5e-70	NA	NA	NA
B	4	O_bimaculoides	A0A0L8H7m3_A0A0L8H7m3_OCTBM	Ocbimv22021290m	Pfam	PF00002	7_transmembrane_receptor_(Secretin_family)	368	610	3.1e-29	IPR000832	GPCR,_family_2,_secretin-like	GO:0004930_GO:0007186_GO:0016021
B	4	O_bimaculoides	A0A0L8H6B0_A0A0L8H6B0_OCTBM	Ocbimv22021291m	PRINTS	PR00249	Secretin-like_GPCR_superfamily_signature	534	559	7.9e-08	IPR000832	GPCR,_family_2,_secretin-like	GO:0004930_GO:0007186_GO:0016021
B	4	O_bimaculoides	A0A0L8H6B0_A0A0L8H6B0_OCTBM	Ocbimv22021291m	PRINTS	PR00249	Secretin-like_GPCR_superfamily_signature	379	403	7.9e-08	IPR000832	GPCR,_family_2,_secretin-like	GO:0004930_GO:0007186_GO:0016021
B	4	O_bimaculoides	A0A0L8H6B0_A0A0L8H6B0_OCTBM	Ocbimv22021291m	Pfam	PF00002	7_transmembrane_receptor_(Secretin_family)	378	620	1.4e-29	IPR000832	GPCR,_family_2,_secretin-like	GO:0004930_GO:0007186_GO:0016021
B	4	O_bimaculoides	A0A0L8H6B0_A0A0L8H6B0_OCTBM	Ocbimv22021291m	PANTHER	PTHR12011	NA	345	632	9.4e-73	NA	NA	NA
B	4	O_bimaculoides	A0A0L8H6B0_A0A0L8H6B0_OCTBM	Ocbimv22021291m	PRINTS	PR00249	Secretin-like_GPCR_superfamily_signature	606	627	7.9e-08	IPR000832	GPCR,_family_2,_secretin-like	GO:0004930_GO:0007186_GO:0016021
B	4	O_bimaculoides	A0A0L8H6B0_A0A0L8H6B0_OCTBM	Ocbimv22021291m	Gene3D	G3DSA:1.20.1070.10	NA	365	649	1.5e-58	NA	NA	NA
B	4	O_bimaculoides	A0A0L8H6B0_A0A0L8H6B0_OCTBM	Ocbimv22021291m	CDD	cd15039	7tmB3_Methuselah-like	374	638	3.78e-84	NA	NA	NA
B	4	O_bimaculoides	A0A0L8H6B0_A0A0L8H6B0_OCTBM	Ocbimv22021291m	PANTHER	PTHR12011:SF432	NA	345	632	9.4e-73	NA	NA	NA
B	4	O_bimaculoides	A0A0L8H6B0_A0A0L8H6B0_OCTBM	Ocbimv22021291m	PANTHER	PTHR12011:SF432	NA	28	315	9.4e-73	NA	NA	NA
B	4	O_bimaculoides	A0A0L8H6B0_A0A0L8H6B0_OCTBM	Ocbimv22021291m	PANTHER	PTHR12011	NA	28	315	9.4e-73	NA	NA	NA
B	4	O_bimaculoides	A0A0L8H6B0_A0A0L8H6B0_OCTBM	Ocbimv22021291m	PRINTS	PR00249	Secretin-like_GPCR_superfamily_signature	442	465	7.9e-08	IPR000832	GPCR,_family_2,_secretin-like	GO:0004930_GO:0007186_GO:0016021
B	4	O_bimaculoides	A0A0L8H6J8_A0A0L8H6J8_OCTBM	Ocbimv22021292m	PRINTS	PR00249	Secretin-like_GPCR_superfamily_signature	301	325	3.1e-09	IPR000832	GPCR,_family_2,_secretin-like	GO:0004930_GO:0007186_GO:0016021
B	4	O_bimaculoides	A0A0L8H6J8_A0A0L8H6J8_OCTBM	Ocbimv22021292m	PANTHER	PTHR12011	NA	82	214	1.7e-52	NA	NA	NA
B	4	O_bimaculoides	A0A0L8H6J8_A0A0L8H6J8_OCTBM	Ocbimv22021292m	CDD	cd15039	7tmB3_Methuselah-like	300	560	2.27e-54	NA	NA	NA
B	4	O_bimaculoides	A0A0L8H6J8_A0A0L8H6J8_OCTBM	Ocbimv22021292m	PRINTS	PR00249	Secretin-like_GPCR_superfamily_signature	456	481	3.1e-09	IPR000832	GPCR,_family_2,_secretin-like	GO:0004930_GO:0007186_GO:0016021
B	4	O_bimaculoides	A0A0L8H6J8_A0A0L8H6J8_OCTBM	Ocbimv22021292m	Gene3D	G3DSA:1.20.1070.10	NA	286	571	8e-57	NA	NA	NA
B	4	O_bimaculoides	A0A0L8H6J8_A0A0L8H6J8_OCTBM	Ocbimv22021292m	PANTHER	PTHR12011:SF432	NA	257	569	1.7e-52	NA	NA	NA
B	4	O_bimaculoides	A0A0L8H6J8_A0A0L8H6J8_OCTBM	Ocbimv22021292m	SUPERFAMILY	SSF81321	NA	292	574	7.05e-06	NA	NA	NA
B	4	O_bimaculoides	A0A0L8H6J8_A0A0L8H6J8_OCTBM	Ocbimv22021292m	PANTHER	PTHR12011:SF432	NA	82	214	1.7e-52	NA	NA	NA
B	4	O_bimaculoides	A0A0L8H6J8_A0A0L8H6J8_OCTBM	Ocbimv22021292m	PANTHER	PTHR12011	NA	257	569	1.7e-52	NA	NA	NA
B	4	O_bimaculoides	A0A0L8H6J8_A0A0L8H6J8_OCTBM	Ocbimv22021292m	PRINTS	PR00249	Secretin-like_GPCR_superfamily_signature	363	386	3.1e-09	IPR000832	GPCR,_family_2,_secretin-like	GO:0004930_GO:0007186_GO:0016021
B	4	O_bimaculoides	A0A0L8H6J8_A0A0L8H6J8_OCTBM	Ocbimv22021292m	Pfam	PF00002	7_transmembrane_receptor_(Secretin_family)	298	541	2.6e-28	IPR000832	GPCR,_family_2,_secretin-like	GO:0004930_GO:0007186_GO:0016021
B	4	O_bimaculoides	A0A0L8H6J8_A0A0L8H6J8_OCTBM	Ocbimv22021292m	PRINTS	PR00249	Secretin-like_GPCR_superfamily_signature	527	548	3.1e-09	IPR000832	GPCR,_family_2,_secretin-like	GO:0004930_GO:0007186_GO:0016021
B	4	O_bimaculoides	A0A0L8H6C9_A0A0L8H6C9_OCTBM	Ocbimv22021293m	PANTHER	PTHR12011:SF432	NA	360	648	1.4e-59	NA	NA	NA
B	4	O_bimaculoides	A0A0L8H6C9_A0A0L8H6C9_OCTBM	Ocbimv22021293m	PRINTS	PR00249	Secretin-like_GPCR_superfamily_signature	367	391	8.7e-09	IPR000832	GPCR,_family_2,_secretin-like	GO:0004930_GO:0007186_GO:0016021
B	4	O_bimaculoides	A0A0L8H6C9_A0A0L8H6C9_OCTBM	Ocbimv22021293m	SUPERFAMILY	SSF81321	NA	358	644	1.74e-05	NA	NA	NA
B	4	O_bimaculoides	A0A0L8H6C9_A0A0L8H6C9_OCTBM	Ocbimv22021293m	PANTHER	PTHR12011:SF432	NA	38	350	1.4e-59	NA	NA	NA
B	4	O_bimaculoides	A0A0L8H6C9_A0A0L8H6C9_OCTBM	Ocbimv22021293m	PRINTS	PR00249	Secretin-like_GPCR_superfamily_signature	429	452	8.7e-09	IPR000832	GPCR,_family_2,_secretin-like	GO:0004930_GO:0007186_GO:0016021
B	4	O_bimaculoides	A0A0L8H6C9_A0A0L8H6C9_OCTBM	Ocbimv22021293m	PRINTS	PR00249	Secretin-like_GPCR_superfamily_signature	594	615	8.7e-09	IPR000832	GPCR,_family_2,_secretin-like	GO:0004930_GO:0007186_GO:0016021
B	4	O_bimaculoides	A0A0L8H6C9_A0A0L8H6C9_OCTBM	Ocbimv22021293m	PRINTS	PR00249	Secretin-like_GPCR_superfamily_signature	522	547	8.7e-09	IPR000832	GPCR,_family_2,_secretin-like	GO:0004930_GO:0007186_GO:0016021
B	4	O_bimaculoides	A0A0L8H6C9_A0A0L8H6C9_OCTBM	Ocbimv22021293m	Gene3D	G3DSA:1.20.1070.10	NA	351	648	1.9e-60	NA	NA	NA
B	4	O_bimaculoides	A0A0L8H6C9_A0A0L8H6C9_OCTBM	Ocbimv22021293m	Pfam	PF00002	7_transmembrane_receptor_(Secretin_family)	365	608	1.8e-27	IPR000832	GPCR,_family_2,_secretin-like	GO:0004930_GO:0007186_GO:0016021
B	4	O_bimaculoides	A0A0L8H6C9_A0A0L8H6C9_OCTBM	Ocbimv22021293m	PANTHER	PTHR12011	NA	38	350	1.4e-59	NA	NA	NA
B	4	O_bimaculoides	A0A0L8H6C9_A0A0L8H6C9_OCTBM	Ocbimv22021293m	CDD	cd15039	7tmB3_Methuselah-like	366	626	1e-75	NA	NA	NA
B	4	O_bimaculoides	A0A0L8H6C9_A0A0L8H6C9_OCTBM	Ocbimv22021293m	PANTHER	PTHR12011	NA	360	648	1.4e-59	NA	NA	NA
B	4	O_bimaculoides	A0A0L8H6W0_A0A0L8H6W0_OCTBM	Ocbimv22021294m	Pfam	PF00002	7_transmembrane_receptor_(Secretin_family)	59	277	2e-18	IPR000832	GPCR,_family_2,_secretin-like	GO:0004930_GO:0007186_GO:0016021
B	4	O_bimaculoides	A0A0L8H6W0_A0A0L8H6W0_OCTBM	Ocbimv22021294m	PANTHER	PTHR12011:SF432	NA	26	267	1.3e-38	NA	NA	NA
B	4	O_bimaculoides	A0A0L8H6W0_A0A0L8H6W0_OCTBM	Ocbimv22021294m	Gene3D	G3DSA:1.20.1070.10	NA	54	320	1.8e-38	NA	NA	NA
B	4	O_bimaculoides	A0A0L8H6W0_A0A0L8H6W0_OCTBM	Ocbimv22021294m	CDD	cd15039	7tmB3_Methuselah-like	58	313	4.69e-46	NA	NA	NA
B	4	O_bimaculoides	A0A0L8H6W0_A0A0L8H6W0_OCTBM	Ocbimv22021294m	PANTHER	PTHR12011	NA	26	267	1.3e-38	NA	NA	NA
B	4	O_bimaculoides	A0A0L8H7m8_A0A0L8H7m8_OCTBM	Ocbimv22021295m	CDD	cd15039	7tmB3_Methuselah-like	343	593	3.74e-53	NA	NA	NA
B	4	O_bimaculoides	A0A0L8H7m8_A0A0L8H7m8_OCTBM	Ocbimv22021295m	PANTHER	PTHR12011:SF427	NA	4	585	1.4e-35	NA	NA	NA
B	4	O_bimaculoides	A0A0L8H7m8_A0A0L8H7m8_OCTBM	Ocbimv22021295m	Pfam	PF00002	7_transmembrane_receptor_(Secretin_family)	342	572	4.4e-15	IPR000832	GPCR,_family_2,_secretin-like	GO:0004930_GO:0007186_GO:0016021
B	4	O_bimaculoides	A0A0L8H7m8_A0A0L8H7m8_OCTBM	Ocbimv22021295m	Gene3D	G3DSA:1.20.1070.10	NA	328	597	3e-39	NA	NA	NA
B	4	O_bimaculoides	A0A0L8H7m8_A0A0L8H7m8_OCTBM	Ocbimv22021295m	PANTHER	PTHR12011	NA	4	585	1.4e-35	NA	NA	NA
B	3	O_bimaculoides	A0A0L8H5B7_A0A0L8H5B7_OCTBM	Ocbimv22022047m	CDD	cd15040	7tmB2_Adhesion	15	263	3.22e-66	NA	NA	NA
B	3	O_bimaculoides	A0A0L8H5B7_A0A0L8H5B7_OCTBM	Ocbimv22022047m	PANTHER	PTHR12011	NA	12	293	3.5e-62	NA	NA	NA
B	3	O_bimaculoides	A0A0L8H5B7_A0A0L8H5B7_OCTBM	Ocbimv22022047m	PRINTS	PR00249	Secretin-like_GPCR_superfamily_signature	83	106	3.6e-11	IPR000832	GPCR,_family_2,_secretin-like	GO:0004930_GO:0007186_GO:0016021
B	3	O_bimaculoides	A0A0L8H5B7_A0A0L8H5B7_OCTBM	Ocbimv22022047m	PRINTS	PR00249	Secretin-like_GPCR_superfamily_signature	17	41	3.6e-11	IPR000832	GPCR,_family_2,_secretin-like	GO:0004930_GO:0007186_GO:0016021
B	3	O_bimaculoides	A0A0L8H5B7_A0A0L8H5B7_OCTBM	Ocbimv22022047m	PRINTS	PR00249	Secretin-like_GPCR_superfamily_signature	236	257	3.6e-11	IPR000832	GPCR,_family_2,_secretin-like	GO:0004930_GO:0007186_GO:0016021
B	3	O_bimaculoides	A0A0L8H5B7_A0A0L8H5B7_OCTBM	Ocbimv22022047m	PRINTS	PR00249	Secretin-like_GPCR_superfamily_signature	165	190	3.6e-11	IPR000832	GPCR,_family_2,_secretin-like	GO:0004930_GO:0007186_GO:0016021
B	3	O_bimaculoides	A0A0L8H5B7_A0A0L8H5B7_OCTBM	Ocbimv22022047m	Pfam	PF00002	7_transmembrane_receptor_(Secretin_family)	14	250	8.9e-30	IPR000832	GPCR,_family_2,_secretin-like	GO:0004930_GO:0007186_GO:0016021
B	3	O_bimaculoides	A0A0L8H5B7_A0A0L8H5B7_OCTBM	Ocbimv22022047m	Gene3D	G3DSA:1.20.1070.10	NA	2	284	4.8e-59	NA	NA	NA
A	1	O_bimaculoides	A0A0L8H275_A0A0L8H275_OCTBM	Ocbimv22024001m	Pfam	PF00001	7_transmembrane_receptor_(rhodopsin_family)	44	322	4.1e-27	IPR000276	G_protein-coupled_receptor,_rhodopsin-like	GO:0004930_GO:0007186_GO:0016021
A	1	O_bimaculoides	A0A0L8H275_A0A0L8H275_OCTBM	Ocbimv22024001m	PRINTS	PR00237	Rhodopsin-like_GPCR_superfamily_signature	262	286	1.7e-14	IPR000276	G_protein-coupled_receptor,_rhodopsin-like	GO:0004930_GO:0007186_GO:0016021
A	1	O_bimaculoides	A0A0L8H275_A0A0L8H275_OCTBM	Ocbimv22024001m	PRINTS	PR00237	Rhodopsin-like_GPCR_superfamily_signature	29	53	1.7e-14	IPR000276	G_protein-coupled_receptor,_rhodopsin-like	GO:0004930_GO:0007186_GO:0016021
A	1	O_bimaculoides	A0A0L8H275_A0A0L8H275_OCTBM	Ocbimv22024001m	PRINTS	PR00237	Rhodopsin-like_GPCR_superfamily_signature	106	128	1.7e-14	IPR000276	G_protein-coupled_receptor,_rhodopsin-like	GO:0004930_GO:0007186_GO:0016021
A	1	O_bimaculoides	A0A0L8H275_A0A0L8H275_OCTBM	Ocbimv22024001m	PRINTS	PR00237	Rhodopsin-like_GPCR_superfamily_signature	304	330	1.7e-14	IPR000276	G_protein-coupled_receptor,_rhodopsin-like	GO:0004930_GO:0007186_GO:0016021
A	1	O_bimaculoides	A0A0L8H275_A0A0L8H275_OCTBM	Ocbimv22024001m	Gene3D	G3DSA:1.20.1070.10	NA	16	348	3.2e-50	NA	NA	NA
A	1	O_bimaculoides	A0A0L8H275_A0A0L8H275_OCTBM	Ocbimv22024001m	PANTHER	PTHR24241	NA	26	338	3.7e-41	NA	NA	NA
A	1	O_bimaculoides	A0A0L8H275_A0A0L8H275_OCTBM	Ocbimv22024001m	PRINTS	PR00237	Rhodopsin-like_GPCR_superfamily_signature	61	82	1.7e-14	IPR000276	G_protein-coupled_receptor,_rhodopsin-like	GO:0004930_GO:0007186_GO:0016021
A	1	O_bimaculoides	A0A0L8H275_A0A0L8H275_OCTBM	Ocbimv22024001m	SUPERFAMILY	SSF81321	NA	25	360	6.87e-46	NA	NA	NA
B	3	O_bimaculoides	A0A0L8GYU3_A0A0L8GYU3_OCTBM	Ocbimv22025564m	PANTHER	PTHR12011	NA	19	418	4.9e-95	NA	NA	NA
B	3	O_bimaculoides	A0A0L8GYU3_A0A0L8GYU3_OCTBM	Ocbimv22025564m	PRINTS	PR00249	Secretin-like_GPCR_superfamily_signature	307	332	1.6e-12	IPR000832	GPCR,_family_2,_secretin-like	GO:0004930_GO:0007186_GO:0016021
B	3	O_bimaculoides	A0A0L8GYU3_A0A0L8GYU3_OCTBM	Ocbimv22025564m	Pfam	PF00002	7_transmembrane_receptor_(Secretin_family)	157	392	2.4e-37	IPR000832	GPCR,_family_2,_secretin-like	GO:0004930_GO:0007186_GO:0016021
B	3	O_bimaculoides	A0A0L8GYU3_A0A0L8GYU3_OCTBM	Ocbimv22025564m	Gene3D	G3DSA:1.20.1070.10	NA	142	431	6.3e-69	NA	NA	NA
B	3	O_bimaculoides	A0A0L8GYU3_A0A0L8GYU3_OCTBM	Ocbimv22025564m	SUPERFAMILY	SSF81321	NA	157	423	2.2e-09	NA	NA	NA
B	3	O_bimaculoides	A0A0L8GYU3_A0A0L8GYU3_OCTBM	Ocbimv22025564m	PRINTS	PR00249	Secretin-like_GPCR_superfamily_signature	160	184	1.6e-12	IPR000832	GPCR,_family_2,_secretin-like	GO:0004930_GO:0007186_GO:0016021
B	3	O_bimaculoides	A0A0L8GYU3_A0A0L8GYU3_OCTBM	Ocbimv22025564m	PRINTS	PR00249	Secretin-like_GPCR_superfamily_signature	226	249	1.6e-12	IPR000832	GPCR,_family_2,_secretin-like	GO:0004930_GO:0007186_GO:0016021
B	3	O_bimaculoides	A0A0L8GYU3_A0A0L8GYU3_OCTBM	Ocbimv22025564m	CDD	cd15040	7tmB2_Adhesion	155	405	9.95e-83	NA	NA	NA
B	3	O_bimaculoides	A0A0L8GYU3_A0A0L8GYU3_OCTBM	Ocbimv22025564m	Pfam	PF01825	GPCR_proteolysis_site,_GPS,_motif	98	139	4.3e-14	IPR000203	GPS_motif	NA
B	3	O_bimaculoides	A0A0L8GYU3_A0A0L8GYU3_OCTBM	Ocbimv22025564m	Gene3D	G3DSA:2.60.220.50	NA	3	133	4.9e-19	NA	NA	NA
B	3	O_bimaculoides	A0A0L8GYU3_A0A0L8GYU3_OCTBM	Ocbimv22025564m	PRINTS	PR00249	Secretin-like_GPCR_superfamily_signature	378	399	1.6e-12	IPR000832	GPCR,_family_2,_secretin-like	GO:0004930_GO:0007186_GO:0016021
B	3	O_bimaculoides	A0A0L8GYU3_A0A0L8GYU3_OCTBM	Ocbimv22025564m	SMART	SM00303	NA	96	145	2.1e-15	IPR000203	GPS_motif	NA
B	3	O_bimaculoides	A0A0L8GZG7_A0A0L8GZG7_OCTBM	Ocbimv22025567m	PRINTS	PR00249	Secretin-like_GPCR_superfamily_signature	376	397	2.2e-13	IPR000832	GPCR,_family_2,_secretin-like	GO:0004930_GO:0007186_GO:0016021
B	3	O_bimaculoides	A0A0L8GZG7_A0A0L8GZG7_OCTBM	Ocbimv22025567m	Gene3D	G3DSA:2.60.220.50	NA	3	135	3.2e-18	NA	NA	NA
B	3	O_bimaculoides	A0A0L8GZG7_A0A0L8GZG7_OCTBM	Ocbimv22025567m	PANTHER	PTHR12011	NA	34	404	2.6e-95	NA	NA	NA
B	3	O_bimaculoides	A0A0L8GZG7_A0A0L8GZG7_OCTBM	Ocbimv22025567m	PRINTS	PR00249	Secretin-like_GPCR_superfamily_signature	158	182	2.2e-13	IPR000832	GPCR,_family_2,_secretin-like	GO:0004930_GO:0007186_GO:0016021
B	3	O_bimaculoides	A0A0L8GZG7_A0A0L8GZG7_OCTBM	Ocbimv22025567m	PRINTS	PR00249	Secretin-like_GPCR_superfamily_signature	224	247	2.2e-13	IPR000832	GPCR,_family_2,_secretin-like	GO:0004930_GO:0007186_GO:0016021
B	3	O_bimaculoides	A0A0L8GZG7_A0A0L8GZG7_OCTBM	Ocbimv22025567m	PRINTS	PR00249	Secretin-like_GPCR_superfamily_signature	305	330	2.2e-13	IPR000832	GPCR,_family_2,_secretin-like	GO:0004930_GO:0007186_GO:0016021
B	3	O_bimaculoides	A0A0L8GZG7_A0A0L8GZG7_OCTBM	Ocbimv22025567m	SMART	SM00303	NA	95	147	2.3e-11	IPR000203	GPS_motif	NA
B	3	O_bimaculoides	A0A0L8GZG7_A0A0L8GZG7_OCTBM	Ocbimv22025567m	Pfam	PF01825	GPCR_proteolysis_site,_GPS,_motif	97	141	7.8e-15	IPR000203	GPS_motif	NA
B	3	O_bimaculoides	A0A0L8GZG7_A0A0L8GZG7_OCTBM	Ocbimv22025567m	SUPERFAMILY	SSF81321	NA	155	419	1.1e-08	NA	NA	NA
B	3	O_bimaculoides	A0A0L8GZG7_A0A0L8GZG7_OCTBM	Ocbimv22025567m	PRINTS	PR00249	Secretin-like_GPCR_superfamily_signature	262	287	2.2e-13	IPR000832	GPCR,_family_2,_secretin-like	GO:0004930_GO:0007186_GO:0016021
B	3	O_bimaculoides	A0A0L8GZG7_A0A0L8GZG7_OCTBM	Ocbimv22025567m	Pfam	PF00002	7_transmembrane_receptor_(Secretin_family)	155	390	6.5e-39	IPR000832	GPCR,_family_2,_secretin-like	GO:0004930_GO:0007186_GO:0016021
B	3	O_bimaculoides	A0A0L8GZG7_A0A0L8GZG7_OCTBM	Ocbimv22025567m	Gene3D	G3DSA:1.20.1070.10	NA	142	429	1e-69	NA	NA	NA
B	3	O_bimaculoides	A0A0L8GZG7_A0A0L8GZG7_OCTBM	Ocbimv22025567m	CDD	cd15040	7tmB2_Adhesion	156	403	3.29e-84	NA	NA	NA
B	3	O_bimaculoides	A0A0L8GYU7_A0A0L8GYU7_OCTBM	Ocbimv22025569m	Pfam	PF00002	7_transmembrane_receptor_(Secretin_family)	15	250	9.1e-39	IPR000832	GPCR,_family_2,_secretin-like	GO:0004930_GO:0007186_GO:0016021
B	3	O_bimaculoides	A0A0L8GYU7_A0A0L8GYU7_OCTBM	Ocbimv22025569m	PANTHER	PTHR12011	NA	2	264	2.9e-72	NA	NA	NA
B	3	O_bimaculoides	A0A0L8GYU7_A0A0L8GYU7_OCTBM	Ocbimv22025569m	PRINTS	PR00249	Secretin-like_GPCR_superfamily_signature	236	257	1e-15	IPR000832	GPCR,_family_2,_secretin-like	GO:0004930_GO:0007186_GO:0016021
B	3	O_bimaculoides	A0A0L8GYU7_A0A0L8GYU7_OCTBM	Ocbimv22025569m	PRINTS	PR00249	Secretin-like_GPCR_superfamily_signature	165	190	1e-15	IPR000832	GPCR,_family_2,_secretin-like	GO:0004930_GO:0007186_GO:0016021
B	3	O_bimaculoides	A0A0L8GYU7_A0A0L8GYU7_OCTBM	Ocbimv22025569m	CDD	cd15040	7tmB2_Adhesion	13	263	6.26e-77	NA	NA	NA
B	3	O_bimaculoides	A0A0L8GYU7_A0A0L8GYU7_OCTBM	Ocbimv22025569m	PRINTS	PR00249	Secretin-like_GPCR_superfamily_signature	18	42	1e-15	IPR000832	GPCR,_family_2,_secretin-like	GO:0004930_GO:0007186_GO:0016021
B	3	O_bimaculoides	A0A0L8GYU7_A0A0L8GYU7_OCTBM	Ocbimv22025569m	PRINTS	PR00249	Secretin-like_GPCR_superfamily_signature	84	107	1e-15	IPR000832	GPCR,_family_2,_secretin-like	GO:0004930_GO:0007186_GO:0016021
B	3	O_bimaculoides	A0A0L8GYU7_A0A0L8GYU7_OCTBM	Ocbimv22025569m	SUPERFAMILY	SSF81321	NA	16	278	8.33e-11	NA	NA	NA
B	3	O_bimaculoides	A0A0L8GYU7_A0A0L8GYU7_OCTBM	Ocbimv22025569m	PRINTS	PR00249	Secretin-like_GPCR_superfamily_signature	122	147	1e-15	IPR000832	GPCR,_family_2,_secretin-like	GO:0004930_GO:0007186_GO:0016021
B	3	O_bimaculoides	A0A0L8GYU7_A0A0L8GYU7_OCTBM	Ocbimv22025569m	Gene3D	G3DSA:1.20.1070.10	NA	2	292	7.3e-72	NA	NA	NA
B	3	O_bimaculoides	A0A0L8GYR2_A0A0L8GYR2_OCTBM	Ocbimv22025843m	PANTHER	PTHR12011	NA	401	971	2.3e-95	NA	NA	NA
B	3	O_bimaculoides	A0A0L8GYR2_A0A0L8GYR2_OCTBM	Ocbimv22025843m	SUPERFAMILY	SSF52058	NA	3	107	6.55e-18	NA	NA	NA
B	3	O_bimaculoides	A0A0L8GYR2_A0A0L8GYR2_OCTBM	Ocbimv22025843m	Pfam	PF13855	Leucine_rich_repeat	3	54	8.4e-09	IPR001611	Leucine-rich_repeat	GO:0005515
B	3	O_bimaculoides	A0A0L8GYR2_A0A0L8GYR2_OCTBM	Ocbimv22025843m	PRINTS	PR00249	Secretin-like_GPCR_superfamily_signature	934	955	3.3e-14	IPR000832	GPCR,_family_2,_secretin-like	GO:0004930_GO:0007186_GO:0016021
B	3	O_bimaculoides	A0A0L8GYR2_A0A0L8GYR2_OCTBM	Ocbimv22025843m	PRINTS	PR00249	Secretin-like_GPCR_superfamily_signature	863	888	3.3e-14	IPR000832	GPCR,_family_2,_secretin-like	GO:0004930_GO:0007186_GO:0016021
B	3	O_bimaculoides	A0A0L8GYR2_A0A0L8GYR2_OCTBM	Ocbimv22025843m	SMART	SM00303	NA	651	703	5.2e-12	IPR000203	GPS_motif	NA
B	3	O_bimaculoides	A0A0L8GYR2_A0A0L8GYR2_OCTBM	Ocbimv22025843m	Gene3D	G3DSA:3.80.10.10	NA	2	154	8.3e-17	IPR032675	Leucine-rich_repeat_domain_superfamily	NA
B	3	O_bimaculoides	A0A0L8GYR2_A0A0L8GYR2_OCTBM	Ocbimv22025843m	PANTHER	PTHR12011:SF277	NA	401	971	2.3e-95	NA	NA	NA
B	3	O_bimaculoides	A0A0L8GYR2_A0A0L8GYR2_OCTBM	Ocbimv22025843m	SUPERFAMILY	SSF81321	NA	712	985	2.38e-11	NA	NA	NA
B	3	O_bimaculoides	A0A0L8GYR2_A0A0L8GYR2_OCTBM	Ocbimv22025843m	CDD	cd15040	7tmB2_Adhesion	713	961	4.32e-91	NA	NA	NA
B	3	O_bimaculoides	A0A0L8GYR2_A0A0L8GYR2_OCTBM	Ocbimv22025843m	Pfam	PF01825	GPCR_proteolysis_site,_GPS,_motif	654	697	1.1e-12	IPR000203	GPS_motif	NA
B	3	O_bimaculoides	A0A0L8GYR2_A0A0L8GYR2_OCTBM	Ocbimv22025843m	PRINTS	PR00249	Secretin-like_GPCR_superfamily_signature	715	739	3.3e-14	IPR000832	GPCR,_family_2,_secretin-like	GO:0004930_GO:0007186_GO:0016021
B	3	O_bimaculoides	A0A0L8GYR2_A0A0L8GYR2_OCTBM	Ocbimv22025843m	SUPERFAMILY	SSF57302	NA	136	215	5.71e-06	NA	NA	NA
B	3	O_bimaculoides	A0A0L8GYR2_A0A0L8GYR2_OCTBM	Ocbimv22025843m	PRINTS	PR00249	Secretin-like_GPCR_superfamily_signature	781	804	3.3e-14	IPR000832	GPCR,_family_2,_secretin-like	GO:0004930_GO:0007186_GO:0016021
B	3	O_bimaculoides	A0A0L8GYR2_A0A0L8GYR2_OCTBM	Ocbimv22025843m	PRINTS	PR00249	Secretin-like_GPCR_superfamily_signature	820	845	3.3e-14	IPR000832	GPCR,_family_2,_secretin-like	GO:0004930_GO:0007186_GO:0016021
B	3	O_bimaculoides	A0A0L8GYR2_A0A0L8GYR2_OCTBM	Ocbimv22025843m	Pfam	PF00002	7_transmembrane_receptor_(Secretin_family)	712	948	9.3e-34	IPR000832	GPCR,_family_2,_secretin-like	GO:0004930_GO:0007186_GO:0016021
B	3	O_bimaculoides	A0A0L8GYR2_A0A0L8GYR2_OCTBM	Ocbimv22025843m	Gene3D	G3DSA:1.20.1070.10	NA	698	989	2e-68	NA	NA	NA
A	1	O_bimaculoides	A0A0L8GY67_A0A0L8GY67_OCTBM	Ocbimv22026027m	PRINTS	PR00237	Rhodopsin-like_GPCR_superfamily_signature	21	45	1e-15	IPR000276	G_protein-coupled_receptor,_rhodopsin-like	GO:0004930_GO:0007186_GO:0016021
A	1	O_bimaculoides	A0A0L8GY67_A0A0L8GY67_OCTBM	Ocbimv22026027m	SUPERFAMILY	SSF81321	NA	17	215	3.75e-41	NA	NA	NA
A	1	O_bimaculoides	A0A0L8GY67_A0A0L8GY67_OCTBM	Ocbimv22026027m	PRINTS	PR00237	Rhodopsin-like_GPCR_superfamily_signature	324	350	1e-15	IPR000276	G_protein-coupled_receptor,_rhodopsin-like	GO:0004930_GO:0007186_GO:0016021
A	1	O_bimaculoides	A0A0L8GY67_A0A0L8GY67_OCTBM	Ocbimv22026027m	CDD	cd00637	7tm_classA_rhodopsin-like	22	344	1.4e-22	NA	NA	NA
A	1	O_bimaculoides	A0A0L8GY67_A0A0L8GY67_OCTBM	Ocbimv22026027m	PRINTS	PR00237	Rhodopsin-like_GPCR_superfamily_signature	96	118	1e-15	IPR000276	G_protein-coupled_receptor,_rhodopsin-like	GO:0004930_GO:0007186_GO:0016021
A	1	O_bimaculoides	A0A0L8GY67_A0A0L8GY67_OCTBM	Ocbimv22026027m	PRINTS	PR00237	Rhodopsin-like_GPCR_superfamily_signature	187	210	1e-15	IPR000276	G_protein-coupled_receptor,_rhodopsin-like	GO:0004930_GO:0007186_GO:0016021
A	1	O_bimaculoides	A0A0L8GY67_A0A0L8GY67_OCTBM	Ocbimv22026027m	SUPERFAMILY	SSF81321	NA	258	369	3.75e-41	NA	NA	NA
A	1	O_bimaculoides	A0A0L8GY67_A0A0L8GY67_OCTBM	Ocbimv22026027m	Pfam	PF00001	7_transmembrane_receptor_(rhodopsin_family)	36	342	1.7e-21	IPR000276	G_protein-coupled_receptor,_rhodopsin-like	GO:0004930_GO:0007186_GO:0016021
A	1	O_bimaculoides	A0A0L8GY67_A0A0L8GY67_OCTBM	Ocbimv22026027m	PRINTS	PR00237	Rhodopsin-like_GPCR_superfamily_signature	283	307	1e-15	IPR000276	G_protein-coupled_receptor,_rhodopsin-like	GO:0004930_GO:0007186_GO:0016021
A	1	O_bimaculoides	A0A0L8GY67_A0A0L8GY67_OCTBM	Ocbimv22026027m	PRINTS	PR00237	Rhodopsin-like_GPCR_superfamily_signature	53	74	1e-15	IPR000276	G_protein-coupled_receptor,_rhodopsin-like	GO:0004930_GO:0007186_GO:0016021
A	1	O_bimaculoides	A0A0L8GY67_A0A0L8GY67_OCTBM	Ocbimv22026027m	PANTHER	PTHR24228	NA	15	368	1.1e-33	NA	NA	NA
A	1	O_bimaculoides	A0A0L8GY22_A0A0L8GY22_OCTBM	Ocbimv22026028m	PRINTS	PR00237	Rhodopsin-like_GPCR_superfamily_signature	113	135	1.1e-15	IPR000276	G_protein-coupled_receptor,_rhodopsin-like	GO:0004930_GO:0007186_GO:0016021
A	1	O_bimaculoides	A0A0L8GY22_A0A0L8GY22_OCTBM	Ocbimv22026028m	PRINTS	PR00237	Rhodopsin-like_GPCR_superfamily_signature	202	225	1.1e-15	IPR000276	G_protein-coupled_receptor,_rhodopsin-like	GO:0004930_GO:0007186_GO:0016021
A	1	O_bimaculoides	A0A0L8GY22_A0A0L8GY22_OCTBM	Ocbimv22026028m	Gene3D	G3DSA:1.20.1070.10	NA	1	355	5.2e-48	NA	NA	NA
A	1	O_bimaculoides	A0A0L8GY22_A0A0L8GY22_OCTBM	Ocbimv22026028m	Pfam	PF00001	7_transmembrane_receptor_(rhodopsin_family)	49	315	2.9e-26	IPR000276	G_protein-coupled_receptor,_rhodopsin-like	GO:0004930_GO:0007186_GO:0016021
A	1	O_bimaculoides	A0A0L8GY22_A0A0L8GY22_OCTBM	Ocbimv22026028m	PRINTS	PR00237	Rhodopsin-like_GPCR_superfamily_signature	298	324	1.1e-15	IPR000276	G_protein-coupled_receptor,_rhodopsin-like	GO:0004930_GO:0007186_GO:0016021
A	1	O_bimaculoides	A0A0L8GY22_A0A0L8GY22_OCTBM	Ocbimv22026028m	PRINTS	PR00237	Rhodopsin-like_GPCR_superfamily_signature	68	89	1.1e-15	IPR000276	G_protein-coupled_receptor,_rhodopsin-like	GO:0004930_GO:0007186_GO:0016021
A	1	O_bimaculoides	A0A0L8GY22_A0A0L8GY22_OCTBM	Ocbimv22026028m	CDD	cd00637	7tm_classA_rhodopsin-like	62	315	6.3e-26	NA	NA	NA
A	1	O_bimaculoides	A0A0L8GY22_A0A0L8GY22_OCTBM	Ocbimv22026028m	PANTHER	PTHR43916	NA	19	342	5.8e-37	NA	NA	NA
A	1	O_bimaculoides	A0A0L8GY22_A0A0L8GY22_OCTBM	Ocbimv22026028m	PRINTS	PR00237	Rhodopsin-like_GPCR_superfamily_signature	255	279	1.1e-15	IPR000276	G_protein-coupled_receptor,_rhodopsin-like	GO:0004930_GO:0007186_GO:0016021
A	1	O_bimaculoides	A0A0L8GY22_A0A0L8GY22_OCTBM	Ocbimv22026028m	PRINTS	PR00237	Rhodopsin-like_GPCR_superfamily_signature	34	58	1.1e-15	IPR000276	G_protein-coupled_receptor,_rhodopsin-like	GO:0004930_GO:0007186_GO:0016021
A	1	O_bimaculoides	A0A0L8GY22_A0A0L8GY22_OCTBM	Ocbimv22026028m	SUPERFAMILY	SSF81321	NA	20	343	1.28e-47	NA	NA	NA
A	1	O_bimaculoides	A0A0L8I745_A0A0L8I745_OCTBM	Ocbimv22030501m	PRINTS	PR00237	Rhodopsin-like_GPCR_superfamily_signature	98	120	1.2e-17	IPR000276	G_protein-coupled_receptor,_rhodopsin-like	GO:0004930_GO:0007186_GO:0016021
A	1	O_bimaculoides	A0A0L8I745_A0A0L8I745_OCTBM	Ocbimv22030501m	PRINTS	PR00237	Rhodopsin-like_GPCR_superfamily_signature	21	45	1.2e-17	IPR000276	G_protein-coupled_receptor,_rhodopsin-like	GO:0004930_GO:0007186_GO:0016021
A	1	O_bimaculoides	A0A0L8I745_A0A0L8I745_OCTBM	Ocbimv22030501m	Gene3D	G3DSA:1.20.1070.10	NA	2	338	5.1e-46	NA	NA	NA
A	1	O_bimaculoides	A0A0L8I745_A0A0L8I745_OCTBM	Ocbimv22030501m	PRINTS	PR00237	Rhodopsin-like_GPCR_superfamily_signature	183	206	1.2e-17	IPR000276	G_protein-coupled_receptor,_rhodopsin-like	GO:0004930_GO:0007186_GO:0016021
A	1	O_bimaculoides	A0A0L8I745_A0A0L8I745_OCTBM	Ocbimv22030501m	PANTHER	PTHR24243:SF148	NA	17	329	1.6e-35	NA	NA	NA
A	1	O_bimaculoides	A0A0L8I745_A0A0L8I745_OCTBM	Ocbimv22030501m	SUPERFAMILY	SSF81321	NA	20	334	2.93e-43	NA	NA	NA
A	1	O_bimaculoides	A0A0L8I745_A0A0L8I745_OCTBM	Ocbimv22030501m	PRINTS	PR00237	Rhodopsin-like_GPCR_superfamily_signature	284	310	1.2e-17	IPR000276	G_protein-coupled_receptor,_rhodopsin-like	GO:0004930_GO:0007186_GO:0016021
A	1	O_bimaculoides	A0A0L8I745_A0A0L8I745_OCTBM	Ocbimv22030501m	CDD	cd00637	7tm_classA_rhodopsin-like	24	306	2.11e-29	NA	NA	NA
A	1	O_bimaculoides	A0A0L8I745_A0A0L8I745_OCTBM	Ocbimv22030501m	PRINTS	PR00237	Rhodopsin-like_GPCR_superfamily_signature	53	74	1.2e-17	IPR000276	G_protein-coupled_receptor,_rhodopsin-like	GO:0004930_GO:0007186_GO:0016021
A	1	O_bimaculoides	A0A0L8I745_A0A0L8I745_OCTBM	Ocbimv22030501m	PRINTS	PR00237	Rhodopsin-like_GPCR_superfamily_signature	243	267	1.2e-17	IPR000276	G_protein-coupled_receptor,_rhodopsin-like	GO:0004930_GO:0007186_GO:0016021
A	1	O_bimaculoides	A0A0L8I745_A0A0L8I745_OCTBM	Ocbimv22030501m	Pfam	PF00001	7_transmembrane_receptor_(rhodopsin_family)	37	302	8e-25	IPR000276	G_protein-coupled_receptor,_rhodopsin-like	GO:0004930_GO:0007186_GO:0016021
A	1	O_bimaculoides	A0A0L8I745_A0A0L8I745_OCTBM	Ocbimv22030501m	PANTHER	PTHR24243	NA	17	329	1.6e-35	NA	NA	NA
A	1	O_bimaculoides	A0A0L8I6D4_A0A0L8I6D4_OCTBM	Ocbimv22031983m	PANTHER	PTHR43919:SF3	NA	16	296	3e-34	NA	NA	NA
A	1	O_bimaculoides	A0A0L8I6D4_A0A0L8I6D4_OCTBM	Ocbimv22031983m	CDD	cd00637	7tm_classA_rhodopsin-like	20	283	4.67e-24	NA	NA	NA
A	1	O_bimaculoides	A0A0L8I6D4_A0A0L8I6D4_OCTBM	Ocbimv22031983m	Pfam	PF00001	7_transmembrane_receptor_(rhodopsin_family)	32	279	6.3e-23	IPR000276	G_protein-coupled_receptor,_rhodopsin-like	GO:0004930_GO:0007186_GO:0016021
A	1	O_bimaculoides	A0A0L8I6D4_A0A0L8I6D4_OCTBM	Ocbimv22031983m	PRINTS	PR00237	Rhodopsin-like_GPCR_superfamily_signature	223	247	5.4e-13	IPR000276	G_protein-coupled_receptor,_rhodopsin-like	GO:0004930_GO:0007186_GO:0016021
A	1	O_bimaculoides	A0A0L8I6D4_A0A0L8I6D4_OCTBM	Ocbimv22031983m	PRINTS	PR00237	Rhodopsin-like_GPCR_superfamily_signature	48	69	5.4e-13	IPR000276	G_protein-coupled_receptor,_rhodopsin-like	GO:0004930_GO:0007186_GO:0016021
A	1	O_bimaculoides	A0A0L8I6D4_A0A0L8I6D4_OCTBM	Ocbimv22031983m	PRINTS	PR00237	Rhodopsin-like_GPCR_superfamily_signature	16	40	5.4e-13	IPR000276	G_protein-coupled_receptor,_rhodopsin-like	GO:0004930_GO:0007186_GO:0016021
A	1	O_bimaculoides	A0A0L8I6D4_A0A0L8I6D4_OCTBM	Ocbimv22031983m	PANTHER	PTHR43919	NA	16	296	3e-34	NA	NA	NA
A	1	O_bimaculoides	A0A0L8I6D4_A0A0L8I6D4_OCTBM	Ocbimv22031983m	Gene3D	G3DSA:1.20.1070.10	NA	3	299	1.7e-47	NA	NA	NA
A	1	O_bimaculoides	A0A0L8I6D4_A0A0L8I6D4_OCTBM	Ocbimv22031983m	SUPERFAMILY	SSF81321	NA	11	298	1.74e-39	NA	NA	NA
A	1	O_bimaculoides	A0A0L8I6D4_A0A0L8I6D4_OCTBM	Ocbimv22031983m	PRINTS	PR00237	Rhodopsin-like_GPCR_superfamily_signature	91	113	5.4e-13	IPR000276	G_protein-coupled_receptor,_rhodopsin-like	GO:0004930_GO:0007186_GO:0016021
A	1	O_bimaculoides	A0A0L8I6D4_A0A0L8I6D4_OCTBM	Ocbimv22031983m	PRINTS	PR00237	Rhodopsin-like_GPCR_superfamily_signature	261	287	5.4e-13	IPR000276	G_protein-coupled_receptor,_rhodopsin-like	GO:0004930_GO:0007186_GO:0016021
A	2	O_bimaculoides	A0A0L8GI44_A0A0L8GI44_OCTBM	Ocbimv22033043m	PANTHER	PTHR24241:SF76	NA	19	347	5.3e-26	NA	NA	NA
A	2	O_bimaculoides	A0A0L8GI44_A0A0L8GI44_OCTBM	Ocbimv22033043m	CDD	cd00637	7tm_classA_rhodopsin-like	23	335	7.04e-13	NA	NA	NA
A	2	O_bimaculoides	A0A0L8GI44_A0A0L8GI44_OCTBM	Ocbimv22033043m	Pfam	PF00001	7_transmembrane_receptor_(rhodopsin_family)	37	331	1.4e-16	IPR000276	G_protein-coupled_receptor,_rhodopsin-like	GO:0004930_GO:0007186_GO:0016021
A	2	O_bimaculoides	A0A0L8GI44_A0A0L8GI44_OCTBM	Ocbimv22033043m	PANTHER	PTHR24241	NA	19	347	5.3e-26	NA	NA	NA
A	2	O_bimaculoides	A0A0L8GI44_A0A0L8GI44_OCTBM	Ocbimv22033043m	PRINTS	PR00237	Rhodopsin-like_GPCR_superfamily_signature	22	46	4.5e-10	IPR000276	G_protein-coupled_receptor,_rhodopsin-like	GO:0004930_GO:0007186_GO:0016021
A	2	O_bimaculoides	A0A0L8GI44_A0A0L8GI44_OCTBM	Ocbimv22033043m	PRINTS	PR00237	Rhodopsin-like_GPCR_superfamily_signature	187	210	4.5e-10	IPR000276	G_protein-coupled_receptor,_rhodopsin-like	GO:0004930_GO:0007186_GO:0016021
A	2	O_bimaculoides	A0A0L8GI44_A0A0L8GI44_OCTBM	Ocbimv22033043m	PRINTS	PR00237	Rhodopsin-like_GPCR_superfamily_signature	99	121	4.5e-10	IPR000276	G_protein-coupled_receptor,_rhodopsin-like	GO:0004930_GO:0007186_GO:0016021
A	2	O_bimaculoides	A0A0L8GI44_A0A0L8GI44_OCTBM	Ocbimv22033043m	SUPERFAMILY	SSF81321	NA	20	221	1.74e-31	NA	NA	NA
A	2	O_bimaculoides	A0A0L8GI44_A0A0L8GI44_OCTBM	Ocbimv22033043m	PRINTS	PR00237	Rhodopsin-like_GPCR_superfamily_signature	313	339	4.5e-10	IPR000276	G_protein-coupled_receptor,_rhodopsin-like	GO:0004930_GO:0007186_GO:0016021
A	2	O_bimaculoides	A0A0L8GI44_A0A0L8GI44_OCTBM	Ocbimv22033043m	SUPERFAMILY	SSF81321	NA	256	351	1.74e-31	NA	NA	NA
A	2	O_bimaculoides	A0A0L8GI44_A0A0L8GI44_OCTBM	Ocbimv22033043m	Gene3D	G3DSA:1.20.1070.10	NA	9	354	4.6e-36	NA	NA	NA
A	2	O_bimaculoides	A0A0L8GIJ7_A0A0L8GIJ7_OCTBM	Ocbimv22033045m	Gene3D	G3DSA:1.20.1070.10	NA	8	353	6.2e-35	NA	NA	NA
A	2	O_bimaculoides	A0A0L8GIJ7_A0A0L8GIJ7_OCTBM	Ocbimv22033045m	Pfam	PF00001	7_transmembrane_receptor_(rhodopsin_family)	37	330	7.4e-16	IPR000276	G_protein-coupled_receptor,_rhodopsin-like	GO:0004930_GO:0007186_GO:0016021
A	2	O_bimaculoides	A0A0L8GIJ7_A0A0L8GIJ7_OCTBM	Ocbimv22033045m	CDD	cd00637	7tm_classA_rhodopsin-like	38	334	1.57e-12	NA	NA	NA
A	2	O_bimaculoides	A0A0L8GIJ7_A0A0L8GIJ7_OCTBM	Ocbimv22033045m	PANTHER	PTHR24241:SF76	NA	20	346	5.7e-32	NA	NA	NA
A	2	O_bimaculoides	A0A0L8GIJ7_A0A0L8GIJ7_OCTBM	Ocbimv22033045m	SUPERFAMILY	SSF81321	NA	265	349	5.58e-28	NA	NA	NA
A	2	O_bimaculoides	A0A0L8GIJ7_A0A0L8GIJ7_OCTBM	Ocbimv22033045m	PANTHER	PTHR24241	NA	20	346	5.7e-32	NA	NA	NA
A	2	O_bimaculoides	A0A0L8GIJ7_A0A0L8GIJ7_OCTBM	Ocbimv22033045m	PRINTS	PR00237	Rhodopsin-like_GPCR_superfamily_signature	312	338	1.5e-14	IPR000276	G_protein-coupled_receptor,_rhodopsin-like	GO:0004930_GO:0007186_GO:0016021
A	2	O_bimaculoides	A0A0L8GIJ7_A0A0L8GIJ7_OCTBM	Ocbimv22033045m	PRINTS	PR00237	Rhodopsin-like_GPCR_superfamily_signature	22	46	1.5e-14	IPR000276	G_protein-coupled_receptor,_rhodopsin-like	GO:0004930_GO:0007186_GO:0016021
A	2	O_bimaculoides	A0A0L8GIJ7_A0A0L8GIJ7_OCTBM	Ocbimv22033045m	PRINTS	PR00237	Rhodopsin-like_GPCR_superfamily_signature	269	293	1.5e-14	IPR000276	G_protein-coupled_receptor,_rhodopsin-like	GO:0004930_GO:0007186_GO:0016021
A	2	O_bimaculoides	A0A0L8GIJ7_A0A0L8GIJ7_OCTBM	Ocbimv22033045m	SUPERFAMILY	SSF81321	NA	16	218	5.58e-28	NA	NA	NA
A	2	O_bimaculoides	A0A0L8GIJ7_A0A0L8GIJ7_OCTBM	Ocbimv22033045m	PRINTS	PR00237	Rhodopsin-like_GPCR_superfamily_signature	99	121	1.5e-14	IPR000276	G_protein-coupled_receptor,_rhodopsin-like	GO:0004930_GO:0007186_GO:0016021
A	2	O_bimaculoides	A0A0L8GIJ7_A0A0L8GIJ7_OCTBM	Ocbimv22033045m	PRINTS	PR00237	Rhodopsin-like_GPCR_superfamily_signature	186	209	1.5e-14	IPR000276	G_protein-coupled_receptor,_rhodopsin-like	GO:0004930_GO:0007186_GO:0016021
B	4	O_bimaculoides	A0A0L8GGP0_A0A0L8GGP0_OCTBM	Ocbimv22034321m	SUPERFAMILY	SSF81321	NA	364	663	2.75e-05	NA	NA	NA
B	4	O_bimaculoides	A0A0L8GGP0_A0A0L8GGP0_OCTBM	Ocbimv22034321m	PRINTS	PR00249	Secretin-like_GPCR_superfamily_signature	533	558	5.7e-06	IPR000832	GPCR,_family_2,_secretin-like	GO:0004930_GO:0007186_GO:0016021
B	4	O_bimaculoides	A0A0L8GGP0_A0A0L8GGP0_OCTBM	Ocbimv22034321m	PANTHER	PTHR12011	NA	33	330	8.2e-70	NA	NA	NA
B	4	O_bimaculoides	A0A0L8GGP0_A0A0L8GGP0_OCTBM	Ocbimv22034321m	CDD	cd15039	7tmB3_Methuselah-like	373	635	1.09e-83	NA	NA	NA
B	4	O_bimaculoides	A0A0L8GGP0_A0A0L8GGP0_OCTBM	Ocbimv22034321m	PANTHER	PTHR12011	NA	374	658	8.2e-70	NA	NA	NA
B	4	O_bimaculoides	A0A0L8GGP0_A0A0L8GGP0_OCTBM	Ocbimv22034321m	Gene3D	G3DSA:1.20.1070.10	NA	363	651	5.1e-61	NA	NA	NA
B	4	O_bimaculoides	A0A0L8GGP0_A0A0L8GGP0_OCTBM	Ocbimv22034321m	PRINTS	PR00249	Secretin-like_GPCR_superfamily_signature	441	464	5.7e-06	IPR000832	GPCR,_family_2,_secretin-like	GO:0004930_GO:0007186_GO:0016021
B	4	O_bimaculoides	A0A0L8GGP0_A0A0L8GGP0_OCTBM	Ocbimv22034321m	PANTHER	PTHR12011:SF432	NA	374	658	8.2e-70	NA	NA	NA
B	4	O_bimaculoides	A0A0L8GGP0_A0A0L8GGP0_OCTBM	Ocbimv22034321m	PANTHER	PTHR12011:SF432	NA	33	330	8.2e-70	NA	NA	NA
B	4	O_bimaculoides	A0A0L8GGP0_A0A0L8GGP0_OCTBM	Ocbimv22034321m	Pfam	PF00002	7_transmembrane_receptor_(Secretin_family)	377	619	1.9e-29	IPR000832	GPCR,_family_2,_secretin-like	GO:0004930_GO:0007186_GO:0016021
B	4	O_bimaculoides	A0A0L8GGP0_A0A0L8GGP0_OCTBM	Ocbimv22034321m	PRINTS	PR00249	Secretin-like_GPCR_superfamily_signature	378	402	5.7e-06	IPR000832	GPCR,_family_2,_secretin-like	GO:0004930_GO:0007186_GO:0016021
B	4	O_bimaculoides	A0A0L8GFC2_A0A0L8GFC2_OCTBM	Ocbimv22034322m	PANTHER	PTHR12011	NA	45	331	1.6e-63	NA	NA	NA
B	4	O_bimaculoides	A0A0L8GFC2_A0A0L8GFC2_OCTBM	Ocbimv22034322m	SUPERFAMILY	SSF81321	NA	63	347	6.59e-06	NA	NA	NA
B	4	O_bimaculoides	A0A0L8GFC2_A0A0L8GFC2_OCTBM	Ocbimv22034322m	Gene3D	G3DSA:1.20.1070.10	NA	62	355	1.2e-62	NA	NA	NA
B	4	O_bimaculoides	A0A0L8GFC2_A0A0L8GFC2_OCTBM	Ocbimv22034322m	Pfam	PF00002	7_transmembrane_receptor_(Secretin_family)	76	318	7e-30	IPR000832	GPCR,_family_2,_secretin-like	GO:0004930_GO:0007186_GO:0016021
B	4	O_bimaculoides	A0A0L8GFC2_A0A0L8GFC2_OCTBM	Ocbimv22034322m	CDD	cd15039	7tmB3_Methuselah-like	72	334	7.29e-73	NA	NA	NA
B	4	O_bimaculoides	A0A0L8GFC2_A0A0L8GFC2_OCTBM	Ocbimv22034322m	PANTHER	PTHR12011:SF432	NA	45	331	1.6e-63	NA	NA	NA
B	4	O_bimaculoides	A0A0L8GFC2_A0A0L8GFC2_OCTBM	Ocbimv22034322m	PRINTS	PR00249	Secretin-like_GPCR_superfamily_signature	304	325	3.1e-08	IPR000832	GPCR,_family_2,_secretin-like	GO:0004930_GO:0007186_GO:0016021
B	4	O_bimaculoides	A0A0L8GFC2_A0A0L8GFC2_OCTBM	Ocbimv22034322m	PRINTS	PR00249	Secretin-like_GPCR_superfamily_signature	232	257	3.1e-08	IPR000832	GPCR,_family_2,_secretin-like	GO:0004930_GO:0007186_GO:0016021
B	4	O_bimaculoides	A0A0L8GFC2_A0A0L8GFC2_OCTBM	Ocbimv22034322m	PRINTS	PR00249	Secretin-like_GPCR_superfamily_signature	140	163	3.1e-08	IPR000832	GPCR,_family_2,_secretin-like	GO:0004930_GO:0007186_GO:0016021
B	4	O_bimaculoides	A0A0L8GFC2_A0A0L8GFC2_OCTBM	Ocbimv22034322m	PRINTS	PR00249	Secretin-like_GPCR_superfamily_signature	77	101	3.1e-08	IPR000832	GPCR,_family_2,_secretin-like	GO:0004930_GO:0007186_GO:0016021
B	4	O_bimaculoides	A0A0L8GFB6_A0A0L8GFB6_OCTBM	Ocbimv22034323m	SUPERFAMILY	SSF81321	NA	306	502	1.83e-05	NA	NA	NA
B	4	O_bimaculoides	A0A0L8GFB6_A0A0L8GFB6_OCTBM	Ocbimv22034323m	PRINTS	PR00249	Secretin-like_GPCR_superfamily_signature	383	406	1.2e-05	IPR000832	GPCR,_family_2,_secretin-like	GO:0004930_GO:0007186_GO:0016021
B	4	O_bimaculoides	A0A0L8GFB6_A0A0L8GFB6_OCTBM	Ocbimv22034323m	CDD	cd15039	7tmB3_Methuselah-like	315	500	7.34e-61	NA	NA	NA
B	4	O_bimaculoides	A0A0L8GFB6_A0A0L8GFB6_OCTBM	Ocbimv22034323m	PRINTS	PR00249	Secretin-like_GPCR_superfamily_signature	475	500	1.2e-05	IPR000832	GPCR,_family_2,_secretin-like	GO:0004930_GO:0007186_GO:0016021
B	4	O_bimaculoides	A0A0L8GFB6_A0A0L8GFB6_OCTBM	Ocbimv22034323m	PRINTS	PR00249	Secretin-like_GPCR_superfamily_signature	320	344	1.2e-05	IPR000832	GPCR,_family_2,_secretin-like	GO:0004930_GO:0007186_GO:0016021
B	4	O_bimaculoides	A0A0L8GFB6_A0A0L8GFB6_OCTBM	Ocbimv22034323m	PANTHER	PTHR12011	NA	317	497	2.6e-50	NA	NA	NA
B	4	O_bimaculoides	A0A0L8GFB6_A0A0L8GFB6_OCTBM	Ocbimv22034323m	Gene3D	G3DSA:1.20.1070.10	NA	303	501	1.4e-44	NA	NA	NA
B	4	O_bimaculoides	A0A0L8GFB6_A0A0L8GFB6_OCTBM	Ocbimv22034323m	PANTHER	PTHR12011:SF432	NA	40	304	2.6e-50	NA	NA	NA
B	4	O_bimaculoides	A0A0L8GFB6_A0A0L8GFB6_OCTBM	Ocbimv22034323m	PANTHER	PTHR12011	NA	40	304	2.6e-50	NA	NA	NA
B	4	O_bimaculoides	A0A0L8GFB6_A0A0L8GFB6_OCTBM	Ocbimv22034323m	Pfam	PF00002	7_transmembrane_receptor_(Secretin_family)	319	496	5.1e-26	IPR000832	GPCR,_family_2,_secretin-like	GO:0004930_GO:0007186_GO:0016021
B	4	O_bimaculoides	A0A0L8GFB6_A0A0L8GFB6_OCTBM	Ocbimv22034323m	PANTHER	PTHR12011:SF432	NA	317	497	2.6e-50	NA	NA	NA
B	4	O_bimaculoides	A0A0L8GFJ1_A0A0L8GFJ1_OCTBM	Ocbimv22034324m	PRINTS	PR00249	Secretin-like_GPCR_superfamily_signature	175	199	5.1e-07	IPR000832	GPCR,_family_2,_secretin-like	GO:0004930_GO:0007186_GO:0016021
B	4	O_bimaculoides	A0A0L8GFJ1_A0A0L8GFJ1_OCTBM	Ocbimv22034324m	Pfam	PF00002	7_transmembrane_receptor_(Secretin_family)	174	416	6.3e-30	IPR000832	GPCR,_family_2,_secretin-like	GO:0004930_GO:0007186_GO:0016021
B	4	O_bimaculoides	A0A0L8GFJ1_A0A0L8GFJ1_OCTBM	Ocbimv22034324m	CDD	cd15039	7tmB3_Methuselah-like	170	430	2.42e-80	NA	NA	NA
B	4	O_bimaculoides	A0A0L8GFJ1_A0A0L8GFJ1_OCTBM	Ocbimv22034324m	Gene3D	G3DSA:1.20.1070.10	NA	157	452	1.3e-63	NA	NA	NA
B	4	O_bimaculoides	A0A0L8GFJ1_A0A0L8GFJ1_OCTBM	Ocbimv22034324m	PRINTS	PR00249	Secretin-like_GPCR_superfamily_signature	238	261	5.1e-07	IPR000832	GPCR,_family_2,_secretin-like	GO:0004930_GO:0007186_GO:0016021
B	4	O_bimaculoides	A0A0L8GFJ1_A0A0L8GFJ1_OCTBM	Ocbimv22034324m	PRINTS	PR00249	Secretin-like_GPCR_superfamily_signature	330	355	5.1e-07	IPR000832	GPCR,_family_2,_secretin-like	GO:0004930_GO:0007186_GO:0016021
B	4	O_bimaculoides	A0A0L8GFJ1_A0A0L8GFJ1_OCTBM	Ocbimv22034324m	PANTHER	PTHR12011:SF432	NA	23	90	4e-72	NA	NA	NA
B	4	O_bimaculoides	A0A0L8GFJ1_A0A0L8GFJ1_OCTBM	Ocbimv22034324m	PANTHER	PTHR12011	NA	152	435	4e-72	NA	NA	NA
B	4	O_bimaculoides	A0A0L8GFJ1_A0A0L8GFJ1_OCTBM	Ocbimv22034324m	SUPERFAMILY	SSF81321	NA	163	436	3.11e-06	NA	NA	NA
B	4	O_bimaculoides	A0A0L8GFJ1_A0A0L8GFJ1_OCTBM	Ocbimv22034324m	PANTHER	PTHR12011	NA	23	90	4e-72	NA	NA	NA
B	4	O_bimaculoides	A0A0L8GFJ1_A0A0L8GFJ1_OCTBM	Ocbimv22034324m	PANTHER	PTHR12011:SF432	NA	152	435	4e-72	NA	NA	NA
B	4	O_bimaculoides	A0A0L8GFU5_A0A0L8GFU5_OCTBM	Ocbimv22034325m	PRINTS	PR00249	Secretin-like_GPCR_superfamily_signature	389	413	1.2e-05	IPR000832	GPCR,_family_2,_secretin-like	GO:0004930_GO:0007186_GO:0016021
B	4	O_bimaculoides	A0A0L8GFU5_A0A0L8GFU5_OCTBM	Ocbimv22034325m	PRINTS	PR00249	Secretin-like_GPCR_superfamily_signature	495	520	1.2e-05	IPR000832	GPCR,_family_2,_secretin-like	GO:0004930_GO:0007186_GO:0016021
B	4	O_bimaculoides	A0A0L8GFU5_A0A0L8GFU5_OCTBM	Ocbimv22034325m	SUPERFAMILY	SSF81321	NA	376	650	7.69e-06	NA	NA	NA
B	4	O_bimaculoides	A0A0L8GFU5_A0A0L8GFU5_OCTBM	Ocbimv22034325m	PANTHER	PTHR12011:SF432	NA	43	148	8.1e-68	NA	NA	NA
B	4	O_bimaculoides	A0A0L8GFU5_A0A0L8GFU5_OCTBM	Ocbimv22034325m	CDD	cd15039	7tmB3_Methuselah-like	384	649	1.88e-83	NA	NA	NA
B	4	O_bimaculoides	A0A0L8GFU5_A0A0L8GFU5_OCTBM	Ocbimv22034325m	Pfam	PF00002	7_transmembrane_receptor_(Secretin_family)	388	630	6.6e-31	IPR000832	GPCR,_family_2,_secretin-like	GO:0004930_GO:0007186_GO:0016021
B	4	O_bimaculoides	A0A0L8GFU5_A0A0L8GFU5_OCTBM	Ocbimv22034325m	PANTHER	PTHR12011:SF432	NA	363	642	8.1e-68	NA	NA	NA
B	4	O_bimaculoides	A0A0L8GFU5_A0A0L8GFU5_OCTBM	Ocbimv22034325m	PRINTS	PR00249	Secretin-like_GPCR_superfamily_signature	544	569	1.2e-05	IPR000832	GPCR,_family_2,_secretin-like	GO:0004930_GO:0007186_GO:0016021
B	4	O_bimaculoides	A0A0L8GFU5_A0A0L8GFU5_OCTBM	Ocbimv22034325m	PANTHER	PTHR12011	NA	43	148	8.1e-68	NA	NA	NA
B	4	O_bimaculoides	A0A0L8GFU5_A0A0L8GFU5_OCTBM	Ocbimv22034325m	Gene3D	G3DSA:1.20.1070.10	NA	371	662	4.6e-62	NA	NA	NA
B	4	O_bimaculoides	A0A0L8GFU5_A0A0L8GFU5_OCTBM	Ocbimv22034325m	PANTHER	PTHR12011	NA	363	642	8.1e-68	NA	NA	NA
B	4	O_bimaculoides	A0A0L8GGP4_A0A0L8GGP4_OCTBM	Ocbimv22034326m	PRINTS	PR00249	Secretin-like_GPCR_superfamily_signature	547	572	3.8e-07	IPR000832	GPCR,_family_2,_secretin-like	GO:0004930_GO:0007186_GO:0016021
B	4	O_bimaculoides	A0A0L8GGP4_A0A0L8GGP4_OCTBM	Ocbimv22034326m	PANTHER	PTHR12011:SF432	NA	365	659	5.6e-70	NA	NA	NA
B	4	O_bimaculoides	A0A0L8GGP4_A0A0L8GGP4_OCTBM	Ocbimv22034326m	Pfam	PF00002	7_transmembrane_receptor_(Secretin_family)	392	633	9.9e-31	IPR000832	GPCR,_family_2,_secretin-like	GO:0004930_GO:0007186_GO:0016021
B	4	O_bimaculoides	A0A0L8GGP4_A0A0L8GGP4_OCTBM	Ocbimv22034326m	CDD	cd15039	7tmB3_Methuselah-like	387	649	7.28e-89	NA	NA	NA
B	4	O_bimaculoides	A0A0L8GGP4_A0A0L8GGP4_OCTBM	Ocbimv22034326m	PRINTS	PR00249	Secretin-like_GPCR_superfamily_signature	619	640	3.8e-07	IPR000832	GPCR,_family_2,_secretin-like	GO:0004930_GO:0007186_GO:0016021
B	4	O_bimaculoides	A0A0L8GGP4_A0A0L8GGP4_OCTBM	Ocbimv22034326m	PRINTS	PR00249	Secretin-like_GPCR_superfamily_signature	455	478	3.8e-07	IPR000832	GPCR,_family_2,_secretin-like	GO:0004930_GO:0007186_GO:0016021
B	4	O_bimaculoides	A0A0L8GGP4_A0A0L8GGP4_OCTBM	Ocbimv22034326m	PRINTS	PR00249	Secretin-like_GPCR_superfamily_signature	392	416	3.8e-07	IPR000832	GPCR,_family_2,_secretin-like	GO:0004930_GO:0007186_GO:0016021
B	4	O_bimaculoides	A0A0L8GGP4_A0A0L8GGP4_OCTBM	Ocbimv22034326m	SUPERFAMILY	SSF81321	NA	377	649	1.83e-07	NA	NA	NA
B	4	O_bimaculoides	A0A0L8GGP4_A0A0L8GGP4_OCTBM	Ocbimv22034326m	PANTHER	PTHR12011	NA	43	157	5.6e-70	NA	NA	NA
B	4	O_bimaculoides	A0A0L8GGP4_A0A0L8GGP4_OCTBM	Ocbimv22034326m	PANTHER	PTHR12011:SF432	NA	43	157	5.6e-70	NA	NA	NA
B	4	O_bimaculoides	A0A0L8GGP4_A0A0L8GGP4_OCTBM	Ocbimv22034326m	Gene3D	G3DSA:1.20.1070.10	NA	378	662	1.5e-61	NA	NA	NA
B	4	O_bimaculoides	A0A0L8GGP4_A0A0L8GGP4_OCTBM	Ocbimv22034326m	PANTHER	PTHR12011	NA	365	659	5.6e-70	NA	NA	NA
B	4	O_bimaculoides	A0A0L8GFC1_A0A0L8GFC1_OCTBM	Ocbimv22034328m	PANTHER	PTHR12011:SF432	NA	29	287	1.2e-65	NA	NA	NA
B	4	O_bimaculoides	A0A0L8GFC1_A0A0L8GFC1_OCTBM	Ocbimv22034328m	Pfam	PF00002	7_transmembrane_receptor_(Secretin_family)	34	276	1.6e-26	IPR000832	GPCR,_family_2,_secretin-like	GO:0004930_GO:0007186_GO:0016021
B	4	O_bimaculoides	A0A0L8GFC1_A0A0L8GFC1_OCTBM	Ocbimv22034328m	Gene3D	G3DSA:1.20.1070.10	NA	17	297	2.3e-57	NA	NA	NA
B	4	O_bimaculoides	A0A0L8GFC1_A0A0L8GFC1_OCTBM	Ocbimv22034328m	PRINTS	PR00249	Secretin-like_GPCR_superfamily_signature	35	59	1.5e-05	IPR000832	GPCR,_family_2,_secretin-like	GO:0004930_GO:0007186_GO:0016021
B	4	O_bimaculoides	A0A0L8GFC1_A0A0L8GFC1_OCTBM	Ocbimv22034328m	PANTHER	PTHR12011	NA	29	287	1.2e-65	NA	NA	NA
B	4	O_bimaculoides	A0A0L8GFC1_A0A0L8GFC1_OCTBM	Ocbimv22034328m	PRINTS	PR00249	Secretin-like_GPCR_superfamily_signature	190	215	1.5e-05	IPR000832	GPCR,_family_2,_secretin-like	GO:0004930_GO:0007186_GO:0016021
B	4	O_bimaculoides	A0A0L8GFC1_A0A0L8GFC1_OCTBM	Ocbimv22034328m	PRINTS	PR00249	Secretin-like_GPCR_superfamily_signature	98	121	1.5e-05	IPR000832	GPCR,_family_2,_secretin-like	GO:0004930_GO:0007186_GO:0016021
B	4	O_bimaculoides	A0A0L8GFC1_A0A0L8GFC1_OCTBM	Ocbimv22034328m	CDD	cd15039	7tmB3_Methuselah-like	30	287	4.27e-73	NA	NA	NA
B	4	O_bimaculoides	A0A0L8GFJ3_A0A0L8GFJ3_OCTBM	Ocbimv22034329m	PANTHER	PTHR12011:SF432	NA	344	657	1.5e-69	NA	NA	NA
B	4	O_bimaculoides	A0A0L8GFJ3_A0A0L8GFJ3_OCTBM	Ocbimv22034329m	Gene3D	G3DSA:1.20.1070.10	NA	361	653	1.3e-59	NA	NA	NA
B	4	O_bimaculoides	A0A0L8GFJ3_A0A0L8GFJ3_OCTBM	Ocbimv22034329m	PANTHER	PTHR12011	NA	344	657	1.5e-69	NA	NA	NA
B	4	O_bimaculoides	A0A0L8GFJ3_A0A0L8GFJ3_OCTBM	Ocbimv22034329m	CDD	cd15039	7tmB3_Methuselah-like	374	634	4.37e-83	NA	NA	NA
B	4	O_bimaculoides	A0A0L8GFJ3_A0A0L8GFJ3_OCTBM	Ocbimv22034329m	Pfam	PF00002	7_transmembrane_receptor_(Secretin_family)	378	620	3.3e-26	IPR000832	GPCR,_family_2,_secretin-like	GO:0004930_GO:0007186_GO:0016021
B	4	O_bimaculoides	A0A0L8GFJ3_A0A0L8GFJ3_OCTBM	Ocbimv22034329m	PANTHER	PTHR12011	NA	43	162	1.5e-69	NA	NA	NA
B	4	O_bimaculoides	A0A0L8GFJ3_A0A0L8GFJ3_OCTBM	Ocbimv22034329m	PANTHER	PTHR12011:SF432	NA	43	162	1.5e-69	NA	NA	NA
B	4	O_bimaculoides	A0A0L8GFV0_A0A0L8GFV0_OCTBM	Ocbimv22034330m	PANTHER	PTHR12011:SF432	NA	88	408	5.6e-71	NA	NA	NA
B	4	O_bimaculoides	A0A0L8GFV0_A0A0L8GFV0_OCTBM	Ocbimv22034330m	PRINTS	PR00249	Secretin-like_GPCR_superfamily_signature	189	212	1.8e-05	IPR000832	GPCR,_family_2,_secretin-like	GO:0004930_GO:0007186_GO:0016021
B	4	O_bimaculoides	A0A0L8GFV0_A0A0L8GFV0_OCTBM	Ocbimv22034330m	PRINTS	PR00249	Secretin-like_GPCR_superfamily_signature	353	374	1.8e-05	IPR000832	GPCR,_family_2,_secretin-like	GO:0004930_GO:0007186_GO:0016021
B	4	O_bimaculoides	A0A0L8GFV0_A0A0L8GFV0_OCTBM	Ocbimv22034330m	Pfam	PF00002	7_transmembrane_receptor_(Secretin_family)	125	367	9.3e-26	IPR000832	GPCR,_family_2,_secretin-like	GO:0004930_GO:0007186_GO:0016021
B	4	O_bimaculoides	A0A0L8GFV0_A0A0L8GFV0_OCTBM	Ocbimv22034330m	PANTHER	PTHR12011	NA	88	408	5.6e-71	NA	NA	NA
B	4	O_bimaculoides	A0A0L8GFV0_A0A0L8GFV0_OCTBM	Ocbimv22034330m	Gene3D	G3DSA:1.20.1070.10	NA	108	405	1.4e-59	NA	NA	NA
B	4	O_bimaculoides	A0A0L8GFV0_A0A0L8GFV0_OCTBM	Ocbimv22034330m	SUPERFAMILY	SSF81321	NA	113	390	5.77e-07	NA	NA	NA
B	4	O_bimaculoides	A0A0L8GFV0_A0A0L8GFV0_OCTBM	Ocbimv22034330m	PRINTS	PR00249	Secretin-like_GPCR_superfamily_signature	281	306	1.8e-05	IPR000832	GPCR,_family_2,_secretin-like	GO:0004930_GO:0007186_GO:0016021
B	4	O_bimaculoides	A0A0L8GFV0_A0A0L8GFV0_OCTBM	Ocbimv22034330m	PRINTS	PR00249	Secretin-like_GPCR_superfamily_signature	126	150	1.8e-05	IPR000832	GPCR,_family_2,_secretin-like	GO:0004930_GO:0007186_GO:0016021
B	4	O_bimaculoides	A0A0L8GFV0_A0A0L8GFV0_OCTBM	Ocbimv22034330m	CDD	cd15039	7tmB3_Methuselah-like	121	383	7.07e-81	NA	NA	NA
B	4	O_bimaculoides	A0A0L8GGP7_A0A0L8GGP7_OCTBM	Ocbimv22034331m	Pfam	PF00002	7_transmembrane_receptor_(Secretin_family)	114	281	1.6e-15	IPR000832	GPCR,_family_2,_secretin-like	GO:0004930_GO:0007186_GO:0016021
B	4	O_bimaculoides	A0A0L8GGP7_A0A0L8GGP7_OCTBM	Ocbimv22034331m	PANTHER	PTHR12011	NA	56	113	7.4e-47	NA	NA	NA
B	4	O_bimaculoides	A0A0L8GGP7_A0A0L8GGP7_OCTBM	Ocbimv22034331m	Gene3D	G3DSA:1.20.1070.10	NA	111	312	9.1e-39	NA	NA	NA
B	4	O_bimaculoides	A0A0L8GGP7_A0A0L8GGP7_OCTBM	Ocbimv22034331m	PANTHER	PTHR12011	NA	114	304	7.4e-47	NA	NA	NA
B	4	O_bimaculoides	A0A0L8GGP7_A0A0L8GGP7_OCTBM	Ocbimv22034331m	PANTHER	PTHR12011:SF432	NA	114	304	7.4e-47	NA	NA	NA
B	4	O_bimaculoides	A0A0L8GGP7_A0A0L8GGP7_OCTBM	Ocbimv22034331m	PANTHER	PTHR12011:SF432	NA	56	113	7.4e-47	NA	NA	NA
B	4	O_bimaculoides	A0A0L8GGP7_A0A0L8GGP7_OCTBM	Ocbimv22034331m	CDD	cd15039	7tmB3_Methuselah-like	78	297	5.11e-58	NA	NA	NA
B	4	O_bimaculoides	A0A0L8GFD1_A0A0L8GFD1_OCTBM	Ocbimv22034332m	PANTHER	PTHR12011:SF432	NA	40	279	5e-71	NA	NA	NA
B	4	O_bimaculoides	A0A0L8GFD1_A0A0L8GFD1_OCTBM	Ocbimv22034332m	CDD	cd15039	7tmB3_Methuselah-like	362	626	4.53e-84	NA	NA	NA
B	4	O_bimaculoides	A0A0L8GFD1_A0A0L8GFD1_OCTBM	Ocbimv22034332m	PANTHER	PTHR12011:SF432	NA	325	647	5e-71	NA	NA	NA
B	4	O_bimaculoides	A0A0L8GFD1_A0A0L8GFD1_OCTBM	Ocbimv22034332m	PANTHER	PTHR12011	NA	40	279	5e-71	NA	NA	NA
B	4	O_bimaculoides	A0A0L8GFD1_A0A0L8GFD1_OCTBM	Ocbimv22034332m	Pfam	PF00002	7_transmembrane_receptor_(Secretin_family)	367	608	5.4e-31	IPR000832	GPCR,_family_2,_secretin-like	GO:0004930_GO:0007186_GO:0016021
B	4	O_bimaculoides	A0A0L8GFD1_A0A0L8GFD1_OCTBM	Ocbimv22034332m	PRINTS	PR00249	Secretin-like_GPCR_superfamily_signature	522	547	1.9e-07	IPR000832	GPCR,_family_2,_secretin-like	GO:0004930_GO:0007186_GO:0016021
B	4	O_bimaculoides	A0A0L8GFD1_A0A0L8GFD1_OCTBM	Ocbimv22034332m	PRINTS	PR00249	Secretin-like_GPCR_superfamily_signature	430	453	1.9e-07	IPR000832	GPCR,_family_2,_secretin-like	GO:0004930_GO:0007186_GO:0016021
B	4	O_bimaculoides	A0A0L8GFD1_A0A0L8GFD1_OCTBM	Ocbimv22034332m	PRINTS	PR00249	Secretin-like_GPCR_superfamily_signature	367	391	1.9e-07	IPR000832	GPCR,_family_2,_secretin-like	GO:0004930_GO:0007186_GO:0016021
B	4	O_bimaculoides	A0A0L8GFD1_A0A0L8GFD1_OCTBM	Ocbimv22034332m	Gene3D	G3DSA:1.20.1070.10	NA	355	646	3.3e-62	NA	NA	NA
B	4	O_bimaculoides	A0A0L8GFD1_A0A0L8GFD1_OCTBM	Ocbimv22034332m	SUPERFAMILY	SSF81321	NA	346	639	7.96e-06	NA	NA	NA
B	4	O_bimaculoides	A0A0L8GFD1_A0A0L8GFD1_OCTBM	Ocbimv22034332m	PRINTS	PR00249	Secretin-like_GPCR_superfamily_signature	594	615	1.9e-07	IPR000832	GPCR,_family_2,_secretin-like	GO:0004930_GO:0007186_GO:0016021
B	4	O_bimaculoides	A0A0L8GFD1_A0A0L8GFD1_OCTBM	Ocbimv22034332m	PANTHER	PTHR12011	NA	325	647	5e-71	NA	NA	NA
B	4	O_bimaculoides	A0A0L8GFC5_A0A0L8GFC5_OCTBM	Ocbimv22034333m	Pfam	PF00002	7_transmembrane_receptor_(Secretin_family)	335	577	7.8e-28	IPR000832	GPCR,_family_2,_secretin-like	GO:0004930_GO:0007186_GO:0016021
B	4	O_bimaculoides	A0A0L8GFC5_A0A0L8GFC5_OCTBM	Ocbimv22034333m	Gene3D	G3DSA:1.20.1070.10	NA	319	614	6.8e-60	NA	NA	NA
B	4	O_bimaculoides	A0A0L8GFC5_A0A0L8GFC5_OCTBM	Ocbimv22034333m	CDD	cd15039	7tmB3_Methuselah-like	331	593	1.59e-82	NA	NA	NA
B	4	O_bimaculoides	A0A0L8GFC5_A0A0L8GFC5_OCTBM	Ocbimv22034333m	PANTHER	PTHR12011	NA	36	135	7.8e-73	NA	NA	NA
B	4	O_bimaculoides	A0A0L8GFC5_A0A0L8GFC5_OCTBM	Ocbimv22034333m	PRINTS	PR00249	Secretin-like_GPCR_superfamily_signature	563	584	4.9e-07	IPR000832	GPCR,_family_2,_secretin-like	GO:0004930_GO:0007186_GO:0016021
B	4	O_bimaculoides	A0A0L8GFC5_A0A0L8GFC5_OCTBM	Ocbimv22034333m	PANTHER	PTHR12011	NA	282	618	7.8e-73	NA	NA	NA
B	4	O_bimaculoides	A0A0L8GFC5_A0A0L8GFC5_OCTBM	Ocbimv22034333m	PRINTS	PR00249	Secretin-like_GPCR_superfamily_signature	336	360	4.9e-07	IPR000832	GPCR,_family_2,_secretin-like	GO:0004930_GO:0007186_GO:0016021
B	4	O_bimaculoides	A0A0L8GFC5_A0A0L8GFC5_OCTBM	Ocbimv22034333m	PRINTS	PR00249	Secretin-like_GPCR_superfamily_signature	399	422	4.9e-07	IPR000832	GPCR,_family_2,_secretin-like	GO:0004930_GO:0007186_GO:0016021
B	4	O_bimaculoides	A0A0L8GFC5_A0A0L8GFC5_OCTBM	Ocbimv22034333m	PANTHER	PTHR12011:SF432	NA	36	135	7.8e-73	NA	NA	NA
B	4	O_bimaculoides	A0A0L8GFC5_A0A0L8GFC5_OCTBM	Ocbimv22034333m	PRINTS	PR00249	Secretin-like_GPCR_superfamily_signature	491	516	4.9e-07	IPR000832	GPCR,_family_2,_secretin-like	GO:0004930_GO:0007186_GO:0016021
B	4	O_bimaculoides	A0A0L8GFC5_A0A0L8GFC5_OCTBM	Ocbimv22034333m	PANTHER	PTHR12011:SF432	NA	282	618	7.8e-73	NA	NA	NA
B	4	O_bimaculoides	A0A0L8GFJ7_A0A0L8GFJ7_OCTBM	Ocbimv22034334m	PANTHER	PTHR12011	NA	19	134	1.7e-73	NA	NA	NA
B	4	O_bimaculoides	A0A0L8GFJ7_A0A0L8GFJ7_OCTBM	Ocbimv22034334m	PRINTS	PR00249	Secretin-like_GPCR_superfamily_signature	570	591	9.4e-08	IPR000832	GPCR,_family_2,_secretin-like	GO:0004930_GO:0007186_GO:0016021
B	4	O_bimaculoides	A0A0L8GFJ7_A0A0L8GFJ7_OCTBM	Ocbimv22034334m	PANTHER	PTHR12011:SF432	NA	296	626	1.7e-73	NA	NA	NA
B	4	O_bimaculoides	A0A0L8GFJ7_A0A0L8GFJ7_OCTBM	Ocbimv22034334m	PANTHER	PTHR12011:SF432	NA	19	134	1.7e-73	NA	NA	NA
B	4	O_bimaculoides	A0A0L8GFJ7_A0A0L8GFJ7_OCTBM	Ocbimv22034334m	PRINTS	PR00249	Secretin-like_GPCR_superfamily_signature	498	523	9.4e-08	IPR000832	GPCR,_family_2,_secretin-like	GO:0004930_GO:0007186_GO:0016021
B	4	O_bimaculoides	A0A0L8GFJ7_A0A0L8GFJ7_OCTBM	Ocbimv22034334m	SUPERFAMILY	SSF81321	NA	339	613	2.38e-11	NA	NA	NA
B	4	O_bimaculoides	A0A0L8GFJ7_A0A0L8GFJ7_OCTBM	Ocbimv22034334m	Pfam	PF00002	7_transmembrane_receptor_(Secretin_family)	342	584	1.4e-27	IPR000832	GPCR,_family_2,_secretin-like	GO:0004930_GO:0007186_GO:0016021
B	4	O_bimaculoides	A0A0L8GFJ7_A0A0L8GFJ7_OCTBM	Ocbimv22034334m	PRINTS	PR00249	Secretin-like_GPCR_superfamily_signature	406	429	9.4e-08	IPR000832	GPCR,_family_2,_secretin-like	GO:0004930_GO:0007186_GO:0016021
B	4	O_bimaculoides	A0A0L8GFJ7_A0A0L8GFJ7_OCTBM	Ocbimv22034334m	CDD	cd15039	7tmB3_Methuselah-like	338	600	1.07e-81	NA	NA	NA
B	4	O_bimaculoides	A0A0L8GFJ7_A0A0L8GFJ7_OCTBM	Ocbimv22034334m	PANTHER	PTHR12011	NA	296	626	1.7e-73	NA	NA	NA
B	4	O_bimaculoides	A0A0L8GFJ7_A0A0L8GFJ7_OCTBM	Ocbimv22034334m	PRINTS	PR00249	Secretin-like_GPCR_superfamily_signature	343	367	9.4e-08	IPR000832	GPCR,_family_2,_secretin-like	GO:0004930_GO:0007186_GO:0016021
B	4	O_bimaculoides	A0A0L8GFJ7_A0A0L8GFJ7_OCTBM	Ocbimv22034334m	Gene3D	G3DSA:1.20.1070.10	NA	326	622	5e-61	NA	NA	NA
B	4	O_bimaculoides	A0A0L8GFV5_A0A0L8GFV5_OCTBM	Ocbimv22034335m	PRINTS	PR00249	Secretin-like_GPCR_superfamily_signature	310	334	6.2e-07	IPR000832	GPCR,_family_2,_secretin-like	GO:0004930_GO:0007186_GO:0016021
B	4	O_bimaculoides	A0A0L8GFV5_A0A0L8GFV5_OCTBM	Ocbimv22034335m	PRINTS	PR00249	Secretin-like_GPCR_superfamily_signature	465	490	6.2e-07	IPR000832	GPCR,_family_2,_secretin-like	GO:0004930_GO:0007186_GO:0016021
B	4	O_bimaculoides	A0A0L8GFV5_A0A0L8GFV5_OCTBM	Ocbimv22034335m	PANTHER	PTHR12011:SF432	NA	49	175	2.5e-64	NA	NA	NA
B	4	O_bimaculoides	A0A0L8GFV5_A0A0L8GFV5_OCTBM	Ocbimv22034335m	Gene3D	G3DSA:1.20.1070.10	NA	299	585	6.1e-54	NA	NA	NA
B	4	O_bimaculoides	A0A0L8GFV5_A0A0L8GFV5_OCTBM	Ocbimv22034335m	PANTHER	PTHR12011:SF432	NA	266	566	2.5e-64	NA	NA	NA
B	4	O_bimaculoides	A0A0L8GFV5_A0A0L8GFV5_OCTBM	Ocbimv22034335m	PRINTS	PR00249	Secretin-like_GPCR_superfamily_signature	373	396	6.2e-07	IPR000832	GPCR,_family_2,_secretin-like	GO:0004930_GO:0007186_GO:0016021
B	4	O_bimaculoides	A0A0L8GFV5_A0A0L8GFV5_OCTBM	Ocbimv22034335m	Pfam	PF00002	7_transmembrane_receptor_(Secretin_family)	308	551	5.8e-25	IPR000832	GPCR,_family_2,_secretin-like	GO:0004930_GO:0007186_GO:0016021
B	4	O_bimaculoides	A0A0L8GFV5_A0A0L8GFV5_OCTBM	Ocbimv22034335m	CDD	cd15039	7tmB3_Methuselah-like	309	567	7.47e-74	NA	NA	NA
B	4	O_bimaculoides	A0A0L8GFV5_A0A0L8GFV5_OCTBM	Ocbimv22034335m	SUPERFAMILY	SSF81321	NA	301	557	7.51e-05	NA	NA	NA
B	4	O_bimaculoides	A0A0L8GFV5_A0A0L8GFV5_OCTBM	Ocbimv22034335m	PANTHER	PTHR12011	NA	49	175	2.5e-64	NA	NA	NA
B	4	O_bimaculoides	A0A0L8GFV5_A0A0L8GFV5_OCTBM	Ocbimv22034335m	PANTHER	PTHR12011	NA	266	566	2.5e-64	NA	NA	NA
A	1	O_bimaculoides	A0A0L8I459_A0A0L8I459_OCTBM	Ocbimv22036037m	PRINTS	PR00237	Rhodopsin-like_GPCR_superfamily_signature	16	40	6.2e-16	IPR000276	G_protein-coupled_receptor,_rhodopsin-like	GO:0004930_GO:0007186_GO:0016021
A	1	O_bimaculoides	A0A0L8I459_A0A0L8I459_OCTBM	Ocbimv22036037m	PRINTS	PR00237	Rhodopsin-like_GPCR_superfamily_signature	262	288	6.2e-16	IPR000276	G_protein-coupled_receptor,_rhodopsin-like	GO:0004930_GO:0007186_GO:0016021
A	1	O_bimaculoides	A0A0L8I459_A0A0L8I459_OCTBM	Ocbimv22036037m	PRINTS	PR00237	Rhodopsin-like_GPCR_superfamily_signature	91	113	6.2e-16	IPR000276	G_protein-coupled_receptor,_rhodopsin-like	GO:0004930_GO:0007186_GO:0016021
A	1	O_bimaculoides	A0A0L8I459_A0A0L8I459_OCTBM	Ocbimv22036037m	Pfam	PF00001	7_transmembrane_receptor_(rhodopsin_family)	31	280	3.9e-25	IPR000276	G_protein-coupled_receptor,_rhodopsin-like	GO:0004930_GO:0007186_GO:0016021
A	1	O_bimaculoides	A0A0L8I459_A0A0L8I459_OCTBM	Ocbimv22036037m	CDD	cd00637	7tm_classA_rhodopsin-like	14	284	3.14e-25	NA	NA	NA
A	1	O_bimaculoides	A0A0L8I459_A0A0L8I459_OCTBM	Ocbimv22036037m	SUPERFAMILY	SSF81321	NA	10	301	1.1e-43	NA	NA	NA
A	1	O_bimaculoides	A0A0L8I459_A0A0L8I459_OCTBM	Ocbimv22036037m	PANTHER	PTHR44112	NA	12	302	5.6e-36	NA	NA	NA
A	1	O_bimaculoides	A0A0L8I459_A0A0L8I459_OCTBM	Ocbimv22036037m	Gene3D	G3DSA:1.20.1070.10	NA	3	302	1.5e-51	NA	NA	NA
A	1	O_bimaculoides	A0A0L8I459_A0A0L8I459_OCTBM	Ocbimv22036037m	PRINTS	PR00237	Rhodopsin-like_GPCR_superfamily_signature	48	69	6.2e-16	IPR000276	G_protein-coupled_receptor,_rhodopsin-like	GO:0004930_GO:0007186_GO:0016021
A	1	O_bimaculoides	A0A0L8I459_A0A0L8I459_OCTBM	Ocbimv22036037m	PANTHER	PTHR44112:SF5	NA	12	302	5.6e-36	NA	NA	NA
B	3	O_bimaculoides	A0A0L8GB41_A0A0L8GB41_OCTBM	Ocbimv22036511m	Gene3D	G3DSA:2.60.220.50	NA	217	394	1e-16	NA	NA	NA
B	3	O_bimaculoides	A0A0L8GB41_A0A0L8GB41_OCTBM	Ocbimv22036511m	Pfam	PF00002	7_transmembrane_receptor_(Secretin_family)	414	646	7.1e-27	IPR000832	GPCR,_family_2,_secretin-like	GO:0004930_GO:0007186_GO:0016021
B	3	O_bimaculoides	A0A0L8GB41_A0A0L8GB41_OCTBM	Ocbimv22036511m	SUPERFAMILY	SSF81321	NA	414	684	3.3e-09	NA	NA	NA
B	3	O_bimaculoides	A0A0L8GB41_A0A0L8GB41_OCTBM	Ocbimv22036511m	PRINTS	PR00249	Secretin-like_GPCR_superfamily_signature	481	504	7.3e-10	IPR000832	GPCR,_family_2,_secretin-like	GO:0004930_GO:0007186_GO:0016021
B	3	O_bimaculoides	A0A0L8GB41_A0A0L8GB41_OCTBM	Ocbimv22036511m	Gene3D	G3DSA:1.20.1070.10	NA	401	685	4.9e-57	NA	NA	NA
B	3	O_bimaculoides	A0A0L8GB41_A0A0L8GB41_OCTBM	Ocbimv22036511m	PRINTS	PR00249	Secretin-like_GPCR_superfamily_signature	632	653	7.3e-10	IPR000832	GPCR,_family_2,_secretin-like	GO:0004930_GO:0007186_GO:0016021
B	3	O_bimaculoides	A0A0L8GB41_A0A0L8GB41_OCTBM	Ocbimv22036511m	PANTHER	PTHR12011	NA	74	687	1.1e-72	NA	NA	NA
B	3	O_bimaculoides	A0A0L8GB41_A0A0L8GB41_OCTBM	Ocbimv22036511m	PRINTS	PR00249	Secretin-like_GPCR_superfamily_signature	518	543	7.3e-10	IPR000832	GPCR,_family_2,_secretin-like	GO:0004930_GO:0007186_GO:0016021
B	3	O_bimaculoides	A0A0L8GB41_A0A0L8GB41_OCTBM	Ocbimv22036511m	Pfam	PF01825	GPCR_proteolysis_site,_GPS,_motif	355	400	1.1e-08	IPR000203	GPS_motif	NA
B	3	O_bimaculoides	A0A0L8GB41_A0A0L8GB41_OCTBM	Ocbimv22036511m	PRINTS	PR00249	Secretin-like_GPCR_superfamily_signature	415	439	7.3e-10	IPR000832	GPCR,_family_2,_secretin-like	GO:0004930_GO:0007186_GO:0016021
B	3	O_bimaculoides	A0A0L8GB41_A0A0L8GB41_OCTBM	Ocbimv22036511m	CDD	cd15040	7tmB2_Adhesion	414	659	1.78e-68	NA	NA	NA
B	3	O_bimaculoides	A0A0L8GB41_A0A0L8GB41_OCTBM	Ocbimv22036511m	PRINTS	PR00249	Secretin-like_GPCR_superfamily_signature	561	586	7.3e-10	IPR000832	GPCR,_family_2,_secretin-like	GO:0004930_GO:0007186_GO:0016021
A	2	O_bimaculoides	A0A0L8GBC8_A0A0L8GBC8_OCTBM	Ocbimv22036540m	PRINTS	PR00237	Rhodopsin-like_GPCR_superfamily_signature	111	133	1.4e-13	IPR000276	G_protein-coupled_receptor,_rhodopsin-like	GO:0004930_GO:0007186_GO:0016021
A	2	O_bimaculoides	A0A0L8GBC8_A0A0L8GBC8_OCTBM	Ocbimv22036540m	PRINTS	PR00237	Rhodopsin-like_GPCR_superfamily_signature	356	382	1.4e-13	IPR000276	G_protein-coupled_receptor,_rhodopsin-like	GO:0004930_GO:0007186_GO:0016021
A	2	O_bimaculoides	A0A0L8GBC8_A0A0L8GBC8_OCTBM	Ocbimv22036540m	PRINTS	PR00237	Rhodopsin-like_GPCR_superfamily_signature	313	337	1.4e-13	IPR000276	G_protein-coupled_receptor,_rhodopsin-like	GO:0004930_GO:0007186_GO:0016021
A	2	O_bimaculoides	A0A0L8GBC8_A0A0L8GBC8_OCTBM	Ocbimv22036540m	SUPERFAMILY	SSF81321	NA	299	413	7.87e-39	NA	NA	NA
A	2	O_bimaculoides	A0A0L8GBC8_A0A0L8GBC8_OCTBM	Ocbimv22036540m	PRINTS	PR00237	Rhodopsin-like_GPCR_superfamily_signature	66	87	1.4e-13	IPR000276	G_protein-coupled_receptor,_rhodopsin-like	GO:0004930_GO:0007186_GO:0016021
A	2	O_bimaculoides	A0A0L8GBC8_A0A0L8GBC8_OCTBM	Ocbimv22036540m	SUPERFAMILY	SSF81321	NA	32	232	7.87e-39	NA	NA	NA
A	2	O_bimaculoides	A0A0L8GBC8_A0A0L8GBC8_OCTBM	Ocbimv22036540m	Gene3D	G3DSA:1.20.1070.10	NA	25	389	6.2e-45	NA	NA	NA
A	2	O_bimaculoides	A0A0L8GBC8_A0A0L8GBC8_OCTBM	Ocbimv22036540m	Pfam	PF00001	7_transmembrane_receptor_(rhodopsin_family)	49	374	6.4e-28	IPR000276	G_protein-coupled_receptor,_rhodopsin-like	GO:0004930_GO:0007186_GO:0016021
A	2	O_bimaculoides	A0A0L8GBC8_A0A0L8GBC8_OCTBM	Ocbimv22036540m	PRINTS	PR00237	Rhodopsin-like_GPCR_superfamily_signature	34	58	1.4e-13	IPR000276	G_protein-coupled_receptor,_rhodopsin-like	GO:0004930_GO:0007186_GO:0016021
A	2	O_bimaculoides	A0A0L8GBC8_A0A0L8GBC8_OCTBM	Ocbimv22036540m	CDD	cd00637	7tm_classA_rhodopsin-like	35	378	4.15e-22	NA	NA	NA
A	2	O_bimaculoides	A0A0L8GBC8_A0A0L8GBC8_OCTBM	Ocbimv22036540m	PANTHER	PTHR24241	NA	39	389	1.7e-38	NA	NA	NA
A	1	O_bimaculoides	A0A0L8G5R8_A0A0L8G5R8_OCTBM	Ocbimv22039826m	PANTHER	PTHR24243	NA	26	336	1.3e-42	NA	NA	NA
A	1	O_bimaculoides	A0A0L8G5R8_A0A0L8G5R8_OCTBM	Ocbimv22039826m	PRINTS	PR00237	Rhodopsin-like_GPCR_superfamily_signature	24	48	6e-19	IPR000276	G_protein-coupled_receptor,_rhodopsin-like	GO:0004930_GO:0007186_GO:0016021
A	1	O_bimaculoides	A0A0L8G5R8_A0A0L8G5R8_OCTBM	Ocbimv22039826m	SUPERFAMILY	SSF81321	NA	23	335	1.46e-47	NA	NA	NA
A	1	O_bimaculoides	A0A0L8G5R8_A0A0L8G5R8_OCTBM	Ocbimv22039826m	PRINTS	PR00237	Rhodopsin-like_GPCR_superfamily_signature	101	123	6e-19	IPR000276	G_protein-coupled_receptor,_rhodopsin-like	GO:0004930_GO:0007186_GO:0016021
A	1	O_bimaculoides	A0A0L8G5R8_A0A0L8G5R8_OCTBM	Ocbimv22039826m	Pfam	PF00001	7_transmembrane_receptor_(rhodopsin_family)	39	310	8.5e-33	IPR000276	G_protein-coupled_receptor,_rhodopsin-like	GO:0004930_GO:0007186_GO:0016021
A	1	O_bimaculoides	A0A0L8G5R8_A0A0L8G5R8_OCTBM	Ocbimv22039826m	CDD	cd00637	7tm_classA_rhodopsin-like	26	314	3.18e-39	NA	NA	NA
A	1	O_bimaculoides	A0A0L8G5R8_A0A0L8G5R8_OCTBM	Ocbimv22039826m	PRINTS	PR00237	Rhodopsin-like_GPCR_superfamily_signature	56	77	6e-19	IPR000276	G_protein-coupled_receptor,_rhodopsin-like	GO:0004930_GO:0007186_GO:0016021
A	1	O_bimaculoides	A0A0L8G5R8_A0A0L8G5R8_OCTBM	Ocbimv22039826m	Gene3D	G3DSA:1.20.1070.10	NA	7	352	3.2e-55	NA	NA	NA
A	1	O_bimaculoides	A0A0L8G5R8_A0A0L8G5R8_OCTBM	Ocbimv22039826m	PRINTS	PR00237	Rhodopsin-like_GPCR_superfamily_signature	292	318	6e-19	IPR000276	G_protein-coupled_receptor,_rhodopsin-like	GO:0004930_GO:0007186_GO:0016021
A	1	O_bimaculoides	A0A0L8G5R8_A0A0L8G5R8_OCTBM	Ocbimv22039826m	PRINTS	PR00237	Rhodopsin-like_GPCR_superfamily_signature	250	274	6e-19	IPR000276	G_protein-coupled_receptor,_rhodopsin-like	GO:0004930_GO:0007186_GO:0016021
B	3	O_bimaculoides	Omin000461p_OCMIN	Omin000461m	PANTHER	PTHR12011:SF264	NA	214	888	1.4e-80	NA	NA	NA
B	3	O_bimaculoides	Omin000461p_OCMIN	Omin000461m	Pfam	PF13855	Leucine_rich_repeat	43	101	5.5e-14	IPR001611	Leucine-rich_repeat	GO:0005328_GO:0006836_GO:0016021
B	3	O_bimaculoides	Omin000461p_OCMIN	Omin000461m	PANTHER	PTHR12011	NA	214	888	1.4e-80	NA	NA	NA
B	3	O_bimaculoides	Omin000461p_OCMIN	Omin000461m	Gene3D	G3DSA:2.60.220.50	NA	459	611	3.2e-18	NA	NA	NA
B	3	O_bimaculoides	Omin000461p_OCMIN	Omin000461m	SUPERFAMILY	SSF52058	NA	1	135	1.16e-28	NA	NA	NA
B	3	O_bimaculoides	Omin000461p_OCMIN	Omin000461m	Gene3D	G3DSA:3.80.10.10	NA	1	152	6.2e-30	IPR032675	Leucine-rich_repeat_domain_superfamily	NA
B	3	O_bimaculoides	Omin000461p_OCMIN	Omin000461m	SMART	SM00303	NA	571	623	1.8e-07	IPR000203	GPS_motif	NA
B	3	O_bimaculoides	Omin000461p_OCMIN	Omin000461m	CDD	cd15040	7tmB2_Adhesion	630	881	1.68e-69	NA	NA	NA
B	3	O_bimaculoides	Omin000461p_OCMIN	Omin000461m	Gene3D	G3DSA:1.20.1070.10	NA	619	909	1.2e-61	NA	NA	NA
B	3	O_bimaculoides	Omin000461p_OCMIN	Omin000461m	PRINTS	PR00249	Secretin-like_GPCR_superfamily_signature	701	724	2.7e-14	IPR000832	GPCR,_family_2,_secretin-like	NA
B	3	O_bimaculoides	Omin000461p_OCMIN	Omin000461m	PRINTS	PR00249	Secretin-like_GPCR_superfamily_signature	635	659	2.7e-14	IPR000832	GPCR,_family_2,_secretin-like	GO:0005515
B	3	O_bimaculoides	Omin000461p_OCMIN	Omin000461m	PRINTS	PR00249	Secretin-like_GPCR_superfamily_signature	854	875	2.7e-14	IPR000832	GPCR,_family_2,_secretin-like	NA
B	3	O_bimaculoides	Omin000461p_OCMIN	Omin000461m	Pfam	PF00002	7_transmembrane_receptor_(Secretin_family)	632	868	1.7e-33	IPR000832	GPCR,_family_2,_secretin-like	NA
B	3	O_bimaculoides	Omin000461p_OCMIN	Omin000461m	PRINTS	PR00249	Secretin-like_GPCR_superfamily_signature	783	808	2.7e-14	IPR000832	GPCR,_family_2,_secretin-like	NA
B	3	O_bimaculoides	Omin000461p_OCMIN	Omin000461m	SUPERFAMILY	SSF81321	NA	603	895	3.94e-09	NA	NA	NA
B	3	O_bimaculoides	Omin000461p_OCMIN	Omin000461m	Pfam	PF01825	GPCR_proteolysis_site,_GPS,_motif	574	617	1.8e-12	IPR000203	GPS_motif	NA
A	1	C_minor	Omin002218p_OCMIN	Omin002218m	PRINTS	PR00237	Rhodopsin-like_GPCR_superfamily_signature	316	339	4.6e-20	IPR000276	G_protein-coupled_receptor,_rhodopsin-like	GO:0003676
A	1	C_minor	Omin002218p_OCMIN	Omin002218m	PRINTS	PR00237	Rhodopsin-like_GPCR_superfamily_signature	376	400	4.6e-20	IPR000276	G_protein-coupled_receptor,_rhodopsin-like	NA
A	1	C_minor	Omin002218p_OCMIN	Omin002218m	PRINTS	PR00237	Rhodopsin-like_GPCR_superfamily_signature	183	204	4.6e-20	IPR000276	G_protein-coupled_receptor,_rhodopsin-like	NA
A	1	C_minor	Omin002218p_OCMIN	Omin002218m	Pfam	PF00001	7_transmembrane_receptor_(rhodopsin_family)	166	435	4.2e-28	IPR000276	G_protein-coupled_receptor,_rhodopsin-like	GO:0042256_GO:0043022
A	1	C_minor	Omin002218p_OCMIN	Omin002218m	PRINTS	PR00237	Rhodopsin-like_GPCR_superfamily_signature	228	250	4.6e-20	IPR000276	G_protein-coupled_receptor,_rhodopsin-like	NA
A	1	C_minor	Omin002218p_OCMIN	Omin002218m	CDD	cd00637	7tm_classA_rhodopsin-like	153	439	1.1e-31	NA	NA	NA
A	1	C_minor	Omin002218p_OCMIN	Omin002218m	PRINTS	PR00237	Rhodopsin-like_GPCR_superfamily_signature	151	175	4.6e-20	IPR000276	G_protein-coupled_receptor,_rhodopsin-like	NA
A	1	C_minor	Omin002218p_OCMIN	Omin002218m	PANTHER	PTHR24241	NA	148	445	1.8e-42	NA	NA	NA
A	1	C_minor	Omin002218p_OCMIN	Omin002218m	PRINTS	PR00237	Rhodopsin-like_GPCR_superfamily_signature	417	443	4.6e-20	IPR000276	G_protein-coupled_receptor,_rhodopsin-like	NA
A	1	C_minor	Omin002218p_OCMIN	Omin002218m	Gene3D	G3DSA:1.20.1070.10	NA	142	457	2.7e-51	NA	NA	NA
A	1	C_minor	Omin002218p_OCMIN	Omin002218m	SUPERFAMILY	SSF81321	NA	149	457	3.3e-44	NA	NA	NA
A	1	C_minor	Omin002374p_OCMIN	Omin002374m	Gene3D	G3DSA:1.20.1070.10	NA	1	340	1.1e-42	NA	NA	NA
A	1	C_minor	Omin002374p_OCMIN	Omin002374m	PRINTS	PR00237	Rhodopsin-like_GPCR_superfamily_signature	54	75	3.6e-18	IPR000276	G_protein-coupled_receptor,_rhodopsin-like	NA
A	1	C_minor	Omin002374p_OCMIN	Omin002374m	PRINTS	PR00237	Rhodopsin-like_GPCR_superfamily_signature	246	270	3.6e-18	IPR000276	G_protein-coupled_receptor,_rhodopsin-like	NA
A	1	C_minor	Omin002374p_OCMIN	Omin002374m	PRINTS	PR00237	Rhodopsin-like_GPCR_superfamily_signature	99	121	3.6e-18	IPR000276	G_protein-coupled_receptor,_rhodopsin-like	NA
A	1	C_minor	Omin002374p_OCMIN	Omin002374m	Pfam	PF00001	7_transmembrane_receptor_(rhodopsin_family)	38	305	2.6e-23	IPR000276	G_protein-coupled_receptor,_rhodopsin-like	NA
A	1	C_minor	Omin002374p_OCMIN	Omin002374m	PRINTS	PR00237	Rhodopsin-like_GPCR_superfamily_signature	287	313	3.6e-18	IPR000276	G_protein-coupled_receptor,_rhodopsin-like	NA
A	1	C_minor	Omin002374p_OCMIN	Omin002374m	PANTHER	PTHR24243	NA	21	327	1.8e-33	NA	NA	NA
A	1	C_minor	Omin002374p_OCMIN	Omin002374m	PRINTS	PR00237	Rhodopsin-like_GPCR_superfamily_signature	22	46	3.6e-18	IPR000276	G_protein-coupled_receptor,_rhodopsin-like	NA
A	1	C_minor	Omin002374p_OCMIN	Omin002374m	SUPERFAMILY	SSF81321	NA	20	331	2.65e-42	NA	NA	GO:0005515
A	1	C_minor	Omin002374p_OCMIN	Omin002374m	CDD	cd00637	7tm_classA_rhodopsin-like	25	309	1.36e-25	NA	NA	NA
A	1	C_minor	Omin002374p_OCMIN	Omin002374m	PRINTS	PR00237	Rhodopsin-like_GPCR_superfamily_signature	186	209	3.6e-18	IPR000276	G_protein-coupled_receptor,_rhodopsin-like	NA
A	1	C_minor	Omin002374p_OCMIN	Omin002374m	PANTHER	PTHR24243:SF148	NA	21	327	1.8e-33	NA	NA	NA
A	1	C_minor	Omin002376p_OCMIN	Omin002376m	PANTHER	PTHR43919:SF3	NA	23	332	1.6e-37	NA	NA	NA
A	1	C_minor	Omin002376p_OCMIN	Omin002376m	PRINTS	PR00237	Rhodopsin-like_GPCR_superfamily_signature	100	122	1.5e-17	IPR000276	G_protein-coupled_receptor,_rhodopsin-like	NA
A	1	C_minor	Omin002376p_OCMIN	Omin002376m	PRINTS	PR00237	Rhodopsin-like_GPCR_superfamily_signature	55	76	1.5e-17	IPR000276	G_protein-coupled_receptor,_rhodopsin-like	NA
A	1	C_minor	Omin002376p_OCMIN	Omin002376m	PRINTS	PR00237	Rhodopsin-like_GPCR_superfamily_signature	280	306	1.5e-17	IPR000276	G_protein-coupled_receptor,_rhodopsin-like	NA
A	1	C_minor	Omin002376p_OCMIN	Omin002376m	CDD	cd00637	7tm_classA_rhodopsin-like	25	302	3.07e-35	NA	NA	GO:0005515
A	1	C_minor	Omin002376p_OCMIN	Omin002376m	PRINTS	PR00237	Rhodopsin-like_GPCR_superfamily_signature	134	155	1.5e-17	IPR000276	G_protein-coupled_receptor,_rhodopsin-like	NA
A	1	C_minor	Omin002376p_OCMIN	Omin002376m	PANTHER	PTHR43919	NA	23	332	1.6e-37	NA	NA	GO:0000774_GO:0006457_GO:0042803_GO:0051087
A	1	C_minor	Omin002376p_OCMIN	Omin002376m	PRINTS	PR00237	Rhodopsin-like_GPCR_superfamily_signature	23	47	1.5e-17	IPR000276	G_protein-coupled_receptor,_rhodopsin-like	NA
A	1	C_minor	Omin002376p_OCMIN	Omin002376m	SUPERFAMILY	SSF81321	NA	22	328	1.46e-44	NA	NA	GO:0003676
A	1	C_minor	Omin002376p_OCMIN	Omin002376m	Gene3D	G3DSA:1.20.1070.10	NA	1	335	3.2e-50	NA	NA	NA
A	1	C_minor	Omin002376p_OCMIN	Omin002376m	Pfam	PF00001	7_transmembrane_receptor_(rhodopsin_family)	38	298	2.1e-26	IPR000276	G_protein-coupled_receptor,_rhodopsin-like	NA
A	1	C_minor	Omin002376p_OCMIN	Omin002376m	PRINTS	PR00237	Rhodopsin-like_GPCR_superfamily_signature	239	263	1.5e-17	IPR000276	G_protein-coupled_receptor,_rhodopsin-like	NA
A	1	C_minor	Omin002377p_OCMIN	Omin002377m	PRINTS	PR00237	Rhodopsin-like_GPCR_superfamily_signature	247	271	2.2e-19	IPR000276	G_protein-coupled_receptor,_rhodopsin-like	NA
A	1	C_minor	Omin002377p_OCMIN	Omin002377m	PANTHER	PTHR24241	NA	24	321	6e-35	NA	NA	NA
A	1	C_minor	Omin002377p_OCMIN	Omin002377m	PRINTS	PR00237	Rhodopsin-like_GPCR_superfamily_signature	133	154	2.2e-19	IPR000276	G_protein-coupled_receptor,_rhodopsin-like	NA
A	1	C_minor	Omin002377p_OCMIN	Omin002377m	Pfam	PF00001	7_transmembrane_receptor_(rhodopsin_family)	38	306	5.4e-25	IPR000276	G_protein-coupled_receptor,_rhodopsin-like	NA
A	1	C_minor	Omin002377p_OCMIN	Omin002377m	PRINTS	PR00237	Rhodopsin-like_GPCR_superfamily_signature	288	314	2.2e-19	IPR000276	G_protein-coupled_receptor,_rhodopsin-like	GO:0005515
A	1	C_minor	Omin002377p_OCMIN	Omin002377m	PRINTS	PR00237	Rhodopsin-like_GPCR_superfamily_signature	54	75	2.2e-19	IPR000276	G_protein-coupled_receptor,_rhodopsin-like	GO:0005515
A	1	C_minor	Omin002377p_OCMIN	Omin002377m	PRINTS	PR00237	Rhodopsin-like_GPCR_superfamily_signature	99	121	2.2e-19	IPR000276	G_protein-coupled_receptor,_rhodopsin-like	GO:0005794
A	1	C_minor	Omin002377p_OCMIN	Omin002377m	PRINTS	PR00237	Rhodopsin-like_GPCR_superfamily_signature	186	209	2.2e-19	IPR000276	G_protein-coupled_receptor,_rhodopsin-like	GO:0005515
A	1	C_minor	Omin002377p_OCMIN	Omin002377m	SUPERFAMILY	SSF81321	NA	21	323	3.39e-40	NA	NA	NA
A	1	C_minor	Omin002377p_OCMIN	Omin002377m	PRINTS	PR00237	Rhodopsin-like_GPCR_superfamily_signature	22	46	2.2e-19	IPR000276	G_protein-coupled_receptor,_rhodopsin-like	GO:0005515
A	1	C_minor	Omin002377p_OCMIN	Omin002377m	Gene3D	G3DSA:1.20.1070.10	NA	14	324	3.6e-45	NA	NA	NA
A	1	C_minor	Omin002380p_OCMIN	Omin002380m	Pfam	PF00001	7_transmembrane_receptor_(rhodopsin_family)	293	560	4.7e-23	IPR000276	G_protein-coupled_receptor,_rhodopsin-like	NA
A	1	C_minor	Omin002380p_OCMIN	Omin002380m	PANTHER	PTHR24243	NA	18	172	8.8e-55	NA	NA	NA
A	1	C_minor	Omin002380p_OCMIN	Omin002380m	SUPERFAMILY	SSF81321	NA	20	265	2.47e-24	NA	NA	NA
A	1	C_minor	Omin002380p_OCMIN	Omin002380m	CDD	cd00637	7tm_classA_rhodopsin-like	21	261	1.24e-13	NA	NA	NA
A	1	C_minor	Omin002380p_OCMIN	Omin002380m	PANTHER	PTHR24243:SF148	NA	277	582	8.8e-55	NA	NA	GO:0005488
A	1	C_minor	Omin002380p_OCMIN	Omin002380m	Gene3D	G3DSA:1.20.1070.10	NA	171	273	1.2e-09	NA	NA	GO:0005509_GO:0007156_GO:0016020
A	1	C_minor	Omin002380p_OCMIN	Omin002380m	PRINTS	PR00237	Rhodopsin-like_GPCR_superfamily_signature	542	568	8.7e-17	IPR000276	G_protein-coupled_receptor,_rhodopsin-like	NA
A	1	C_minor	Omin002380p_OCMIN	Omin002380m	PRINTS	PR00237	Rhodopsin-like_GPCR_superfamily_signature	441	464	8.7e-17	IPR000276	G_protein-coupled_receptor,_rhodopsin-like	NA
A	1	C_minor	Omin002380p_OCMIN	Omin002380m	PRINTS	PR00237	Rhodopsin-like_GPCR_superfamily_signature	309	330	8.7e-17	IPR000276	G_protein-coupled_receptor,_rhodopsin-like	GO:0046983
A	1	C_minor	Omin002380p_OCMIN	Omin002380m	PANTHER	PTHR24243	NA	277	582	8.8e-55	NA	NA	NA
A	1	C_minor	Omin002380p_OCMIN	Omin002380m	Pfam	PF00001	7_transmembrane_receptor_(rhodopsin_family)	35	148	7.9e-10	IPR000276	G_protein-coupled_receptor,_rhodopsin-like	NA
A	1	C_minor	Omin002380p_OCMIN	Omin002380m	SUPERFAMILY	SSF81321	NA	277	586	7.69e-41	NA	NA	GO:0000786_GO:0003677
A	1	C_minor	Omin002380p_OCMIN	Omin002380m	PANTHER	PTHR24243:SF148	NA	18	172	8.8e-55	NA	NA	GO:0005488
A	1	C_minor	Omin002380p_OCMIN	Omin002380m	Gene3D	G3DSA:1.20.1070.10	NA	274	589	5.9e-42	NA	NA	NA
A	1	C_minor	Omin002380p_OCMIN	Omin002380m	PRINTS	PR00237	Rhodopsin-like_GPCR_superfamily_signature	501	525	8.7e-17	IPR000276	G_protein-coupled_receptor,_rhodopsin-like	NA
A	1	C_minor	Omin002380p_OCMIN	Omin002380m	PANTHER	PTHR24243	NA	191	265	8.8e-55	NA	NA	GO:0005515
A	1	C_minor	Omin002380p_OCMIN	Omin002380m	PRINTS	PR00237	Rhodopsin-like_GPCR_superfamily_signature	277	301	8.7e-17	IPR000276	G_protein-coupled_receptor,_rhodopsin-like	NA
A	1	C_minor	Omin002380p_OCMIN	Omin002380m	Gene3D	G3DSA:1.20.1070.10	NA	2	170	2.2e-17	NA	NA	GO:0005783_GO:0016021
A	1	C_minor	Omin002380p_OCMIN	Omin002380m	CDD	cd00637	7tm_classA_rhodopsin-like	280	564	2.37e-25	NA	NA	NA
A	1	C_minor	Omin002380p_OCMIN	Omin002380m	PRINTS	PR00237	Rhodopsin-like_GPCR_superfamily_signature	354	376	8.7e-17	IPR000276	G_protein-coupled_receptor,_rhodopsin-like	NA
A	1	C_minor	Omin002380p_OCMIN	Omin002380m	PANTHER	PTHR24243:SF148	NA	191	265	8.8e-55	NA	NA	NA
A	2	C_minor	Omin006236p_OCMIN	Omin006236m	Gene3D	G3DSA:1.20.1070.10	NA	1	148	6.7e-10	NA	NA	GO:0005515
A	2	C_minor	Omin006236p_OCMIN	Omin006236m	Gene3D	G3DSA:1.20.1070.10	NA	508	830	5.7e-29	NA	NA	NA
A	2	C_minor	Omin006236p_OCMIN	Omin006236m	PANTHER	PTHR24241	NA	513	830	6.1e-55	NA	NA	NA
A	2	C_minor	Omin006236p_OCMIN	Omin006236m	SUPERFAMILY	SSF81321	NA	755	829	2.65e-23	NA	NA	NA
A	2	C_minor	Omin006236p_OCMIN	Omin006236m	SUPERFAMILY	SSF81321	NA	3	22	1.83e-07	NA	NA	NA
A	2	C_minor	Omin006236p_OCMIN	Omin006236m	Pfam	PF00001	7_transmembrane_receptor_(rhodopsin_family)	528	820	6.6e-14	IPR000276	G_protein-coupled_receptor,_rhodopsin-like	GO:0005509_GO:0016020
A	2	C_minor	Omin006236p_OCMIN	Omin006236m	SUPERFAMILY	SSF81321	NA	168	382	2.65e-29	NA	NA	GO:0005200_GO:0005525_GO:0005874_GO:0007017
A	2	C_minor	Omin006236p_OCMIN	Omin006236m	CDD	cd00637	7tm_classA_rhodopsin-like	514	824	7.09e-19	NA	NA	GO:0006260_GO:0055114
A	2	C_minor	Omin006236p_OCMIN	Omin006236m	SUPERFAMILY	SSF81321	NA	510	711	2.65e-23	NA	NA	NA
A	2	C_minor	Omin006236p_OCMIN	Omin006236m	PANTHER	PTHR24241	NA	187	507	6.1e-55	NA	NA	NA
A	2	C_minor	Omin006236p_OCMIN	Omin006236m	PRINTS	PR00237	Rhodopsin-like_GPCR_superfamily_signature	677	700	1.2e-09	IPR000276	G_protein-coupled_receptor,_rhodopsin-like	GO:0005509_GO:0007156_GO:0016020
A	2	C_minor	Omin006236p_OCMIN	Omin006236m	SUPERFAMILY	SSF81321	NA	60	146	1.83e-07	NA	NA	GO:0003676
A	2	C_minor	Omin006236p_OCMIN	Omin006236m	PRINTS	PR00237	Rhodopsin-like_GPCR_superfamily_signature	759	783	1.2e-09	IPR000276	G_protein-coupled_receptor,_rhodopsin-like	GO:0005509_GO:0007156_GO:0016020
A	2	C_minor	Omin006236p_OCMIN	Omin006236m	Gene3D	G3DSA:1.20.1070.10	NA	169	507	4.4e-34	NA	NA	NA
A	2	C_minor	Omin006236p_OCMIN	Omin006236m	Pfam	PF00001	7_transmembrane_receptor_(rhodopsin_family)	201	495	6.5e-19	IPR000276	G_protein-coupled_receptor,_rhodopsin-like	NA
A	2	C_minor	Omin006236p_OCMIN	Omin006236m	PRINTS	PR00237	Rhodopsin-like_GPCR_superfamily_signature	802	828	1.2e-09	IPR000276	G_protein-coupled_receptor,_rhodopsin-like	GO:0005509_GO:0016020
A	2	C_minor	Omin006236p_OCMIN	Omin006236m	PRINTS	PR00237	Rhodopsin-like_GPCR_superfamily_signature	590	612	1.2e-09	IPR000276	G_protein-coupled_receptor,_rhodopsin-like	GO:0005509_GO:0007156_GO:0016020
A	2	C_minor	Omin006236p_OCMIN	Omin006236m	CDD	cd00637	7tm_classA_rhodopsin-like	187	382	1.14e-15	NA	NA	NA
A	2	C_minor	Omin006236p_OCMIN	Omin006236m	SUPERFAMILY	SSF81321	NA	420	506	2.65e-29	NA	NA	GO:0005200_GO:0005525_GO:0005874_GO:0007017
A	2	C_minor	Omin006236p_OCMIN	Omin006236m	PRINTS	PR00237	Rhodopsin-like_GPCR_superfamily_signature	513	537	1.2e-09	IPR000276	G_protein-coupled_receptor,_rhodopsin-like	GO:0005509_GO:0007156_GO:0016020
A	2	C_minor	Omin006237p_OCMIN	Omin006237m	Pfam	PF00001	7_transmembrane_receptor_(rhodopsin_family)	73	352	2.9e-19	IPR000276	G_protein-coupled_receptor,_rhodopsin-like	GO:0005509_GO:0007156_GO:0016020
A	2	C_minor	Omin006237p_OCMIN	Omin006237m	CDD	cd00637	7tm_classA_rhodopsin-like	381	545	5.95e-12	NA	NA	GO:0003735_GO:0005763
A	2	C_minor	Omin006237p_OCMIN	Omin006237m	SUPERFAMILY	SSF81321	NA	71	241	3.2e-21	NA	NA	GO:0005515
A	2	C_minor	Omin006237p_OCMIN	Omin006237m	Pfam	PF00001	7_transmembrane_receptor_(rhodopsin_family)	395	541	2.1e-13	IPR000276	G_protein-coupled_receptor,_rhodopsin-like	NA
A	2	C_minor	Omin006237p_OCMIN	Omin006237m	SUPERFAMILY	SSF81321	NA	378	540	1.1e-16	NA	NA	GO:0016702_GO:0046872_GO:0055114
A	2	C_minor	Omin006237p_OCMIN	Omin006237m	PANTHER	PTHR24241	NA	74	354	2.2e-37	NA	NA	NA
A	2	C_minor	Omin006237p_OCMIN	Omin006237m	PANTHER	PTHR24241:SF76	NA	379	531	2.2e-37	NA	NA	NA
A	2	C_minor	Omin006237p_OCMIN	Omin006237m	PANTHER	PTHR24241:SF76	NA	74	354	2.2e-37	NA	NA	NA
A	2	C_minor	Omin006237p_OCMIN	Omin006237m	Gene3D	G3DSA:1.20.1070.10	NA	71	358	6.1e-29	NA	NA	NA
A	2	C_minor	Omin006237p_OCMIN	Omin006237m	CDD	cd00637	7tm_classA_rhodopsin-like	74	356	1.9e-16	NA	NA	NA
A	2	C_minor	Omin006237p_OCMIN	Omin006237m	PANTHER	PTHR24241	NA	379	531	2.2e-37	NA	NA	GO:0009055_GO:0015035_GO:0045454
A	2	C_minor	Omin006237p_OCMIN	Omin006237m	SUPERFAMILY	SSF81321	NA	275	356	3.2e-21	NA	NA	NA
A	2	C_minor	Omin006237p_OCMIN	Omin006237m	Gene3D	G3DSA:1.20.1070.10	NA	359	549	2.4e-20	NA	NA	NA
A	1	C_minor	Omin006947p_OCMIN	Omin006947m	Gene3D	G3DSA:1.20.1070.10	NA	332	613	3.7e-41	NA	NA	NA
A	1	C_minor	Omin006947p_OCMIN	Omin006947m	PRINTS	PR00237	Rhodopsin-like_GPCR_superfamily_signature	68	89	7.4e-12	IPR000276	G_protein-coupled_receptor,_rhodopsin-like	NA
A	1	C_minor	Omin006947p_OCMIN	Omin006947m	SUPERFAMILY	SSF81321	NA	16	317	2.84e-35	NA	NA	GO:0006355_GO:0008270
A	1	C_minor	Omin006947p_OCMIN	Omin006947m	Gene3D	G3DSA:1.20.1070.10	NA	11	321	4.9e-45	NA	NA	GO:0005515
A	1	C_minor	Omin006947p_OCMIN	Omin006947m	PRINTS	PR00237	Rhodopsin-like_GPCR_superfamily_signature	281	307	7.4e-12	IPR000276	G_protein-coupled_receptor,_rhodopsin-like	GO:0007268_GO:0030036_GO:0035556
A	1	C_minor	Omin006947p_OCMIN	Omin006947m	SUPERFAMILY	SSF81321	NA	334	611	2.01e-34	NA	NA	NA
A	1	C_minor	Omin006947p_OCMIN	Omin006947m	PANTHER	PTHR43916	NA	15	318	6.3e-60	NA	NA	NA
A	1	C_minor	Omin006947p_OCMIN	Omin006947m	Pfam	PF00001	7_transmembrane_receptor_(rhodopsin_family)	355	594	1.9e-17	IPR000276	G_protein-coupled_receptor,_rhodopsin-like	GO:0005488
A	1	C_minor	Omin006947p_OCMIN	Omin006947m	PANTHER	PTHR43916	NA	328	614	6.3e-60	NA	NA	NA
A	1	C_minor	Omin006947p_OCMIN	Omin006947m	PRINTS	PR00237	Rhodopsin-like_GPCR_superfamily_signature	18	42	7.4e-12	IPR000276	G_protein-coupled_receptor,_rhodopsin-like	GO:0005515
A	1	C_minor	Omin006947p_OCMIN	Omin006947m	Pfam	PF00001	7_transmembrane_receptor_(rhodopsin_family)	66	299	1.7e-21	IPR000276	G_protein-coupled_receptor,_rhodopsin-like	GO:0006486_GO:0008378_GO:0016020
A	1	C_minor	Omin006947p_OCMIN	Omin006947m	PRINTS	PR00237	Rhodopsin-like_GPCR_superfamily_signature	111	133	7.4e-12	IPR000276	G_protein-coupled_receptor,_rhodopsin-like	NA
B	4	O_bimaculoides	Omin007145p_OCMIN	Omin007145m	PRINTS	PR00249	Secretin-like_GPCR_superfamily_signature	441	465	1.8e-08	IPR000832	GPCR,_family_2,_secretin-like	NA
B	4	O_bimaculoides	Omin007145p_OCMIN	Omin007145m	PANTHER	PTHR12011	NA	98	395	3.6e-76	NA	NA	GO:0005509_GO:0016020
B	4	O_bimaculoides	Omin007145p_OCMIN	Omin007145m	Gene3D	G3DSA:1.20.1070.10	NA	429	721	3.4e-59	NA	NA	GO:0003676
B	4	O_bimaculoides	Omin007145p_OCMIN	Omin007145m	Pfam	PF00002	7_transmembrane_receptor_(Secretin_family)	439	682	1.2e-27	IPR000832	GPCR,_family_2,_secretin-like	NA
B	4	O_bimaculoides	Omin007145p_OCMIN	Omin007145m	PRINTS	PR00249	Secretin-like_GPCR_superfamily_signature	596	621	1.8e-08	IPR000832	GPCR,_family_2,_secretin-like	NA
B	4	O_bimaculoides	Omin007145p_OCMIN	Omin007145m	PANTHER	PTHR12011:SF432	NA	433	700	3.6e-76	NA	NA	GO:0005509_GO:0016020
B	4	O_bimaculoides	Omin007145p_OCMIN	Omin007145m	SUPERFAMILY	SSF81321	NA	432	708	1.01e-06	NA	NA	NA
B	4	O_bimaculoides	Omin007145p_OCMIN	Omin007145m	PANTHER	PTHR12011	NA	433	700	3.6e-76	NA	NA	NA
B	4	O_bimaculoides	Omin007145p_OCMIN	Omin007145m	PANTHER	PTHR12011	NA	1	48	3.6e-76	NA	NA	NA
B	4	O_bimaculoides	Omin007145p_OCMIN	Omin007145m	PRINTS	PR00249	Secretin-like_GPCR_superfamily_signature	503	526	1.8e-08	IPR000832	GPCR,_family_2,_secretin-like	NA
B	4	O_bimaculoides	Omin007145p_OCMIN	Omin007145m	PANTHER	PTHR12011:SF432	NA	98	395	3.6e-76	NA	NA	NA
B	4	O_bimaculoides	Omin007145p_OCMIN	Omin007145m	CDD	cd15039	7tmB3_Methuselah-like	436	694	4.43e-67	NA	NA	NA
B	4	O_bimaculoides	Omin007145p_OCMIN	Omin007145m	PANTHER	PTHR12011:SF432	NA	1	48	3.6e-76	NA	NA	NA
B	4	O_bimaculoides	Omin007145p_OCMIN	Omin007145m	PRINTS	PR00249	Secretin-like_GPCR_superfamily_signature	668	689	1.8e-08	IPR000832	GPCR,_family_2,_secretin-like	NA
B	4	O_bimaculoides	Omin007146p_OCMIN	Omin007146m	Pfam	PF00002	7_transmembrane_receptor_(Secretin_family)	365	603	1.4e-15	IPR000832	GPCR,_family_2,_secretin-like	GO:0016021
B	4	O_bimaculoides	Omin007146p_OCMIN	Omin007146m	Gene3D	G3DSA:1.20.1070.10	NA	356	615	6e-36	NA	NA	GO:0005515
B	4	O_bimaculoides	Omin007146p_OCMIN	Omin007146m	PANTHER	PTHR12011	NA	365	573	1.2e-34	NA	NA	NA
B	4	O_bimaculoides	Omin007146p_OCMIN	Omin007146m	CDD	cd15039	7tmB3_Methuselah-like	368	573	3.48e-43	NA	NA	NA
B	4	O_bimaculoides	Omin007146p_OCMIN	Omin007146m	PANTHER	PTHR12011:SF432	NA	365	573	1.2e-34	NA	NA	GO:0003824
A	1	C_minor	Omin009324p_OCMIN	Omin009324m	PRINTS	PR00237	Rhodopsin-like_GPCR_superfamily_signature	32	56	7.5e-20	IPR000276	G_protein-coupled_receptor,_rhodopsin-like	NA
A	1	C_minor	Omin009324p_OCMIN	Omin009324m	PRINTS	PR00237	Rhodopsin-like_GPCR_superfamily_signature	248	272	7.5e-20	IPR000276	G_protein-coupled_receptor,_rhodopsin-like	NA
A	1	C_minor	Omin009324p_OCMIN	Omin009324m	PRINTS	PR00237	Rhodopsin-like_GPCR_superfamily_signature	288	314	7.5e-20	IPR000276	G_protein-coupled_receptor,_rhodopsin-like	NA
A	1	C_minor	Omin009324p_OCMIN	Omin009324m	PANTHER	PTHR43962	NA	32	338	9.7e-36	IPR027459	Melatonin_receptor_1	NA
A	1	C_minor	Omin009324p_OCMIN	Omin009324m	PANTHER	PTHR43962:SF6	NA	32	338	9.7e-36	NA	NA	GO:0003676
A	1	C_minor	Omin009324p_OCMIN	Omin009324m	CDD	cd00637	7tm_classA_rhodopsin-like	34	310	4.49e-33	NA	NA	NA
A	1	C_minor	Omin009324p_OCMIN	Omin009324m	PRINTS	PR00237	Rhodopsin-like_GPCR_superfamily_signature	64	85	7.5e-20	IPR000276	G_protein-coupled_receptor,_rhodopsin-like	NA
A	1	C_minor	Omin009324p_OCMIN	Omin009324m	Gene3D	G3DSA:1.20.1070.10	NA	21	330	1.1e-47	NA	NA	NA
A	1	C_minor	Omin009324p_OCMIN	Omin009324m	PRINTS	PR00237	Rhodopsin-like_GPCR_superfamily_signature	109	131	7.5e-20	IPR000276	G_protein-coupled_receptor,_rhodopsin-like	NA
A	1	C_minor	Omin009324p_OCMIN	Omin009324m	Pfam	PF00001	7_transmembrane_receptor_(rhodopsin_family)	47	306	4.4e-25	IPR000276	G_protein-coupled_receptor,_rhodopsin-like	NA
A	1	C_minor	Omin009324p_OCMIN	Omin009324m	SUPERFAMILY	SSF81321	NA	32	332	2.56e-44	NA	NA	NA
A	1	C_minor	Omin009421p_OCMIN	Omin009421m	PANTHER	PTHR24241	NA	1	301	6.2e-39	NA	NA	NA
A	1	C_minor	Omin009421p_OCMIN	Omin009421m	Gene3D	G3DSA:1.20.1070.10	NA	1	311	8.2e-48	NA	NA	NA
A	1	C_minor	Omin009421p_OCMIN	Omin009421m	CDD	cd00637	7tm_classA_rhodopsin-like	1	289	2.11e-31	NA	NA	GO:0003676
A	1	C_minor	Omin009421p_OCMIN	Omin009421m	Pfam	PF00001	7_transmembrane_receptor_(rhodopsin_family)	7	285	8.6e-27	IPR000276	G_protein-coupled_receptor,_rhodopsin-like	NA
A	1	C_minor	Omin009421p_OCMIN	Omin009421m	PRINTS	PR00237	Rhodopsin-like_GPCR_superfamily_signature	69	91	3.2e-11	IPR000276	G_protein-coupled_receptor,_rhodopsin-like	GO:0005515_GO:0007165
A	1	C_minor	Omin009421p_OCMIN	Omin009421m	PRINTS	PR00237	Rhodopsin-like_GPCR_superfamily_signature	24	45	3.2e-11	IPR000276	G_protein-coupled_receptor,_rhodopsin-like	GO:0005515_GO:0007165
A	1	C_minor	Omin009421p_OCMIN	Omin009421m	PRINTS	PR00237	Rhodopsin-like_GPCR_superfamily_signature	225	249	3.2e-11	IPR000276	G_protein-coupled_receptor,_rhodopsin-like	NA
A	1	C_minor	Omin009421p_OCMIN	Omin009421m	SUPERFAMILY	SSF81321	NA	2	321	2.47e-43	NA	NA	NA
A	1	C_minor	Omin009421p_OCMIN	Omin009421m	PRINTS	PR00237	Rhodopsin-like_GPCR_superfamily_signature	267	293	3.2e-11	IPR000276	G_protein-coupled_receptor,_rhodopsin-like	GO:0005515
B	4	O_bimaculoides	Omin011707p_OCMIN	Omin011707m	PANTHER	PTHR12011:SF432	NA	226	612	2.3e-70	NA	NA	NA
B	4	O_bimaculoides	Omin011707p_OCMIN	Omin011707m	Gene3D	G3DSA:1.20.1070.10	NA	343	623	9.4e-62	NA	NA	NA
B	4	O_bimaculoides	Omin011707p_OCMIN	Omin011707m	PANTHER	PTHR12011	NA	226	612	2.3e-70	NA	NA	NA
B	4	O_bimaculoides	Omin011707p_OCMIN	Omin011707m	CDD	cd15039	7tmB3_Methuselah-like	355	615	1.83e-88	NA	NA	NA
B	4	O_bimaculoides	Omin011707p_OCMIN	Omin011707m	PRINTS	PR00249	Secretin-like_GPCR_superfamily_signature	358	382	1.5e-06	IPR000832	GPCR,_family_2,_secretin-like	GO:0003676
B	4	O_bimaculoides	Omin011707p_OCMIN	Omin011707m	SUPERFAMILY	SSF81321	NA	349	619	3.11e-07	NA	NA	GO:0003676
B	4	O_bimaculoides	Omin011707p_OCMIN	Omin011707m	PRINTS	PR00249	Secretin-like_GPCR_superfamily_signature	513	538	1.5e-06	IPR000832	GPCR,_family_2,_secretin-like	GO:0003676
B	4	O_bimaculoides	Omin011707p_OCMIN	Omin011707m	PRINTS	PR00249	Secretin-like_GPCR_superfamily_signature	421	444	1.5e-06	IPR000832	GPCR,_family_2,_secretin-like	GO:0003676
B	4	O_bimaculoides	Omin011707p_OCMIN	Omin011707m	PRINTS	PR00249	Secretin-like_GPCR_superfamily_signature	585	606	1.5e-06	IPR000832	GPCR,_family_2,_secretin-like	NA
B	4	O_bimaculoides	Omin011707p_OCMIN	Omin011707m	Pfam	PF00002	7_transmembrane_receptor_(Secretin_family)	358	599	3.1e-29	IPR000832	GPCR,_family_2,_secretin-like	NA
B	4	O_bimaculoides	Omin011708p_OCMIN	Omin011708m	Pfam	PF00002	7_transmembrane_receptor_(Secretin_family)	895	1132	1.2e-27	IPR000832	GPCR,_family_2,_secretin-like	NA
B	4	O_bimaculoides	Omin011708p_OCMIN	Omin011708m	Gene3D	G3DSA:1.20.1070.10	NA	880	1151	1.4e-55	NA	NA	NA
B	4	O_bimaculoides	Omin011708p_OCMIN	Omin011708m	CDD	cd15039	7tmB3_Methuselah-like	297	551	2.02e-82	NA	NA	GO:0003676
B	4	O_bimaculoides	Omin011708p_OCMIN	Omin011708m	PANTHER	PTHR12011:SF432	NA	764	1137	2e-126	NA	NA	GO:0005488
B	4	O_bimaculoides	Omin011708p_OCMIN	Omin011708m	CDD	cd15039	7tmB3_Methuselah-like	890	1136	1.69e-80	NA	NA	NA
B	4	O_bimaculoides	Omin011708p_OCMIN	Omin011708m	PANTHER	PTHR12011:SF432	NA	260	552	2e-126	NA	NA	GO:0005488
B	4	O_bimaculoides	Omin011708p_OCMIN	Omin011708m	Gene3D	G3DSA:1.20.1070.10	NA	287	564	1.3e-58	NA	NA	GO:0003676
B	4	O_bimaculoides	Omin011708p_OCMIN	Omin011708m	PANTHER	PTHR12011	NA	260	552	2e-126	NA	NA	NA
B	4	O_bimaculoides	Omin011708p_OCMIN	Omin011708m	Pfam	PF00002	7_transmembrane_receptor_(Secretin_family)	302	539	1.4e-27	IPR000832	GPCR,_family_2,_secretin-like	NA
B	4	O_bimaculoides	Omin011708p_OCMIN	Omin011708m	PANTHER	PTHR12011	NA	764	1137	2e-126	NA	NA	NA
B	4	O_bimaculoides	Omin011709p_OCMIN	Omin011709m	PRINTS	PR00249	Secretin-like_GPCR_superfamily_signature	294	318	2.4e-06	IPR000832	GPCR,_family_2,_secretin-like	NA
B	4	O_bimaculoides	Omin011709p_OCMIN	Omin011709m	Pfam	PF00002	7_transmembrane_receptor_(Secretin_family)	294	531	3.4e-28	IPR000832	GPCR,_family_2,_secretin-like	NA
B	4	O_bimaculoides	Omin011709p_OCMIN	Omin011709m	PANTHER	PTHR12011	NA	164	540	4.8e-64	NA	NA	NA
B	4	O_bimaculoides	Omin011709p_OCMIN	Omin011709m	CDD	cd15039	7tmB3_Methuselah-like	289	545	2.32e-84	NA	NA	NA
B	4	O_bimaculoides	Omin011709p_OCMIN	Omin011709m	PRINTS	PR00249	Secretin-like_GPCR_superfamily_signature	517	538	2.4e-06	IPR000832	GPCR,_family_2,_secretin-like	NA
B	4	O_bimaculoides	Omin011709p_OCMIN	Omin011709m	PRINTS	PR00249	Secretin-like_GPCR_superfamily_signature	449	474	2.4e-06	IPR000832	GPCR,_family_2,_secretin-like	NA
B	4	O_bimaculoides	Omin011709p_OCMIN	Omin011709m	PANTHER	PTHR12011:SF432	NA	164	540	4.8e-64	NA	NA	NA
B	4	O_bimaculoides	Omin011709p_OCMIN	Omin011709m	Gene3D	G3DSA:1.20.1070.10	NA	279	548	4.7e-57	NA	NA	NA
B	4	O_bimaculoides	Omin011709p_OCMIN	Omin011709m	PRINTS	PR00249	Secretin-like_GPCR_superfamily_signature	357	380	2.4e-06	IPR000832	GPCR,_family_2,_secretin-like	NA
B	4	O_bimaculoides	Omin011712p_OCMIN	Omin011712m	Pfam	PF00002	7_transmembrane_receptor_(Secretin_family)	2	219	9e-13	IPR000832	GPCR,_family_2,_secretin-like	NA
B	4	O_bimaculoides	Omin011712p_OCMIN	Omin011712m	Gene3D	G3DSA:1.20.1070.10	NA	1	257	5.4e-38	NA	NA	GO:0005515
B	4	O_bimaculoides	Omin011712p_OCMIN	Omin011712m	PANTHER	PTHR12011:SF432	NA	2	232	4.1e-36	NA	NA	NA
B	4	O_bimaculoides	Omin011712p_OCMIN	Omin011712m	PANTHER	PTHR12011	NA	2	232	4.1e-36	NA	NA	NA
B	4	O_bimaculoides	Omin011712p_OCMIN	Omin011712m	CDD	cd15039	7tmB3_Methuselah-like	1	235	5.69e-48	NA	NA	GO:0016020
B	3	O_bimaculoides	Omin012674p_OCMIN	Omin012674m	PANTHER	PTHR12011	NA	12	238	4.4e-60	NA	NA	NA
B	3	O_bimaculoides	Omin012674p_OCMIN	Omin012674m	Pfam	PF00002	7_transmembrane_receptor_(Secretin_family)	11	214	8.7e-30	IPR000832	GPCR,_family_2,_secretin-like	NA
B	3	O_bimaculoides	Omin012674p_OCMIN	Omin012674m	SUPERFAMILY	SSF81321	NA	19	241	1.28e-09	NA	NA	NA
B	3	O_bimaculoides	Omin012674p_OCMIN	Omin012674m	Gene3D	G3DSA:1.20.1070.10	NA	1	257	9.6e-56	NA	NA	NA
B	3	O_bimaculoides	Omin012674p_OCMIN	Omin012674m	CDD	cd15040	7tmB2_Adhesion	3	227	4.44e-61	NA	NA	NA
B	3	O_bimaculoides	Omin013104p_OCMIN	Omin013104m	Gene3D	G3DSA:1.20.1070.10	NA	293	585	5.3e-65	NA	NA	NA
B	3	O_bimaculoides	Omin013104p_OCMIN	Omin013104m	Pfam	PF01825	GPCR_proteolysis_site,_GPS,_motif	248	292	1e-12	IPR000203	GPS_motif	NA
B	3	O_bimaculoides	Omin013104p_OCMIN	Omin013104m	PRINTS	PR00249	Secretin-like_GPCR_superfamily_signature	458	483	4.8e-12	IPR000832	GPCR,_family_2,_secretin-like	NA
B	3	O_bimaculoides	Omin013104p_OCMIN	Omin013104m	SMART	SM00303	NA	246	298	4e-11	IPR000203	GPS_motif	NA
B	3	O_bimaculoides	Omin013104p_OCMIN	Omin013104m	PRINTS	PR00249	Secretin-like_GPCR_superfamily_signature	529	550	4.8e-12	IPR000832	GPCR,_family_2,_secretin-like	NA
B	3	O_bimaculoides	Omin013104p_OCMIN	Omin013104m	PRINTS	PR00249	Secretin-like_GPCR_superfamily_signature	310	334	4.8e-12	IPR000832	GPCR,_family_2,_secretin-like	NA
B	3	O_bimaculoides	Omin013104p_OCMIN	Omin013104m	Pfam	PF00002	7_transmembrane_receptor_(Secretin_family)	307	543	7.5e-36	IPR000832	GPCR,_family_2,_secretin-like	NA
B	3	O_bimaculoides	Omin013104p_OCMIN	Omin013104m	SUPERFAMILY	SSF81321	NA	305	579	6.13e-14	NA	NA	NA
B	3	O_bimaculoides	Omin013104p_OCMIN	Omin013104m	PANTHER	PTHR12011	NA	159	583	1.9e-94	NA	NA	NA
B	3	O_bimaculoides	Omin013104p_OCMIN	Omin013104m	PRINTS	PR00249	Secretin-like_GPCR_superfamily_signature	376	399	4.8e-12	IPR000832	GPCR,_family_2,_secretin-like	NA
B	3	O_bimaculoides	Omin013104p_OCMIN	Omin013104m	CDD	cd15040	7tmB2_Adhesion	308	556	2.88e-80	NA	NA	GO:0003676
B	3	O_bimaculoides	Omin013104p_OCMIN	Omin013104m	PRINTS	PR00249	Secretin-like_GPCR_superfamily_signature	415	440	4.8e-12	IPR000832	GPCR,_family_2,_secretin-like	NA
B	3	O_bimaculoides	Omin013104p_OCMIN	Omin013104m	Gene3D	G3DSA:2.60.220.50	NA	141	286	1.2e-19	NA	NA	NA
B	4	O_bimaculoides	Omin013821p_OCMIN	Omin013821m	PANTHER	PTHR12011:SF432	NA	191	391	9.1e-47	NA	NA	GO:0003676
B	4	O_bimaculoides	Omin013821p_OCMIN	Omin013821m	Pfam	PF00002	7_transmembrane_receptor_(Secretin_family)	228	392	4.9e-19	IPR000832	GPCR,_family_2,_secretin-like	NA
B	4	O_bimaculoides	Omin013821p_OCMIN	Omin013821m	PANTHER	PTHR12011	NA	191	391	9.1e-47	NA	NA	GO:0003676
B	4	O_bimaculoides	Omin013821p_OCMIN	Omin013821m	CDD	cd15039	7tmB3_Methuselah-like	229	391	7.4e-50	NA	NA	NA
B	4	O_bimaculoides	Omin013821p_OCMIN	Omin013821m	Gene3D	G3DSA:1.20.1070.10	NA	215	394	4.5e-37	NA	NA	GO:0034464_GO:1905515
B	4	O_bimaculoides	Omin013822p_OCMIN	Omin013822m	PRINTS	PR00249	Secretin-like_GPCR_superfamily_signature	655	678	7.1e-05	IPR000832	GPCR,_family_2,_secretin-like	GO:0003676
B	4	O_bimaculoides	Omin013822p_OCMIN	Omin013822m	PRINTS	PR00249	Secretin-like_GPCR_superfamily_signature	747	772	7.1e-05	IPR000832	GPCR,_family_2,_secretin-like	GO:0003676
B	4	O_bimaculoides	Omin013822p_OCMIN	Omin013822m	Pfam	PF00002	7_transmembrane_receptor_(Secretin_family)	1169	1411	5.2e-28	IPR000832	GPCR,_family_2,_secretin-like	NA
B	4	O_bimaculoides	Omin013822p_OCMIN	Omin013822m	Gene3D	G3DSA:1.20.1070.10	NA	576	870	1.7e-59	NA	NA	NA
B	4	O_bimaculoides	Omin013822p_OCMIN	Omin013822m	PRINTS	PR00249	Secretin-like_GPCR_superfamily_signature	819	840	7.1e-05	IPR000832	GPCR,_family_2,_secretin-like	GO:0003676
B	4	O_bimaculoides	Omin013822p_OCMIN	Omin013822m	PRINTS	PR00249	Secretin-like_GPCR_superfamily_signature	592	616	7.1e-05	IPR000832	GPCR,_family_2,_secretin-like	GO:0003676
B	4	O_bimaculoides	Omin013822p_OCMIN	Omin013822m	PANTHER	PTHR12011:SF432	NA	548	866	3.7e-160	NA	NA	NA
B	4	O_bimaculoides	Omin013822p_OCMIN	Omin013822m	PANTHER	PTHR12011:SF432	NA	1126	1455	3.7e-160	NA	NA	NA
B	4	O_bimaculoides	Omin013822p_OCMIN	Omin013822m	SUPERFAMILY	SSF81321	NA	1138	1413	4.94e-07	NA	NA	NA
B	4	O_bimaculoides	Omin013822p_OCMIN	Omin013822m	PANTHER	PTHR12011	NA	1126	1455	3.7e-160	NA	NA	NA
B	4	O_bimaculoides	Omin013822p_OCMIN	Omin013822m	PANTHER	PTHR12011	NA	548	866	3.7e-160	NA	NA	NA
B	4	O_bimaculoides	Omin013822p_OCMIN	Omin013822m	Pfam	PF00002	7_transmembrane_receptor_(Secretin_family)	591	833	5.7e-28	IPR000832	GPCR,_family_2,_secretin-like	NA
B	4	O_bimaculoides	Omin013822p_OCMIN	Omin013822m	CDD	cd15039	7tmB3_Methuselah-like	589	848	1.52e-76	NA	NA	GO:0003729_GO:0005685_GO:0006376
B	4	O_bimaculoides	Omin013822p_OCMIN	Omin013822m	CDD	cd15039	7tmB3_Methuselah-like	1167	1426	4.99e-77	NA	NA	NA
B	4	O_bimaculoides	Omin013822p_OCMIN	Omin013822m	SUPERFAMILY	SSF81321	NA	560	834	1.56e-06	NA	NA	GO:0003676
B	4	O_bimaculoides	Omin013822p_OCMIN	Omin013822m	Gene3D	G3DSA:1.20.1070.10	NA	1154	1447	3.4e-60	NA	NA	NA
B	4	O_bimaculoides	Omin013822p_OCMIN	Omin013822m	Gene3D	G3DSA:1.20.1070.10	NA	65	262	2.3e-16	NA	NA	NA
B	4	O_bimaculoides	Omin013822p_OCMIN	Omin013822m	PANTHER	PTHR12011:SF432	NA	110	217	3.7e-160	NA	NA	NA
B	4	O_bimaculoides	Omin013822p_OCMIN	Omin013822m	PANTHER	PTHR12011	NA	110	217	3.7e-160	NA	NA	NA
B	4	O_bimaculoides	Omin014719p_OCMIN	Omin014719m	PANTHER	PTHR12011:SF349	NA	6	293	1.4e-33	NA	NA	NA
B	4	O_bimaculoides	Omin014719p_OCMIN	Omin014719m	Gene3D	G3DSA:1.20.1070.10	NA	59	299	2.6e-36	NA	NA	NA
B	4	O_bimaculoides	Omin014719p_OCMIN	Omin014719m	PRINTS	PR00249	Secretin-like_GPCR_superfamily_signature	61	85	5.5e-06	IPR000832	GPCR,_family_2,_secretin-like	GO:0003676
B	4	O_bimaculoides	Omin014719p_OCMIN	Omin014719m	Pfam	PF00002	7_transmembrane_receptor_(Secretin_family)	65	272	9.1e-17	IPR000832	GPCR,_family_2,_secretin-like	GO:0005975_GO:0016757
B	4	O_bimaculoides	Omin014719p_OCMIN	Omin014719m	PRINTS	PR00249	Secretin-like_GPCR_superfamily_signature	207	232	5.5e-06	IPR000832	GPCR,_family_2,_secretin-like	GO:0003676
B	4	O_bimaculoides	Omin014719p_OCMIN	Omin014719m	PRINTS	PR00249	Secretin-like_GPCR_superfamily_signature	166	191	5.5e-06	IPR000832	GPCR,_family_2,_secretin-like	GO:0003676
B	4	O_bimaculoides	Omin014719p_OCMIN	Omin014719m	PANTHER	PTHR12011	NA	6	293	1.4e-33	NA	NA	NA
B	4	O_bimaculoides	Omin014980p_OCMIN	Omin014980m	Pfam	PF00002	7_transmembrane_receptor_(Secretin_family)	375	551	1.1e-19	IPR000832	GPCR,_family_2,_secretin-like	GO:0005524_GO:0006457_GO:0006950_GO:0051082
B	4	O_bimaculoides	Omin014980p_OCMIN	Omin014980m	CDD	cd15039	7tmB3_Methuselah-like	373	566	1.12e-46	NA	NA	GO:0003676
B	4	O_bimaculoides	Omin014980p_OCMIN	Omin014980m	PANTHER	PTHR12011	NA	276	554	4.3e-41	NA	NA	NA
B	4	O_bimaculoides	Omin014980p_OCMIN	Omin014980m	Gene3D	G3DSA:1.20.1070.10	NA	371	578	7.5e-37	NA	NA	NA
B	4	O_bimaculoides	Omin014980p_OCMIN	Omin014980m	PANTHER	PTHR12011:SF349	NA	276	554	4.3e-41	NA	NA	NA
A	1	C_minor	Omin015297p_OCMIN	Omin015297m	PANTHER	PTHR24241	NA	28	413	8.5e-38	NA	NA	NA
A	1	C_minor	Omin015297p_OCMIN	Omin015297m	SUPERFAMILY	SSF81321	NA	323	415	1.46e-46	NA	NA	GO:0003723
A	1	C_minor	Omin015297p_OCMIN	Omin015297m	PRINTS	PR00237	Rhodopsin-like_GPCR_superfamily_signature	379	405	2.3e-17	IPR000276	G_protein-coupled_receptor,_rhodopsin-like	NA
A	1	C_minor	Omin015297p_OCMIN	Omin015297m	PRINTS	PR00237	Rhodopsin-like_GPCR_superfamily_signature	111	133	2.3e-17	IPR000276	G_protein-coupled_receptor,_rhodopsin-like	NA
A	1	C_minor	Omin015297p_OCMIN	Omin015297m	Gene3D	G3DSA:1.20.1070.10	NA	273	417	8.4e-16	NA	NA	NA
A	1	C_minor	Omin015297p_OCMIN	Omin015297m	SUPERFAMILY	SSF81321	NA	28	231	1.46e-46	NA	NA	NA
A	1	C_minor	Omin015297p_OCMIN	Omin015297m	PRINTS	PR00237	Rhodopsin-like_GPCR_superfamily_signature	337	361	2.3e-17	IPR000276	G_protein-coupled_receptor,_rhodopsin-like	NA
A	1	C_minor	Omin015297p_OCMIN	Omin015297m	PRINTS	PR00237	Rhodopsin-like_GPCR_superfamily_signature	66	87	2.3e-17	IPR000276	G_protein-coupled_receptor,_rhodopsin-like	NA
A	1	C_minor	Omin015297p_OCMIN	Omin015297m	Pfam	PF00001	7_transmembrane_receptor_(rhodopsin_family)	49	397	8.8e-32	IPR000276	G_protein-coupled_receptor,_rhodopsin-like	NA
A	1	C_minor	Omin015297p_OCMIN	Omin015297m	Gene3D	G3DSA:1.20.1070.10	NA	7	260	1.1e-31	NA	NA	NA
A	1	C_minor	Omin015297p_OCMIN	Omin015297m	CDD	cd00637	7tm_classA_rhodopsin-like	36	401	1.05e-25	NA	NA	GO:0046983
A	1	C_minor	Omin015297p_OCMIN	Omin015297m	PRINTS	PR00237	Rhodopsin-like_GPCR_superfamily_signature	34	58	2.3e-17	IPR000276	G_protein-coupled_receptor,_rhodopsin-like	GO:0006486_GO:0008417_GO:0016020
A	1	C_minor	Omin015298p_OCMIN	Omin015298m	PANTHER	PTHR24229	NA	21	403	9.6e-78	NA	NA	GO:0000786_GO:0003677_GO:0006334
A	1	C_minor	Omin015298p_OCMIN	Omin015298m	CDD	cd00637	7tm_classA_rhodopsin-like	36	393	2.84e-29	NA	NA	GO:0003777_GO:0005524_GO:0007018_GO:0008017
A	1	C_minor	Omin015298p_OCMIN	Omin015298m	Gene3D	G3DSA:1.20.1070.10	NA	6	253	1e-34	NA	NA	NA
A	1	C_minor	Omin015298p_OCMIN	Omin015298m	Gene3D	G3DSA:1.20.1070.10	NA	274	408	1.5e-15	NA	NA	NA
A	1	C_minor	Omin015298p_OCMIN	Omin015298m	SUPERFAMILY	SSF81321	NA	708	797	2.2e-45	NA	NA	NA
A	1	C_minor	Omin015298p_OCMIN	Omin015298m	PRINTS	PR00237	Rhodopsin-like_GPCR_superfamily_signature	371	397	5.3e-17	IPR000276	G_protein-coupled_receptor,_rhodopsin-like	NA
A	1	C_minor	Omin015298p_OCMIN	Omin015298m	SUPERFAMILY	SSF81321	NA	418	625	2.2e-45	NA	NA	NA
A	1	C_minor	Omin015298p_OCMIN	Omin015298m	Pfam	PF00001	7_transmembrane_receptor_(rhodopsin_family)	50	389	2.8e-33	IPR000276	G_protein-coupled_receptor,_rhodopsin-like	NA
A	1	C_minor	Omin015298p_OCMIN	Omin015298m	Pfam	PF00001	7_transmembrane_receptor_(rhodopsin_family)	440	779	5.9e-32	IPR000276	G_protein-coupled_receptor,_rhodopsin-like	NA
A	1	C_minor	Omin015298p_OCMIN	Omin015298m	CDD	cd00637	7tm_classA_rhodopsin-like	426	783	4.14e-28	NA	NA	NA
A	1	C_minor	Omin015298p_OCMIN	Omin015298m	Gene3D	G3DSA:1.20.1070.10	NA	413	639	9.1e-33	NA	NA	GO:0003676
A	1	C_minor	Omin015298p_OCMIN	Omin015298m	PRINTS	PR00237	Rhodopsin-like_GPCR_superfamily_signature	112	134	5.3e-17	IPR000276	G_protein-coupled_receptor,_rhodopsin-like	NA
A	1	C_minor	Omin015298p_OCMIN	Omin015298m	SUPERFAMILY	SSF81321	NA	12	235	1.37e-46	NA	NA	NA
A	1	C_minor	Omin015298p_OCMIN	Omin015298m	PRINTS	PR00237	Rhodopsin-like_GPCR_superfamily_signature	35	59	5.3e-17	IPR000276	G_protein-coupled_receptor,_rhodopsin-like	NA
A	1	C_minor	Omin015298p_OCMIN	Omin015298m	PRINTS	PR00237	Rhodopsin-like_GPCR_superfamily_signature	329	353	5.3e-17	IPR000276	G_protein-coupled_receptor,_rhodopsin-like	GO:0005267_GO:0016020_GO:0071805
A	1	C_minor	Omin015298p_OCMIN	Omin015298m	PRINTS	PR00237	Rhodopsin-like_GPCR_superfamily_signature	67	88	5.3e-17	IPR000276	G_protein-coupled_receptor,_rhodopsin-like	NA
A	1	C_minor	Omin015298p_OCMIN	Omin015298m	Gene3D	G3DSA:1.20.1070.10	NA	664	799	4.2e-15	NA	NA	GO:0005509_GO:0007156_GO:0016020
A	1	C_minor	Omin015298p_OCMIN	Omin015298m	SUPERFAMILY	SSF81321	NA	318	403	1.37e-46	NA	NA	NA
A	1	C_minor	Omin015298p_OCMIN	Omin015298m	PANTHER	PTHR24229	NA	413	793	9.6e-78	NA	NA	GO:0000786_GO:0003677_GO:0006334
B	4	O_bimaculoides	Omin016854p_OCMIN	Omin016854m	Gene3D	G3DSA:1.20.1070.10	NA	1	161	1.3e-22	NA	NA	NA
B	4	O_bimaculoides	Omin016854p_OCMIN	Omin016854m	PANTHER	PTHR12011:SF432	NA	1	102	2.9e-26	NA	NA	NA
B	4	O_bimaculoides	Omin016854p_OCMIN	Omin016854m	PANTHER	PTHR12011	NA	99	157	2.9e-26	NA	NA	NA
B	4	O_bimaculoides	Omin016854p_OCMIN	Omin016854m	PANTHER	PTHR12011:SF432	NA	99	157	2.9e-26	NA	NA	GO:0005509_GO:0016020
B	4	O_bimaculoides	Omin016854p_OCMIN	Omin016854m	Pfam	PF00002	7_transmembrane_receptor_(Secretin_family)	8	104	1.1e-09	IPR000832	GPCR,_family_2,_secretin-like	NA
B	4	O_bimaculoides	Omin016854p_OCMIN	Omin016854m	PANTHER	PTHR12011	NA	1	102	2.9e-26	NA	NA	NA
B	3	O_bimaculoides	Omin016961p_OCMIN	Omin016961m	SMART	SM00303	NA	254	304	7.4e-11	IPR000203	GPS_motif	NA
B	3	O_bimaculoides	Omin016961p_OCMIN	Omin016961m	Gene3D	G3DSA:1.20.1070.10	NA	299	558	5e-47	NA	NA	GO:0004497_GO:0005506_GO:0020037_GO:0055114
B	3	O_bimaculoides	Omin016961p_OCMIN	Omin016961m	Pfam	PF00002	7_transmembrane_receptor_(Secretin_family)	404	523	3.4e-14	IPR000832	GPCR,_family_2,_secretin-like	NA
B	3	O_bimaculoides	Omin016961p_OCMIN	Omin016961m	Pfam	PF01825	GPCR_proteolysis_site,_GPS,_motif	256	298	1.3e-12	IPR000203	GPS_motif	GO:0003676
B	3	O_bimaculoides	Omin016961p_OCMIN	Omin016961m	CDD	cd15040	7tmB2_Adhesion	312	536	1.71e-67	NA	NA	NA
B	3	O_bimaculoides	Omin016961p_OCMIN	Omin016961m	Gene3D	G3DSA:2.60.220.50	NA	152	292	5.6e-19	NA	NA	NA
B	3	O_bimaculoides	Omin016961p_OCMIN	Omin016961m	PANTHER	PTHR12011	NA	143	537	1.6e-83	NA	NA	NA
B	3	O_bimaculoides	Omin016961p_OCMIN	Omin016961m	Pfam	PF00002	7_transmembrane_receptor_(Secretin_family)	313	402	8.7e-11	IPR000832	GPCR,_family_2,_secretin-like	NA
B	4	O_bimaculoides	Omin019347p_OCMIN	Omin019347m	PANTHER	PTHR12011:SF432	NA	308	636	6.8e-74	NA	NA	GO:0008152_GO:0016491
B	4	O_bimaculoides	Omin019347p_OCMIN	Omin019347m	Gene3D	G3DSA:1.20.1070.10	NA	344	635	3.9e-60	NA	NA	NA
B	4	O_bimaculoides	Omin019347p_OCMIN	Omin019347m	CDD	cd15039	7tmB3_Methuselah-like	348	610	1.75e-79	NA	NA	NA
B	4	O_bimaculoides	Omin019347p_OCMIN	Omin019347m	Pfam	PF00002	7_transmembrane_receptor_(Secretin_family)	352	594	2e-29	IPR000832	GPCR,_family_2,_secretin-like	NA
B	4	O_bimaculoides	Omin019347p_OCMIN	Omin019347m	SUPERFAMILY	SSF81321	NA	332	632	1.92e-06	NA	NA	NA
B	4	O_bimaculoides	Omin019347p_OCMIN	Omin019347m	PANTHER	PTHR12011	NA	308	636	6.8e-74	NA	NA	GO:0008152_GO:0016491
B	4	O_bimaculoides	Omin019348p_OCMIN	Omin019348m	PRINTS	PR00249	Secretin-like_GPCR_superfamily_signature	363	387	7.7e-06	IPR000832	GPCR,_family_2,_secretin-like	GO:0003676
B	4	O_bimaculoides	Omin019348p_OCMIN	Omin019348m	PANTHER	PTHR12011:SF432	NA	325	549	8.3e-52	NA	NA	NA
B	4	O_bimaculoides	Omin019348p_OCMIN	Omin019348m	Gene3D	G3DSA:1.20.1070.10	NA	347	563	3.7e-48	NA	NA	NA
B	4	O_bimaculoides	Omin019348p_OCMIN	Omin019348m	PANTHER	PTHR12011	NA	325	549	8.3e-52	NA	NA	NA
B	4	O_bimaculoides	Omin019348p_OCMIN	Omin019348m	PRINTS	PR00249	Secretin-like_GPCR_superfamily_signature	426	449	7.7e-06	IPR000832	GPCR,_family_2,_secretin-like	NA
B	4	O_bimaculoides	Omin019348p_OCMIN	Omin019348m	Pfam	PF00002	7_transmembrane_receptor_(Secretin_family)	362	543	1.5e-26	IPR000832	GPCR,_family_2,_secretin-like	GO:0003676
B	4	O_bimaculoides	Omin019348p_OCMIN	Omin019348m	CDD	cd15039	7tmB3_Methuselah-like	358	552	8.53e-68	NA	NA	GO:0004672_GO:0005524_GO:0006468
B	4	O_bimaculoides	Omin019348p_OCMIN	Omin019348m	PRINTS	PR00249	Secretin-like_GPCR_superfamily_signature	518	543	7.7e-06	IPR000832	GPCR,_family_2,_secretin-like	GO:0003676
B	4	O_bimaculoides	Omin019349p_OCMIN	Omin019349m	PANTHER	PTHR12011	NA	340	612	2.7e-64	NA	NA	NA
B	4	O_bimaculoides	Omin019349p_OCMIN	Omin019349m	Pfam	PF00002	7_transmembrane_receptor_(Secretin_family)	379	612	1.1e-26	IPR000832	GPCR,_family_2,_secretin-like	NA
B	4	O_bimaculoides	Omin019349p_OCMIN	Omin019349m	PRINTS	PR00249	Secretin-like_GPCR_superfamily_signature	535	560	9.8e-05	IPR000832	GPCR,_family_2,_secretin-like	NA
B	4	C._minor	Omin019349p_OCMIN	Omin019349m	PRINTS	PR00249	Secretin-like_GPCR_superfamily_signature	443	466	9.8e-05	IPR000832	GPCR,_family_2,_secretin-like	NA
B	4	O_bimaculoides	Omin019349p_OCMIN	Omin019349m	CDD	cd15039	7tmB3_Methuselah-like	375	613	1.88e-80	NA	NA	GO:0005515
B	4	O_bimaculoides	Omin019349p_OCMIN	Omin019349m	PANTHER	PTHR12011:SF432	NA	340	612	2.7e-64	NA	NA	NA
B	4	O_bimaculoides	Omin019349p_OCMIN	Omin019349m	Gene3D	G3DSA:1.20.1070.10	NA	368	638	5.7e-54	NA	NA	NA
B	4	O_bimaculoides	Omin019349p_OCMIN	Omin019349m	PRINTS	PR00249	Secretin-like_GPCR_superfamily_signature	380	404	9.8e-05	IPR000832	GPCR,_family_2,_secretin-like	NA
B	4	O_bimaculoides	Omin019350p_OCMIN	Omin019350m	Gene3D	G3DSA:1.20.1070.10	NA	358	653	3.1e-63	NA	NA	GO:0004222_GO:0006508
B	4	O_bimaculoides	Omin019350p_OCMIN	Omin019350m	PANTHER	PTHR12011	NA	326	650	1.3e-70	NA	NA	NA
B	4	O_bimaculoides	Omin019350p_OCMIN	Omin019350m	CDD	cd15039	7tmB3_Methuselah-like	369	633	3.76e-87	NA	NA	NA
B	4	O_bimaculoides	Omin019350p_OCMIN	Omin019350m	PRINTS	PR00249	Secretin-like_GPCR_superfamily_signature	529	554	5.8e-06	IPR000832	GPCR,_family_2,_secretin-like	NA
B	4	O_bimaculoides	Omin019350p_OCMIN	Omin019350m	PRINTS	PR00249	Secretin-like_GPCR_superfamily_signature	374	398	5.8e-06	IPR000832	GPCR,_family_2,_secretin-like	NA
B	4	O_bimaculoides	Omin019350p_OCMIN	Omin019350m	Pfam	PF00002	7_transmembrane_receptor_(Secretin_family)	373	615	1.6e-29	IPR000832	GPCR,_family_2,_secretin-like	GO:0046872
B	4	O_bimaculoides	Omin019350p_OCMIN	Omin019350m	PRINTS	PR00249	Secretin-like_GPCR_superfamily_signature	437	460	5.8e-06	IPR000832	GPCR,_family_2,_secretin-like	NA
B	4	O_bimaculoides	Omin019350p_OCMIN	Omin019350m	PANTHER	PTHR12011:SF432	NA	326	650	1.3e-70	NA	NA	NA
A	1	C_minor	Omin019885p_OCMIN	Omin019885m	Pfam	PF00001	7_transmembrane_receptor_(rhodopsin_family)	50	342	9.8e-28	IPR000276	G_protein-coupled_receptor,_rhodopsin-like	NA
A	1	C_minor	Omin019885p_OCMIN	Omin019885m	SUPERFAMILY	SSF81321	NA	12	235	1.37e-37	NA	NA	NA
A	1	C_minor	Omin019885p_OCMIN	Omin019885m	PRINTS	PR00237	Rhodopsin-like_GPCR_superfamily_signature	112	134	1.4e-10	IPR000276	G_protein-coupled_receptor,_rhodopsin-like	NA
A	1	C_minor	Omin019885p_OCMIN	Omin019885m	CDD	cd00637	7tm_classA_rhodopsin-like	36	246	3.55e-27	NA	NA	NA
A	1	C_minor	Omin019885p_OCMIN	Omin019885m	SUPERFAMILY	SSF81321	NA	318	341	1.37e-37	NA	NA	NA
A	1	C_minor	Omin019885p_OCMIN	Omin019885m	PRINTS	PR00237	Rhodopsin-like_GPCR_superfamily_signature	67	88	1.4e-10	IPR000276	G_protein-coupled_receptor,_rhodopsin-like	NA
A	1	C_minor	Omin019885p_OCMIN	Omin019885m	PANTHER	PTHR24229	NA	19	350	1.9e-30	NA	NA	GO:0005515
A	1	C_minor	Omin019885p_OCMIN	Omin019885m	Gene3D	G3DSA:1.20.1070.10	NA	25	365	4.6e-39	NA	NA	NA
A	1	C_minor	Omin019885p_OCMIN	Omin019885m	PRINTS	PR00237	Rhodopsin-like_GPCR_superfamily_signature	35	59	1.4e-10	IPR000276	G_protein-coupled_receptor,_rhodopsin-like	NA
A	1	C_minor	Omin019885p_OCMIN	Omin019885m	PRINTS	PR00237	Rhodopsin-like_GPCR_superfamily_signature	201	224	1.4e-10	IPR000276	G_protein-coupled_receptor,_rhodopsin-like	GO:0005634_GO:0008270
B	3	O_bimaculoides	Omin021526p_OCMIN	Omin021526m	Gene3D	G3DSA:1.20.1070.10	NA	1	193	9.3e-38	NA	NA	GO:0005515
B	3	O_bimaculoides	Omin021526p_OCMIN	Omin021526m	PANTHER	PTHR12011	NA	1	172	5.6e-39	NA	NA	GO:0015078_GO:0015986_GO:0045263
B	3	O_bimaculoides	Omin021526p_OCMIN	Omin021526m	Pfam	PF00002	7_transmembrane_receptor_(Secretin_family)	1	158	9.6e-19	IPR000832	GPCR,_family_2,_secretin-like	NA
B	3	O_bimaculoides	Omin021598p_OCMIN	Omin021598m	Pfam	PF00002	7_transmembrane_receptor_(Secretin_family)	77	205	7.1e-16	IPR000832	GPCR,_family_2,_secretin-like	NA
B	3	O_bimaculoides	Omin021598p_OCMIN	Omin021598m	Gene3D	G3DSA:1.20.1070.10	NA	81	240	5e-29	NA	NA	NA
B	3	O_bimaculoides	Omin021598p_OCMIN	Omin021598m	Gene3D	G3DSA:1.20.1070.10	NA	34	80	2e-05	NA	NA	GO:0003676
B	3	O_bimaculoides	Omin021598p_OCMIN	Omin021598m	PANTHER	PTHR12011	NA	87	219	3.1e-32	NA	NA	NA
B	4	O_bimaculoides	Omin021765p_OCMIN	Omin021765m	CDD	cd15039	7tmB3_Methuselah-like	383	631	1.4e-56	NA	NA	NA
B	4	O_bimaculoides	Omin021765p_OCMIN	Omin021765m	Pfam	PF00002	7_transmembrane_receptor_(Secretin_family)	387	615	6.2e-16	IPR000832	GPCR,_family_2,_secretin-like	GO:0019915
B	4	O_bimaculoides	Omin021765p_OCMIN	Omin021765m	PANTHER	PTHR12011:SF432	NA	474	654	1.3e-44	NA	NA	GO:0004383_GO:0006182
B	4	O_bimaculoides	Omin021765p_OCMIN	Omin021765m	PANTHER	PTHR12011:SF432	NA	343	448	1.3e-44	NA	NA	GO:0004383_GO:0006182
B	4	O_bimaculoides	Omin021765p_OCMIN	Omin021765m	Gene3D	G3DSA:1.20.1070.10	NA	374	656	3.4e-44	NA	NA	GO:0005515
B	4	O_bimaculoides	Omin021765p_OCMIN	Omin021765m	PANTHER	PTHR12011	NA	343	448	1.3e-44	NA	NA	GO:0020037
B	4	O_bimaculoides	Omin021765p_OCMIN	Omin021765m	PANTHER	PTHR12011	NA	474	654	1.3e-44	NA	NA	GO:0020037
A	2	C_minor	Omin021998p_OCMIN	Omin021998m	PRINTS	PR00237	Rhodopsin-like_GPCR_superfamily_signature	111	133	1.6e-14	IPR000276	G_protein-coupled_receptor,_rhodopsin-like	NA
A	2	C_minor	Omin021998p_OCMIN	Omin021998m	PANTHER	PTHR24241	NA	39	389	5.6e-39	NA	NA	NA
A	2	C_minor	Omin021998p_OCMIN	Omin021998m	PRINTS	PR00237	Rhodopsin-like_GPCR_superfamily_signature	66	87	1.6e-14	IPR000276	G_protein-coupled_receptor,_rhodopsin-like	NA
A	2	C_minor	Omin021998p_OCMIN	Omin021998m	SUPERFAMILY	SSF81321	NA	32	232	2.38e-38	NA	NA	GO:0005515
A	2	C_minor	Omin021998p_OCMIN	Omin021998m	PRINTS	PR00237	Rhodopsin-like_GPCR_superfamily_signature	313	337	1.6e-14	IPR000276	G_protein-coupled_receptor,_rhodopsin-like	NA
A	2	C_minor	Omin021998p_OCMIN	Omin021998m	PRINTS	PR00237	Rhodopsin-like_GPCR_superfamily_signature	34	58	1.6e-14	IPR000276	G_protein-coupled_receptor,_rhodopsin-like	NA
A	2	C_minor	Omin021998p_OCMIN	Omin021998m	PRINTS	PR00237	Rhodopsin-like_GPCR_superfamily_signature	356	382	1.6e-14	IPR000276	G_protein-coupled_receptor,_rhodopsin-like	NA
A	2	C_minor	Omin021998p_OCMIN	Omin021998m	CDD	cd00637	7tm_classA_rhodopsin-like	35	378	1.41e-22	NA	NA	NA
A	2	C_minor	Omin021998p_OCMIN	Omin021998m	Gene3D	G3DSA:1.20.1070.10	NA	282	392	2.2e-11	NA	NA	GO:0005509_GO:0007156_GO:0016020
A	2	C_minor	Omin021998p_OCMIN	Omin021998m	Pfam	PF00001	7_transmembrane_receptor_(rhodopsin_family)	49	374	2.9e-28	IPR000276	G_protein-coupled_receptor,_rhodopsin-like	GO:0005102_GO:0005576_GO:0007275_GO:0016055
A	2	C_minor	Omin021998p_OCMIN	Omin021998m	SUPERFAMILY	SSF81321	NA	299	413	2.38e-38	NA	NA	NA
A	2	C_minor	Omin021998p_OCMIN	Omin021998m	Gene3D	G3DSA:1.20.1070.10	NA	14	265	6.5e-32	NA	NA	NA
B	3	O_bimaculoides	Omin023463p_OCMIN	Omin023463m	Gene3D	G3DSA:1.20.1070.10	NA	1	176	6.4e-32	NA	NA	NA
B	3	O_bimaculoides	Omin023463p_OCMIN	Omin023463m	PANTHER	PTHR12011	NA	3	176	1.2e-34	NA	NA	NA
B	3	O_bimaculoides	Omin023463p_OCMIN	Omin023463m	Pfam	PF00002	7_transmembrane_receptor_(Secretin_family)	3	173	4.3e-20	IPR000832	GPCR,_family_2,_secretin-like	GO:0005506_GO:0016705_GO:0020037_GO:0055114
B	4	O_bimaculoides	Omin024271p_OCMIN	Omin024271m	Gene3D	G3DSA:1.20.1070.10	NA	182	385	2.2e-32	NA	NA	GO:0003676
B	4	O_bimaculoides	Omin024271p_OCMIN	Omin024271m	SUPERFAMILY	SSF81321	NA	160	375	7.69e-05	NA	NA	GO:0003676
B	4	O_bimaculoides	Omin024271p_OCMIN	Omin024271m	Pfam	PF00002	7_transmembrane_receptor_(Secretin_family)	191	371	4.2e-15	IPR000832	GPCR,_family_2,_secretin-like	GO:0005509_GO:0007156_GO:0016020
B	4	O_bimaculoides	Omin024271p_OCMIN	Omin024271m	PANTHER	PTHR12011:SF349	NA	123	386	1.3e-28	NA	NA	NA
B	4	O_bimaculoides	Omin024271p_OCMIN	Omin024271m	PANTHER	PTHR12011	NA	123	386	1.3e-28	NA	NA	NA
A	1	C_minor	Omin024374p_OCMIN	Omin024374m	PRINTS	PR00237	Rhodopsin-like_GPCR_superfamily_signature	64	85	2.1e-16	IPR000276	G_protein-coupled_receptor,_rhodopsin-like	NA
A	1	C_minor	Omin024374p_OCMIN	Omin024374m	Pfam	PF00001	7_transmembrane_receptor_(rhodopsin_family)	47	239	3.8e-17	IPR000276	G_protein-coupled_receptor,_rhodopsin-like	NA
A	1	C_minor	Omin024374p_OCMIN	Omin024374m	PRINTS	PR00237	Rhodopsin-like_GPCR_superfamily_signature	109	131	2.1e-16	IPR000276	G_protein-coupled_receptor,_rhodopsin-like	NA
A	1	C_minor	Omin024374p_OCMIN	Omin024374m	CDD	cd00637	7tm_classA_rhodopsin-like	34	287	8.38e-25	NA	NA	GO:0003677
A	1	C_minor	Omin024374p_OCMIN	Omin024374m	SUPERFAMILY	SSF81321	NA	32	309	5.31e-38	NA	NA	NA
A	1	C_minor	Omin024374p_OCMIN	Omin024374m	PRINTS	PR00237	Rhodopsin-like_GPCR_superfamily_signature	32	56	2.1e-16	IPR000276	G_protein-coupled_receptor,_rhodopsin-like	NA
A	1	C_minor	Omin024374p_OCMIN	Omin024374m	PRINTS	PR00237	Rhodopsin-like_GPCR_superfamily_signature	265	291	2.1e-16	IPR000276	G_protein-coupled_receptor,_rhodopsin-like	NA
A	1	C_minor	Omin024374p_OCMIN	Omin024374m	PANTHER	PTHR43962:SF6	NA	258	315	2.6e-28	NA	NA	GO:0045454
A	1	C_minor	Omin024374p_OCMIN	Omin024374m	PANTHER	PTHR43962	NA	258	315	2.6e-28	IPR027459	Melatonin_receptor_1	GO:0004550_GO:0006165_GO:0006183_GO:0006228_GO:0006241
A	1	C_minor	Omin024374p_OCMIN	Omin024374m	PANTHER	PTHR43962:SF6	NA	32	245	2.6e-28	NA	NA	NA
A	1	C_minor	Omin024374p_OCMIN	Omin024374m	PANTHER	PTHR43962	NA	32	245	2.6e-28	IPR027459	Melatonin_receptor_1	NA
A	1	C_minor	Omin024374p_OCMIN	Omin024374m	Gene3D	G3DSA:1.20.1070.10	NA	21	307	1.9e-39	NA	NA	GO:0046983
B	3	O_bimaculoides	Omin024607p_OCMIN	Omin024607m	Pfam	PF00002	7_transmembrane_receptor_(Secretin_family)	305	438	7.5e-12	IPR000832	GPCR,_family_2,_secretin-like	GO:0005515
B	3	O_bimaculoides	Omin024607p_OCMIN	Omin024607m	SMART	SM00303	NA	244	296	1.3e-13	IPR000203	GPS_motif	NA
B	3	O_bimaculoides	Omin024607p_OCMIN	Omin024607m	Pfam	PF00002	7_transmembrane_receptor_(Secretin_family)	491	540	1.7e-05	IPR000832	GPCR,_family_2,_secretin-like	NA
B	3	O_bimaculoides	Omin024607p_OCMIN	Omin024607m	PRINTS	PR00249	Secretin-like_GPCR_superfamily_signature	308	332	1.3e-07	IPR000832	GPCR,_family_2,_secretin-like	GO:0003676
B	3	O_bimaculoides	Omin024607p_OCMIN	Omin024607m	PANTHER	PTHR12011	NA	176	573	3.4e-75	NA	NA	NA
B	3	O_bimaculoides	Omin024607p_OCMIN	Omin024607m	Gene3D	G3DSA:1.20.1070.10	NA	291	467	2.4e-25	NA	NA	NA
B	3	O_bimaculoides	Omin024607p_OCMIN	Omin024607m	PRINTS	PR00249	Secretin-like_GPCR_superfamily_signature	383	406	1.3e-07	IPR000832	GPCR,_family_2,_secretin-like	NA
B	3	O_bimaculoides	Omin024607p_OCMIN	Omin024607m	PRINTS	PR00249	Secretin-like_GPCR_superfamily_signature	526	547	1.3e-07	IPR000832	GPCR,_family_2,_secretin-like	GO:0003676
B	3	O_bimaculoides	Omin024607p_OCMIN	Omin024607m	Pfam	PF01825	GPCR_proteolysis_site,_GPS,_motif	247	290	3.5e-14	IPR000203	GPS_motif	GO:0005886_GO:0007155
B	3	O_bimaculoides	Omin024607p_OCMIN	Omin024607m	Gene3D	G3DSA:1.20.1070.10	NA	472	581	1.8e-18	NA	NA	NA
B	3	O_bimaculoides	Omin024607p_OCMIN	Omin024607m	Gene3D	G3DSA:2.60.220.50	NA	121	284	9.2e-19	NA	NA	NA
A	2	C_minor	Omin024615p_OCMIN	Omin024615m	PRINTS	PR00237	Rhodopsin-like_GPCR_superfamily_signature	128	149	1.7e-15	IPR000276	G_protein-coupled_receptor,_rhodopsin-like	GO:0030414
A	2	C_minor	Omin024615p_OCMIN	Omin024615m	Pfam	PF00001	7_transmembrane_receptor_(rhodopsin_family)	117	403	4.6e-23	IPR000276	G_protein-coupled_receptor,_rhodopsin-like	NA
A	2	C_minor	Omin024615p_OCMIN	Omin024615m	CDD	cd00637	7tm_classA_rhodopsin-like	97	407	1.16e-26	NA	NA	NA
A	2	C_minor	Omin024615p_OCMIN	Omin024615m	Gene3D	G3DSA:1.20.1070.10	NA	80	423	2.3e-47	NA	NA	NA
A	2	C_minor	Omin024615p_OCMIN	Omin024615m	SUPERFAMILY	SSF81321	NA	338	421	1.56e-32	NA	NA	NA
A	2	C_minor	Omin024615p_OCMIN	Omin024615m	PRINTS	PR00237	Rhodopsin-like_GPCR_superfamily_signature	173	195	1.7e-15	IPR000276	G_protein-coupled_receptor,_rhodopsin-like	NA
A	2	C_minor	Omin024615p_OCMIN	Omin024615m	PRINTS	PR00237	Rhodopsin-like_GPCR_superfamily_signature	96	120	1.7e-15	IPR000276	G_protein-coupled_receptor,_rhodopsin-like	NA
A	2	C_minor	Omin024615p_OCMIN	Omin024615m	SUPERFAMILY	SSF81321	NA	92	293	1.56e-32	NA	NA	NA
A	2	C_minor	Omin024615p_OCMIN	Omin024615m	PANTHER	PTHR24243	NA	78	414	7e-38	NA	NA	NA
A	2	C_minor	Omin024615p_OCMIN	Omin024615m	PRINTS	PR00237	Rhodopsin-like_GPCR_superfamily_signature	385	411	1.7e-15	IPR000276	G_protein-coupled_receptor,_rhodopsin-like	GO:0030414
B	3	O_bimaculoides	Omin025385p_OCMIN	Omin025385m	Gene3D	G3DSA:1.20.1070.10	NA	358	620	1.2e-50	NA	NA	NA
B	3	O_bimaculoides	Omin025385p_OCMIN	Omin025385m	Pfam	PF00002	7_transmembrane_receptor_(Secretin_family)	372	465	2.7e-13	IPR000832	GPCR,_family_2,_secretin-like	GO:0004494_GO:0008152_GO:0031419
B	3	O_bimaculoides	Omin025385p_OCMIN	Omin025385m	CDD	cd15040	7tmB2_Adhesion	371	599	6.51e-69	NA	NA	NA
B	3	O_bimaculoides	Omin025385p_OCMIN	Omin025385m	Pfam	PF01825	GPCR_proteolysis_site,_GPS,_motif	315	357	1.5e-12	IPR000203	GPS_motif	GO:0007165
B	3	O_bimaculoides	Omin025385p_OCMIN	Omin025385m	PRINTS	PR00249	Secretin-like_GPCR_superfamily_signature	375	399	1.6e-07	IPR000832	GPCR,_family_2,_secretin-like	GO:0003676
B	3	O_bimaculoides	Omin025385p_OCMIN	Omin025385m	SMART	SM00303	NA	313	363	7.7e-12	IPR000203	GPS_motif	GO:0003774_GO:0005096_GO:0035556_GO:0043547
B	3	O_bimaculoides	Omin025385p_OCMIN	Omin025385m	Pfam	PF00002	7_transmembrane_receptor_(Secretin_family)	467	586	6.4e-14	IPR000832	GPCR,_family_2,_secretin-like	GO:0005328_GO:0006836_GO:0016021
B	3	O_bimaculoides	Omin025385p_OCMIN	Omin025385m	PRINTS	PR00249	Secretin-like_GPCR_superfamily_signature	572	593	1.6e-07	IPR000832	GPCR,_family_2,_secretin-like	GO:0003676
B	3	O_bimaculoides	Omin025385p_OCMIN	Omin025385m	Gene3D	G3DSA:2.60.220.50	NA	206	351	7e-19	NA	NA	GO:0005515
B	3	O_bimaculoides	Omin025385p_OCMIN	Omin025385m	PANTHER	PTHR12011	NA	196	600	6.5e-78	NA	NA	NA
B	3	O_bimaculoides	Omin025385p_OCMIN	Omin025385m	PRINTS	PR00249	Secretin-like_GPCR_superfamily_signature	501	526	1.6e-07	IPR000832	GPCR,_family_2,_secretin-like	NA
B	4	O_bimaculoides	Omin025411p_OCMIN	Omin025411m	SUPERFAMILY	SSF81321	NA	374	628	1.65e-05	NA	NA	GO:0003676
B	4	O_bimaculoides	Omin025411p_OCMIN	Omin025411m	PANTHER	PTHR12011	NA	376	634	1.2e-69	NA	NA	NA
B	4	O_bimaculoides	Omin025411p_OCMIN	Omin025411m	PRINTS	PR00249	Secretin-like_GPCR_superfamily_signature	383	407	1.5e-07	IPR000832	GPCR,_family_2,_secretin-like	GO:0003676
B	4	O_bimaculoides	Omin025411p_OCMIN	Omin025411m	PRINTS	PR00249	Secretin-like_GPCR_superfamily_signature	610	631	1.5e-07	IPR000832	GPCR,_family_2,_secretin-like	GO:0003676
B	4	O_bimaculoides	Omin025411p_OCMIN	Omin025411m	Gene3D	G3DSA:1.20.1070.10	NA	369	655	1.7e-58	NA	NA	NA
B	4	O_bimaculoides	Omin025411p_OCMIN	Omin025411m	Pfam	PF00002	7_transmembrane_receptor_(Secretin_family)	383	624	1.5e-27	IPR000832	GPCR,_family_2,_secretin-like	GO:0005200_GO:0005525_GO:0005874_GO:0007017
B	4	O_bimaculoides	Omin025411p_OCMIN	Omin025411m	PANTHER	PTHR12011:SF432	NA	376	634	1.2e-69	NA	NA	NA
B	4	O_bimaculoides	Omin025411p_OCMIN	Omin025411m	PRINTS	PR00249	Secretin-like_GPCR_superfamily_signature	538	563	1.5e-07	IPR000832	GPCR,_family_2,_secretin-like	NA
B	4	O_bimaculoides	Omin025411p_OCMIN	Omin025411m	PRINTS	PR00249	Secretin-like_GPCR_superfamily_signature	446	469	1.5e-07	IPR000832	GPCR,_family_2,_secretin-like	GO:0003676
B	4	O_bimaculoides	Omin025411p_OCMIN	Omin025411m	CDD	cd15039	7tmB3_Methuselah-like	378	640	9.27e-83	NA	NA	NA
A	1	C_minor	Omin025510p_OCMIN	Omin025510m	PRINTS	PR00237	Rhodopsin-like_GPCR_superfamily_signature	330	356	1.6e-14	IPR000276	G_protein-coupled_receptor,_rhodopsin-like	GO:0003924_GO:0005525
A	1	C_minor	Omin025510p_OCMIN	Omin025510m	SUPERFAMILY	SSF81321	NA	50	371	4.67e-48	NA	NA	GO:0046983
A	1	C_minor	Omin025510p_OCMIN	Omin025510m	PRINTS	PR00237	Rhodopsin-like_GPCR_superfamily_signature	87	108	1.6e-14	IPR000276	G_protein-coupled_receptor,_rhodopsin-like	NA
A	1	C_minor	Omin025510p_OCMIN	Omin025510m	Pfam	PF00001	7_transmembrane_receptor_(rhodopsin_family)	70	348	1.8e-28	IPR000276	G_protein-coupled_receptor,_rhodopsin-like	NA
A	1	C_minor	Omin025510p_OCMIN	Omin025510m	PRINTS	PR00237	Rhodopsin-like_GPCR_superfamily_signature	55	79	1.6e-14	IPR000276	G_protein-coupled_receptor,_rhodopsin-like	NA
A	1	C_minor	Omin025510p_OCMIN	Omin025510m	Gene3D	G3DSA:1.20.1070.10	NA	43	375	7.9e-54	NA	NA	GO:0004672_GO:0005524_GO:0006468
A	1	C_minor	Omin025510p_OCMIN	Omin025510m	PANTHER	PTHR43916	NA	40	376	2e-42	NA	NA	GO:0003676
A	1	C_minor	Omin025510p_OCMIN	Omin025510m	PRINTS	PR00237	Rhodopsin-like_GPCR_superfamily_signature	132	154	1.6e-14	IPR000276	G_protein-coupled_receptor,_rhodopsin-like	NA
A	1	C_minor	Omin025510p_OCMIN	Omin025510m	CDD	cd00637	7tm_classA_rhodopsin-like	56	352	3.08e-30	NA	NA	NA
A	1	C_minor	Omin026175p_OCMIN	Omin026175m	PANTHER	PTHR43916	NA	81	403	5.2e-31	NA	NA	NA
A	1	C_minor	Omin026175p_OCMIN	Omin026175m	PRINTS	PR00237	Rhodopsin-like_GPCR_superfamily_signature	158	180	1e-07	IPR000276	G_protein-coupled_receptor,_rhodopsin-like	GO:0003676
A	1	C_minor	Omin026175p_OCMIN	Omin026175m	CDD	cd00637	7tm_classA_rhodopsin-like	97	378	6.93e-29	NA	NA	NA
A	1	C_minor	Omin026175p_OCMIN	Omin026175m	Pfam	PF00001	7_transmembrane_receptor_(rhodopsin_family)	111	374	2.5e-20	IPR000276	G_protein-coupled_receptor,_rhodopsin-like	NA
A	1	C_minor	Omin026175p_OCMIN	Omin026175m	Gene3D	G3DSA:1.20.1070.10	NA	83	401	2.3e-44	NA	NA	GO:0006355_GO:0008270
A	1	C_minor	Omin026175p_OCMIN	Omin026175m	PRINTS	PR00237	Rhodopsin-like_GPCR_superfamily_signature	96	120	1e-07	IPR000276	G_protein-coupled_receptor,_rhodopsin-like	GO:0003676
A	1	C_minor	Omin026175p_OCMIN	Omin026175m	SUPERFAMILY	SSF81321	NA	90	396	7.05e-38	NA	NA	NA
A	1	C_minor	Omin026175p_OCMIN	Omin026175m	PRINTS	PR00237	Rhodopsin-like_GPCR_superfamily_signature	356	382	1e-07	IPR000276	G_protein-coupled_receptor,_rhodopsin-like	GO:0003676
B	4	O_bimaculoides	Omin027432p_OCMIN	Omin027432m	CDD	cd15039	7tmB3_Methuselah-like	348	610	2.1e-79	NA	NA	GO:0004930_GO:0007186_GO:0016021
B	4	O_bimaculoides	Omin027432p_OCMIN	Omin027432m	Gene3D	G3DSA:1.20.1070.10	NA	344	635	3.9e-60	NA	NA	NA
B	4	O_bimaculoides	Omin027432p_OCMIN	Omin027432m	SUPERFAMILY	SSF81321	NA	332	632	5.04e-06	NA	NA	NA
B	4	O_bimaculoides	Omin027432p_OCMIN	Omin027432m	PANTHER	PTHR12011	NA	308	636	7.8e-74	NA	NA	NA
B	4	O_bimaculoides	Omin027432p_OCMIN	Omin027432m	PANTHER	PTHR12011:SF432	NA	308	636	7.8e-74	NA	NA	NA
B	4	O_bimaculoides	Omin027432p_OCMIN	Omin027432m	Pfam	PF00002	7_transmembrane_receptor_(Secretin_family)	352	594	2e-29	IPR000832	GPCR,_family_2,_secretin-like	NA
B	4	O_bimaculoides	Omin027433p_OCMIN	Omin027433m	Pfam	PF00002	7_transmembrane_receptor_(Secretin_family)	342	575	3.2e-22	IPR000832	GPCR,_family_2,_secretin-like	GO:0003676
B	4	O_bimaculoides	Omin027433p_OCMIN	Omin027433m	PANTHER	PTHR12011:SF432	NA	195	610	9.3e-70	NA	NA	NA
B	4	O_bimaculoides	Omin027433p_OCMIN	Omin027433m	PRINTS	PR00249	Secretin-like_GPCR_superfamily_signature	489	514	2.9e-05	IPR000832	GPCR,_family_2,_secretin-like	NA
B	4	O_bimaculoides	Omin027433p_OCMIN	Omin027433m	PRINTS	PR00249	Secretin-like_GPCR_superfamily_signature	440	465	2.9e-05	IPR000832	GPCR,_family_2,_secretin-like	GO:0003676
B	4	O_bimaculoides	Omin027433p_OCMIN	Omin027433m	PANTHER	PTHR12011	NA	195	610	9.3e-70	NA	NA	NA
B	4	O_bimaculoides	Omin027433p_OCMIN	Omin027433m	CDD	cd15039	7tmB3_Methuselah-like	338	593	2.22e-81	NA	NA	GO:0005515
B	4	O_bimaculoides	Omin027433p_OCMIN	Omin027433m	PRINTS	PR00249	Secretin-like_GPCR_superfamily_signature	343	367	2.9e-05	IPR000832	GPCR,_family_2,_secretin-like	GO:0003676
B	4	O_bimaculoides	Omin027433p_OCMIN	Omin027433m	Gene3D	G3DSA:1.20.1070.10	NA	327	613	4.1e-58	NA	NA	NA
B	4	O_bimaculoides	Omin027434p_OCMIN	Omin027434m	Pfam	PF00002	7_transmembrane_receptor_(Secretin_family)	399	608	3.1e-21	IPR000832	GPCR,_family_2,_secretin-like	NA
B	4	O_bimaculoides	Omin027434p_OCMIN	Omin027434m	CDD	cd15039	7tmB3_Methuselah-like	377	624	5.82e-66	NA	NA	NA
B	4	O_bimaculoides	Omin027434p_OCMIN	Omin027434m	SUPERFAMILY	SSF81321	NA	385	628	3.66e-06	NA	NA	GO:0003676
B	4	O_bimaculoides	Omin027434p_OCMIN	Omin027434m	Gene3D	G3DSA:1.20.1070.10	NA	367	642	2.6e-56	NA	NA	GO:0005794_GO:0043004
B	4	O_bimaculoides	Omin027434p_OCMIN	Omin027434m	PANTHER	PTHR12011	NA	241	621	1.3e-56	NA	NA	GO:0003779_GO:0051015_GO:0051017
B	4	O_bimaculoides	Omin027434p_OCMIN	Omin027434m	PANTHER	PTHR12011:SF432	NA	241	621	1.3e-56	NA	NA	NA
B	4	O_bimaculoides	Omin027435p_OCMIN	Omin027435m	PRINTS	PR00249	Secretin-like_GPCR_superfamily_signature	583	604	2e-05	IPR000832	GPCR,_family_2,_secretin-like	NA
B	4	O_bimaculoides	Omin027435p_OCMIN	Omin027435m	PRINTS	PR00249	Secretin-like_GPCR_superfamily_signature	356	380	2e-05	IPR000832	GPCR,_family_2,_secretin-like	GO:0003676
B	4	O_bimaculoides	Omin027435p_OCMIN	Omin027435m	PANTHER	PTHR12011:SF432	NA	721	921	1e-92	NA	NA	NA
B	4	O_bimaculoides	Omin027435p_OCMIN	Omin027435m	Gene3D	G3DSA:1.20.1070.10	NA	825	921	6.7e-17	NA	NA	NA
B	4	O_bimaculoides	Omin027435p_OCMIN	Omin027435m	Gene3D	G3DSA:1.20.1070.10	NA	345	638	3.2e-64	NA	NA	NA
B	4	O_bimaculoides	Omin027435p_OCMIN	Omin027435m	PRINTS	PR00249	Secretin-like_GPCR_superfamily_signature	419	442	2e-05	IPR000832	GPCR,_family_2,_secretin-like	NA
B	4	O_bimaculoides	Omin027435p_OCMIN	Omin027435m	SUPERFAMILY	SSF81321	NA	342	621	9.15e-07	NA	NA	NA
B	4	O_bimaculoides	Omin027435p_OCMIN	Omin027435m	CDD	cd15039	7tmB3_Methuselah-like	351	615	4.8e-86	NA	NA	NA
B	4	O_bimaculoides	Omin027435p_OCMIN	Omin027435m	Pfam	PF00002	7_transmembrane_receptor_(Secretin_family)	355	597	3.3e-29	IPR000832	GPCR,_family_2,_secretin-like	NA
B	4	O_bimaculoides	Omin027435p_OCMIN	Omin027435m	PANTHER	PTHR12011	NA	721	921	1e-92	NA	NA	NA
B	4	O_bimaculoides	Omin027435p_OCMIN	Omin027435m	Pfam	PF00002	7_transmembrane_receptor_(Secretin_family)	839	917	2.7e-07	IPR000832	GPCR,_family_2,_secretin-like	NA
B	4	O_bimaculoides	Omin027435p_OCMIN	Omin027435m	PANTHER	PTHR12011	NA	312	635	1e-92	NA	NA	NA
B	4	O_bimaculoides	Omin027435p_OCMIN	Omin027435m	PANTHER	PTHR12011:SF432	NA	312	635	1e-92	NA	NA	NA
B	4	O_bimaculoides	Omin027435p_OCMIN	Omin027435m	PRINTS	PR00249	Secretin-like_GPCR_superfamily_signature	511	536	2e-05	IPR000832	GPCR,_family_2,_secretin-like	NA
B	3	O_bimaculoides	Omin027826p_OCMIN	Omin027826m	PANTHER	PTHR12011	NA	8	321	1.8e-79	NA	NA	GO:0007015_GO:0031209_GO:0044877
B	3	O_bimaculoides	Omin027826p_OCMIN	Omin027826m	CDD	cd15040	7tmB2_Adhesion	108	320	5.91e-61	NA	NA	GO:0005515
B	3	O_bimaculoides	Omin027826p_OCMIN	Omin027826m	Pfam	PF01825	GPCR_proteolysis_site,_GPS,_motif	48	92	7.1e-15	IPR000203	GPS_motif	GO:0003676
B	3	O_bimaculoides	Omin027826p_OCMIN	Omin027826m	SMART	SM00303	NA	46	98	1.6e-12	IPR000203	GPS_motif	NA
B	3	O_bimaculoides	Omin027826p_OCMIN	Omin027826m	Gene3D	G3DSA:1.20.1070.10	NA	199	347	6.4e-27	NA	NA	NA
B	3	O_bimaculoides	Omin027826p_OCMIN	Omin027826m	Gene3D	G3DSA:2.60.220.50	NA	2	106	2.1e-26	NA	NA	NA
B	3	O_bimaculoides	Omin027826p_OCMIN	Omin027826m	SUPERFAMILY	SSF81321	NA	116	338	3.75e-05	NA	NA	GO:0003676
B	3	O_bimaculoides	Omin027826p_OCMIN	Omin027826m	Pfam	PF00002	7_transmembrane_receptor_(Secretin_family)	107	210	9.1e-13	IPR000832	GPCR,_family_2,_secretin-like	NA
A	2	C_minor	Omin028257p_OCMIN	Omin028257m	SUPERFAMILY	SSF81321	NA	949	1034	5.95e-29	NA	NA	GO:0005509_GO:0007156_GO:0016020
A	2	C_minor	Omin028257p_OCMIN	Omin028257m	Pfam	PF00001	7_transmembrane_receptor_(rhodopsin_family)	44	336	2.6e-20	IPR000276	G_protein-coupled_receptor,_rhodopsin-like	GO:0004252_GO:0006508
A	2	C_minor	Omin028257p_OCMIN	Omin028257m	CDD	cd00637	7tm_classA_rhodopsin-like	355	550	2.44e-15	NA	NA	NA
A	2	C_minor	Omin028257p_OCMIN	Omin028257m	CDD	cd00637	7tm_classA_rhodopsin-like	716	911	1.76e-15	NA	NA	GO:0005744_GO:0030150
A	2	C_minor	Omin028257p_OCMIN	Omin028257m	PANTHER	PTHR24241	NA	26	349	6e-80	NA	NA	NA
A	2	C_minor	Omin028257p_OCMIN	Omin028257m	SUPERFAMILY	SSF81321	NA	697	911	5.95e-29	NA	NA	NA
A	2	C_minor	Omin028257p_OCMIN	Omin028257m	SUPERFAMILY	SSF81321	NA	259	348	3.57e-31	NA	NA	NA
A	2	C_minor	Omin028257p_OCMIN	Omin028257m	PANTHER	PTHR24241:SF76	NA	350	674	6e-80	NA	NA	NA
A	2	C_minor	Omin028257p_OCMIN	Omin028257m	PRINTS	PR00237	Rhodopsin-like_GPCR_superfamily_signature	29	53	1.3e-10	IPR000276	G_protein-coupled_receptor,_rhodopsin-like	NA
A	2	C_minor	Omin028257p_OCMIN	Omin028257m	PRINTS	PR00237	Rhodopsin-like_GPCR_superfamily_signature	61	82	1.3e-10	IPR000276	G_protein-coupled_receptor,_rhodopsin-like	GO:0003676
A	2	C_minor	Omin028257p_OCMIN	Omin028257m	PANTHER	PTHR24241:SF76	NA	26	349	6e-80	NA	NA	NA
A	2	C_minor	Omin028257p_OCMIN	Omin028257m	PRINTS	PR00237	Rhodopsin-like_GPCR_superfamily_signature	106	128	1.3e-10	IPR000276	G_protein-coupled_receptor,_rhodopsin-like	GO:0003676
A	2	C_minor	Omin028257p_OCMIN	Omin028257m	PRINTS	PR00237	Rhodopsin-like_GPCR_superfamily_signature	318	344	1.3e-10	IPR000276	G_protein-coupled_receptor,_rhodopsin-like	GO:0003676
A	2	C_minor	Omin028257p_OCMIN	Omin028257m	Gene3D	G3DSA:1.20.1070.10	NA	16	350	7.1e-39	NA	NA	NA
A	2	C_minor	Omin028257p_OCMIN	Omin028257m	PANTHER	PTHR24241	NA	350	674	6e-80	NA	NA	NA
A	2	C_minor	Omin028257p_OCMIN	Omin028257m	SUPERFAMILY	SSF81321	NA	588	675	1.83e-28	NA	NA	NA
A	2	C_minor	Omin028257p_OCMIN	Omin028257m	SUPERFAMILY	SSF81321	NA	4	225	3.57e-31	NA	NA	NA
A	2	C_minor	Omin028257p_OCMIN	Omin028257m	Gene3D	G3DSA:1.20.1070.10	NA	698	1035	3.2e-34	NA	NA	GO:0005515
A	2	C_minor	Omin028257p_OCMIN	Omin028257m	PANTHER	PTHR24241:SF76	NA	709	1034	6e-80	NA	NA	NA
A	2	C_minor	Omin028257p_OCMIN	Omin028257m	Pfam	PF00001	7_transmembrane_receptor_(rhodopsin_family)	369	663	2.8e-18	IPR000276	G_protein-coupled_receptor,_rhodopsin-like	GO:0004725_GO:0006470
A	2	C_minor	Omin028257p_OCMIN	Omin028257m	PANTHER	PTHR24241	NA	709	1034	6e-80	NA	NA	NA
A	2	C_minor	Omin028257p_OCMIN	Omin028257m	CDD	cd00637	7tm_classA_rhodopsin-like	30	340	2.38e-23	NA	NA	NA
A	2	C_minor	Omin028257p_OCMIN	Omin028257m	SUPERFAMILY	SSF81321	NA	352	550	1.83e-28	NA	NA	NA
A	2	C_minor	Omin028257p_OCMIN	Omin028257m	Gene3D	G3DSA:1.20.1070.10	NA	351	681	1.5e-33	NA	NA	GO:0016021
A	2	C_minor	Omin028257p_OCMIN	Omin028257m	Pfam	PF00001	7_transmembrane_receptor_(rhodopsin_family)	730	1024	1e-18	IPR000276	G_protein-coupled_receptor,_rhodopsin-like	NA
B	4	O_bimaculoides	Omin029956p_OCMIN	Omin029956m	Gene3D	G3DSA:1.20.1070.10	NA	312	550	1e-37	NA	NA	NA
B	4	O_bimaculoides	Omin029956p_OCMIN	Omin029956m	PANTHER	PTHR12011:SF432	NA	282	533	5.4e-44	NA	NA	NA
B	4	O_bimaculoides	Omin029956p_OCMIN	Omin029956m	PANTHER	PTHR12011	NA	282	533	5.4e-44	NA	NA	NA
B	4	O_bimaculoides	Omin029956p_OCMIN	Omin029956m	Pfam	PF00002	7_transmembrane_receptor_(Secretin_family)	327	481	2.6e-18	IPR000832	GPCR,_family_2,_secretin-like	NA
B	4	O_bimaculoides	Omin029956p_OCMIN	Omin029956m	CDD	cd15039	7tmB3_Methuselah-like	322	537	3.04e-69	NA	NA	NA

## Sheet: NearestSequences
Class	Group	Species	Sequence ID	Annotation	Gene ID
A	1	Mizuhopecten yessoensis	A0A210PQS4_A0A210PQS4_MIZYE	Orexin receptor type 2	KP79_PYT23687
A	1	Crassostrea gigas	K1RM13_K1RM13_CRAGI	Cholecystokinin receptor	CGI_10026672
A	1	Mizuhopecten yessoensis	A0A210QCG5_A0A210QCG5_MIZYE	Cholecystokinin receptor type A	KP79_PYT09708
A	1	Crassostrea gigas	K1QRC8_K1QRC8_CRAGI	Muscarinic acetylcholine receptor M3	CGI_10020749
A	1	Mizuhopecten yessoensis	A0A210QLC9_A0A210QLC9_MIZYE	Alpha-2A adrenergic receptor	KP79_PYT23730
A	1	Mizuhopecten yessoensis	A0A210QLF1_A0A210QLF1_MIZYE	Neuropeptide FF receptor 1	KP79_PYT23731
A	1	Lottia gigantea	V3Z803_V3Z803_LOTGI	Uncharacterized protein	LOTGIDRAFT_166703
A	1	Lottia gigantea	V4CKA4_V4CKA4_LOTGI	Uncharacterized protein	LOTGIDRAFT_171870
A	1	Lottia gigantea	V4BAJ7_V4BAJ7_LOTGI	Uncharacterized protein	LOTGIDRAFT_235583
A	1	Mizuhopecten yessoensis	A0A210PSC6_A0A210PSC6_MIZYE	Orexin receptor type 2	KP79_PYT19251
A	1	Mizuhopecten yessoensis	A0A210QV12_A0A210QV12_MIZYE	Orexin receptor type 2	KP79_PYT04053
A	1	Lottia gigantea	V4AJG7_V4AJG7_LOTGI	Uncharacterized protein	LOTGIDRAFT_161082
A	1	Crassostrea gigas	K1QU95_K1QU95_CRAGI	Galanin receptor type 2	CGI_10022812
A	1	Crassostrea gigas	K1QF94_K1QF94_CRAGI	Putative G-protein coupled receptor 83	CGI_10006573
A	1	Crassostrea gigas	K1QSN8_K1QSN8_CRAGI	Substance-K receptor	CGI_10024395
A	1	Crassostrea gigas	K1Q2M3_K1Q2M3_CRAGI	Neuropeptide Y receptor type 4	CGI_10018389
A	1	Mizuhopecten yessoensis	A0A210PQR6_A0A210PQR6_MIZYE	Growth hormone secretagogue receptor type 1	KP79_PYT23713
A	1	Crassostrea gigas	K1RN44_K1RN44_CRAGI	Apelin receptor	CGI_10010835
A	1	Crassostrea gigas	K1PNH4_K1PNH4_CRAGI	Cholecystokinin receptor type A	CGI_10008397
A	1	Crassostrea gigas	K1R873_K1R873_CRAGI	Orexin receptor type 2	CGI_10028153
A	1	Crassostrea gigas	K1Q0V7_K1Q0V7_CRAGI	Orexin receptor type 2	CGI_10024036
A	1	Crassostrea gigas	K1Q7I2_K1Q7I2_CRAGI	COMM domain-containing protein 10	CGI_10000768
A	1	Lottia gigantea	V4C8Y7_V4C8Y7_LOTGI	Uncharacterized protein	LOTGIDRAFT_231336
A	1	Crassostrea gigas	K1QI79_K1QI79_CRAGI	Orexin receptor type 2	CGI_10010921
A	1	Mizuhopecten yessoensis	A0A210PF44_A0A210PF44_MIZYE	Orexin receptor type 2	KP79_PYT13379
A	1	Mizuhopecten yessoensis	A0A210PGU8_A0A210PGU8_MIZYE	Orexin receptor type 2	KP79_PYT03318
A	1	Crassostrea gigas	K1PNG9_K1PNG9_CRAGI	Alpha-2 adrenergic receptor	CGI_10008391
A	1	Mizuhopecten yessoensis	A0A210PGV9_A0A210PGV9_MIZYE	Orexin receptor type 2	KP79_PYT03317
A	1	Lottia gigantea	V4B5B0_V4B5B0_LOTGI	Uncharacterized protein	LOTGIDRAFT_169131
A	1	Lottia gigantea	V3Z9U3_V3Z9U3_LOTGI	Uncharacterized protein	LOTGIDRAFT_166315
A	1	Lottia gigantea	V4BAA0_V4BAA0_LOTGI	Uncharacterized protein	LOTGIDRAFT_156802
A	1	Mizuhopecten yessoensis	A0A210QCI2_A0A210QCI2_MIZYE	Orexin receptor type 2	KP79_PYT09707
A	1	Mizuhopecten yessoensis	A0A210R7I9_A0A210R7I9_MIZYE	Tachykinin-like peptides receptor 99D	KP79_PYT10091
A	1	Crassostrea gigas	K1RND9_K1RND9_CRAGI	Gonadotropin-releasing hormone II receptor	CGI_10022302
A	1	Crassostrea gigas	K1S6Q4_K1S6Q4_CRAGI	Cholecystokinin receptor type A	CGI_10022293
A	1	Crassostrea gigas	K1RVJ9_K1RVJ9_CRAGI	Cephalotocin receptor 1	CGI_10026626
A	1	Mizuhopecten yessoensis	A0A210PQQ1_A0A210PQQ1_MIZYE	Orexin receptor type 2	KP79_PYT23702
A	1	Mizuhopecten yessoensis	A0A210PQU9_A0A210PQU9_MIZYE	Cardioacceleratory peptide receptor	KP79_PYT23700
A	1	Mizuhopecten yessoensis	A0A210PQS2_A0A210PQS2_MIZYE	Orexin receptor type 2	KP79_PYT23701
A	1	Lottia gigantea	V4BBF5_V4BBF5_LOTGI	Uncharacterized protein	LOTGIDRAFT_237684
A	1	Lottia gigantea	V4C9U9_V4C9U9_LOTGI	Uncharacterized protein	LOTGIDRAFT_239028
A	1	Lottia gigantea	V3YYK2_V3YYK2_LOTGI	Uncharacterized protein	LOTGIDRAFT_236803
A	1	Crassostrea gigas	K1QNG5_K1QNG5_CRAGI	Cholecystokinin receptor	CGI_10003650
A	1	Mizuhopecten yessoensis	A0A210QP61_A0A210QP61_MIZYE	Cholecystokinin receptor	KP79_PYT18242
A	1	Crassostrea gigas	K1PFY7_K1PFY7_CRAGI	Neuropeptide FF receptor 2	CGI_10005899
A	1	Crassostrea gigas	K1QG18_K1QG18_CRAGI	C3a anaphylatoxin chemotactic receptor	CGI_10005897
A	1	Crassostrea gigas	K1P9Q9_K1P9Q9_CRAGI	C3a anaphylatoxin chemotactic receptor	CGI_10005898
A	1	Crassostrea gigas	K1PNQ7_K1PNQ7_CRAGI	Rhodopsin, GQ-coupled	CGI_10005895
A	1	Crassostrea gigas	K1PW19_K1PW19_CRAGI	C3a anaphylatoxin chemotactic receptor	CGI_10005896
A	1	Mizuhopecten yessoensis	A0A210PXV4_A0A210PXV4_MIZYE	Orexin receptor type 2	KP79_PYT13148
A	1	Lottia gigantea	V4AF34_V4AF34_LOTGI	Uncharacterized protein	LOTGIDRAFT_171849
A	1	Lottia gigantea	V4AKE4_V4AKE4_LOTGI	Uncharacterized protein	LOTGIDRAFT_152666
A	1	Lottia gigantea	V3ZXP2_V3ZXP2_LOTGI	Uncharacterized protein	LOTGIDRAFT_229072
A	1	Mizuhopecten yessoensis	A0A210QK94_A0A210QK94_MIZYE	Neuromedin-U receptor 2	KP79_PYT23943
A	2	Crassostrea gigas	K1PQN2_K1PQN2_CRAGI	Alpha-2Da adrenergic receptor	CGI_10011406
A	2	Lottia gigantea	V4AKE4_V4AKE4_LOTGI	Uncharacterized protein	LOTGIDRAFT_152666
A	2	Lottia gigantea	V3ZXP2_V3ZXP2_LOTGI	Uncharacterized protein	LOTGIDRAFT_229072
A	2	Mizuhopecten yessoensis	A0A210QK94_A0A210QK94_MIZYE	Neuromedin-U receptor 2	KP79_PYT23943
B	3	Strongylocentrotus purpuratus	W4XYT6_W4XYT6_STRPU	Uncharacterized protein	-
B	3	Branchiostoma floridae	C3XTR9_C3XTR9_BRAFL	Uncharacterized protein (Fragment)	BRAFLDRAFT_185705
B	3	Branchiostoma floridae	C3ZMA5_C3ZMA5_BRAFL	Uncharacterized protein (Fragment)	BRAFLDRAFT_186114
B	3	Crassostrea gigas	K1RD43_K1RD43_CRAGI	Uncharacterized protein	CGI_10005570
B	3	Mizuhopecten yessoensis	A0A210QAH8_A0A210QAH8_MIZYE	G-protein coupled receptor 126	KP79_PYT11606
B	3	Mizuhopecten yessoensis	A0A210QTE0_A0A210QTE0_MIZYE	G-protein coupled receptor 126	KP79_PYT06667
B	3	Lottia gigantea	V4AGH5_V4AGH5_LOTGI	Uncharacterized protein	LOTGIDRAFT_171751
B	3	Human	Q8IZF6_AGRG4_HUMAN	Adhesion G-protein coupled receptor G4	ADGRG4
B	3	Human	Q8IZP9_AGRG2_HUMAN	Adhesion G-protein coupled receptor G2	ADGRG2
B	3	Human	Q86SQ4_AGRG6_HUMAN	Adhesion G-protein coupled receptor G6	ADGRG6
B	3	Human	Q86Y34_AGRG3_HUMAN	Adhesion G protein-coupled receptor G3	ADGRG3
B	3	Human	Q8IZF4_AGRG5_HUMAN	Adhesion G-protein coupled receptor G5	ADGRG5
B	3	Human	Q9Y653_AGRG1_HUMAN	Adhesion G-protein coupled receptor G1	ADGRG1
B	4	Drosophila melanogaster	E2QCS3_E2QCS3_DROME	Methuselah-like 15, isoform C	mthl15
B	4	Strongylocentrotus purpuratus	W4XJU6_W4XJU6_STRPU	Uncharacterized protein	-
B	4	Strongylocentrotus purpuratus	W4ZF38_W4ZF38_STRPU	Uncharacterized protein	-
B	4	Strongylocentrotus purpuratus	W4XJU1_W4XJU1_STRPU	Uncharacterized protein	-
B	4	Anopheles gambiae	Q7PNT9_Q7PNT9_ANOGA	AGAP006218-PA	GPRMTH4
B	4	Anopheles gambiae	A7UU57_A7UU57_ANOGA	AGAP006216-PA	GPRMTH2
B	4	Anopheles gambiae	Q7PNU0_Q7PNU0_ANOGA	AGAP006215-PA	GPRMTH1
B	4	Drosophila melanogaster	Q9W0R5_MTH10_DROME	Probable G-protein coupled receptor Mth-like 10	mthl10
B	4	Drosophila melanogaster	Q9VS77_MTH6_DROME	Probable G-protein coupled receptor Mth-like 6	mthl6
B	4	Drosophila melanogaster	Q9V818_MTH3_DROME	Probable G-protein coupled receptor Mth-like 3	mthl3
B	4	Drosophila melanogaster	Q9V817_MTH4_DROME	Probable G-protein coupled receptor Mth-like 4	mthl4
B	4	Drosophila melanogaster	O97148_MTH_DROME	G-protein coupled receptor Mth	mth
B	4	Drosophila melanogaster	Q9VRN2_MTH2_DROME	Probable G-protein coupled receptor Mth-like 2	mthl2
B	4	Mizuhopecten yessoensis	A0A210Q0Z7_A0A210Q0Z7_MIZYE	G-protein coupled receptor Mth2	KP79_PYT05167
